# Supplementary material for: Efficient biosynthesis of heterodimeric C3-aryl pyrroloindoline alkaloids
Source: PubMed Central journal article supplement (PMC6200733; doi:10.1038/s41467-018-06528-z), 2018-10-24
Supplement: 41467_2018_6528_MOESM1_ESM.pdf [file 41467_2018_6528_MOESM1_ESM.pdf]

## **Supplementary Information**

### **Efficient Biosynthesis of Heterodimeric C3-Aryl Pyrroloindoline Alkaloids**

Tian *et al.*

## Table of Contents

|                                                                      |         |
|----------------------------------------------------------------------|---------|
| Supplementary Figures 1 – 42                                         | 1-70    |
| Supplementary Tables 1 - 38                                          | 71-110  |
| Supplementary Methods                                                | 111-126 |
| General materials and methods                                        | 111     |
| Heterologous expression of the NAS gene cluster                      | 111     |
| Fermentation and metabolites profile analysis                        | 112     |
| Cloning, expression and purification of P450 and associated proteins | 112     |
| Computational Methods                                                | 114     |
| Construction of GB05-dir-T7                                          | 115     |
| Construction of the whole cell catalysis system                      | 115     |
| Scaled biocatalytic reaction and purification of compounds NAS1-30   | 116     |
| Synthesis and Identification of cyclodipeptide substrate             | 116     |
| General methods for analyzing the structures of NASs                 | 124     |
| Bioactivity assay                                                    | 125     |
| Supplementary References                                             | 127     |

## Supplementary Figures

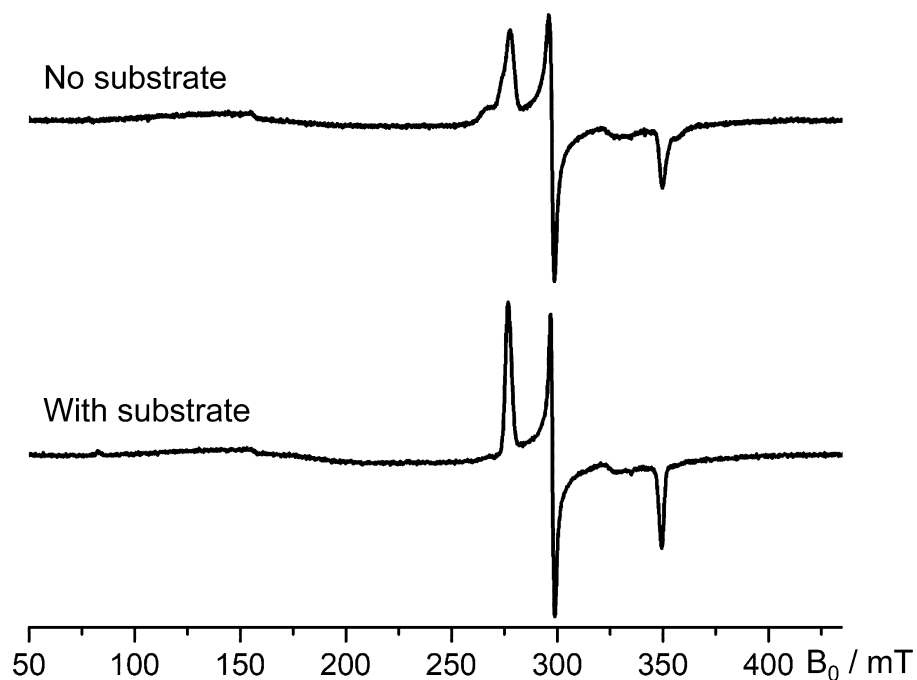

**Supplementary Figure. 1.** X-band (9.3810 GHz) CW EPR spectra analysis. EPR recorded at 15 K showing the high-spin and low-spin (LS) field range of ferric heme signal in the absence (top) and presence (bottom) of the substrate (2-fold excess of  $cW_L\text{-}P_L$ ). The absence of any strong signals at low-field ( $< 250$  mT), indicate that the ferric heme of the P450 is in the low-spin state and hence six coordinated. Data were recorded with a modulation amplitude of 0.5 mT, a modulation frequency of 100 KHz, with a microwave power of 2 mW.

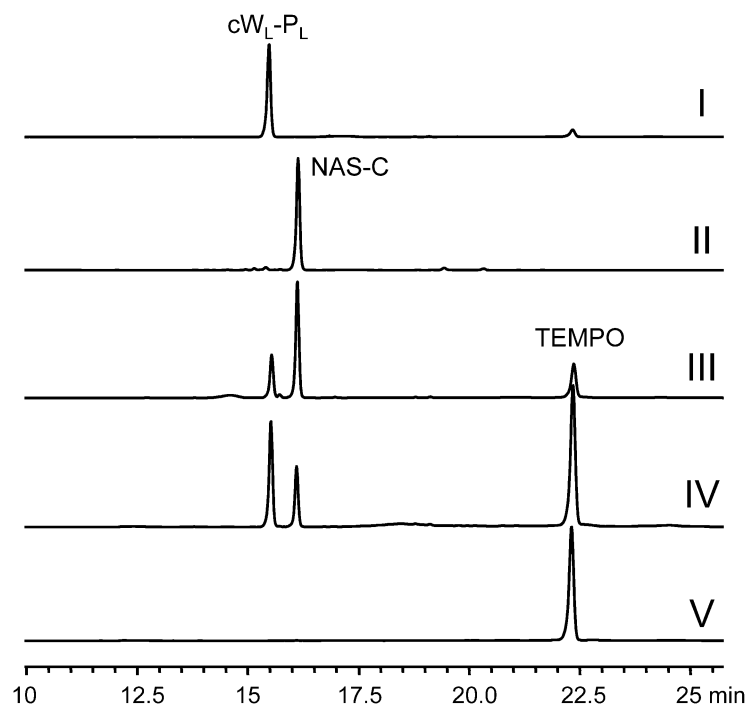

**Supplementary Figure. 2.** Inhibiting NascB activity by TEMPO. (I) Standard substrate  $cW_L-P_L$ ; (II) NascB reaction, which can completely convert the substrate into the product NAS-C; (III) NascB reaction with 1 equiv. Of TEMPO (to  $cW_L-P_L$ ); (IV) NascB reaction with 3 equiv. Of TEMPO; (V) Standard TEMPO.

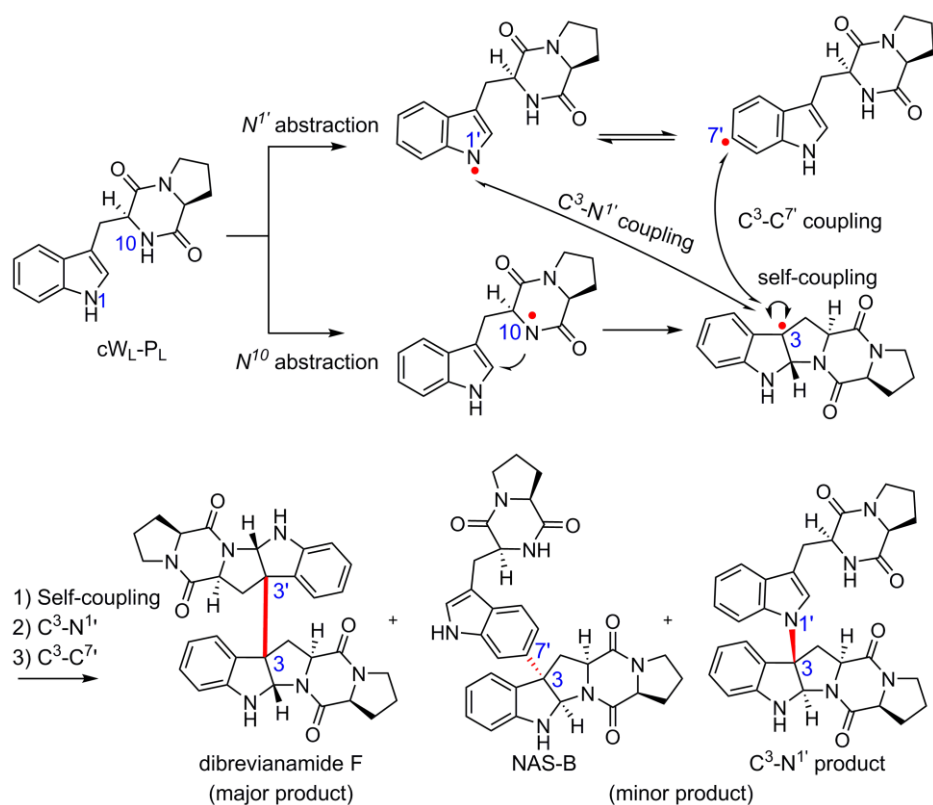

**Supplementary Figure. 3.** The proposed mechanism of the radical-mediated coupling reaction by DtpC<sup>1,2</sup>.

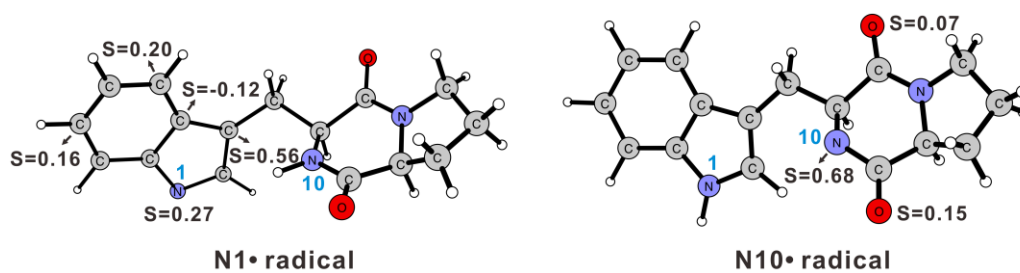

**Supplementary Figure. 4.** Optimized structures of the N<sup>1</sup>• and N<sup>10</sup>•. The unpaired spin population is shown with the indication of "S"

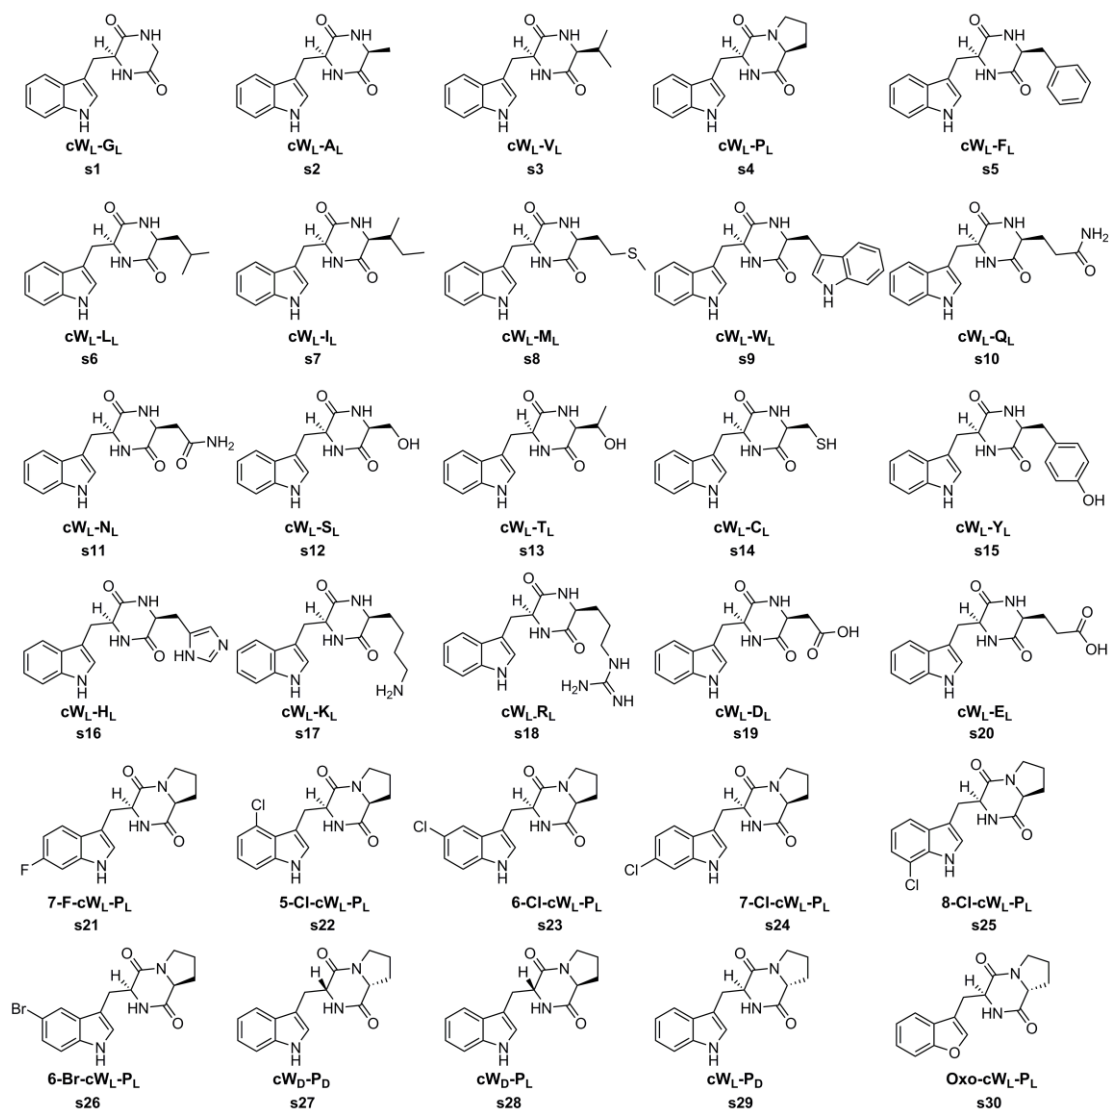

**Supplementary Figure. 5.** Synthetic cyclodipeptide substrates

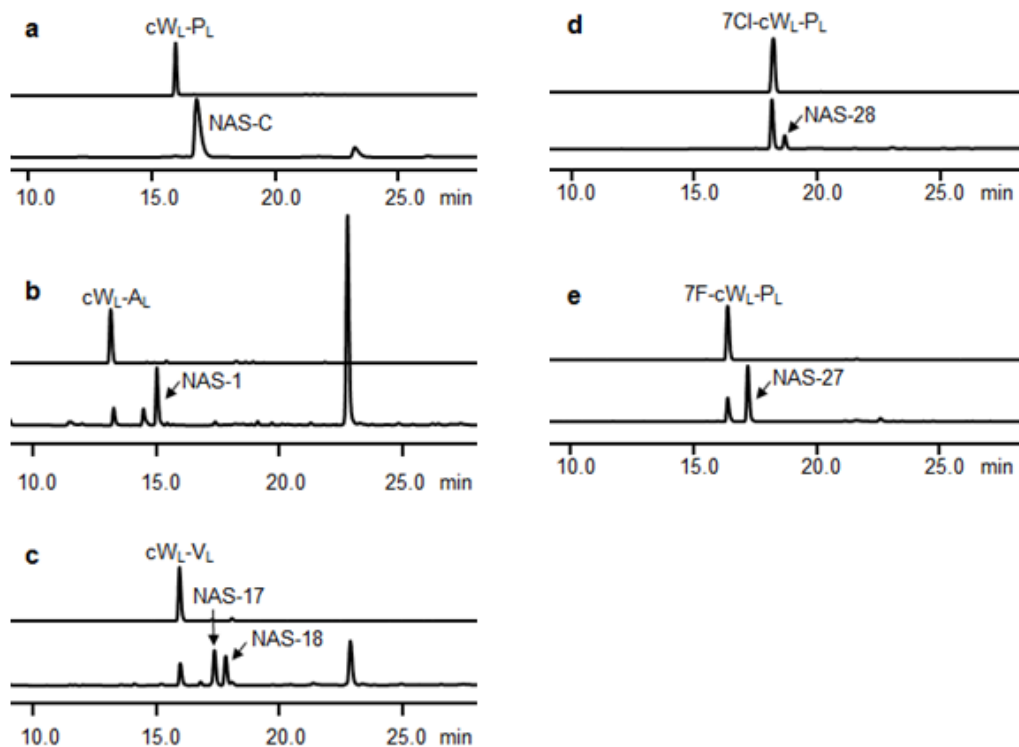

**Supplementary Figure. 6.** Self-dimerization of cyclodipeptides by whole-cell catalysis. The top trace is the HPLC profile of substrate while the bottom trace is that of catalysis system. The product profile in the whole cell catalysis is identical to the purified enzyme catalysis system. The substrates are  $cW_L-P_L$  (a),  $cW_L-A_L$  (b),  $cW_L-V_L$  (c),  $7\text{-Cl-}cW_L-P_L$  (d) and  $7\text{F-}cW_L-P_L$  (e).

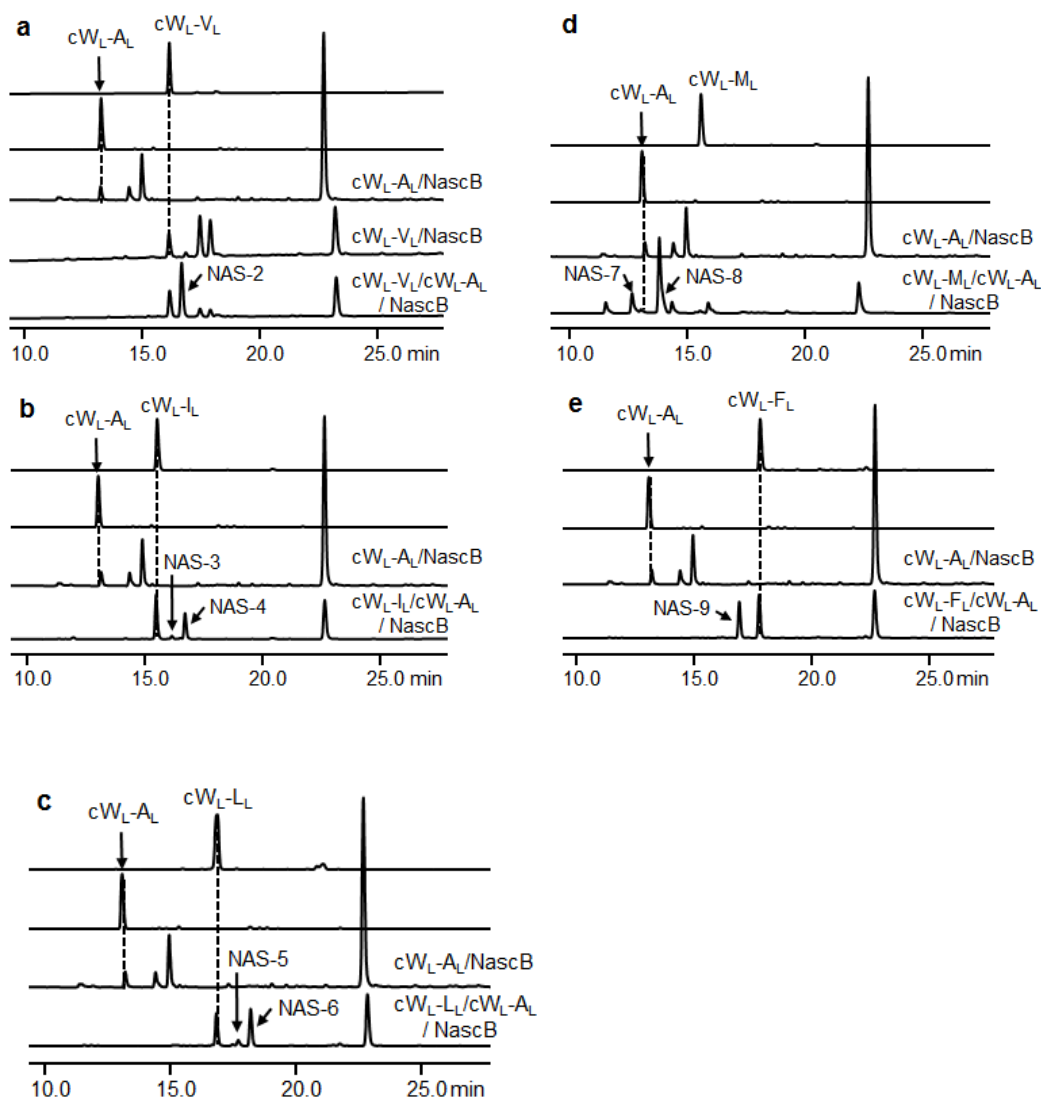

**Supplementary Figure 7.** Dimerization of  $cW_L-A_L$  and other cyclodipeptides by whole-cell catalysis. The substrates are  $cW_L-A_L$  and  $cW_L-V_L$  (a),  $cW_L-A_L$  and  $cW_L-I_L$  (b),  $cW_L-A_L$  and  $cW_L-L_L$  (c),  $cW_L-A_L$  and  $cW_L-M_L$  (d) and  $cW_L-A_L$  and  $cW_L-F_L$  (e).



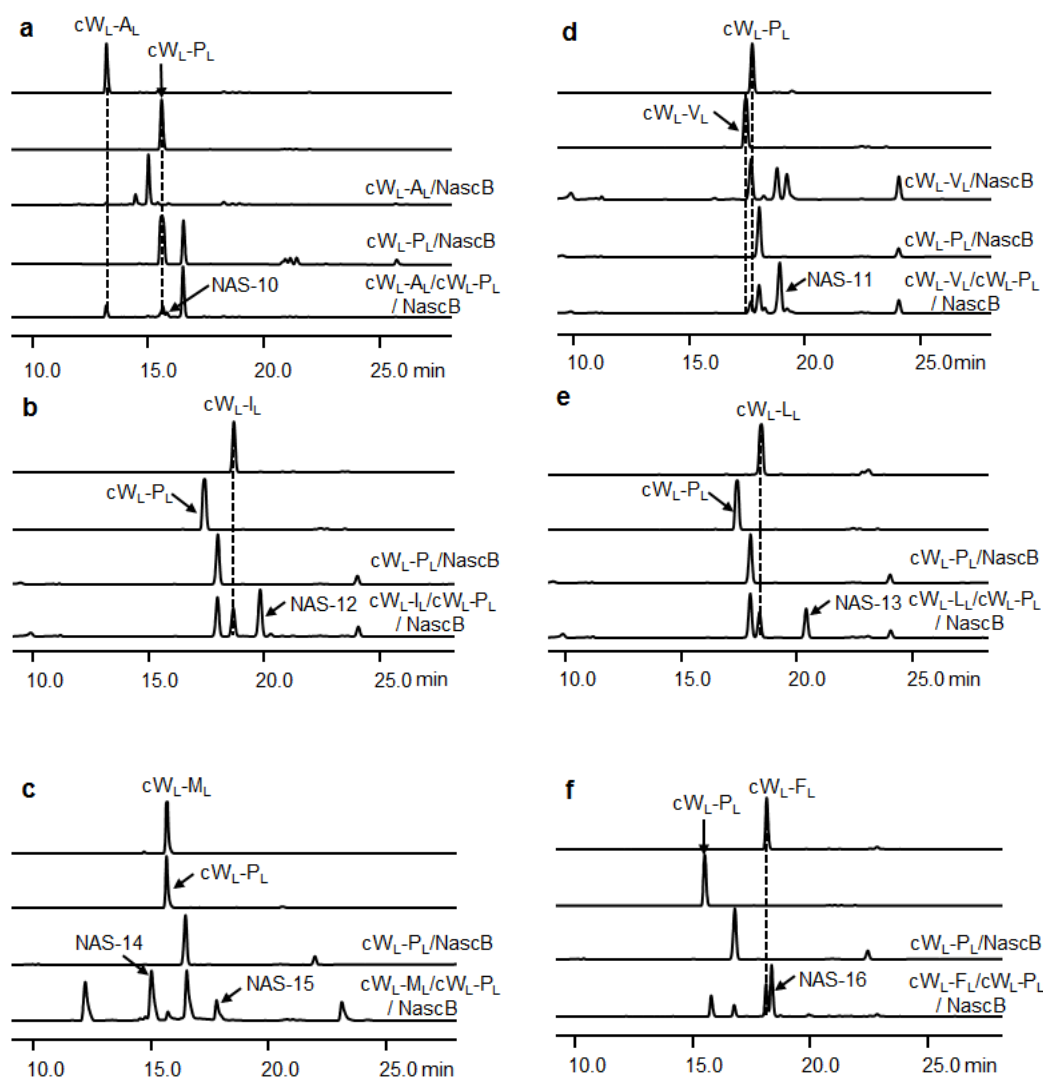

**Supplementary Figure 8.** Dimerization of  $cW_L-P_L$  and other cyclodipeptides by whole-cell catalysis. The substrates are  $cW_L-P_L$  and  $cW_L-A_L$  (a),  $cW_L-P_L$  and  $cW_L-I_L$  (b),  $cW_L-P_L$  and  $cW_L-M_L$  (c),  $cW_L-P_L$  and  $cW_L-V_L$  (d),  $cW_L-P_L$  and  $cW_L-L_L$  (e) and  $cW_L-P_L$  and  $cW_L-F_L$  (f).

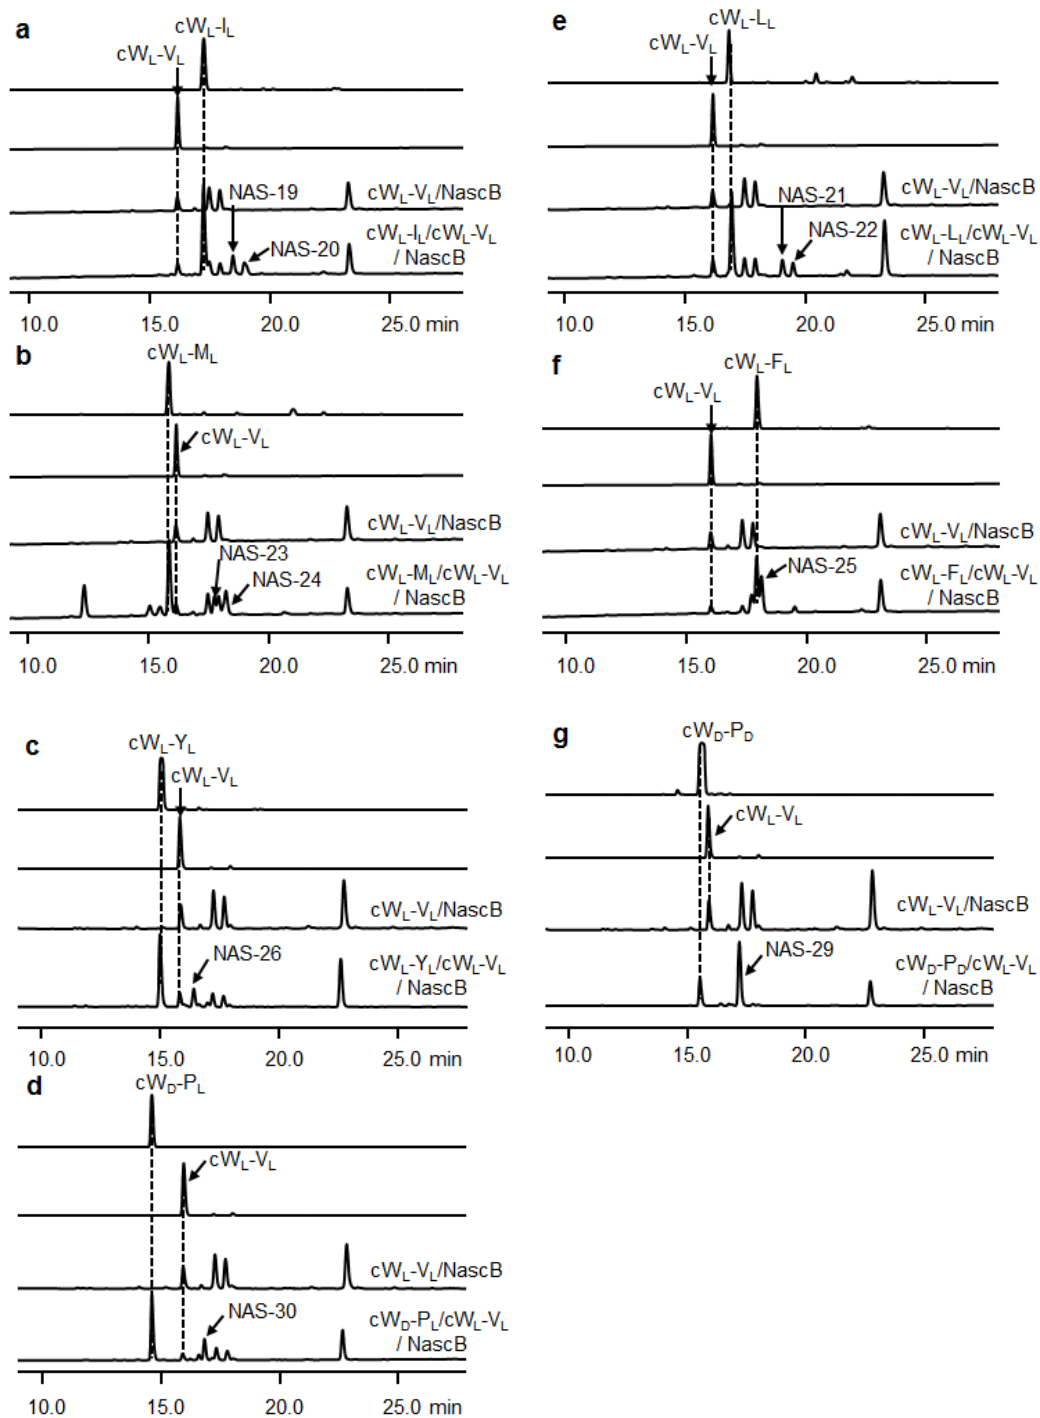

**Supplementary Figure 9.** Dimerization of  $cW_L-V_L$  and other cyclodipeptides by whole-cell catalysis. The substrates are  $cW_L-V_L$  and  $cW_L-I_L$  (a),  $cW_L-V_L$  and  $cW_L-M_L$  (b),  $cW_L-V_L$  and  $cW_L-Y_L$  (c),  $cW_L-V_L$  and  $cW_D-P_L$  (d),  $cW_L-V_L$  and  $cW_L-L_L$  (e),  $cW_L-V_L$  and  $cW_L-F_L$  (f) and  $cW_L-V_L$  and  $cW_D-P_D$ .

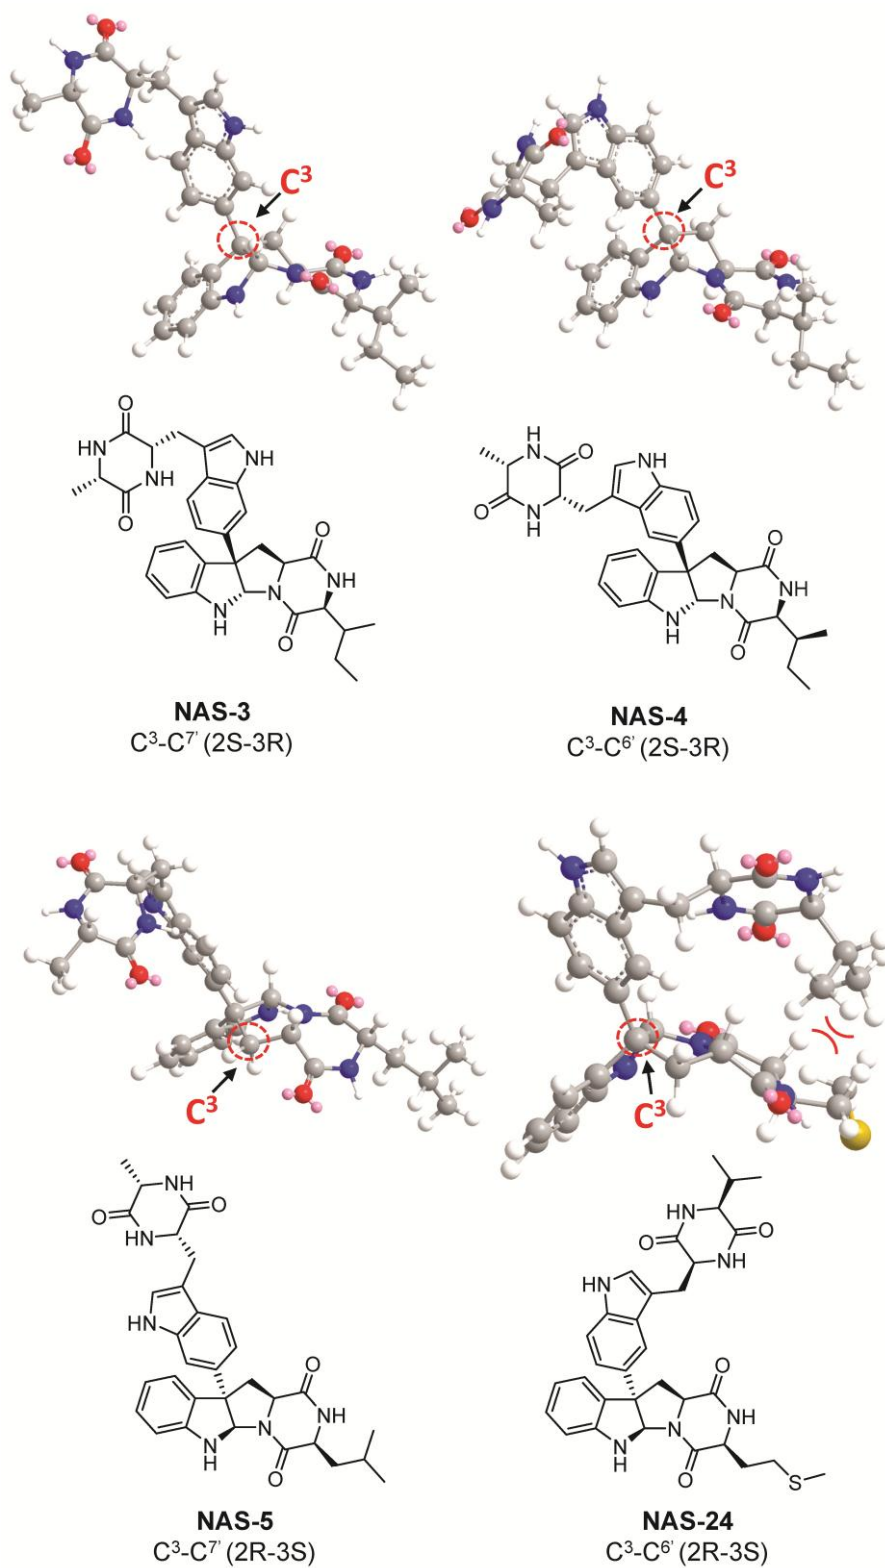

**Supplementary Figure. 10.** Conformation analysis of different types of NAS products. The stereo-conformations were simulated by molecular dynamics using an MM2 force field.

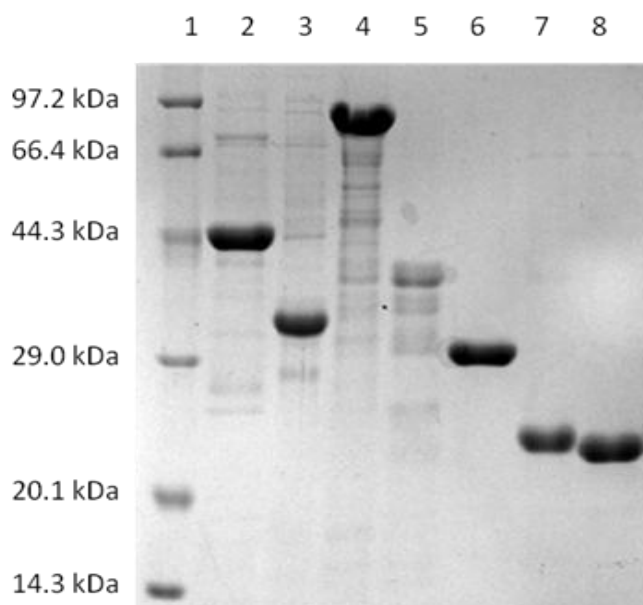

**Supplementary Figure. 11.** 12 % SDS-PAGE analysis of the recombinant proteins. Lane 1: Protein ladder; Lane 2: NascB, 44 kDa; Lane 3: GDH, 30.6 kDa; Lane 4: *Spinach* MBP-Fdr, 80.3 kDa; Lane 5: *Spinach* TRX-Fd, 31.3 kDa; Lane 6: *E. coli* flavodoxin reductase, 29.9 kDa; Lane 7: *E. coli* flavodoxin A, 21.9 kDa; Lane 8: *E. coli* flavodoxin B, 21.8 kDa.

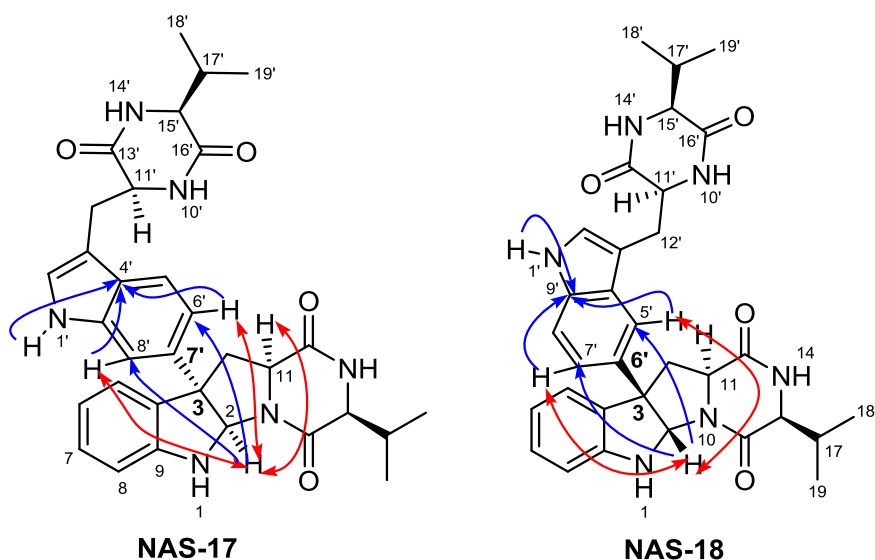

**Supplementary Figure. 12.** Key HMBC and ROESY correlations observed in NAS-17 and NAS-18. Detail analysis please see Supplementary Materials and Methods1.9 (HMBC: Blue; ROESY: Red).

**a**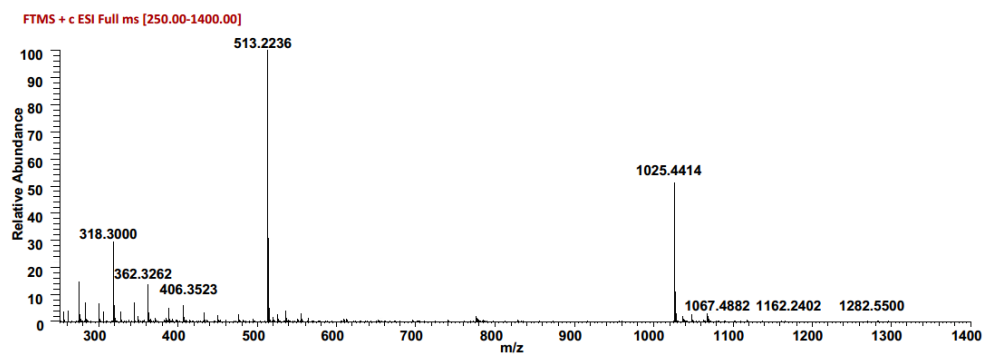**b**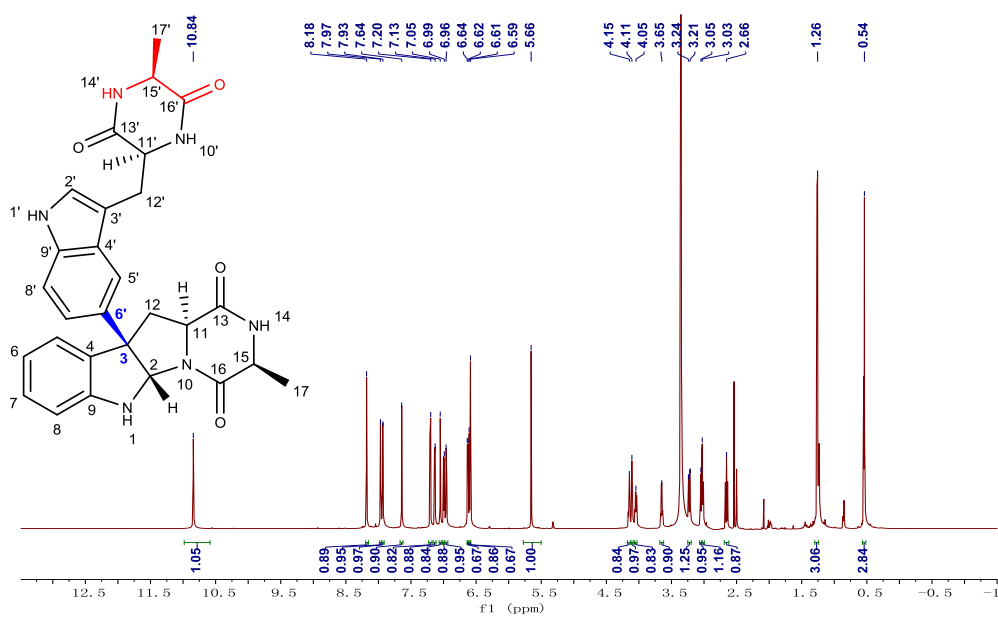**c**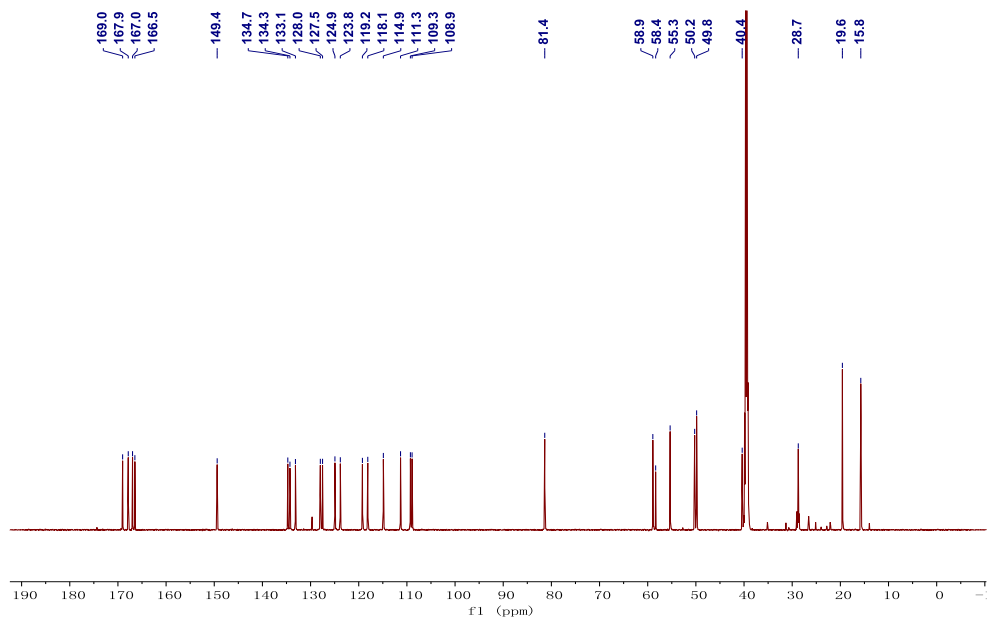

**d**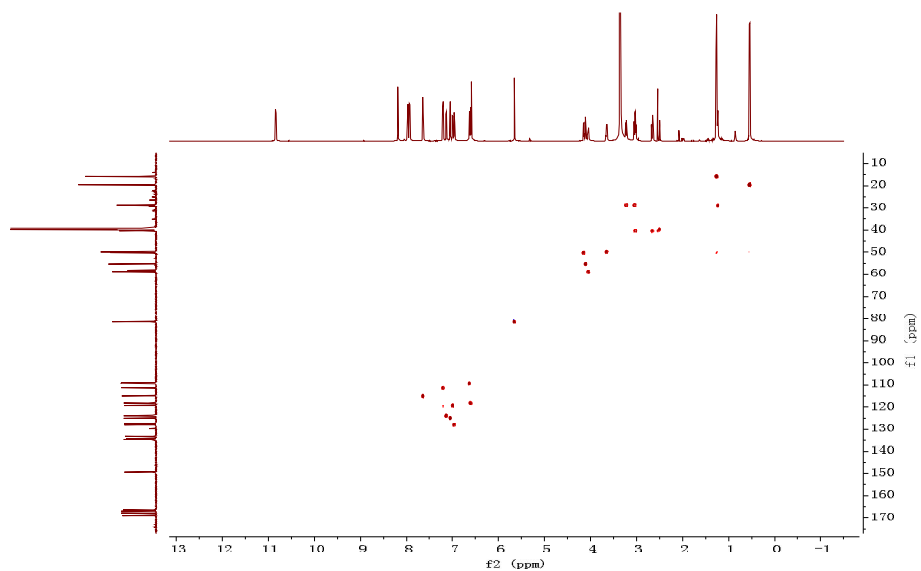**e**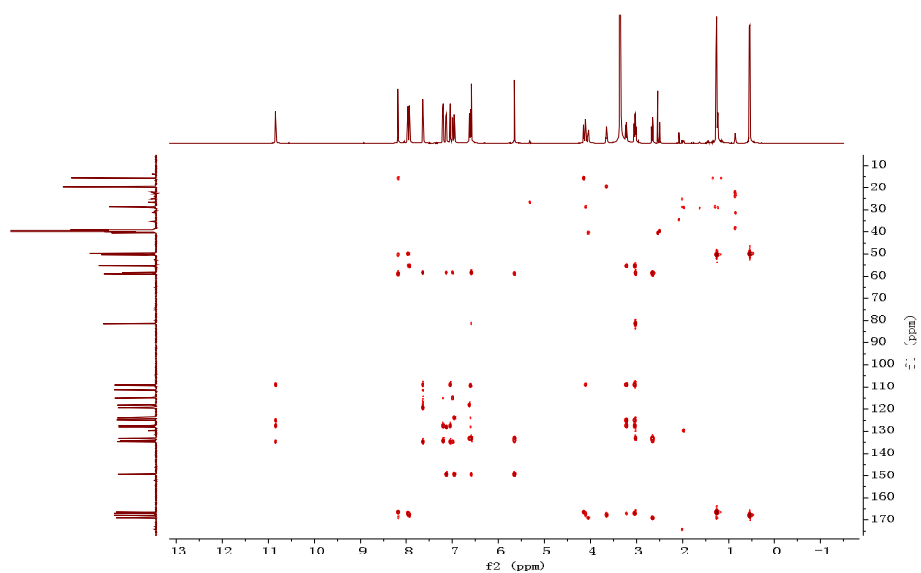**f**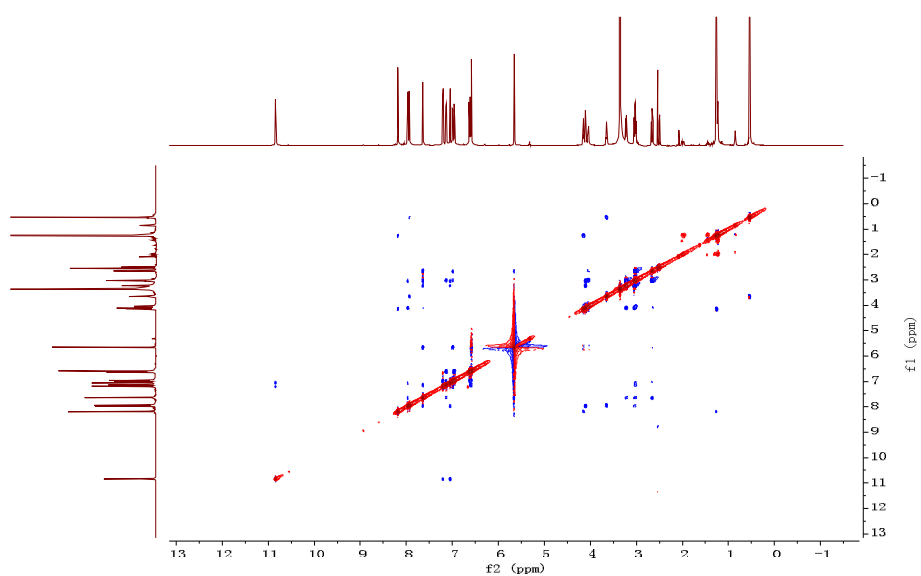

**Supplementary Figure. 13. Spectra of compound NAS-1** (a) HRESIMS of compound of NAS-1 (b)  $^1\text{H}$  NMR of compound of NAS-1 (c)  $^{13}\text{C}$  NMR of compound of NAS-1 (d) HSQC of compound of NAS-1 (e) HMBC of compound of NAS-1 (f) ROSEY of compound of NAS-1

**a**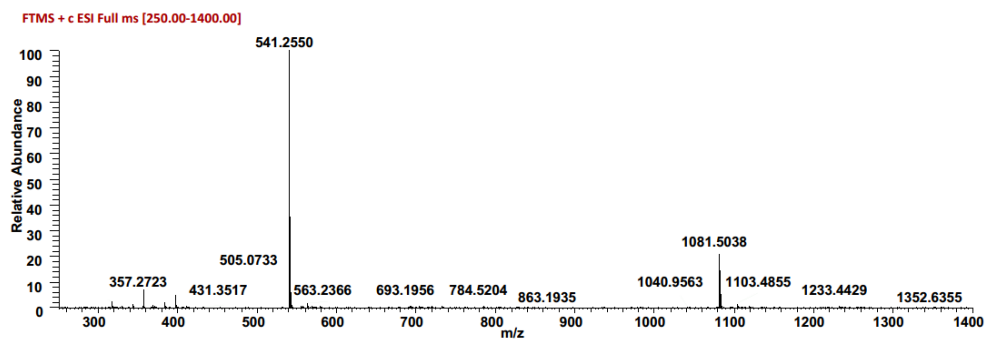**b**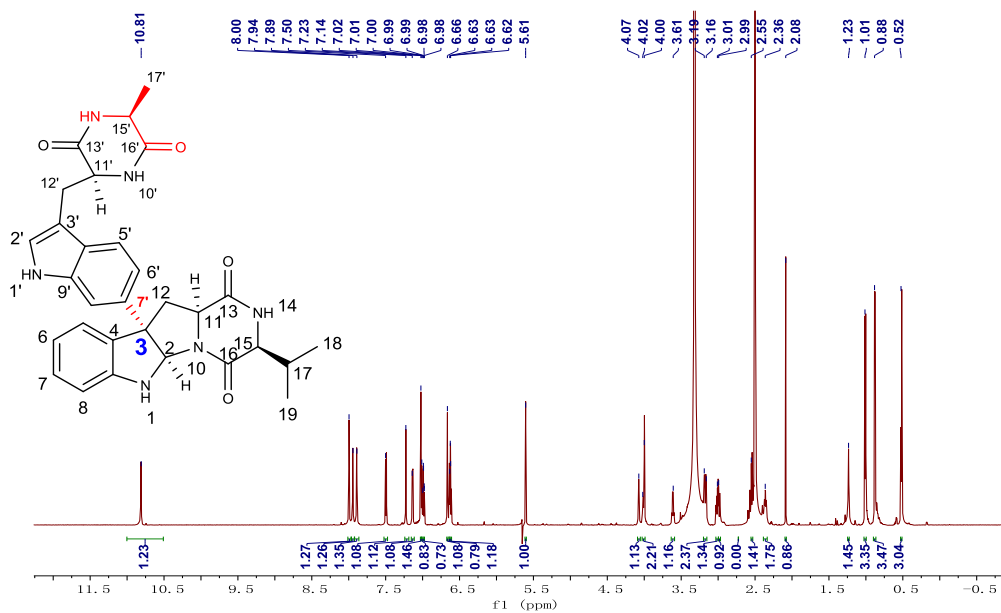**c**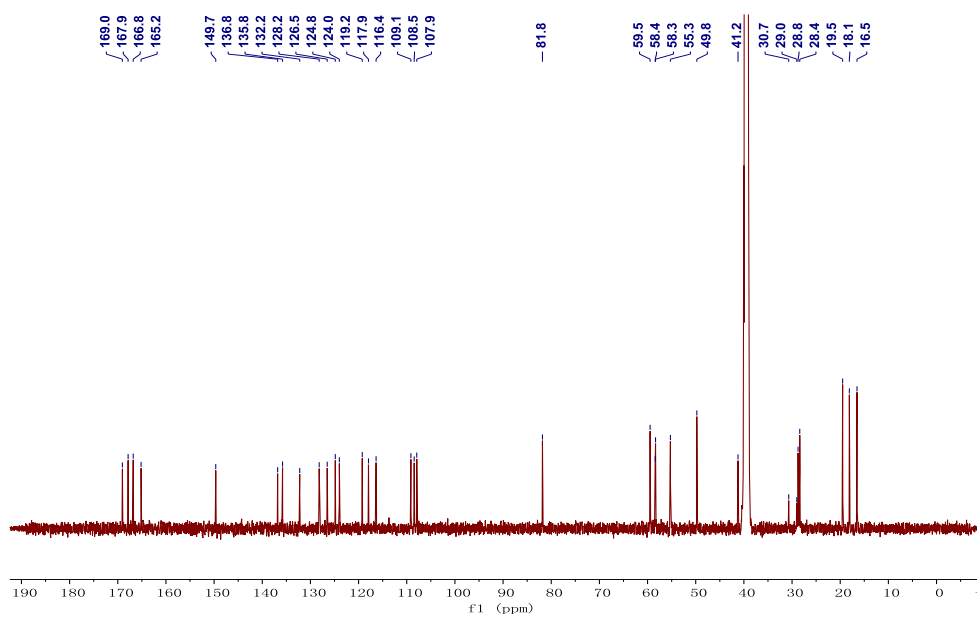

**d**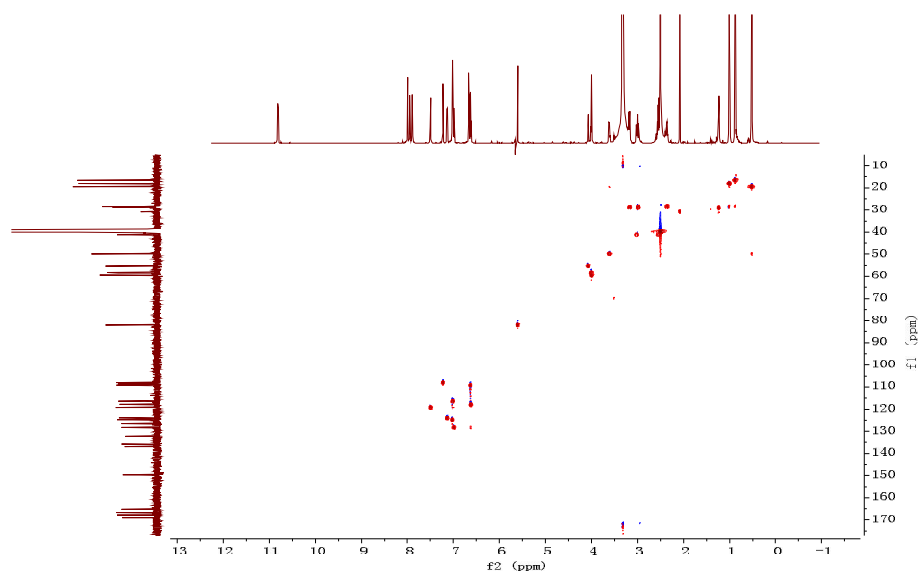**e**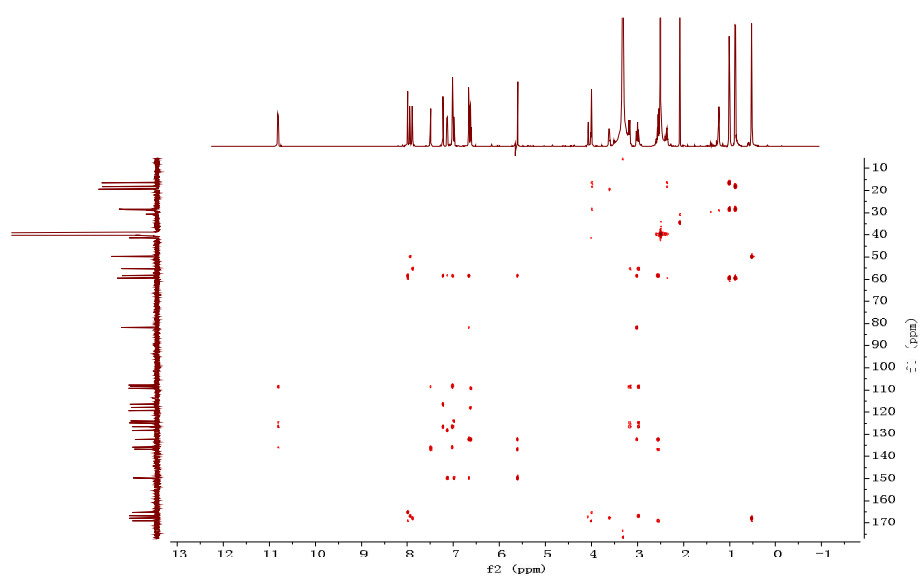**f**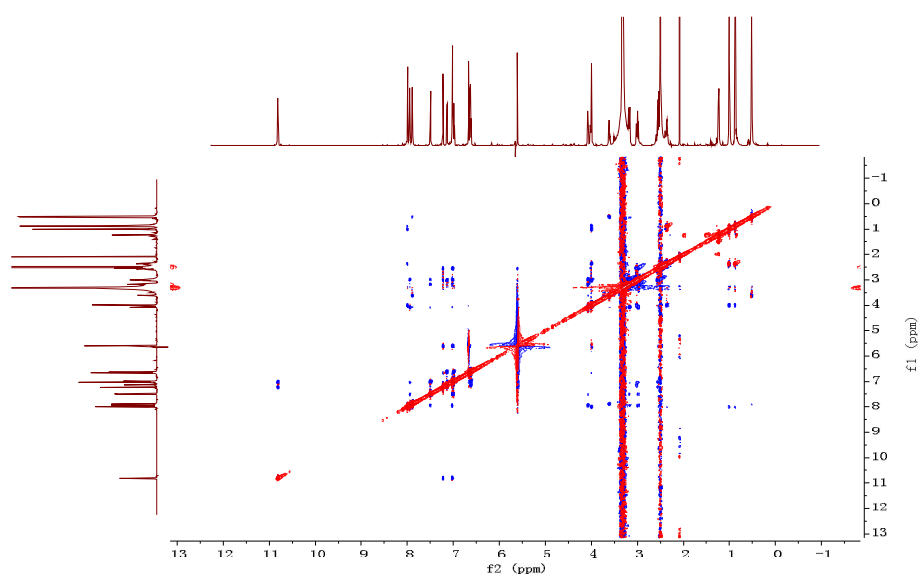

**Supplementary Figure. 14. Spectra of compound NAS-2** (a) HRESIMS of compound of NAS-2 (b)  $^1\text{H}$  NMR of compound of NAS-2 (c)  $^{13}\text{C}$  NMR of compound of NAS-2 (d) HSQC of compound of NAS-2 (e) HMBC of compound of NAS-2 (f) ROSEY of compound of NAS-2



**a**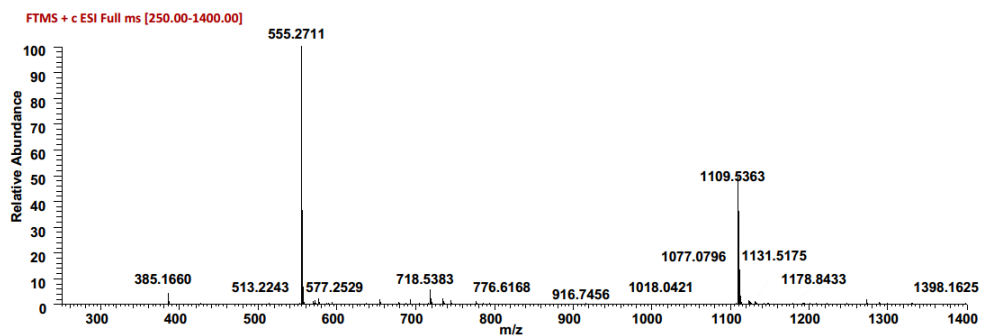**b**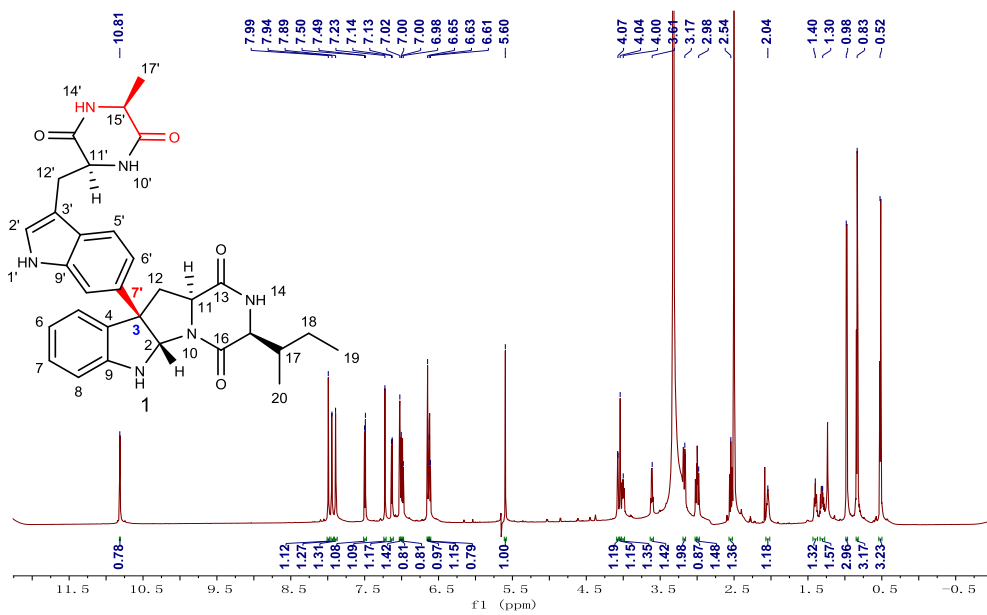**c**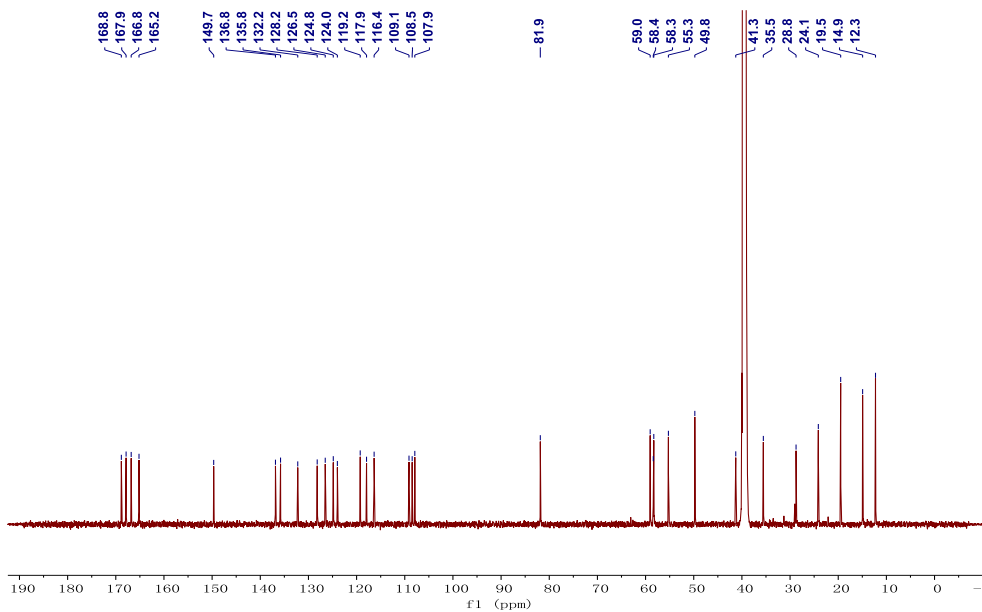

**d**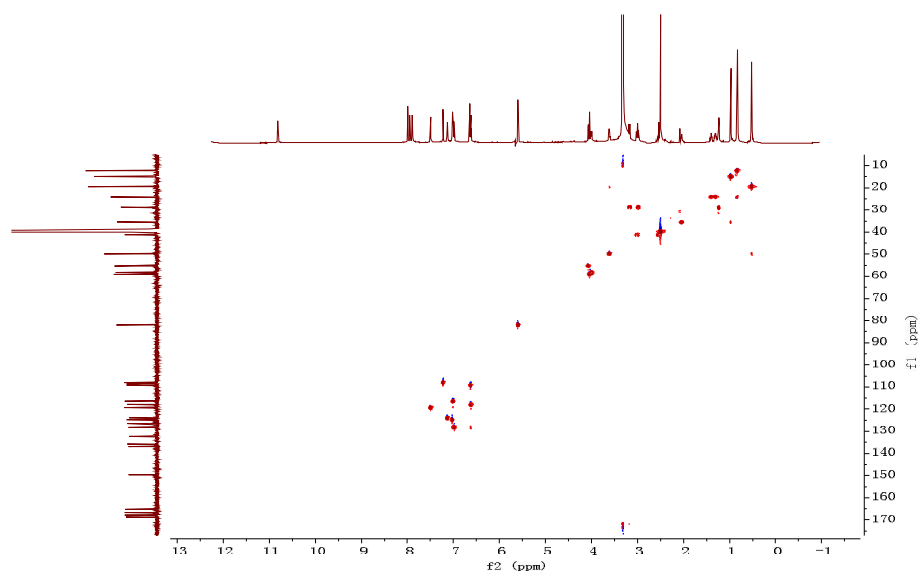**e**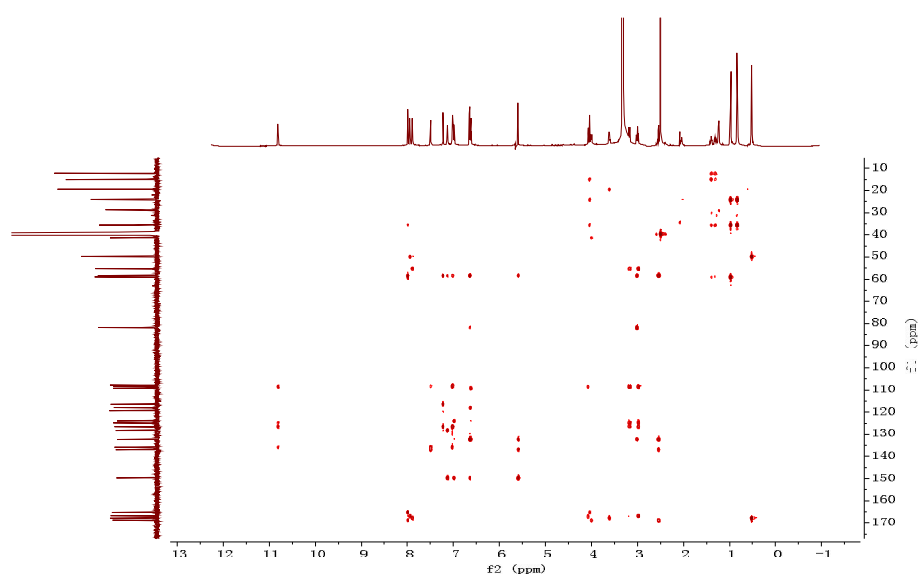**f**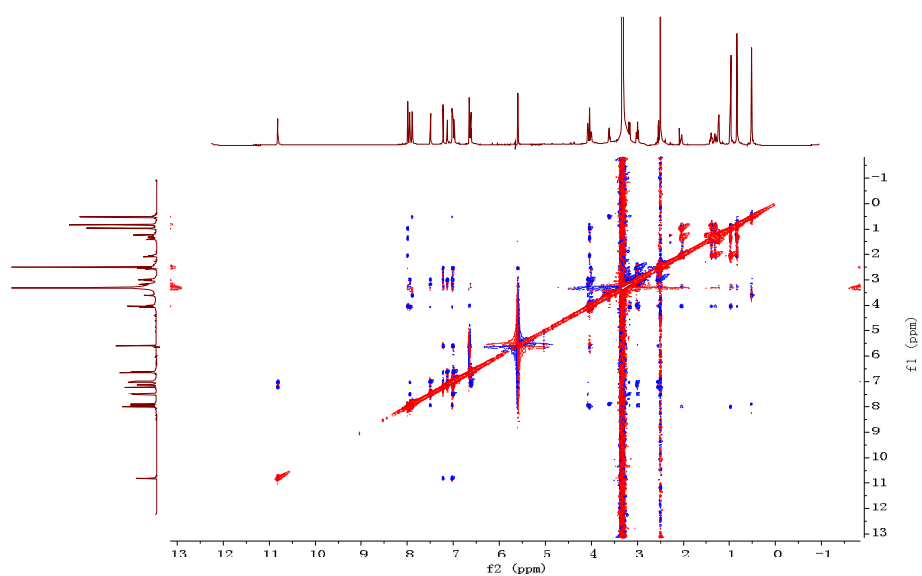

**Supplementary Figure. 15. Spectra of compound NAS-3** (a) HRESIMS of compound of NAS-3 (b)  $^1\text{H}$  NMR of compound of NAS-3 (c)  $^{13}\text{C}$  NMR of compound of NAS-3 (d) HSQC of compound of NAS-3 (e) HMBC of compound of NAS-3 (f) ROSEY of compound of NAS-3

**a**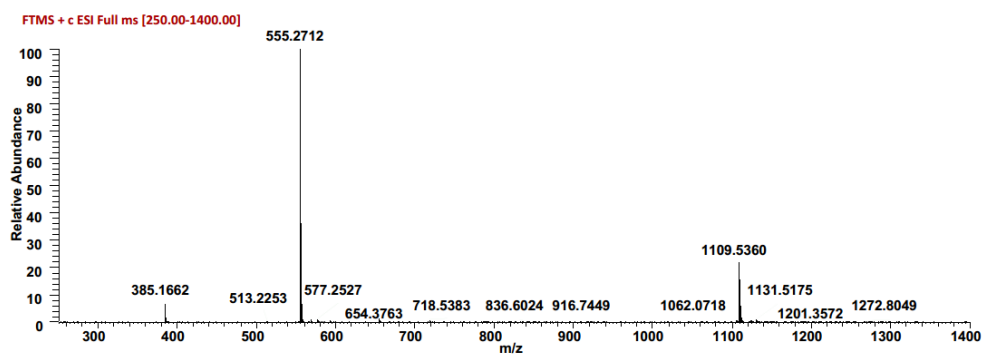**b**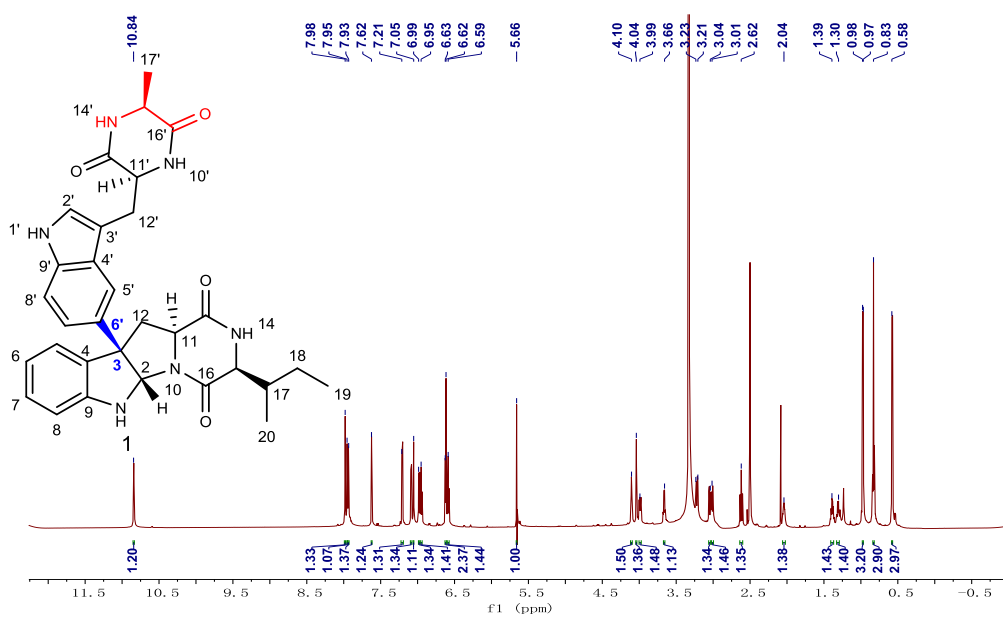**c**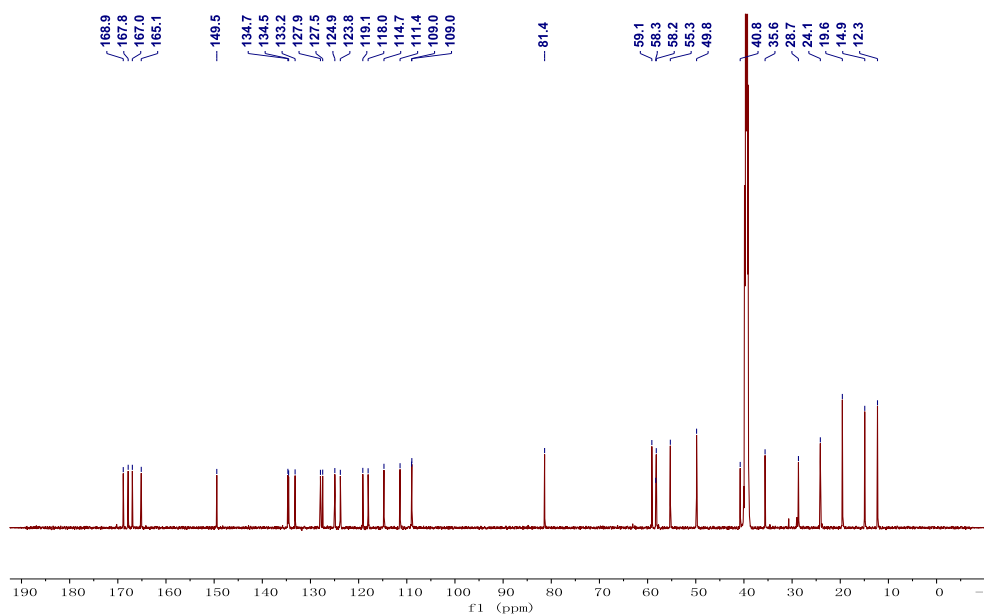

**d**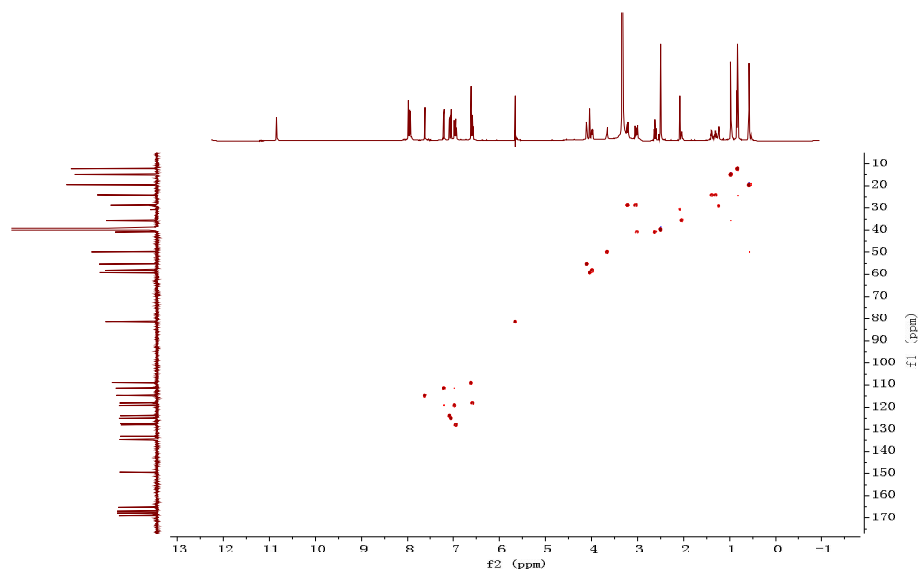**e**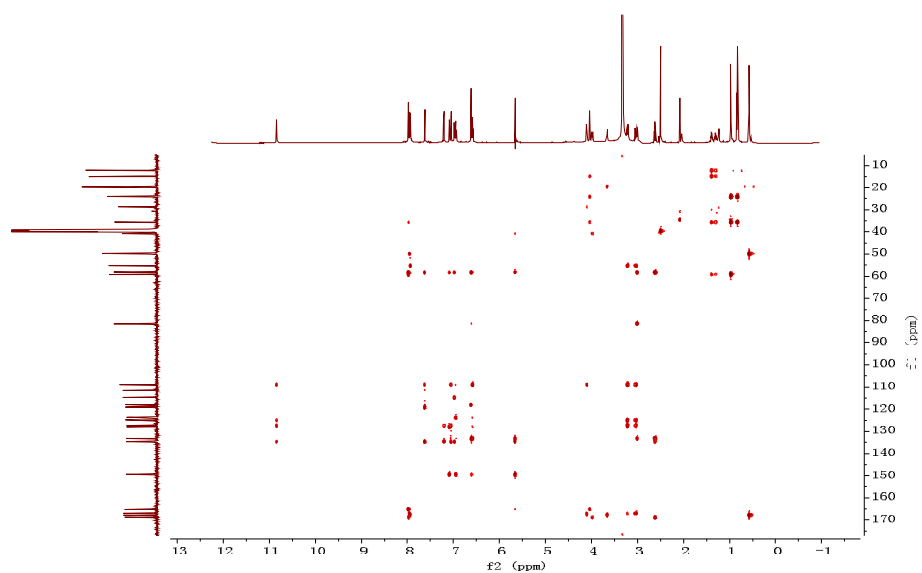**f**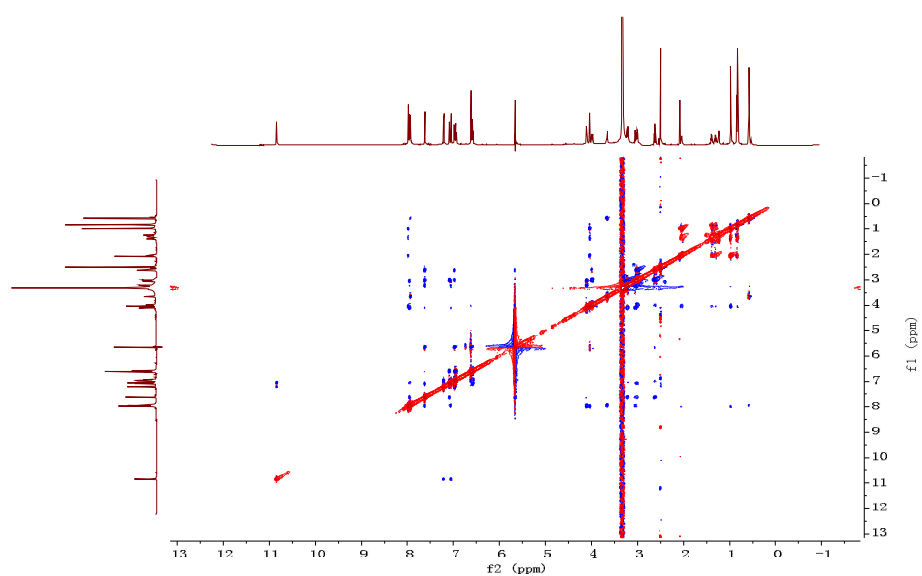

**Supplementary Figure. 16. Spectra of compound NAS-4** (a) HRESIMS of compound of NAS-4 (b)  $^1\text{H}$  NMR of compound of NAS-4 (c)  $^{13}\text{C}$  NMR of compound of NAS-4 (d) HSQC of compound of NAS-4 (e) HMBC of compound of NAS-4 (f) ROSEY of compound of NAS-4

**a**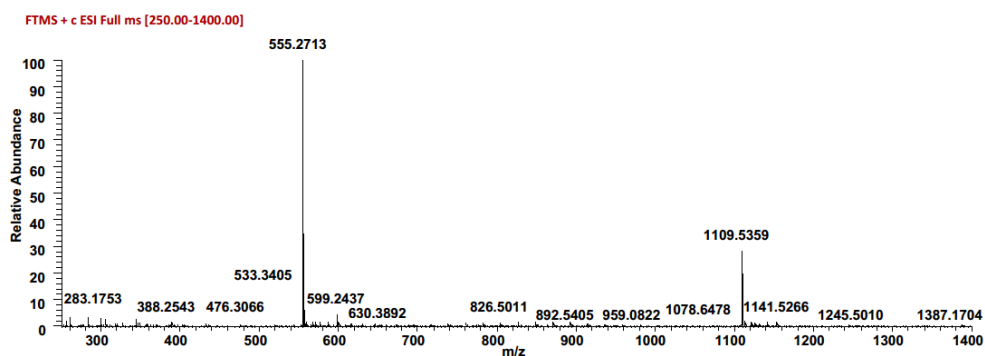**b**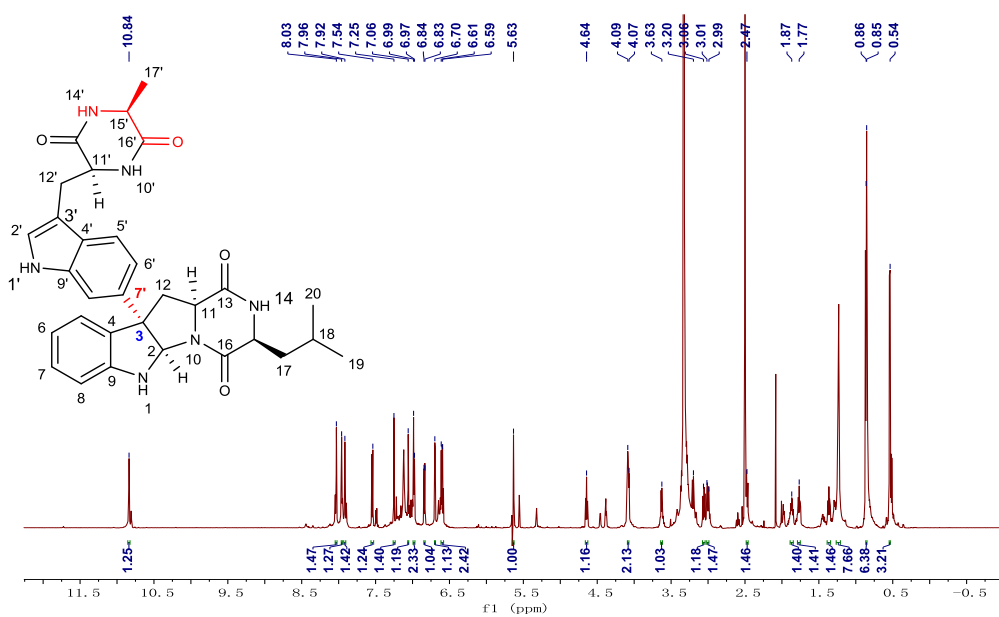**c**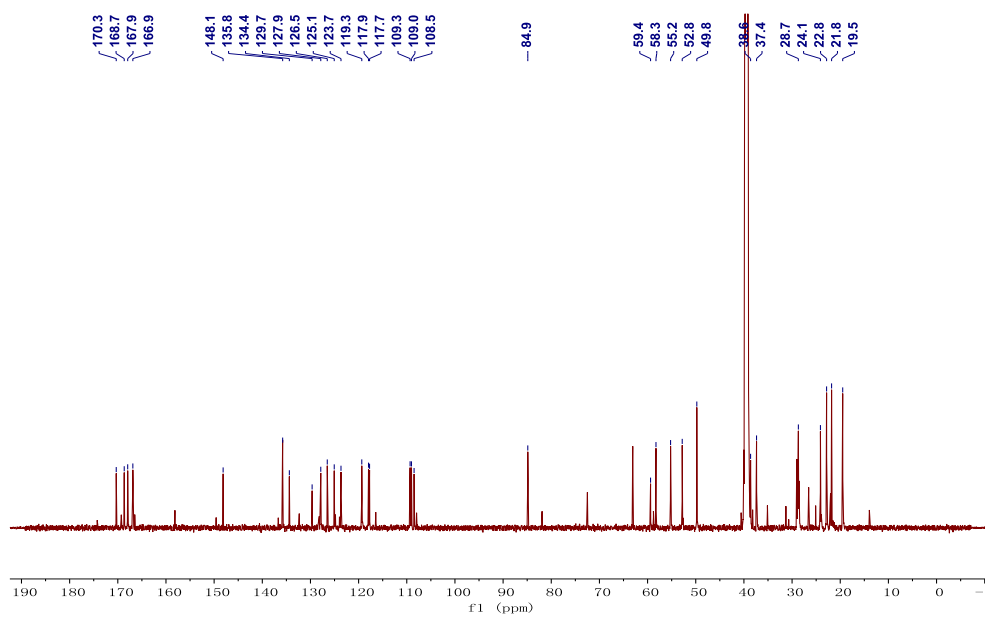

**d**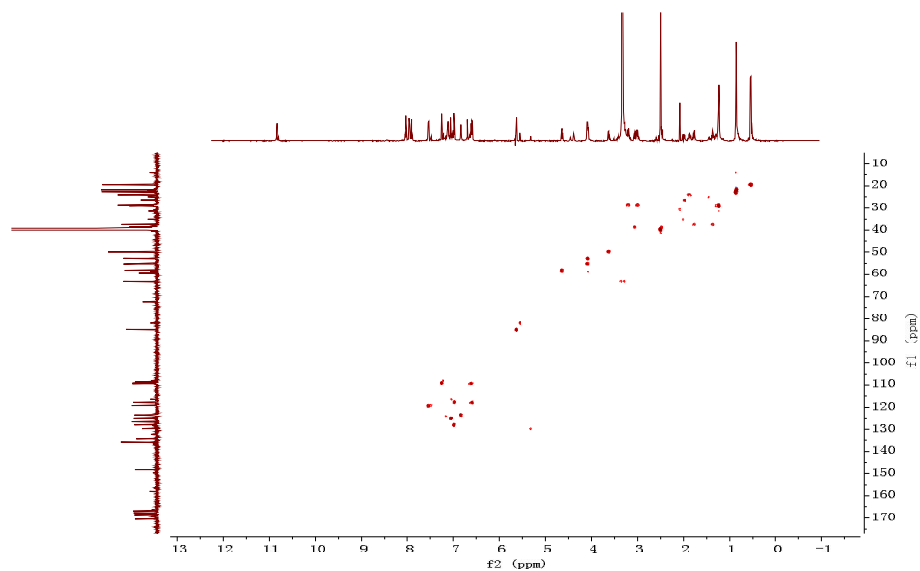**e**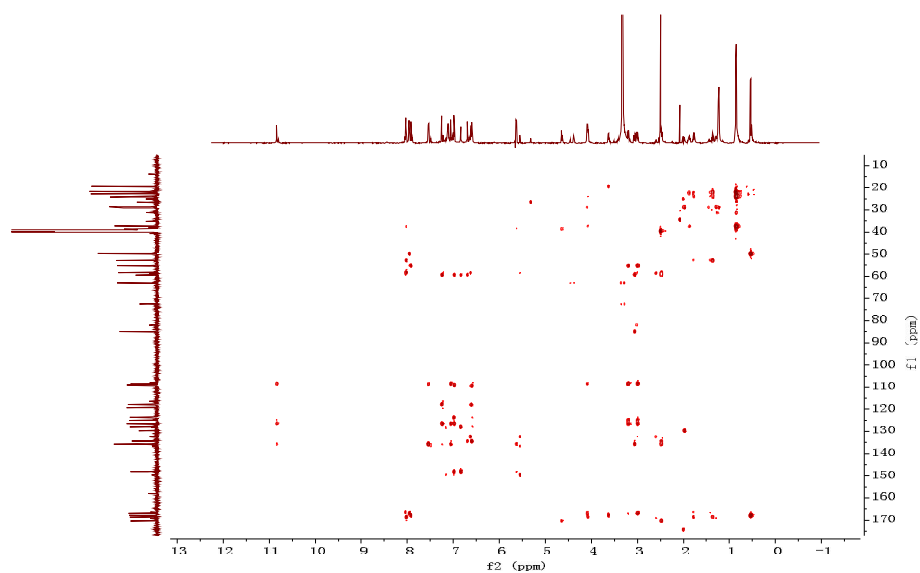**f**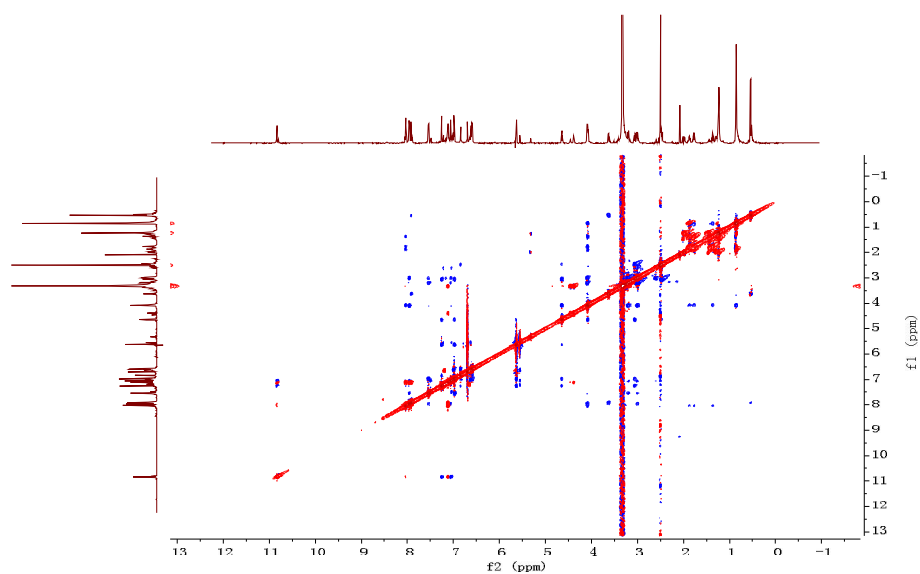

**Supplementary Figure. 17. Spectra of compound NAS-5** (a) HRESIMS of compound of NAS-5 (b)  $^1\text{H}$  NMR of compound of NAS-5 (c)  $^{13}\text{C}$  NMR of compound of NAS-5 (d) HSQC of compound of NAS-5 (e) HMBC of compound of NAS-5 (f) ROSEY of compound of NAS-5

**a**

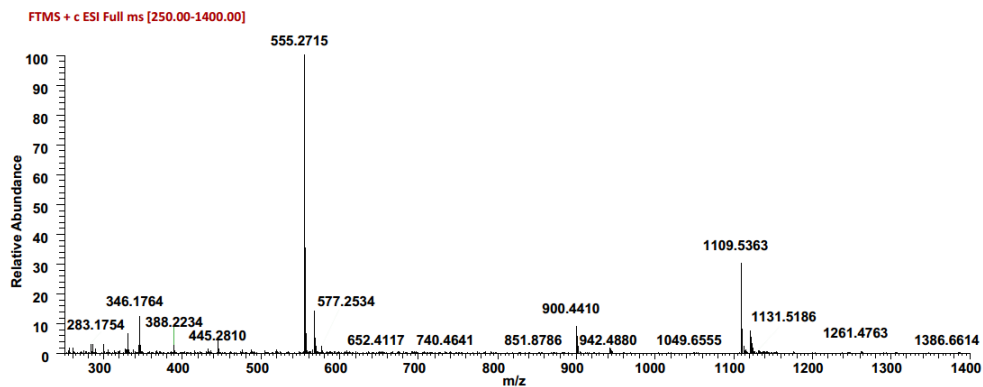

**b**

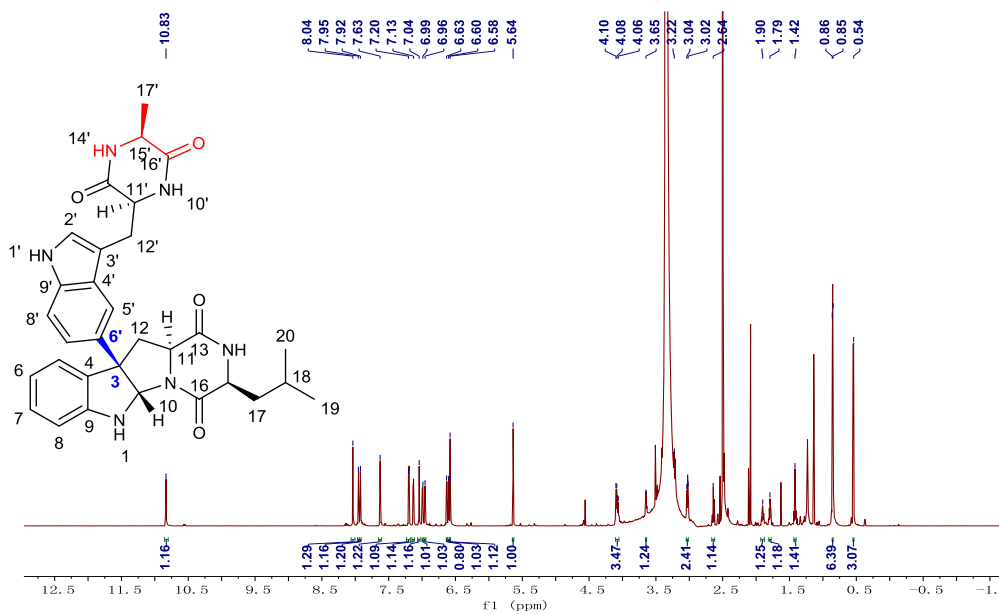

**c**

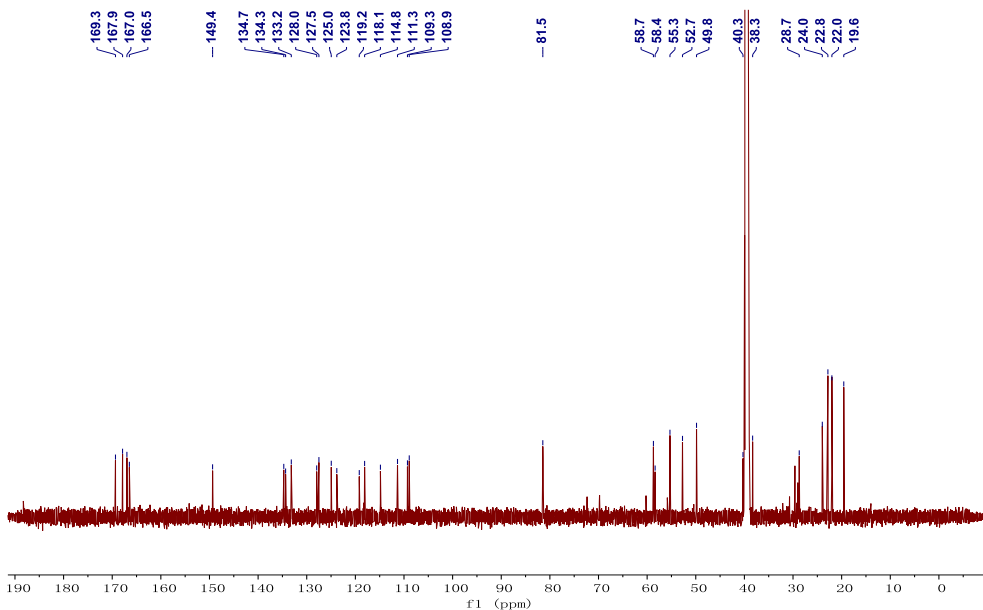

**d**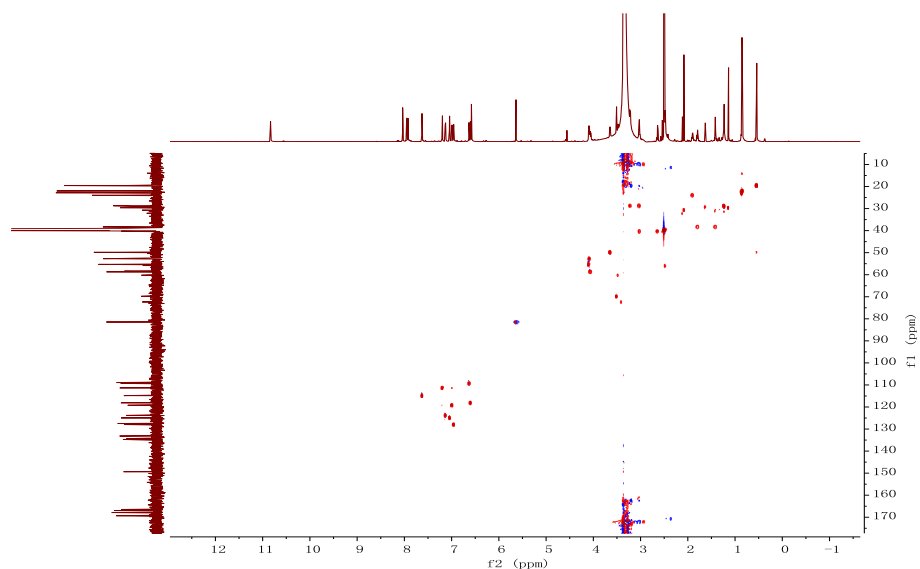**e**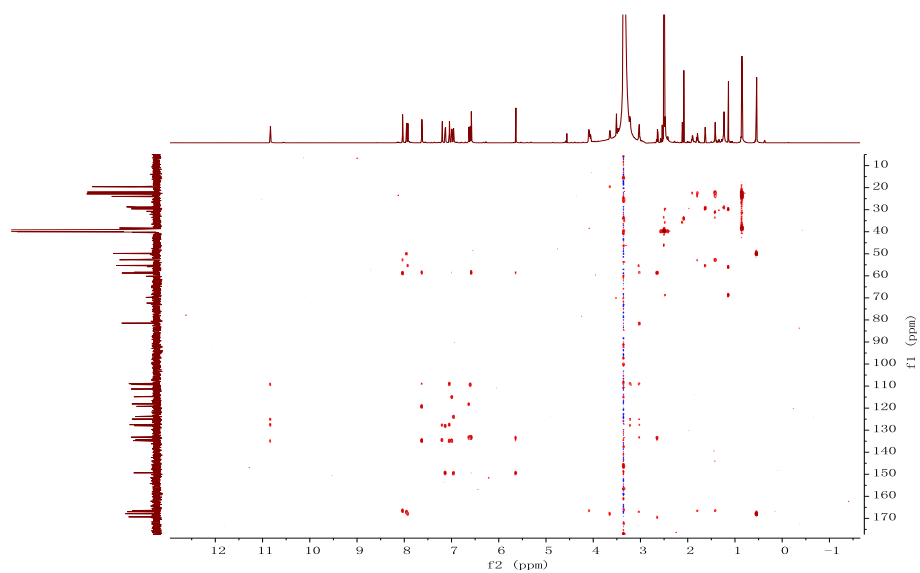**f**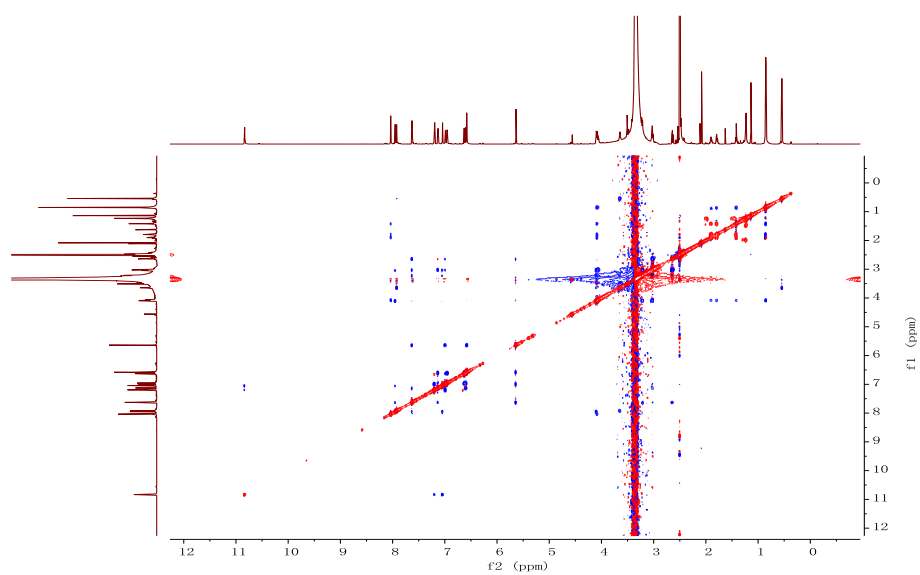

**Supplementary Figure. 18. Spectra of compound NAS-6** (a) HRESIMS of compound of NAS-6 (b)  $^1\text{H}$  NMR of compound of NAS-6 (c)  $^{13}\text{C}$  NMR of compound of NAS-6 (d) HSQC of compound of NAS-6 (e) HMBC of compound of NAS-6 (f) ROSEY of compound of NAS-6



**a**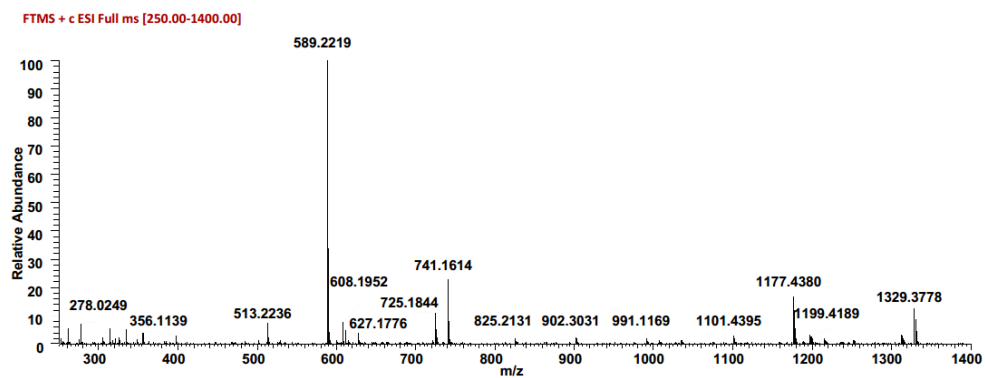**b**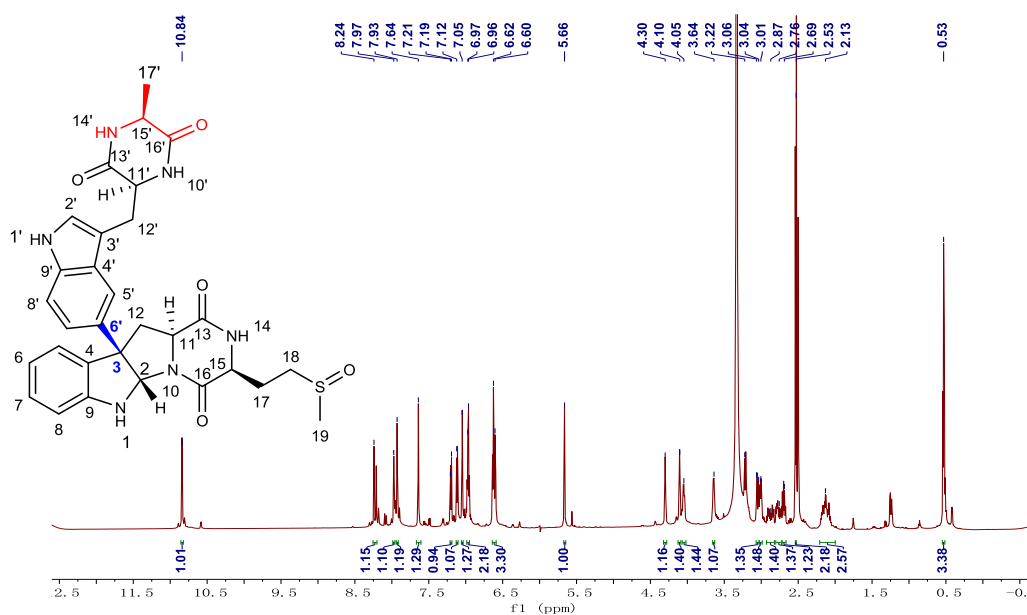**c**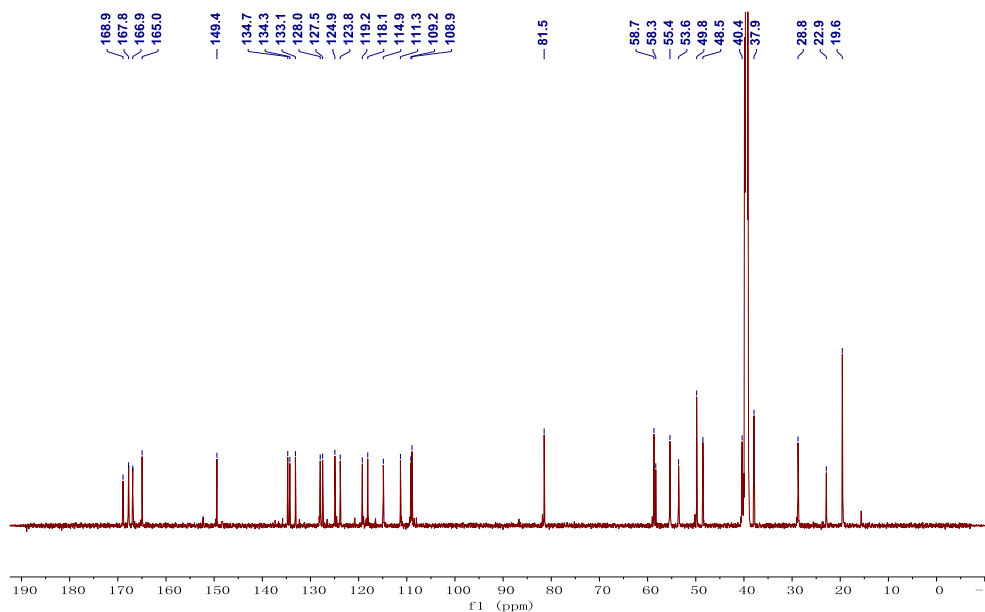

**d**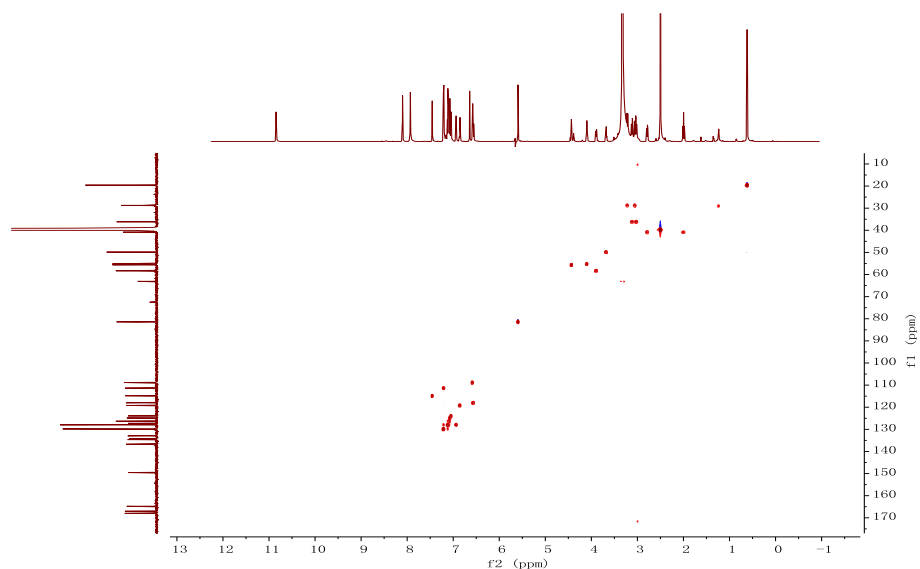**e**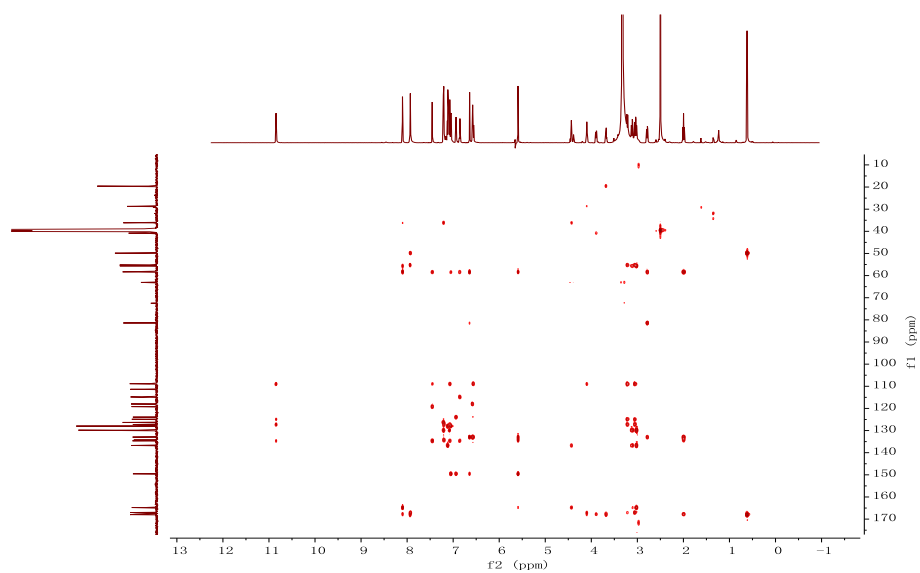**f**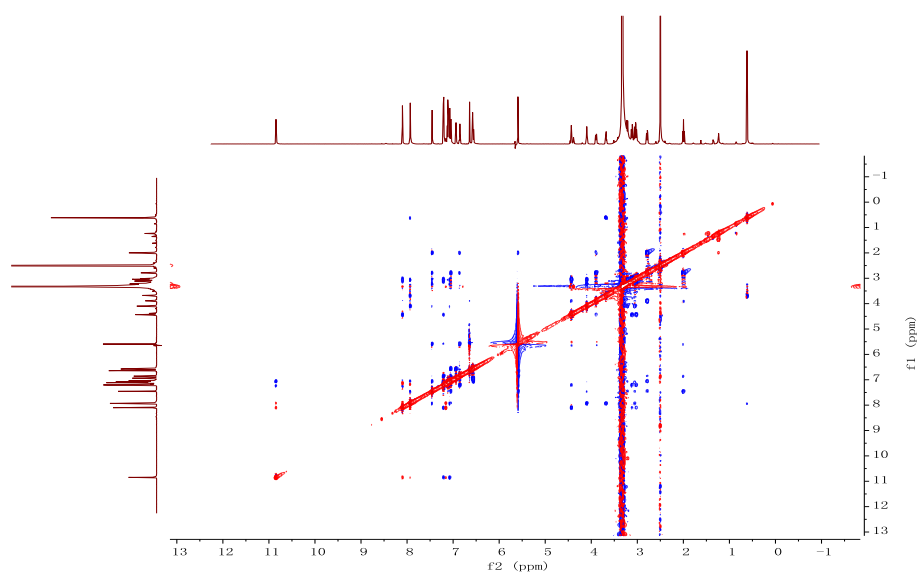

**Supplementary Figure. 19. Spectra of compound NAS-7** (a) HRESIMS of compound of NAS-7 (b)  $^1\text{H}$  NMR of compound of NAS-7 (c)  $^{13}\text{C}$  NMR of compound of NAS-7 (d) HSQC of compound of NAS-7 (e) HMBC of compound of NAS-7 (f) ROSEY of compound of NAS-7

**a**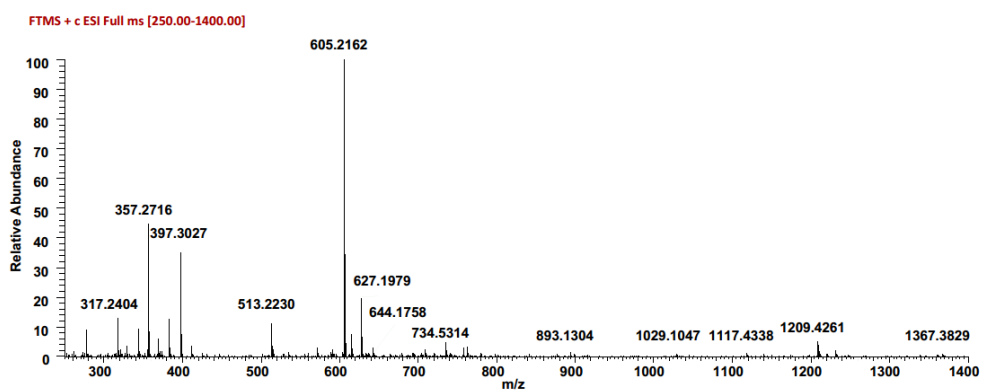**b**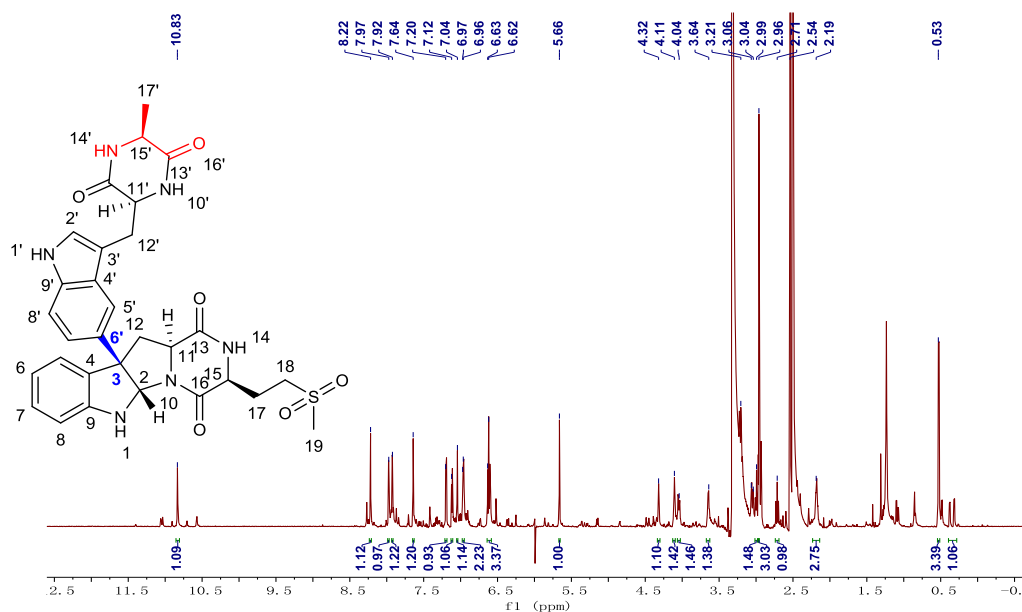**c**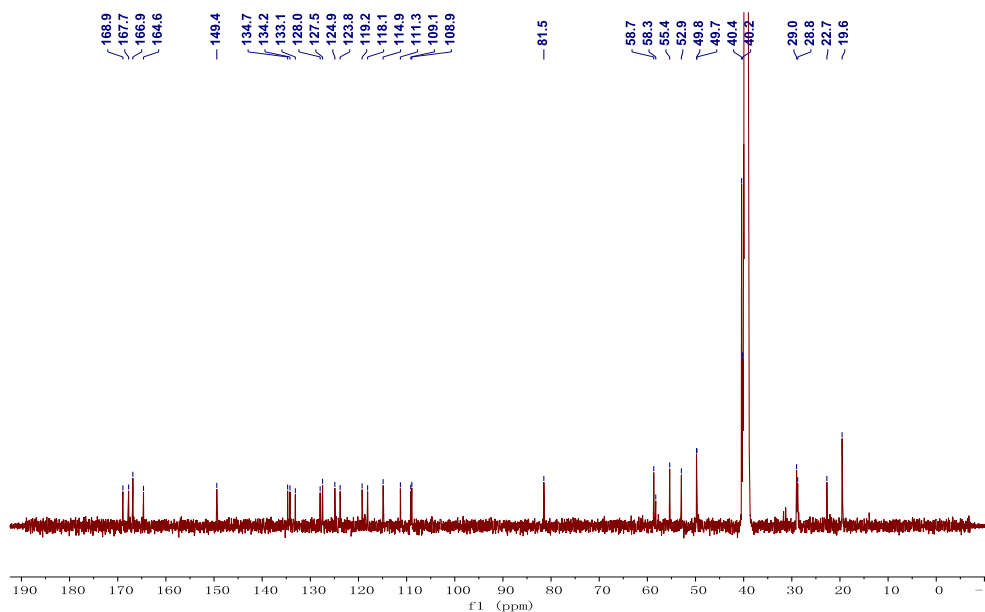

**d**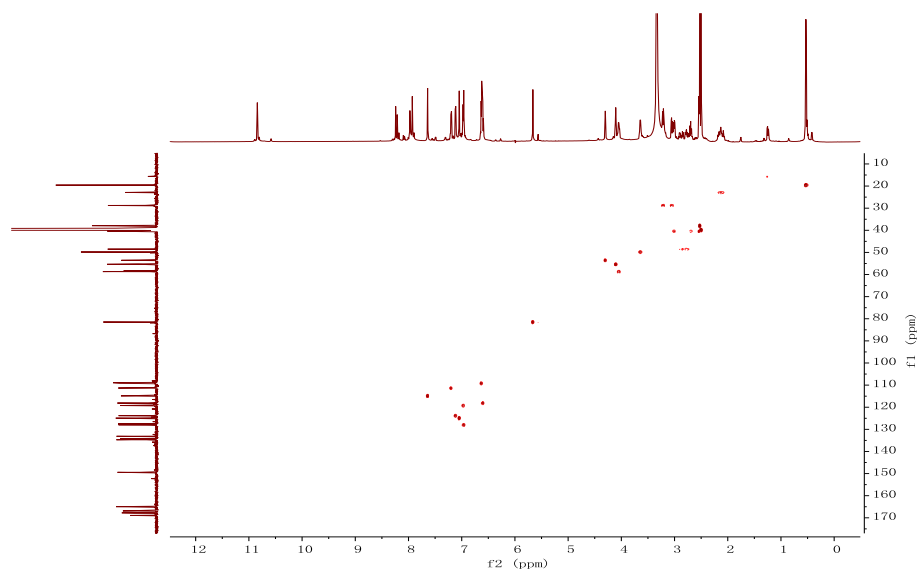**e**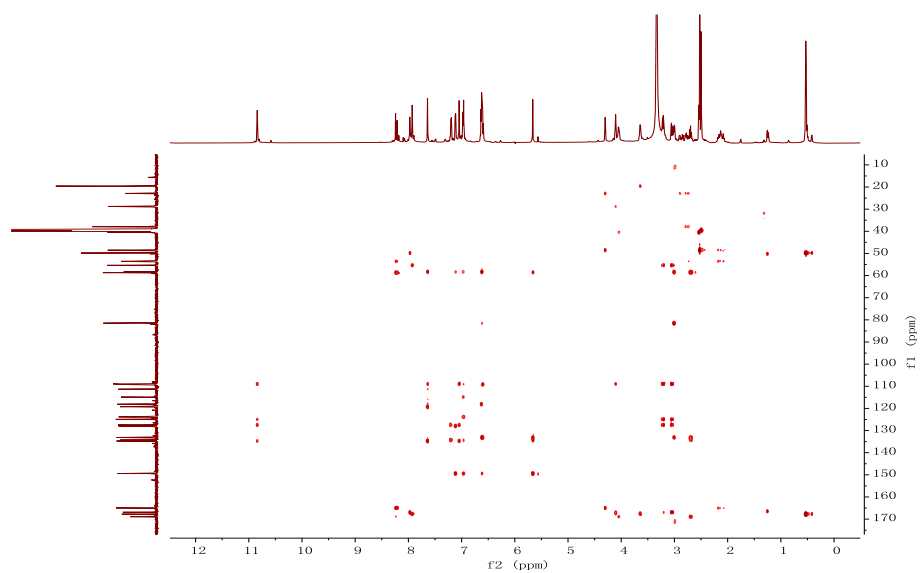**f**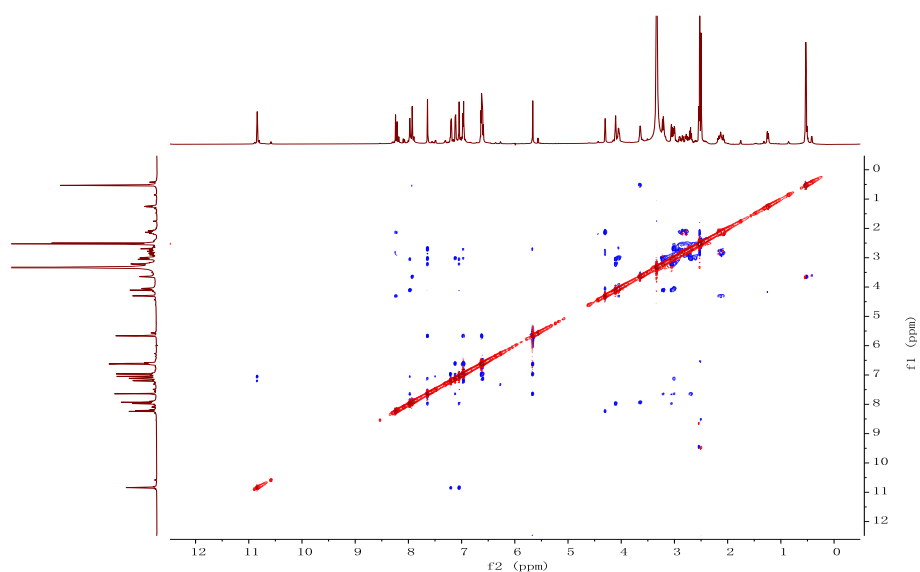

**Supplementary Figure. 20. Spectra of compound NAS-8** (a) HRESIMS of compound of NAS-8 (b)  $^1\text{H}$  NMR of compound of NAS-8 (c)  $^{13}\text{C}$  NMR of compound of NAS-8 (d) HSQC of compound of NAS-8 (e) HMBC of compound of NAS-8 (f) ROSEY of compound of NAS-8

**a**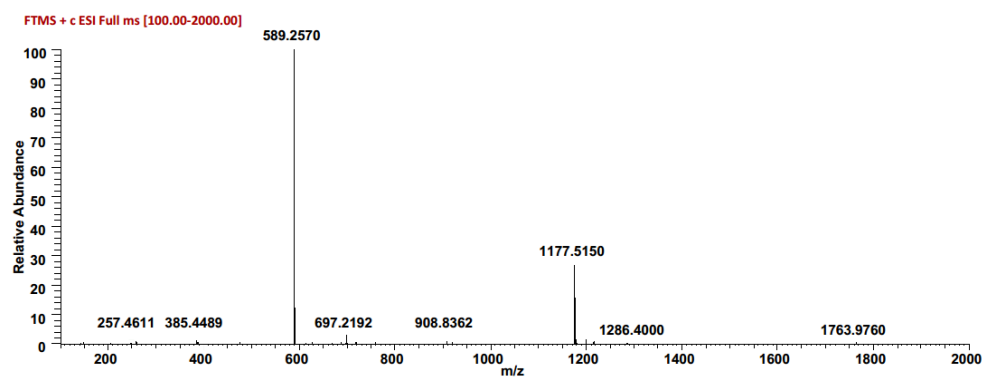**b**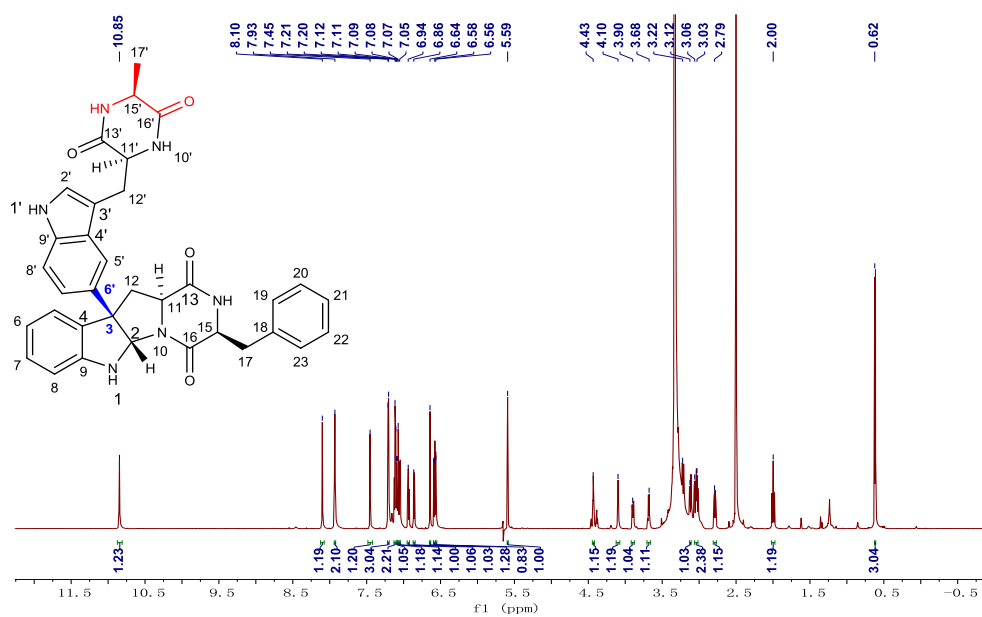**c**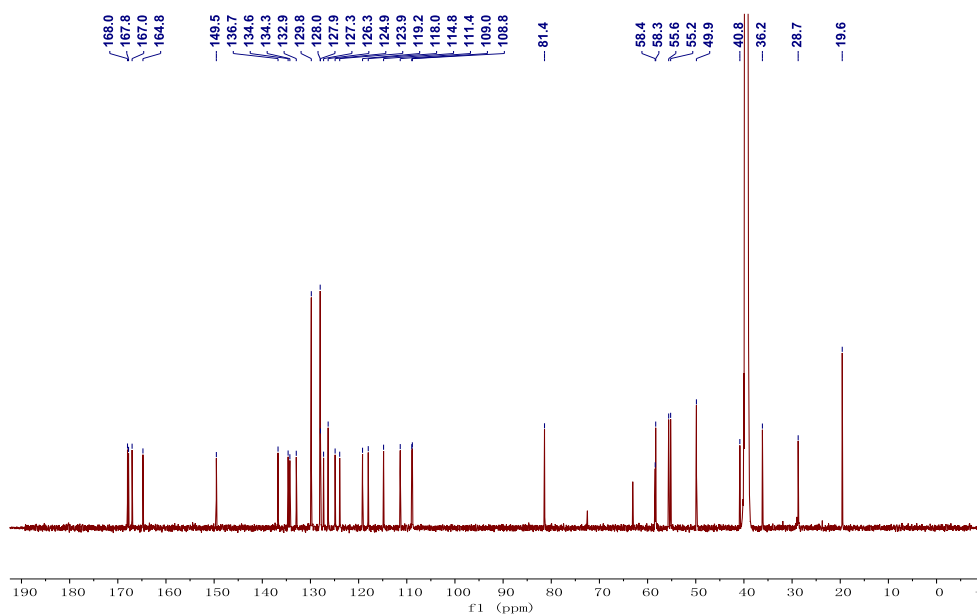

**d**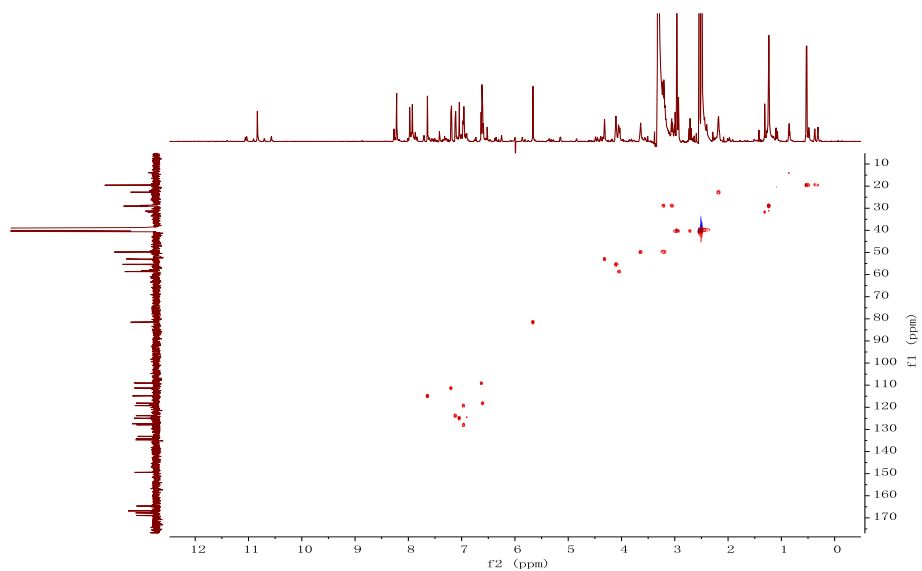**e**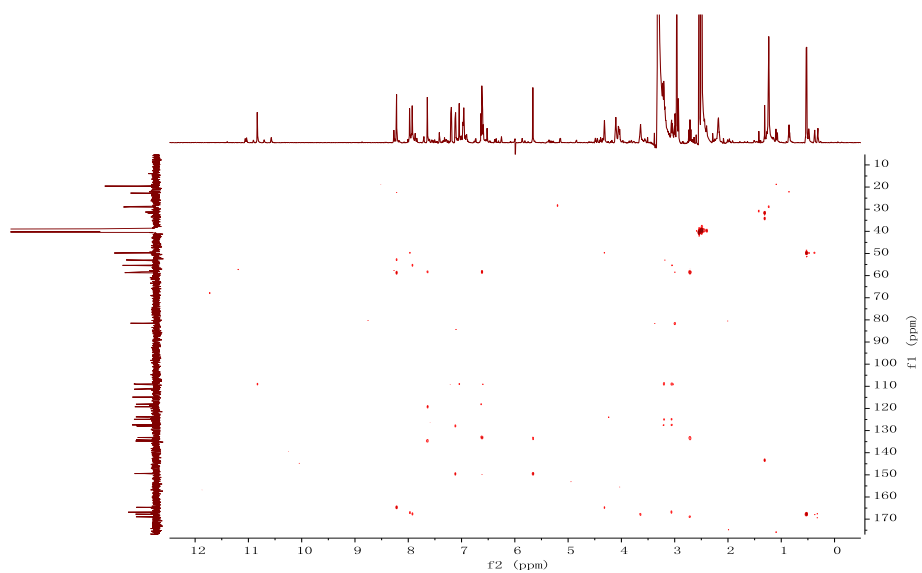**f**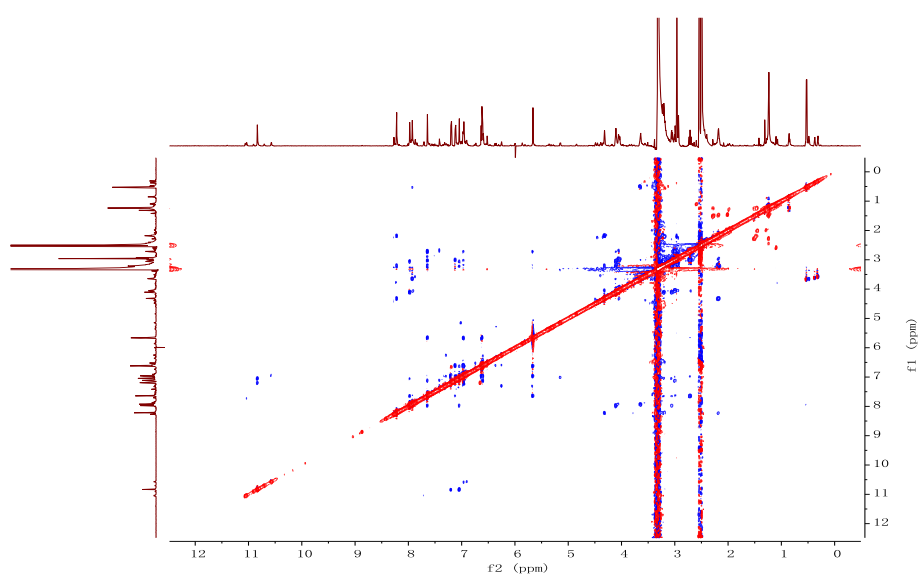

**Supplementary Figure. 21. Spectra of compound NAS-9** (a) HRESIMS of compound of NAS-9 (b)  $^1\text{H}$  NMR of compound of NAS-9 (c)  $^{13}\text{C}$  NMR of compound of NAS-9 (d) HSQC of compound of NAS-9 (e) HMBC of compound of NAS-9 (f) ROSEY of compound of NAS-9

**a**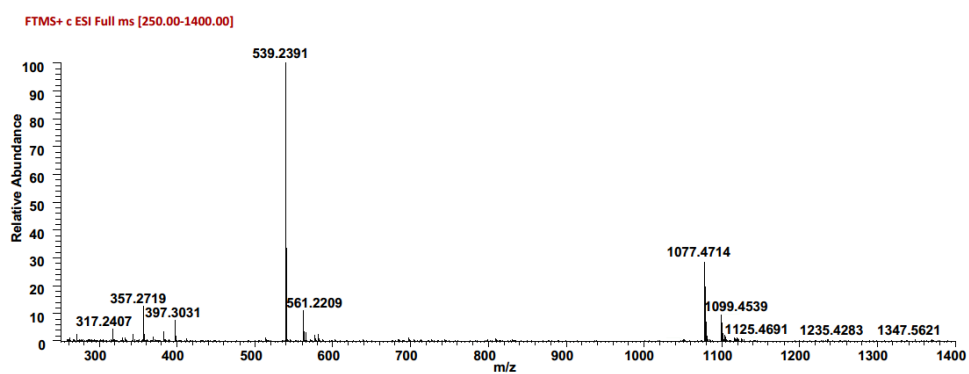**b**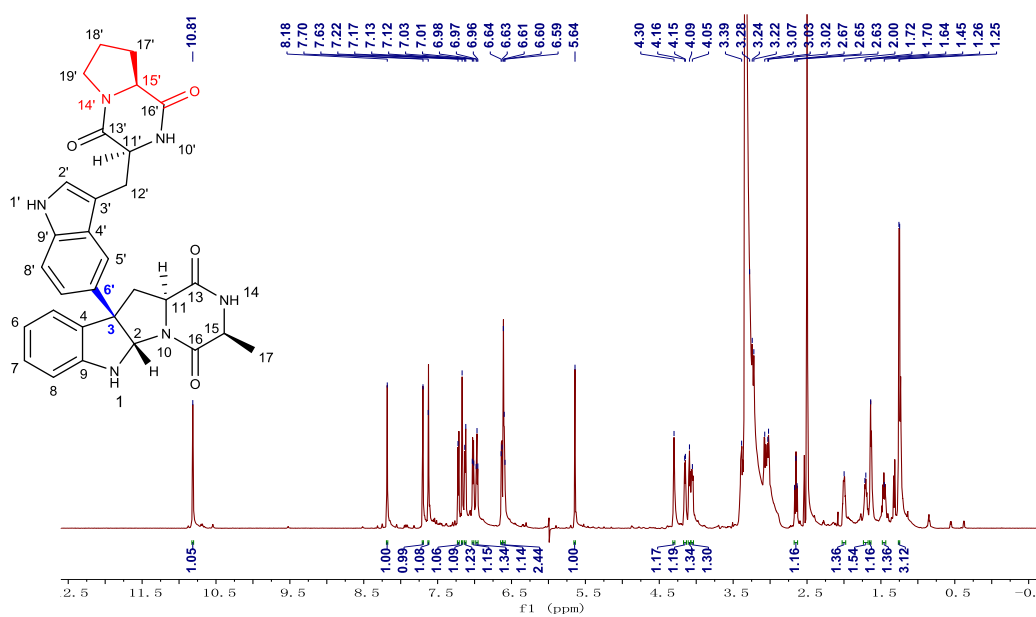**c**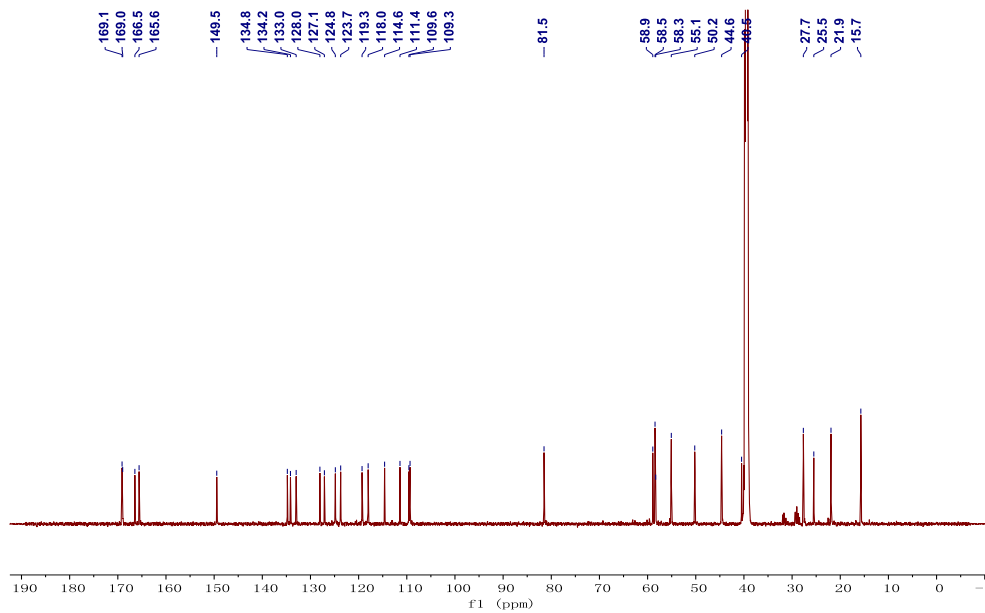

**d**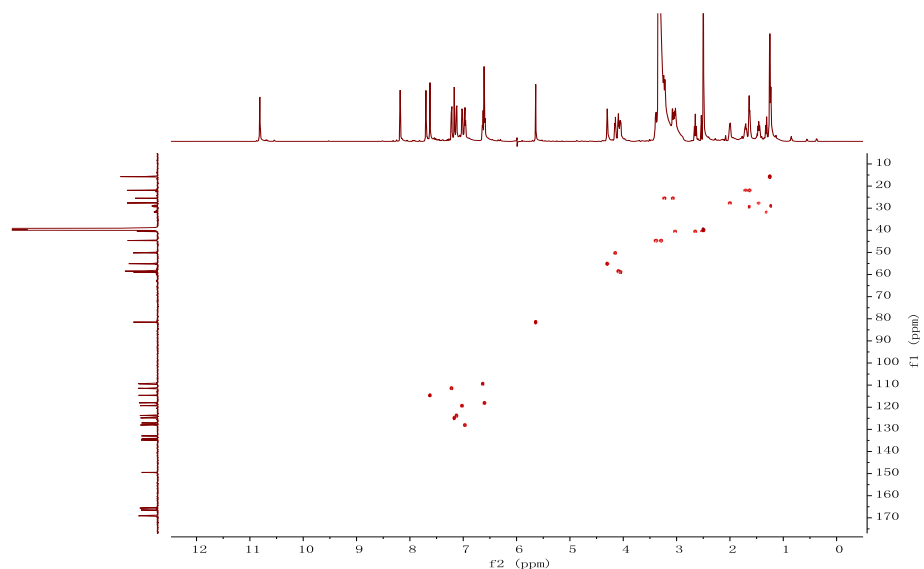**e**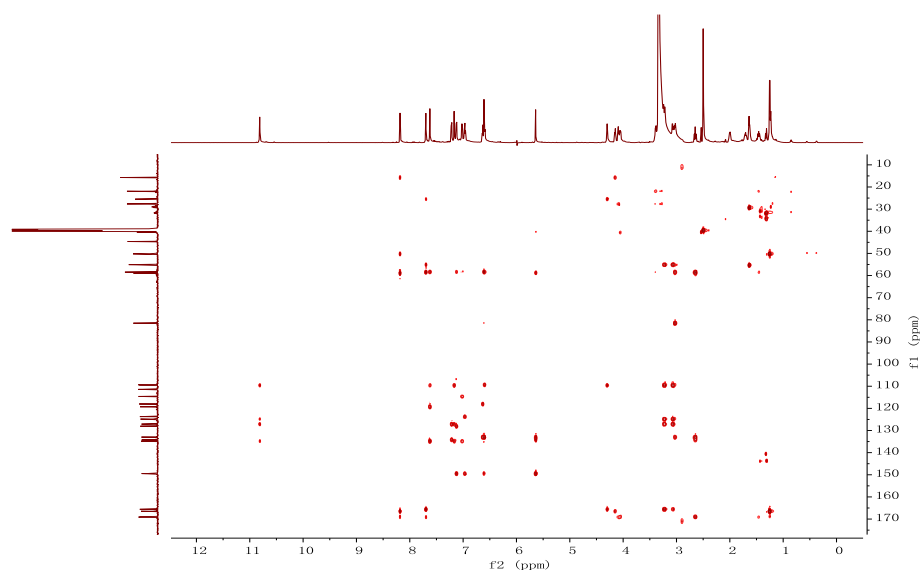**f**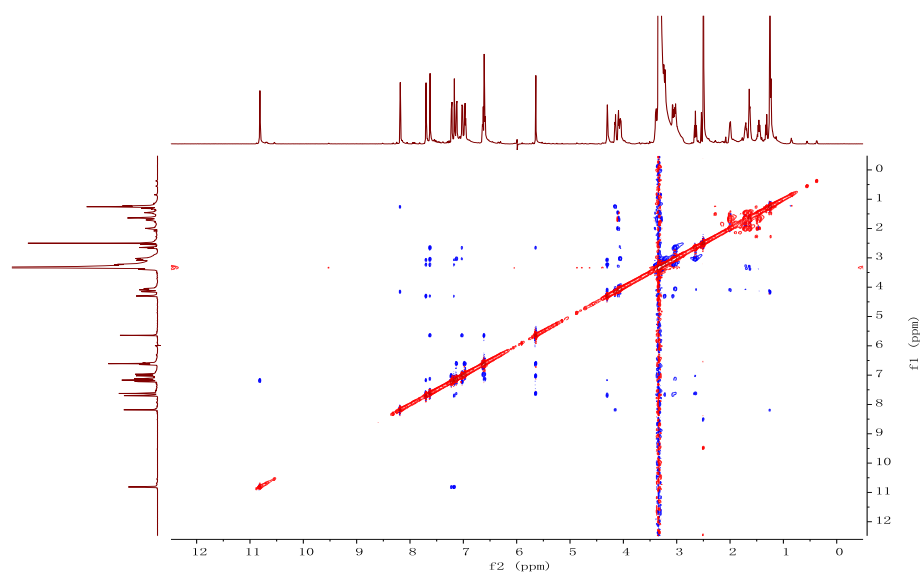

**Supplementary Figure. 22. Spectra of compound NAS-10** (a) HRESIMS of compound of NAS-10 (b)  $^1\text{H}$  NMR of compound of NAS-10 (c)  $^{13}\text{C}$  NMR of compound of NAS-10 (d) HSQC of compound of NAS-10 (e) HMBC of compound of NAS-10 (f) ROSEY of compound of NAS-10



**a**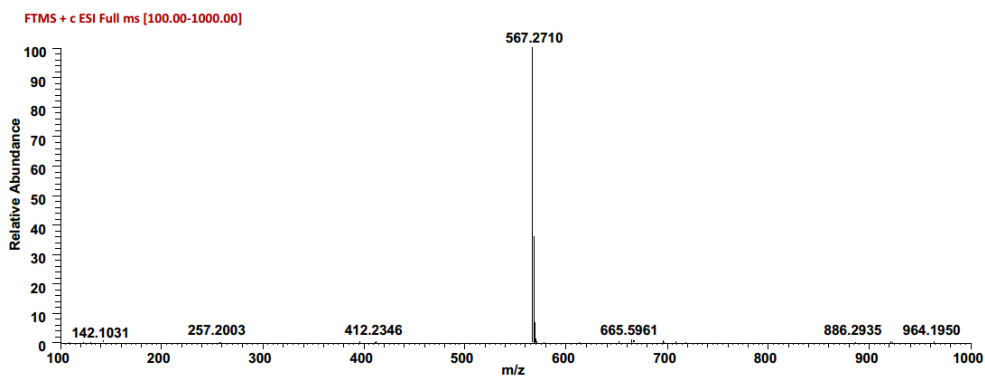**b**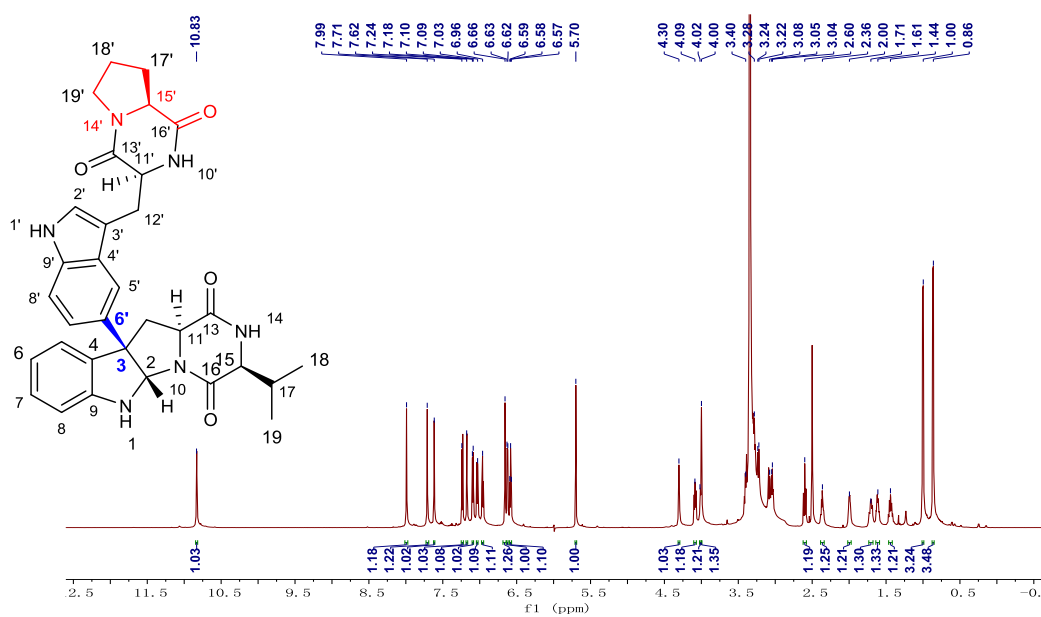**c**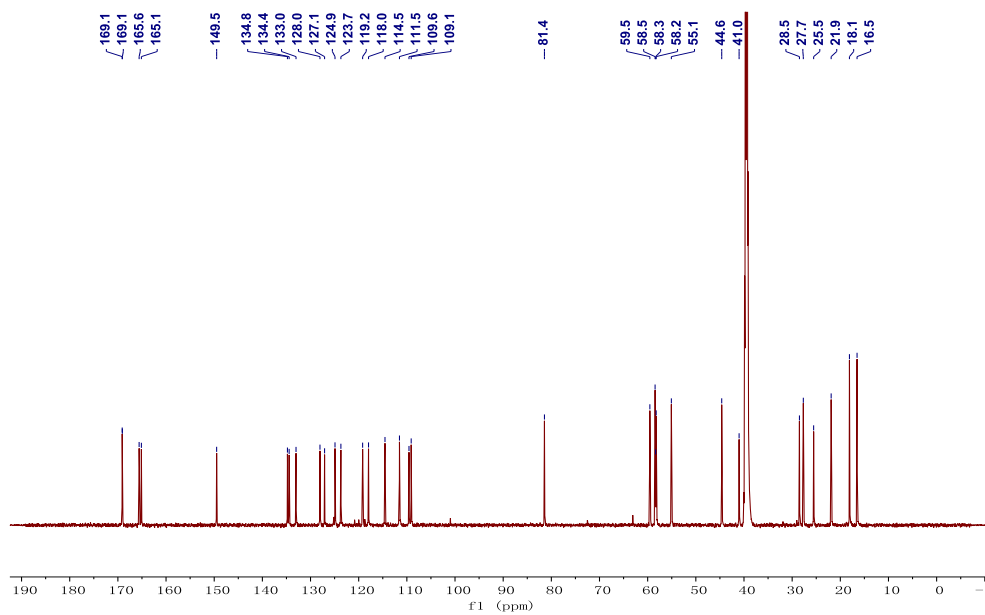

**d**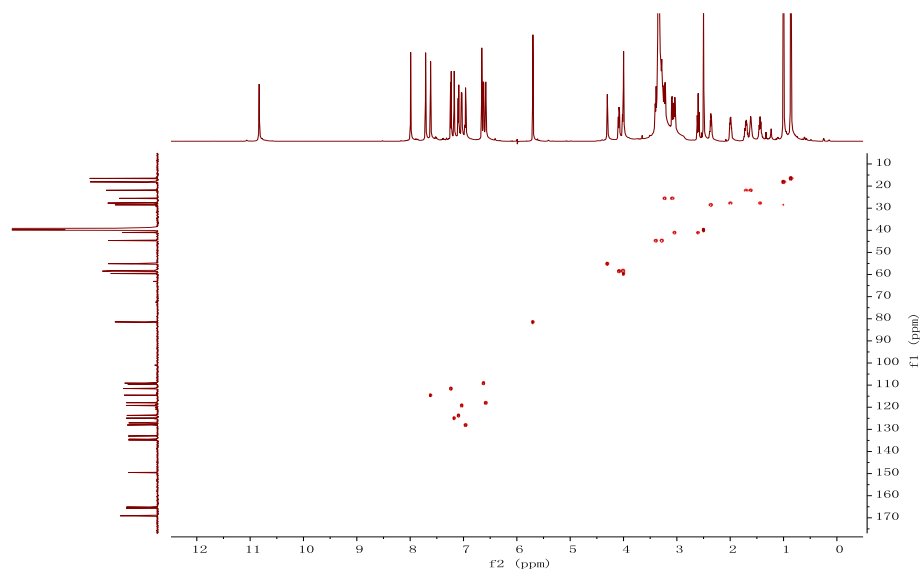**e**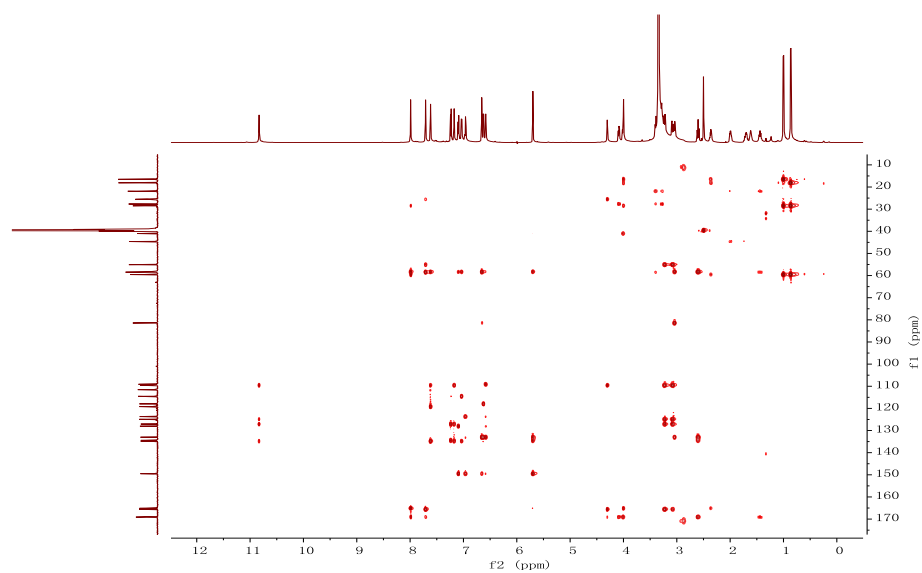**f**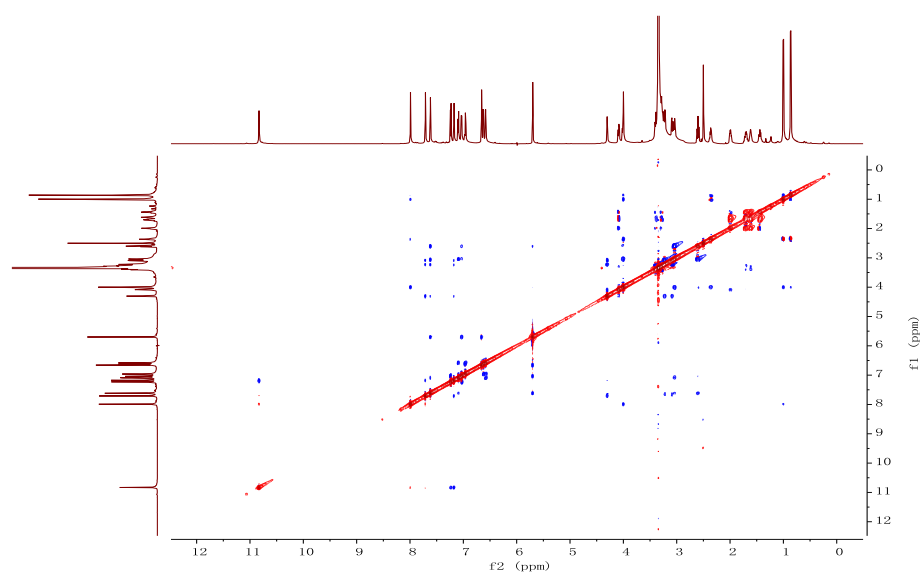

**Supplementary Figure. 23. Spectra of compound NAS-11** (a) HRESIMS of compound of NAS-11 (b)  $^1\text{H}$  NMR of compound of NAS-11 (c)  $^{13}\text{C}$  NMR of compound of NAS-11 (d) HSQC of compound of NAS-11 (e) HMBC of compound of NAS-11 (f) ROSEY of compound of NAS-11

**a**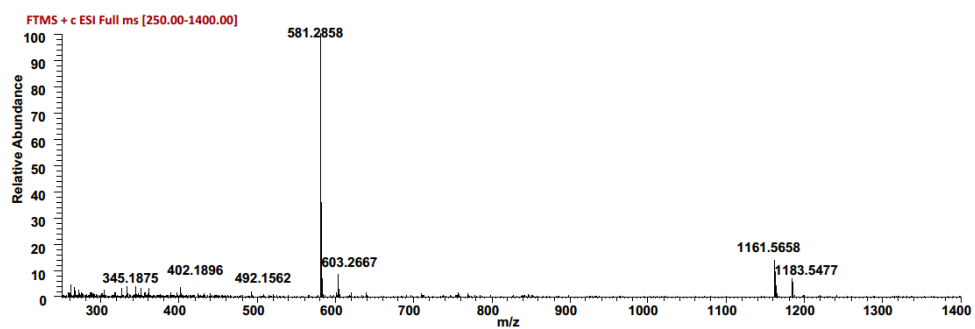**b**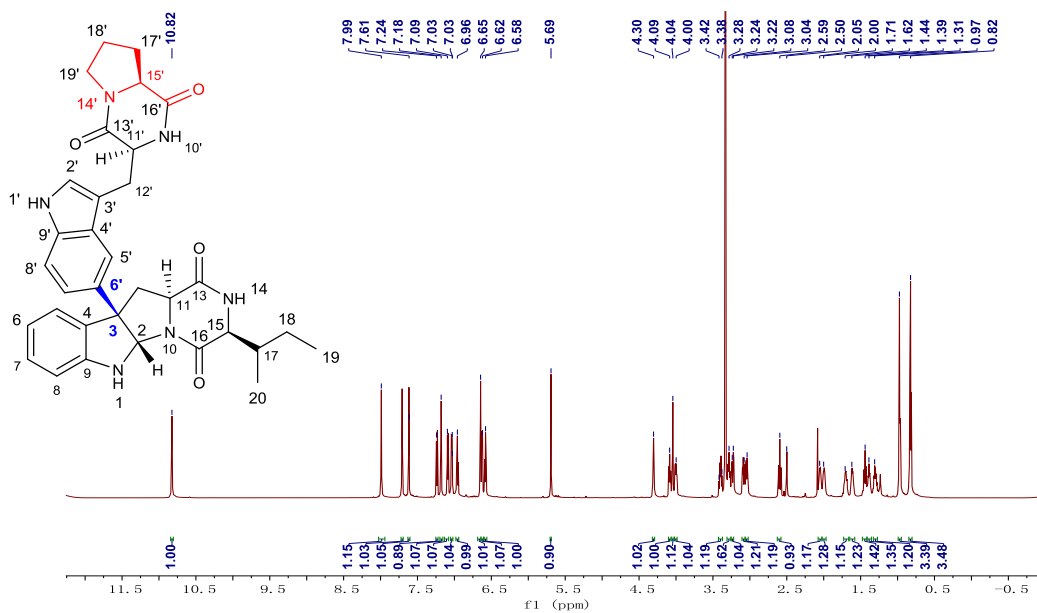**c**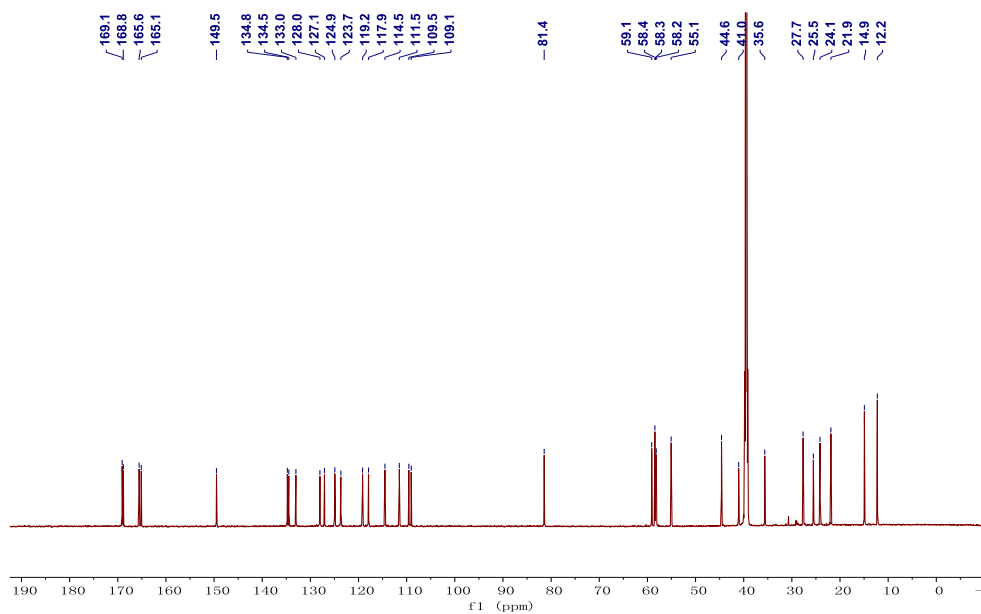

**d**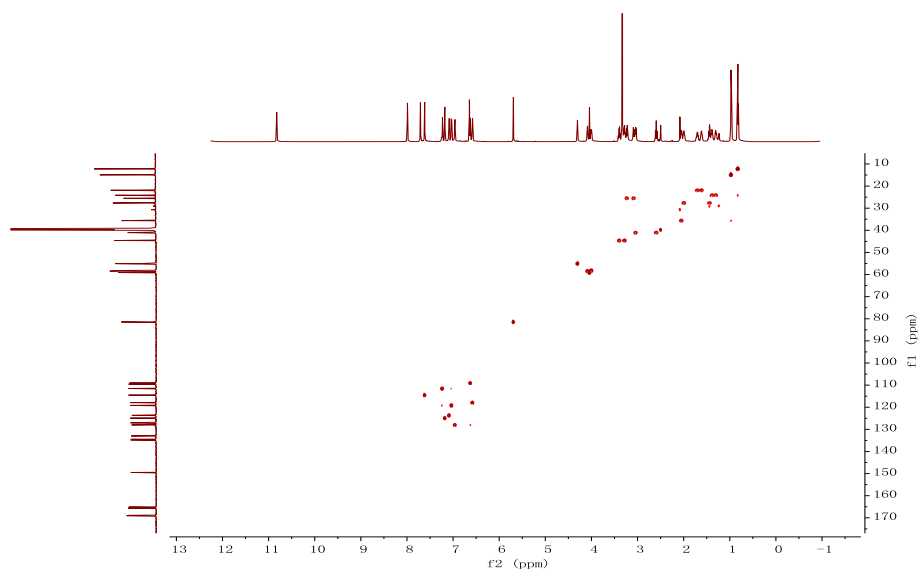**e**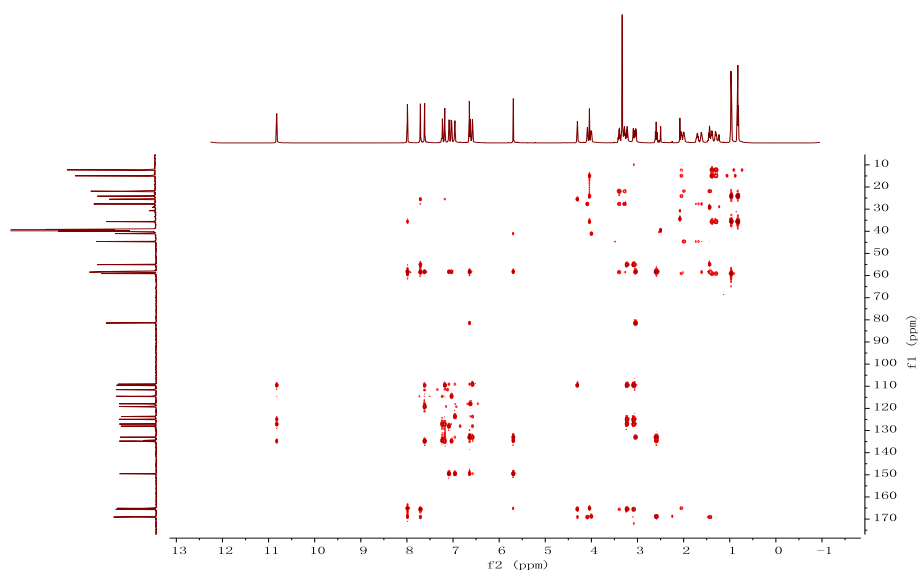**f**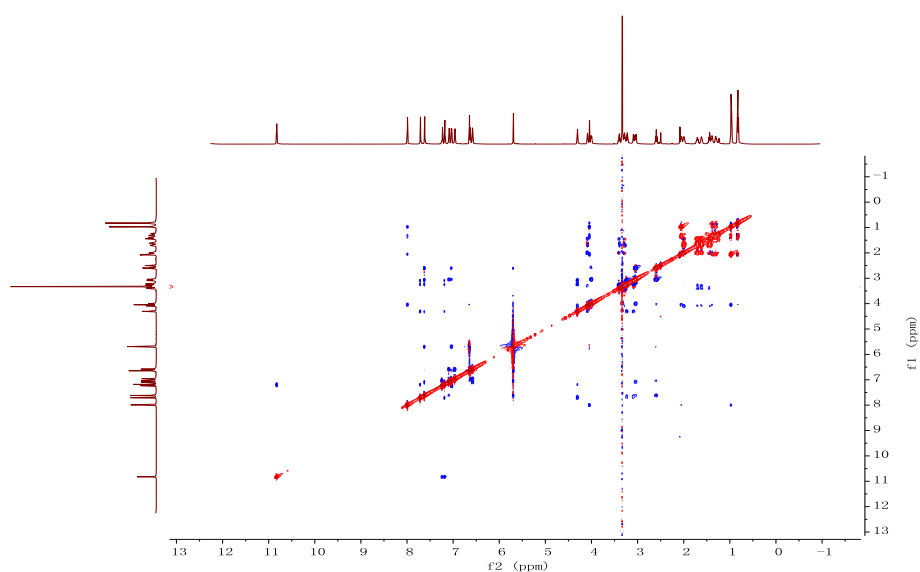

**Supplementary Figure. 24. Spectra of compound NAS-12** (a) HRESIMS of compound of NAS-12 (b)  $^1\text{H}$  NMR of compound of NAS-12 (c)  $^{13}\text{C}$  NMR of compound of NAS-11 (d) HSQC of compound of NAS-12 (e) HMBC of compound of NAS-12 (f) ROSEY of compound of NAS-12

**a**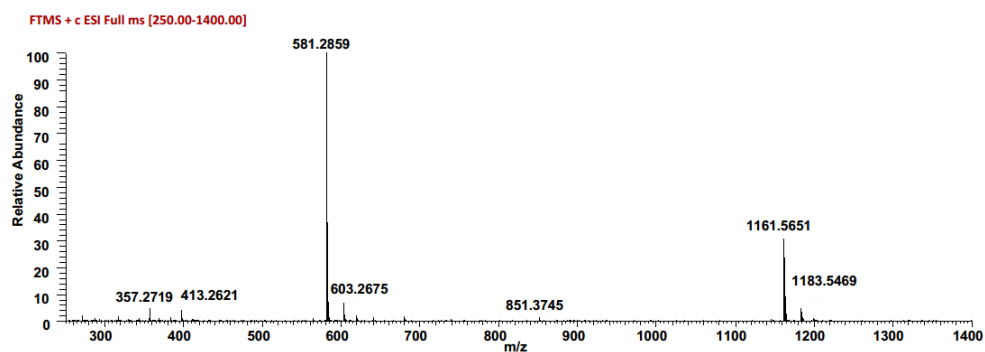**b**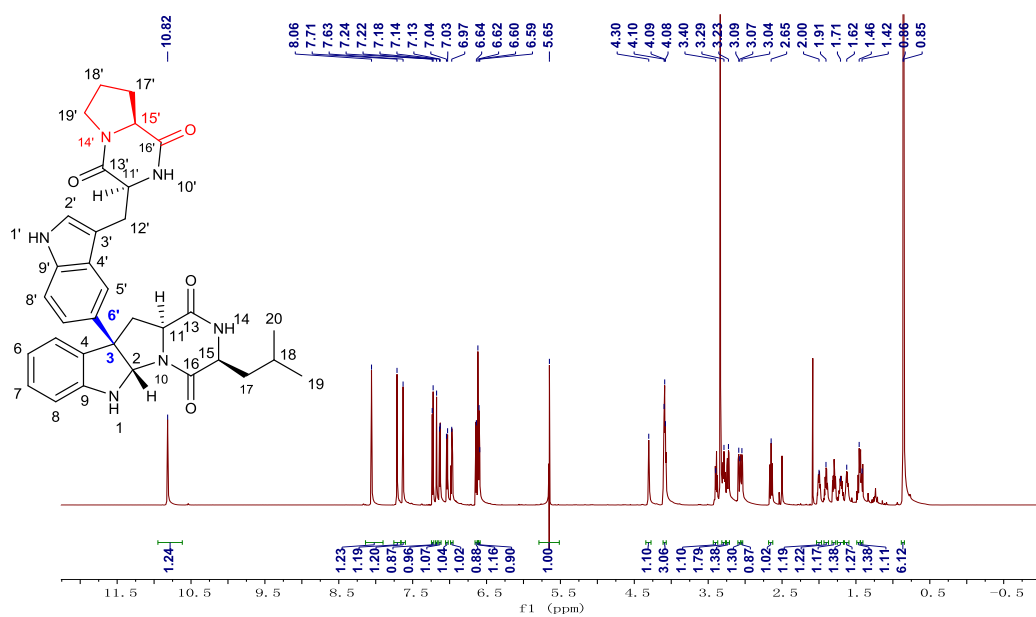**c**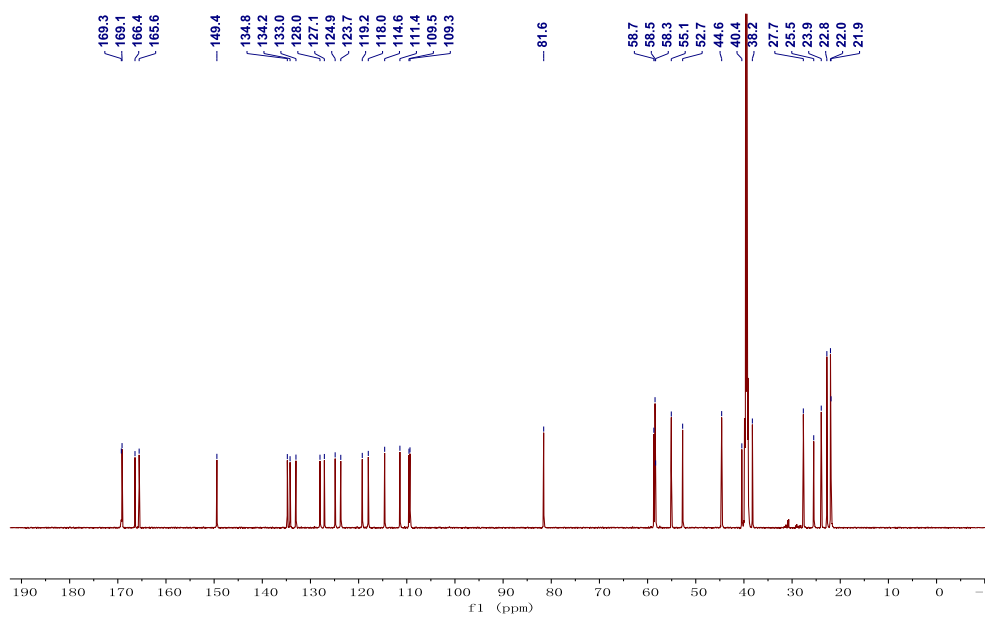

**d**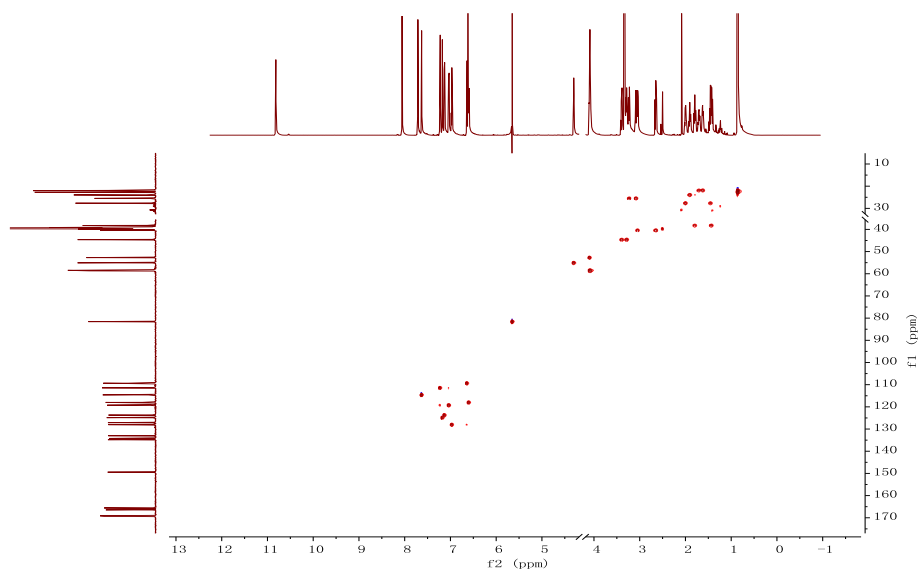**e**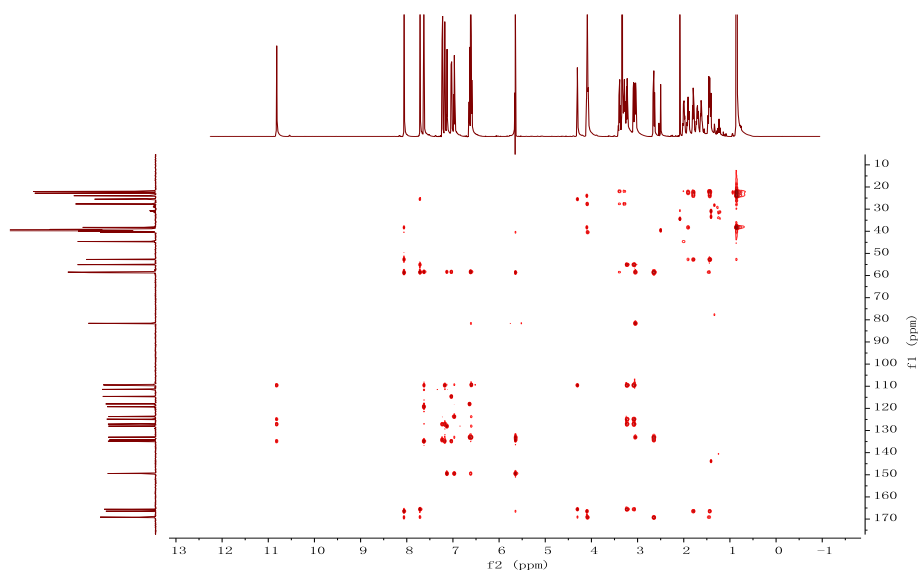**f**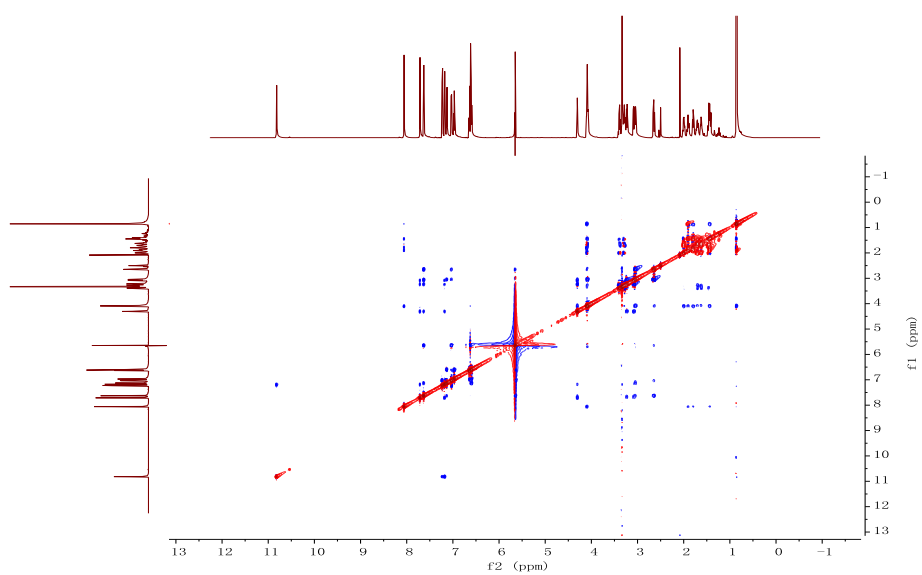

**Supplementary Figure. 25. Spectra of compound NAS-13** (a) HRESIMS of compound of NAS-13 (b)  $^1\text{H}$  NMR of compound of NAS-13 (c)  $^{13}\text{C}$  NMR of compound of NAS-13 (d) HSQC of compound of NAS-13 (e) HMBC of compound of NAS-13 (f) ROSEY of compound of NAS-13

**a**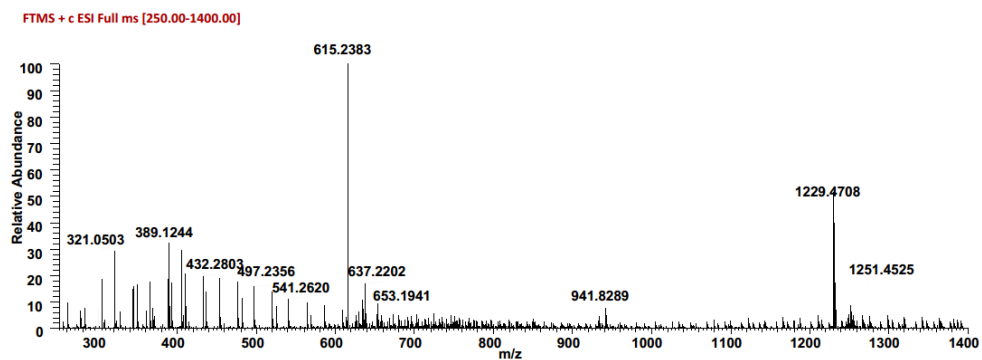**b**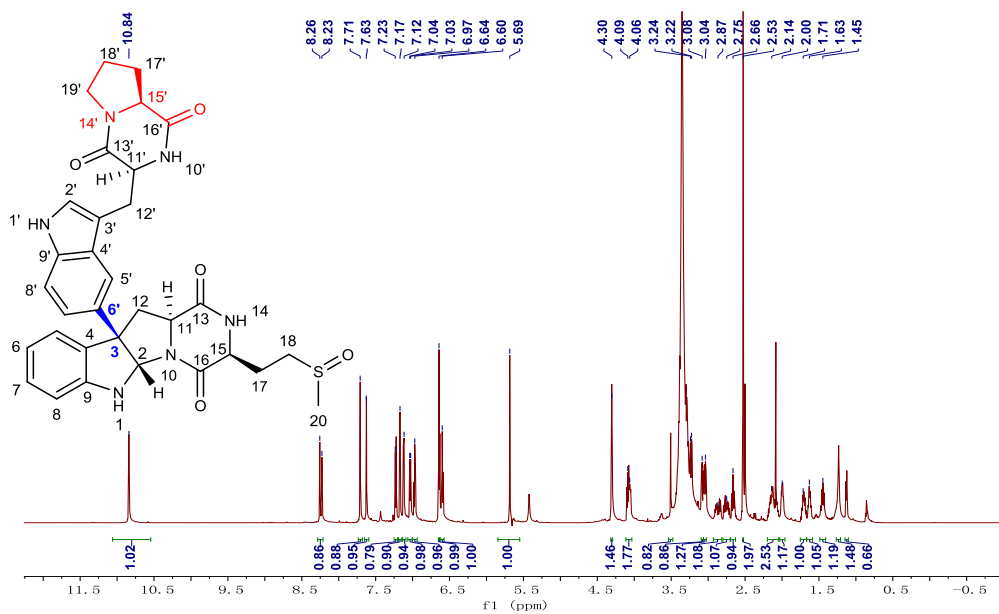**c**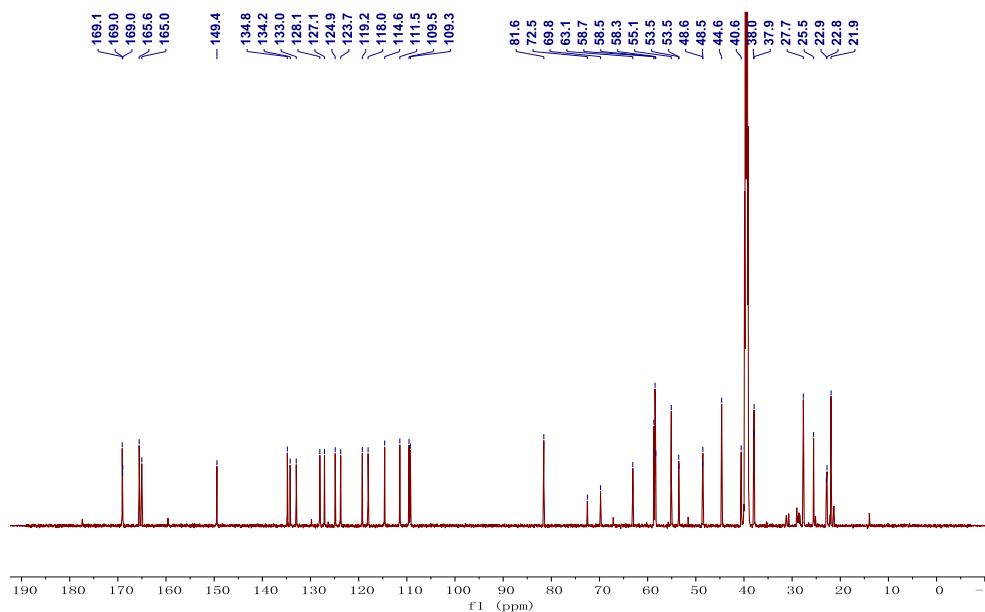

**d**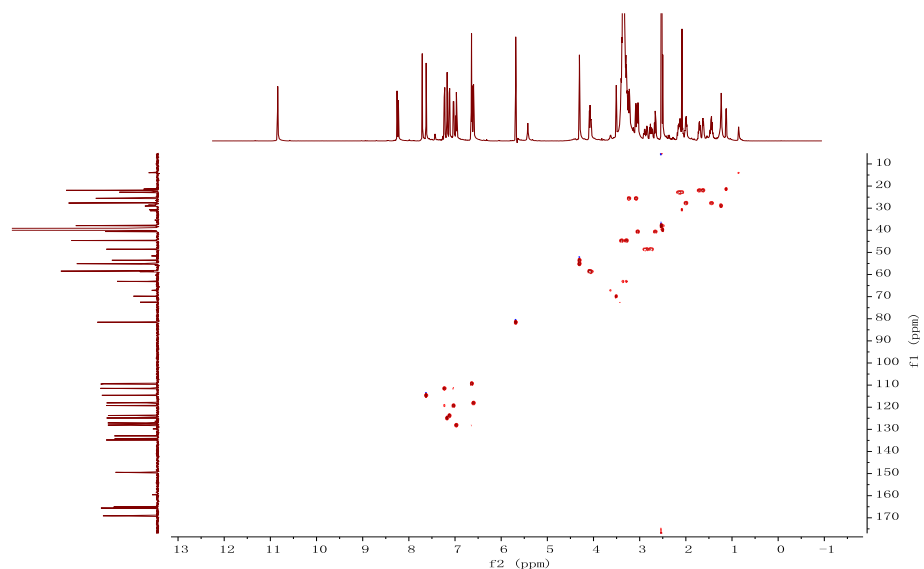**e**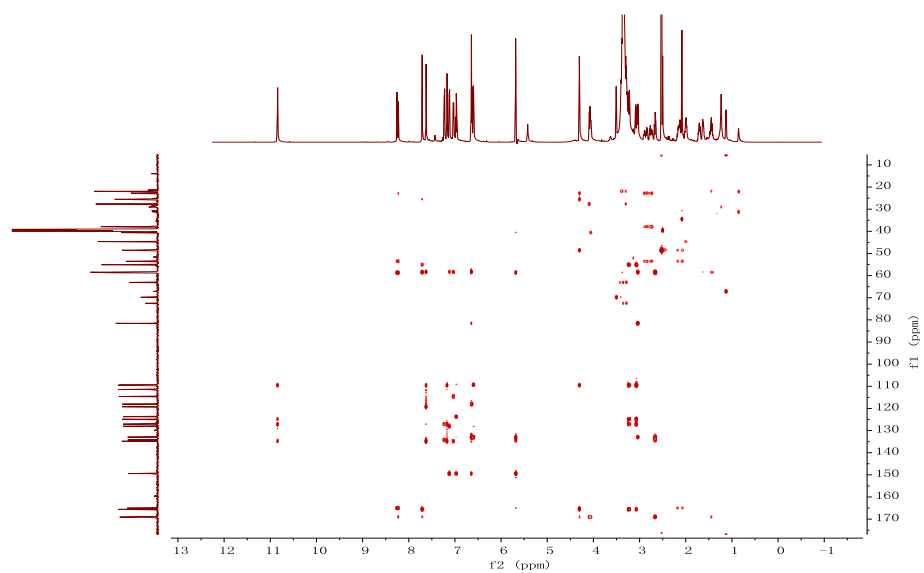**f**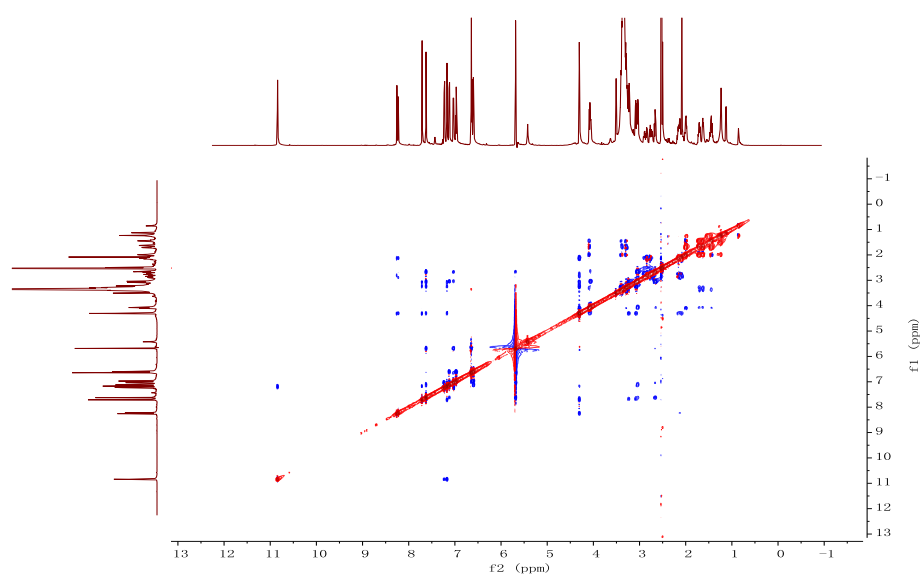

**Supplementary Figure. 26. Spectra of compound NAS-14**(a) HRESIMS of compound of NAS-14 (b)  $^1\text{H}$  NMR of compound of NAS-14 (c)  $^{13}\text{C}$  NMR of compound of NAS-14(d)HSQC of compound of NAS-14(e) HMBC of compound of NAS-14(f) ROSEY of compound of NAS-14



**a**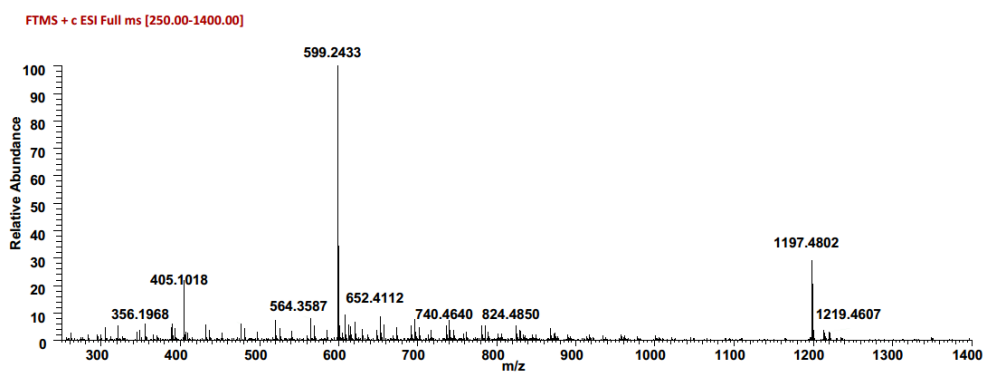**b**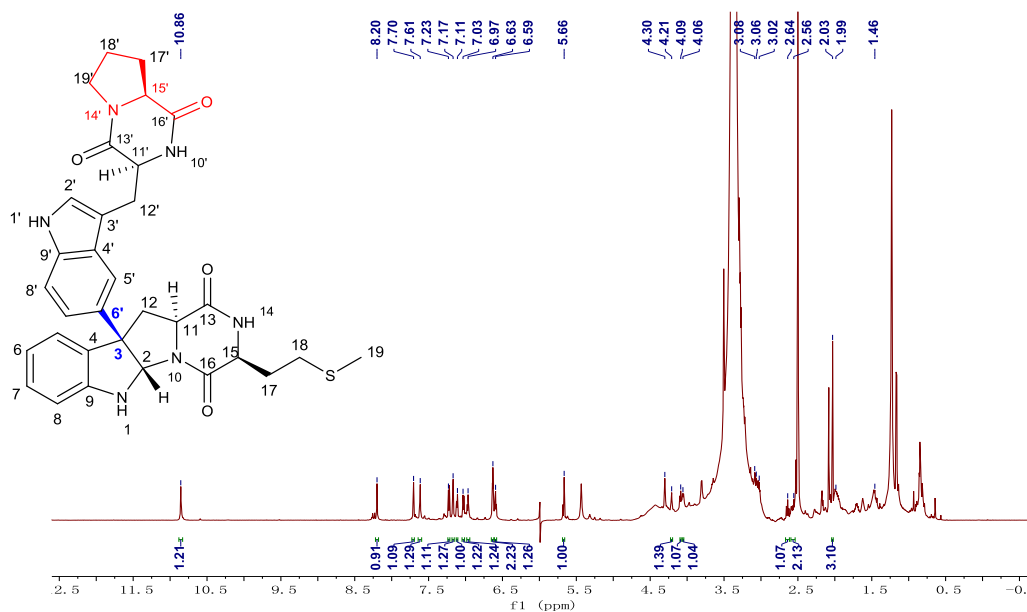**c**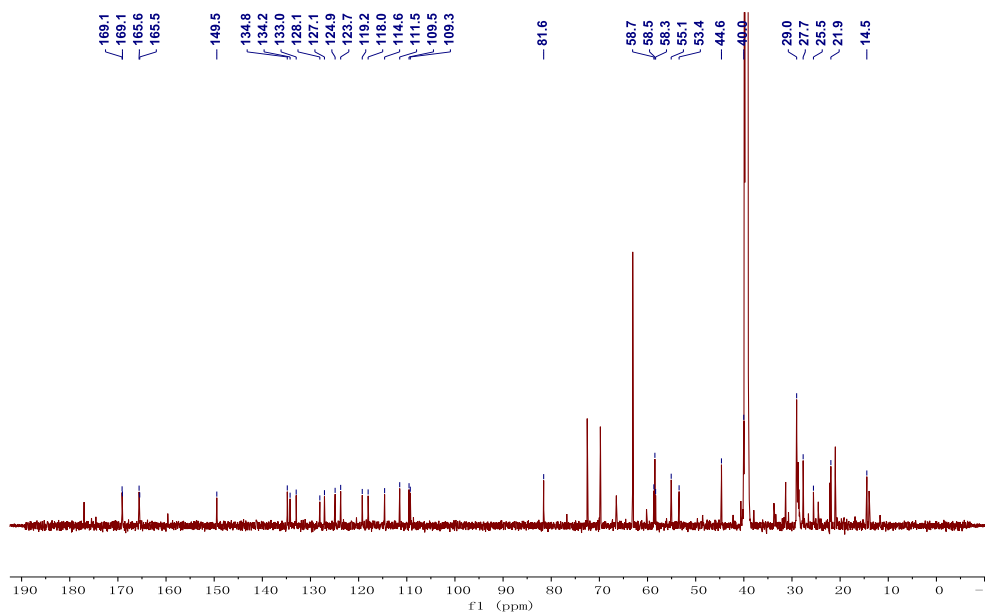

**d**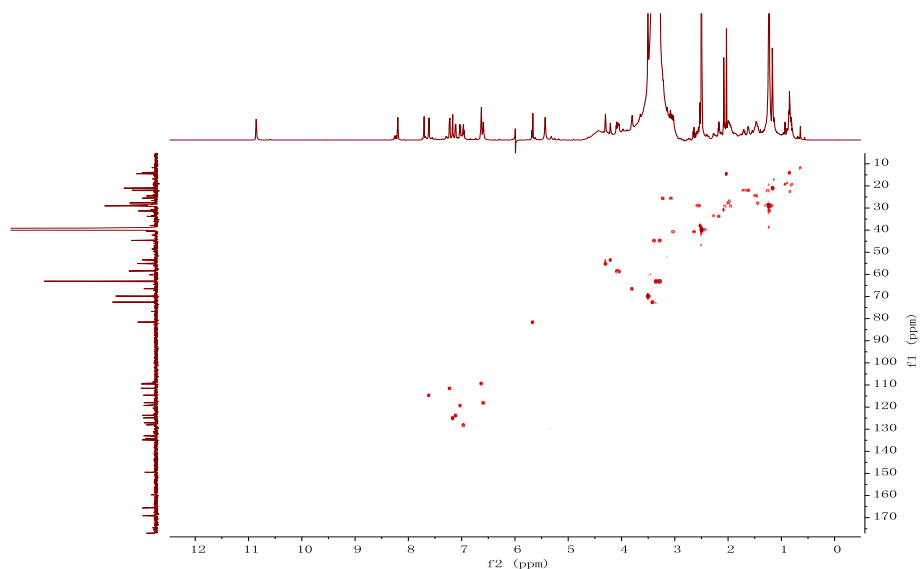**e**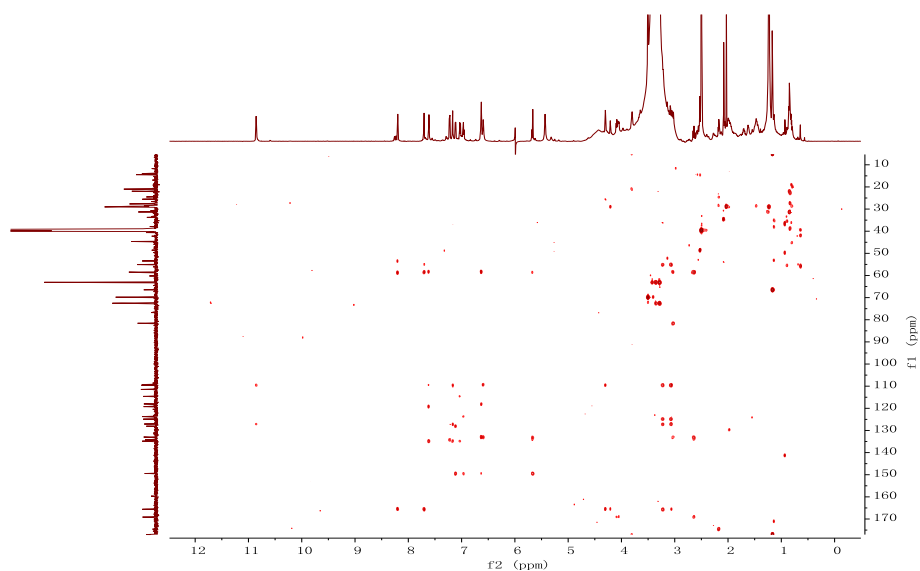**f**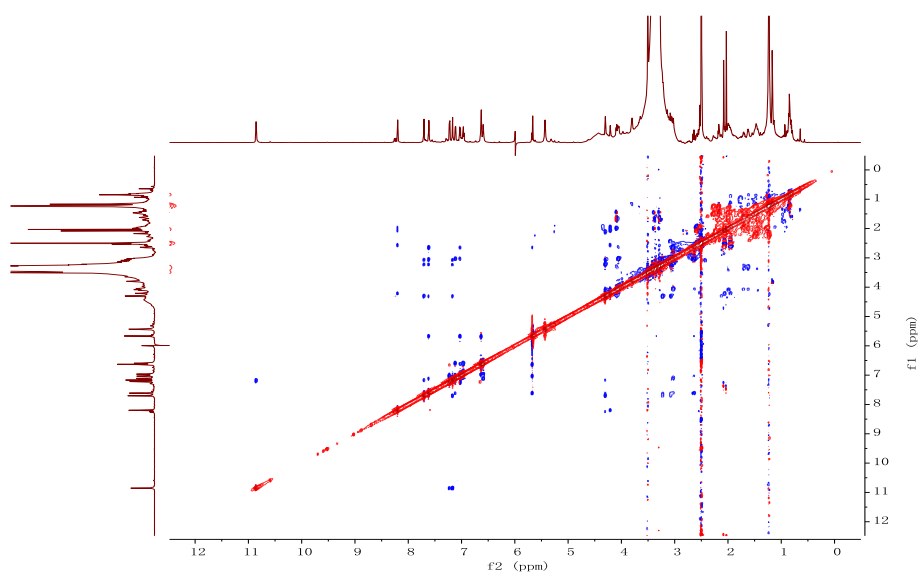

**Supplementary Figure. 27. Spectra of compound NAS-15**(a) HRESIMS of compound of NAS-15 (b)  $^1\text{H}$  NMR of compound of NAS-15 (c)  $^{13}\text{C}$  NMR of compound of NAS-15 (d) HSQC of compound of NAS-15 (e) HMBC of compound of NAS-15 (f) ROSEY of compound of NAS-15

**a**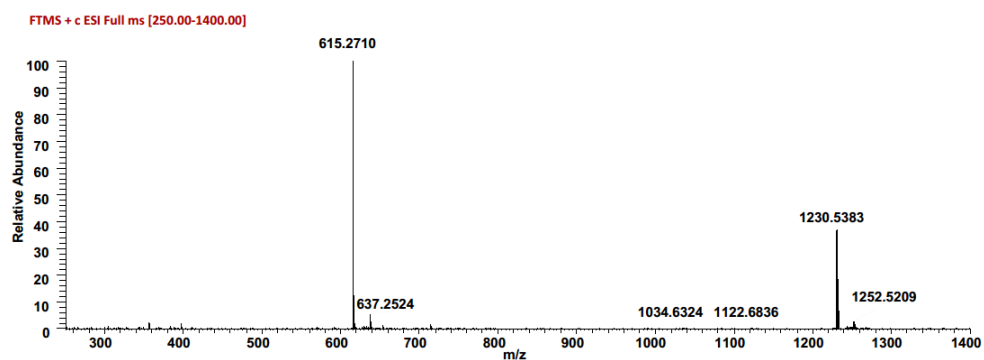**b**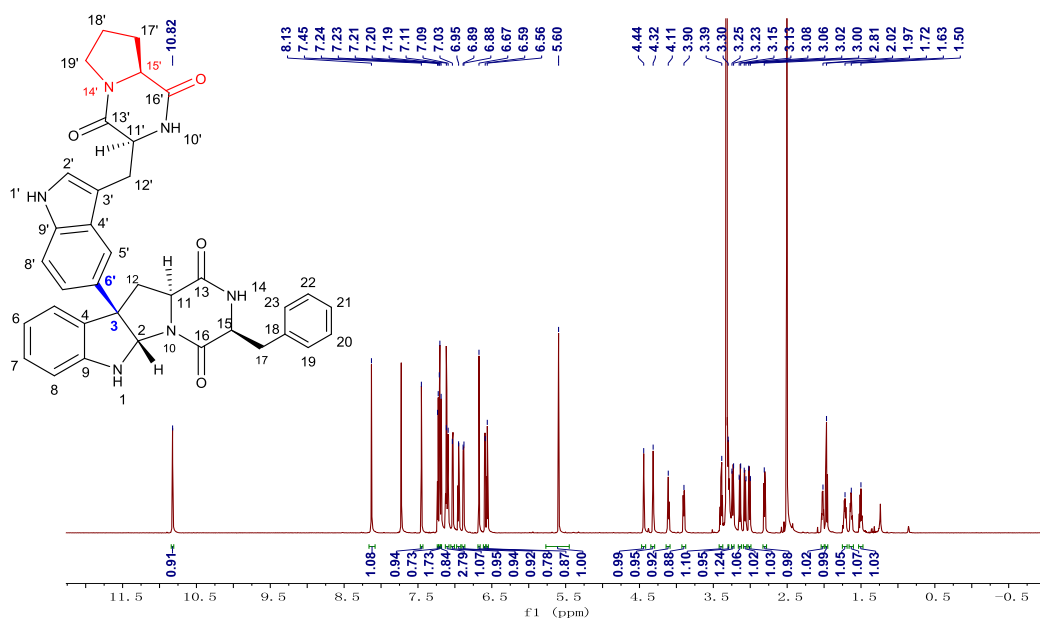**c**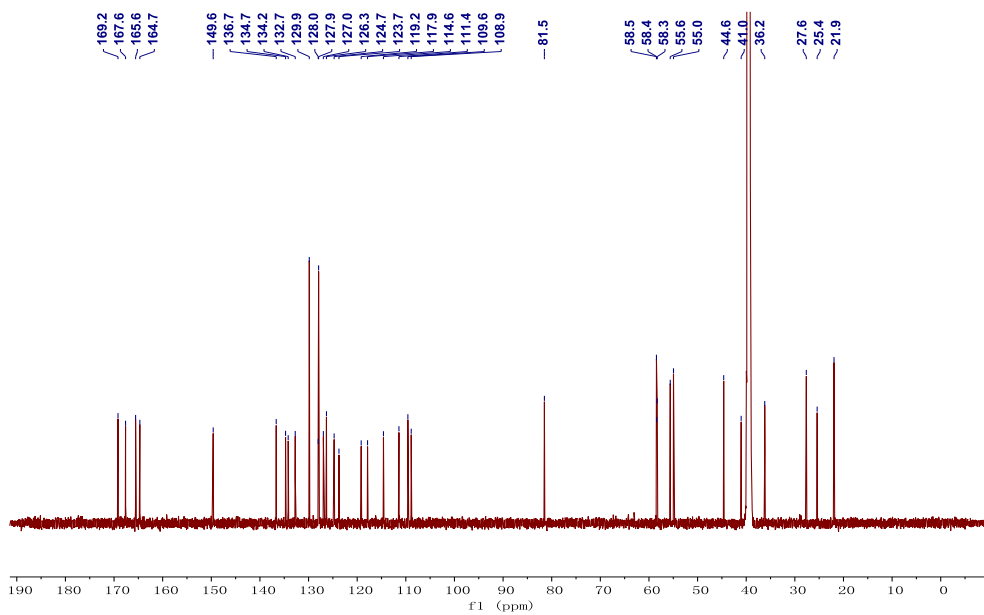

**d**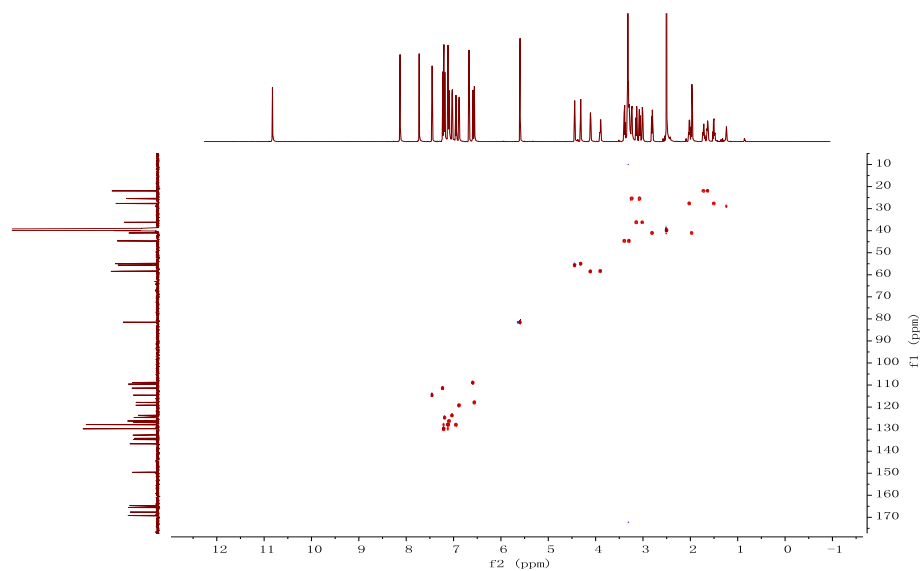**e**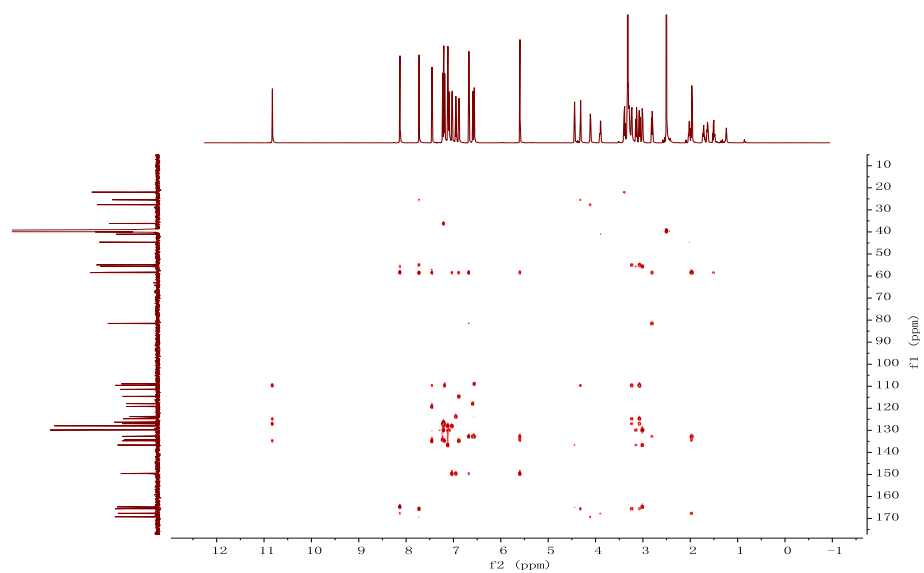**f**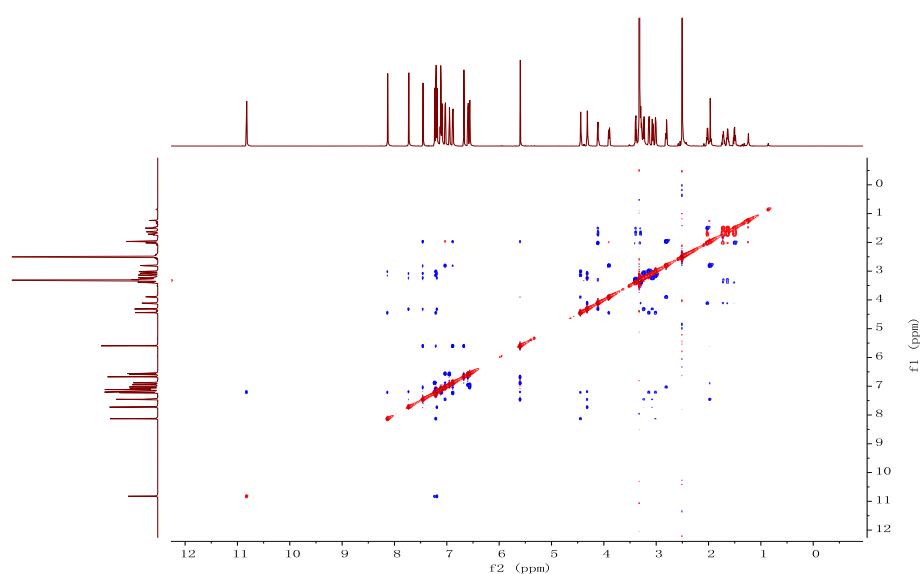

**Supplementary Figure. 28. Spectra of compound NAS-16**(a) HRESIMS of compound of NAS-16 (b)  $^1\text{H}$  NMR of compound of NAS-16 (c)  $^{13}\text{C}$  NMR of compound of NAS-16(d) HSQC of compound of NAS-16(e) HMBC of compound of NAS-16(f) ROSEY of compound of NAS-16

**a**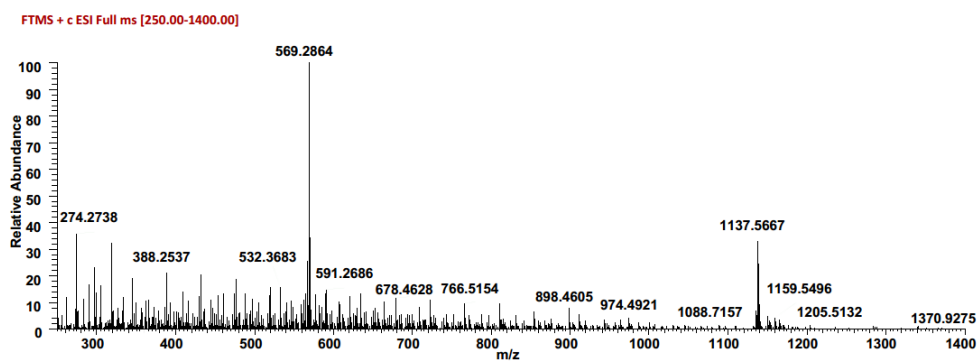**b**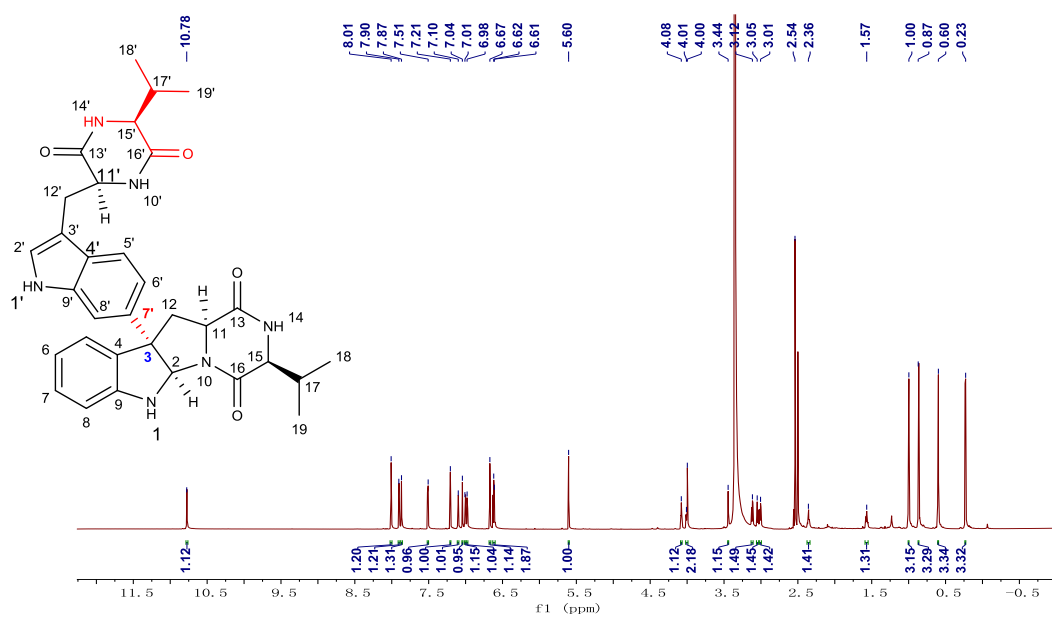**c**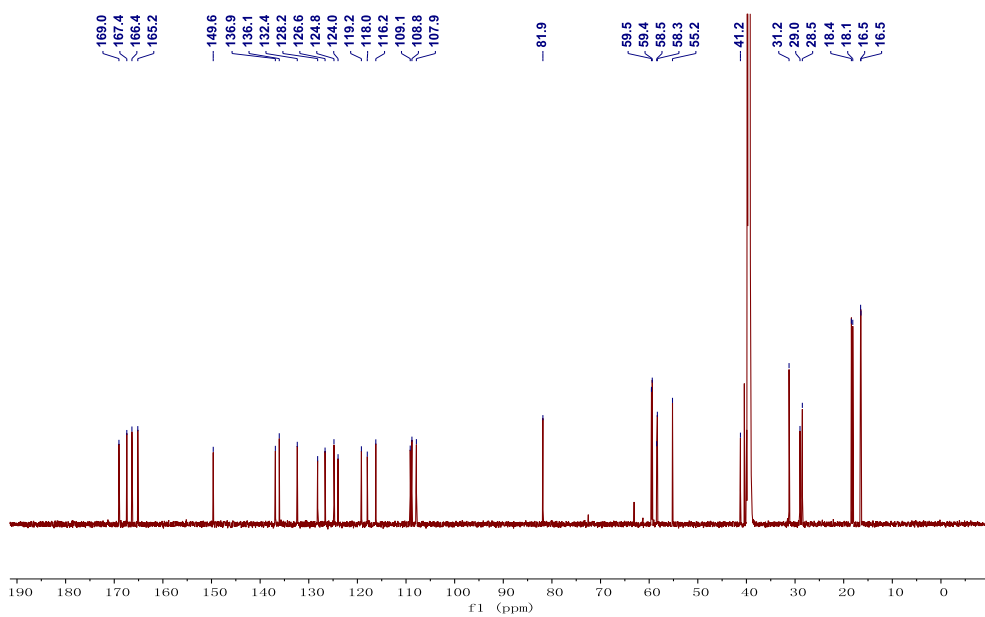

**d**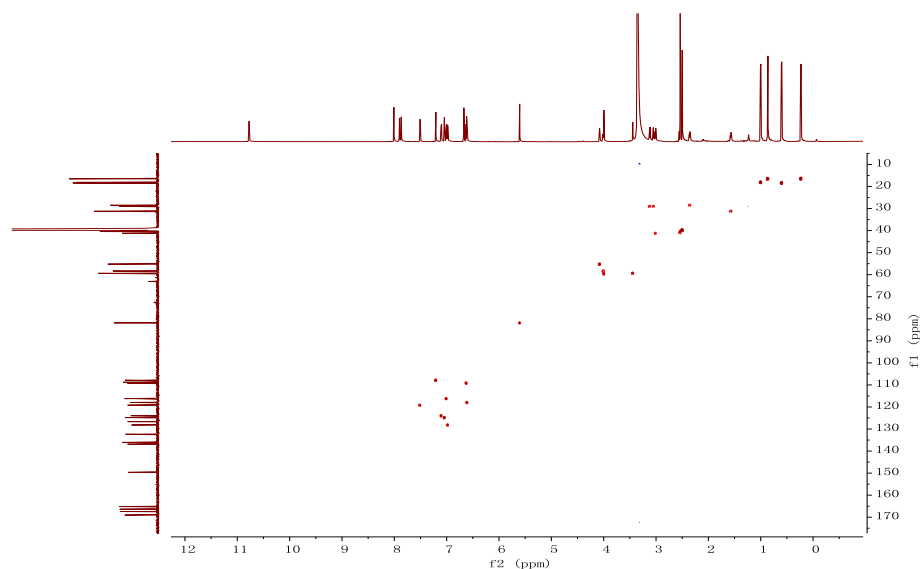**e**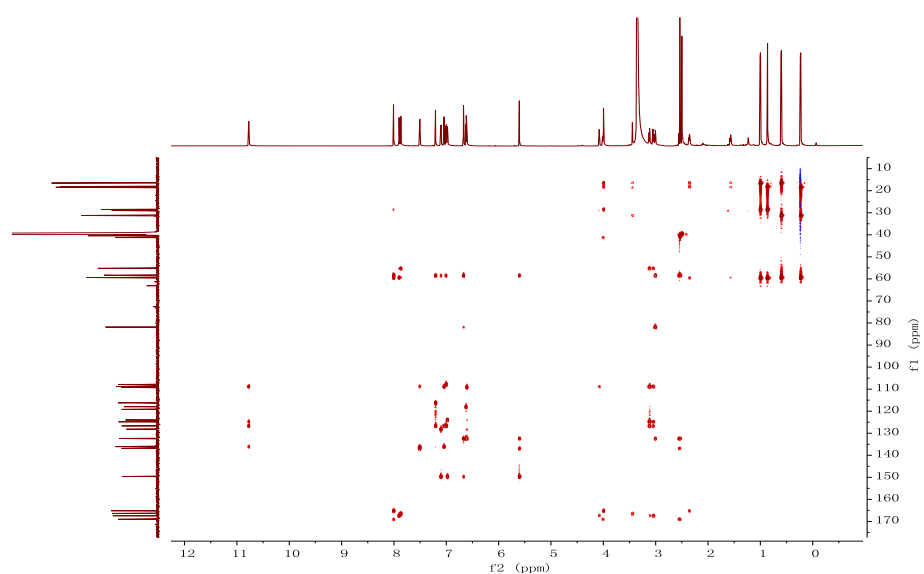**f**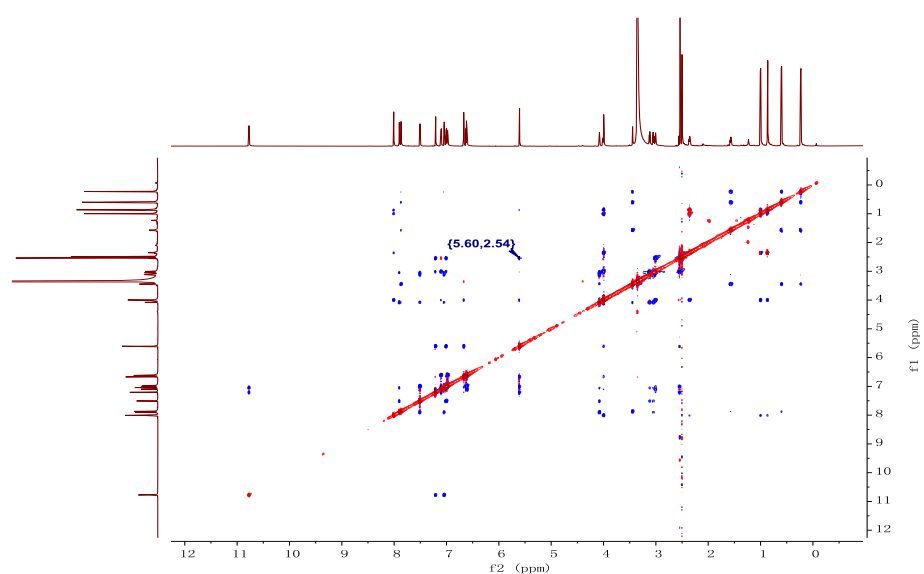

**Supplementary Figure. 29. Spectra of compound NAS-17** (a) HRESIMS of compound of NAS-17 (b)  $^1\text{H}$  NMR of compound of NAS-17 (c)  $^{13}\text{C}$  NMR of compound of NAS-17 (d) HSQC of compound of NAS-17 (e) HMBC of compound of NAS-17 (f) ROSEY of compound of NAS-17

**a**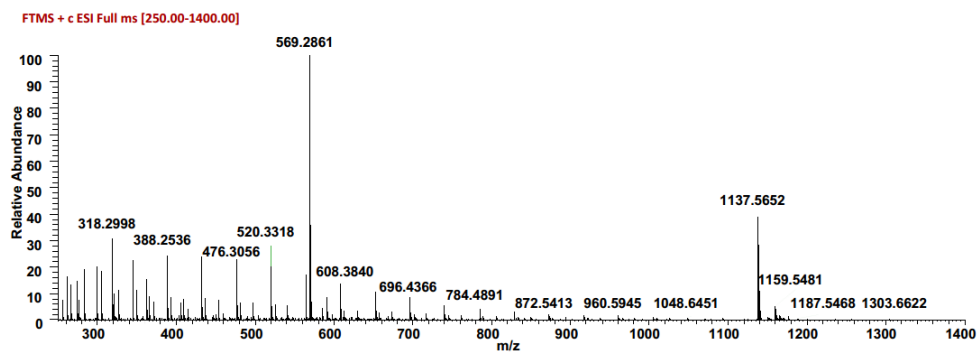**b**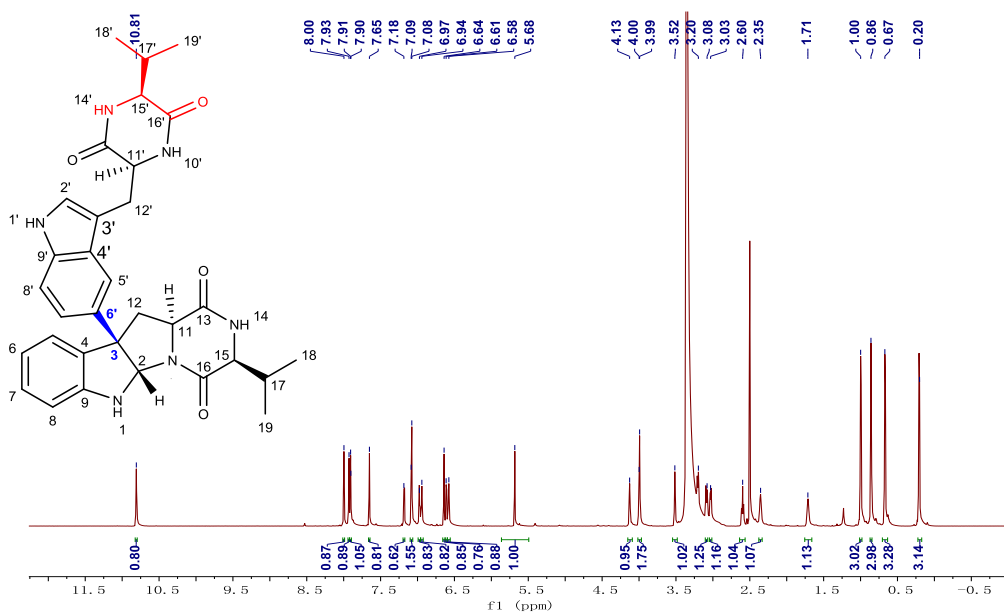**c**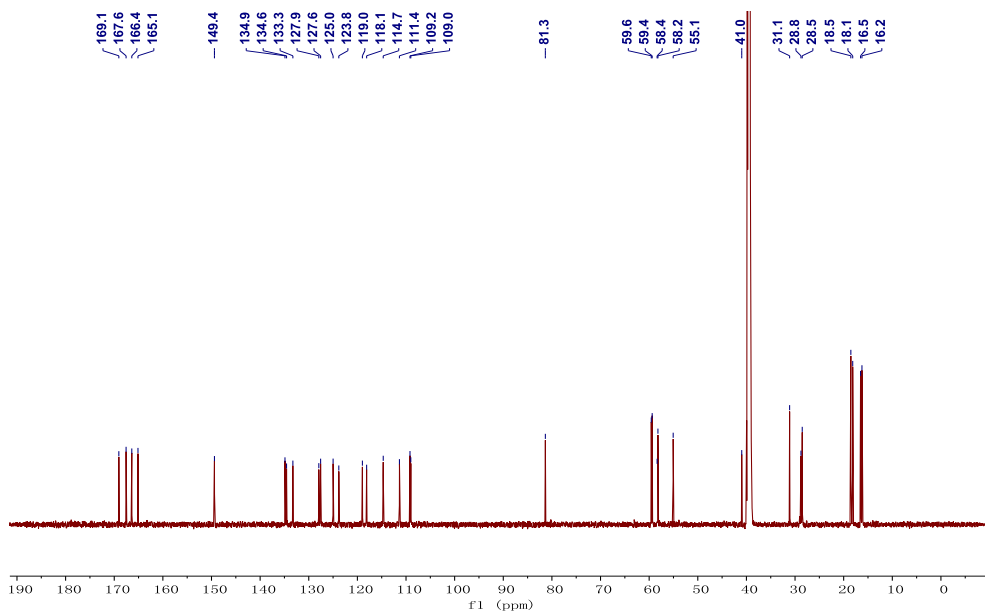

**d**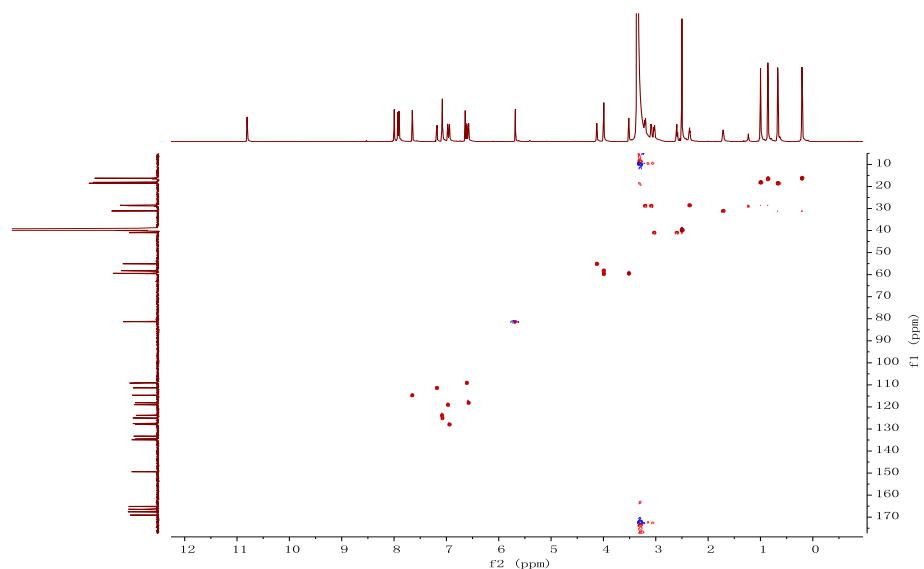**e**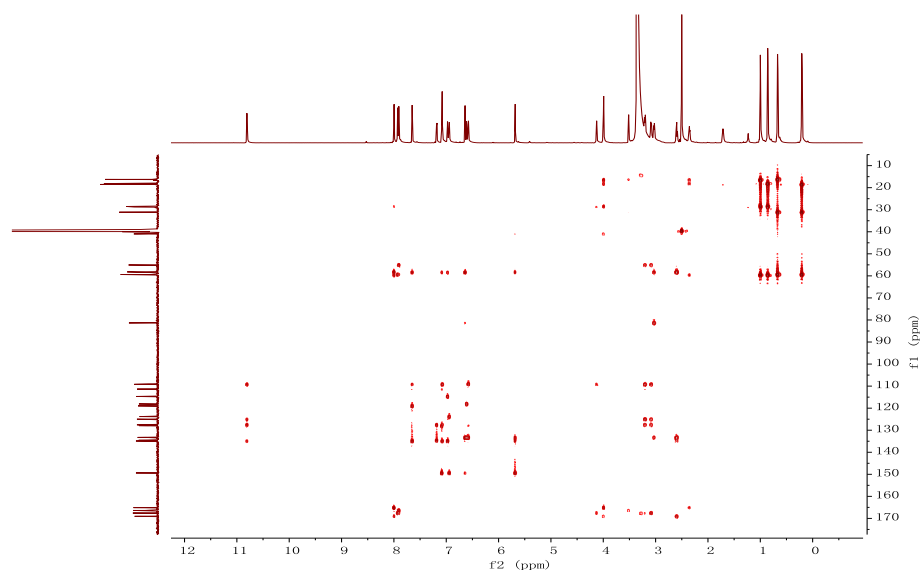**f**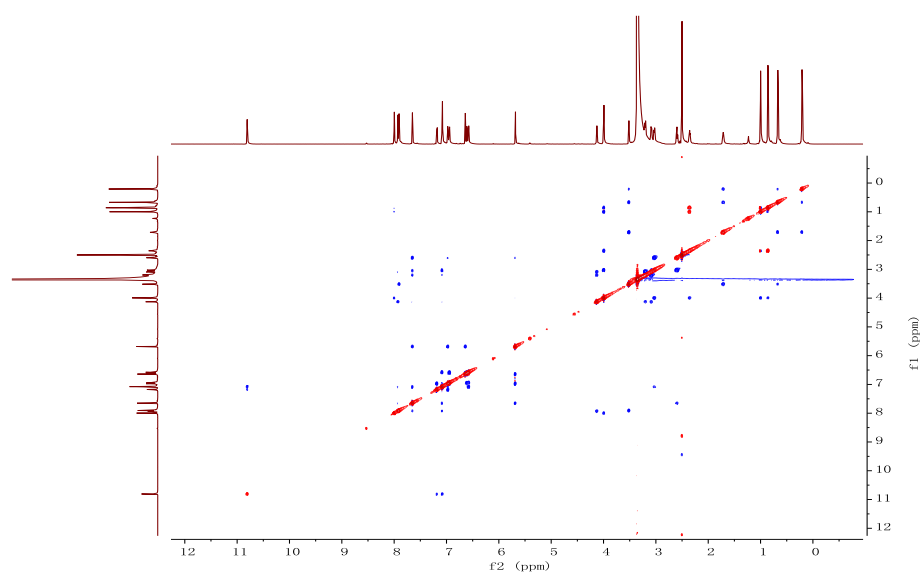

**Supplementary Figure. 30. Spectra of compound NAS-18** (a) HRESIMS of compound of NAS-18 (b)  $^1\text{H}$  NMR of compound of NAS-18 (c)  $^{13}\text{C}$  NMR of compound of NAS-18 (d) HSQC of compound of NAS-18 (e) HMBC of compound of NAS-18 (f) ROSEY of compound of NAS-18



**a**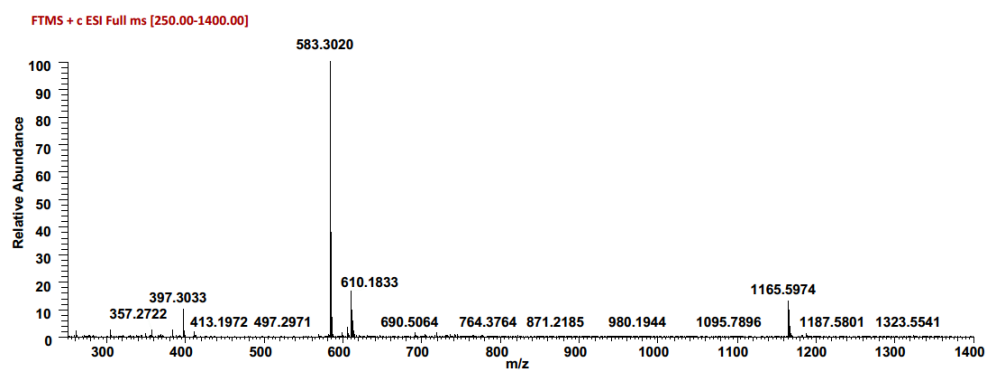**b**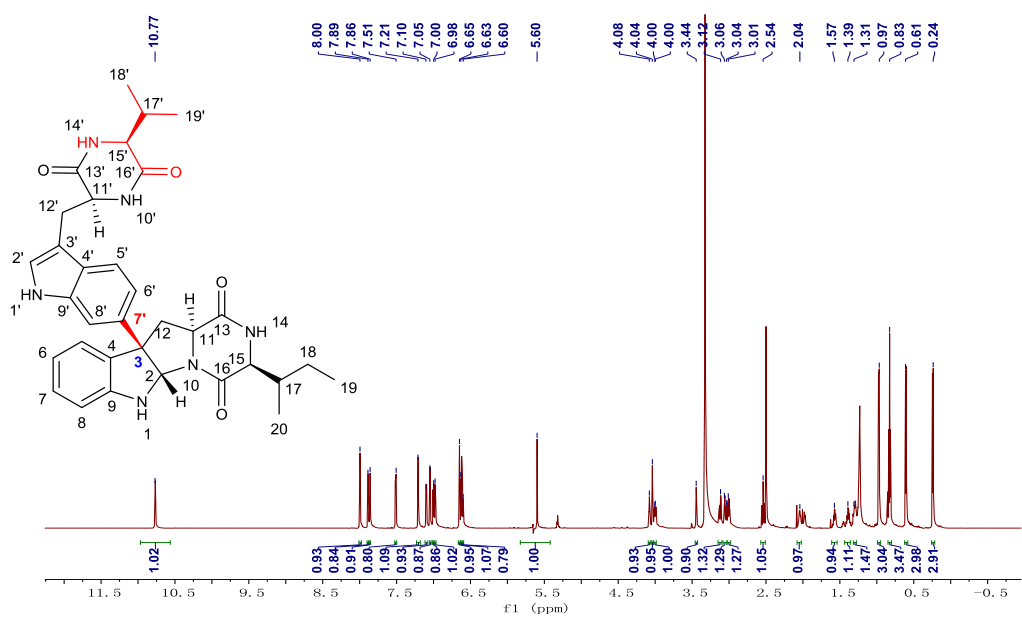**c**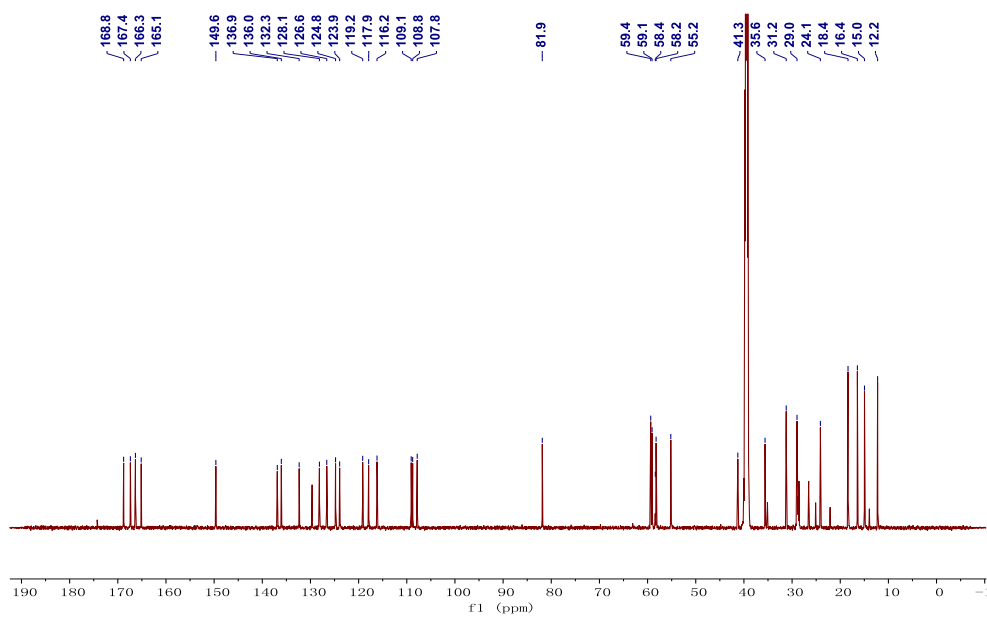

**d**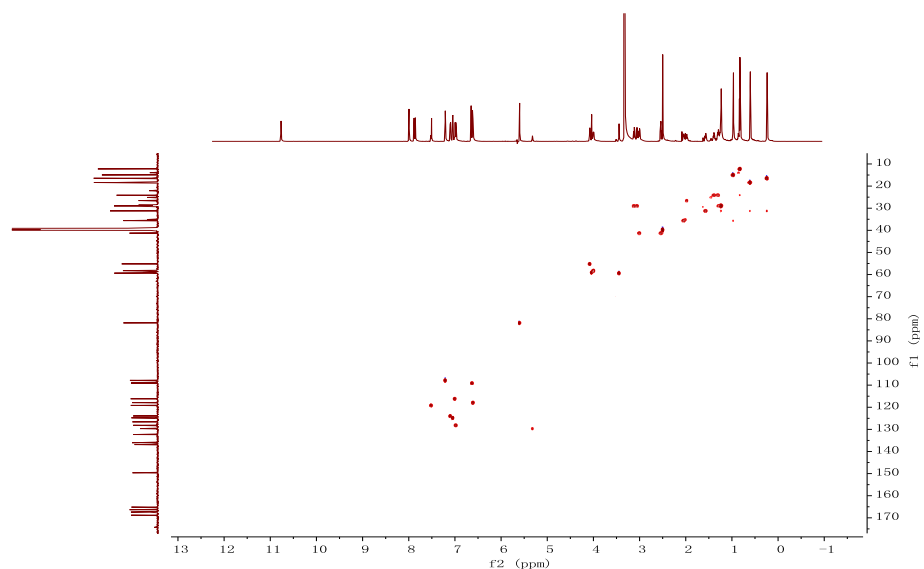**e**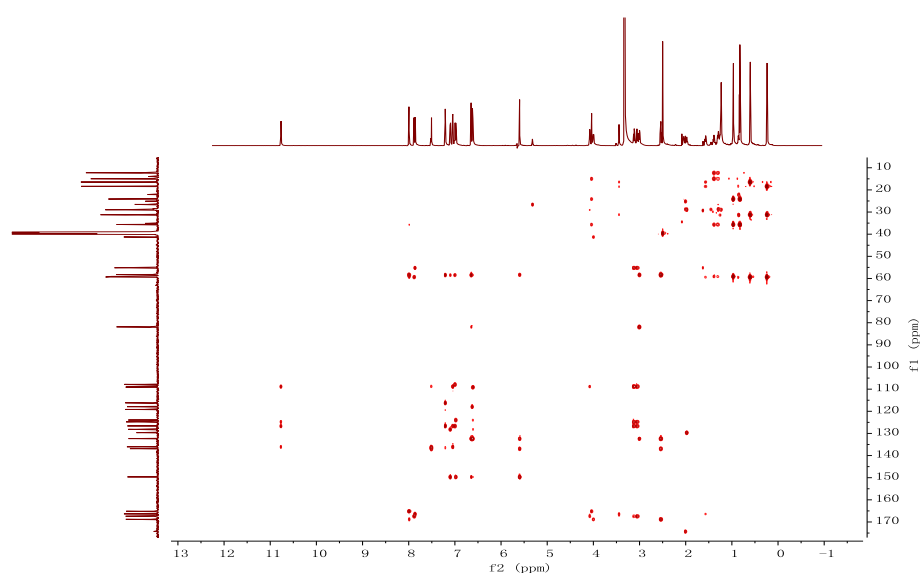**f**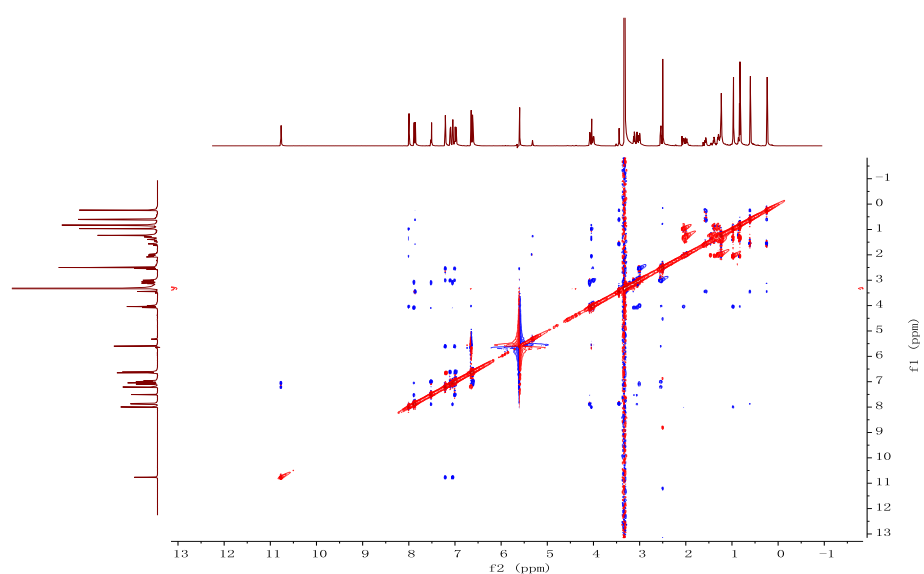

**Supplementary Figure. 31. Spectra of compound NAS-19** (a) HRESIMS of compound of NAS-19 (b)  $^1\text{H}$  NMR of compound of NAS-19 (c)  $^{13}\text{C}$  NMR of compound of NAS-19 (d) HSQC of compound of NAS-19 (e) HMBC of compound of NAS-19 (f) ROSEY of compound of NAS-19

**a**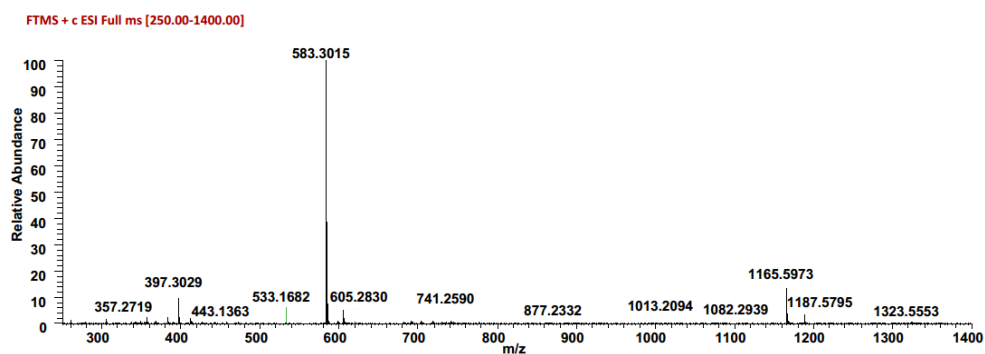**b**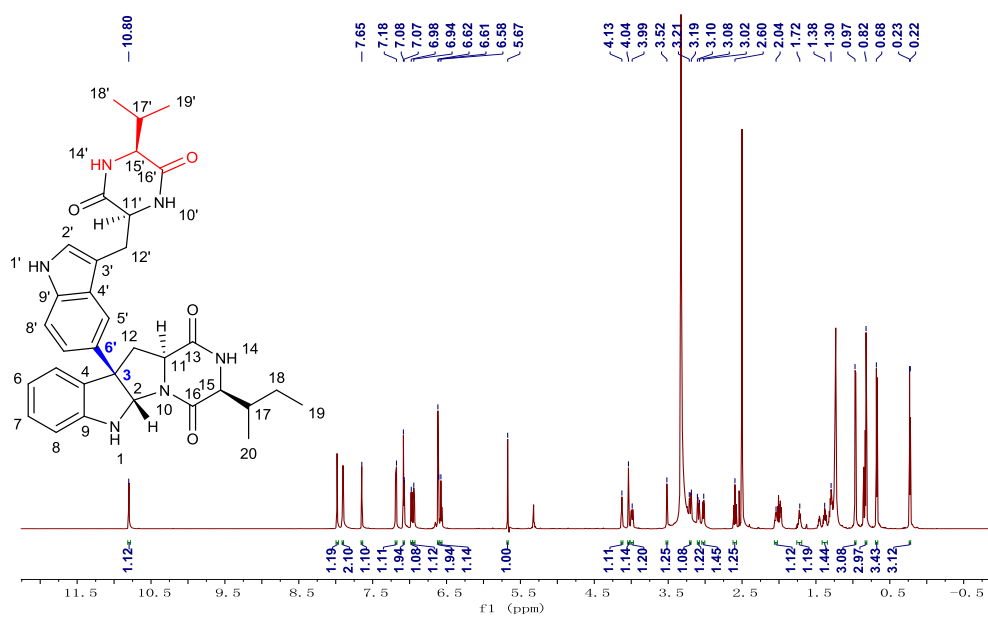**c**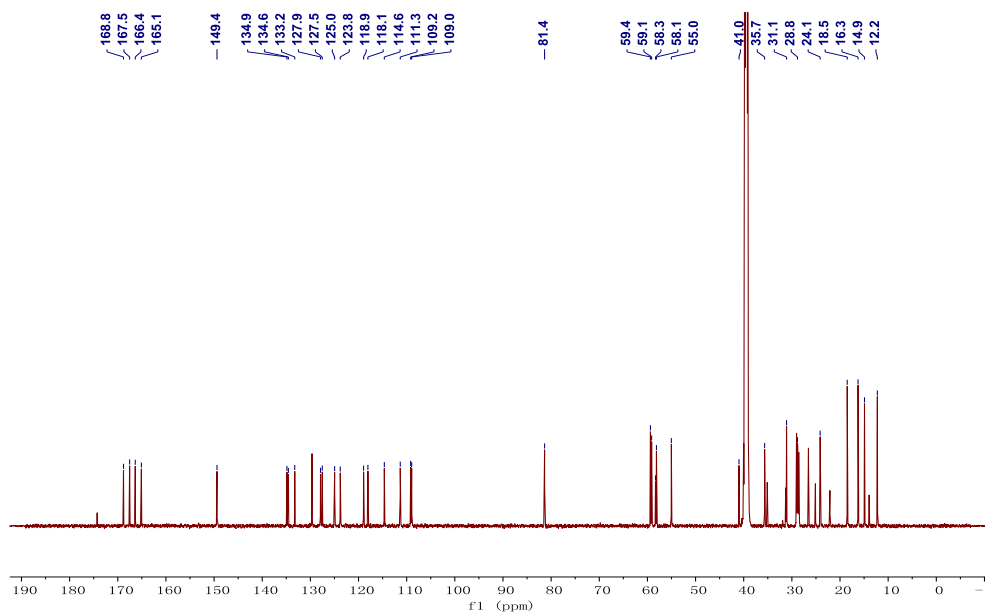

**d**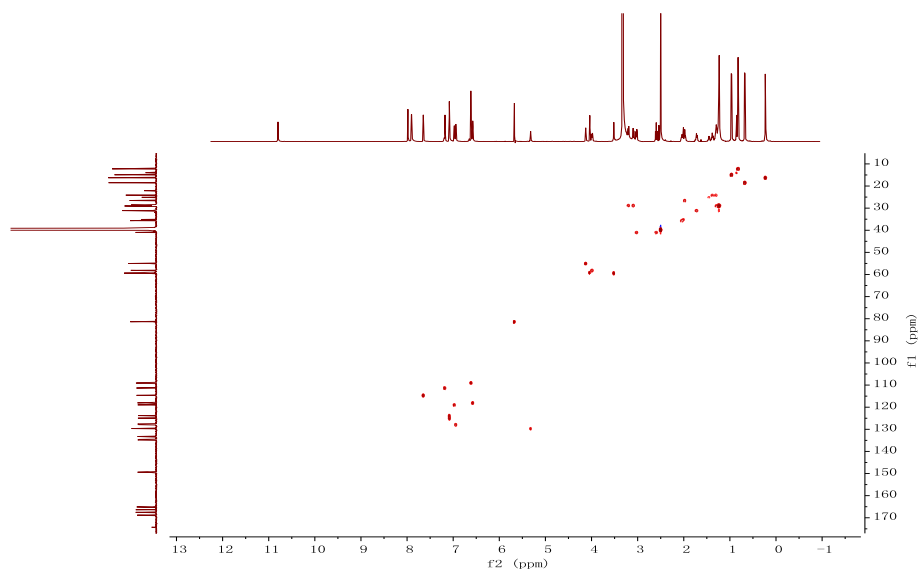**e**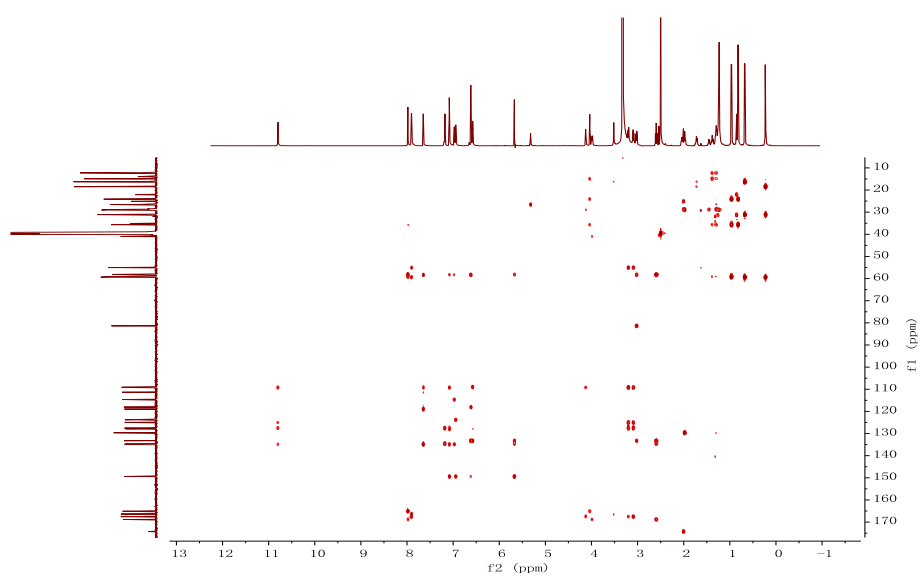**f**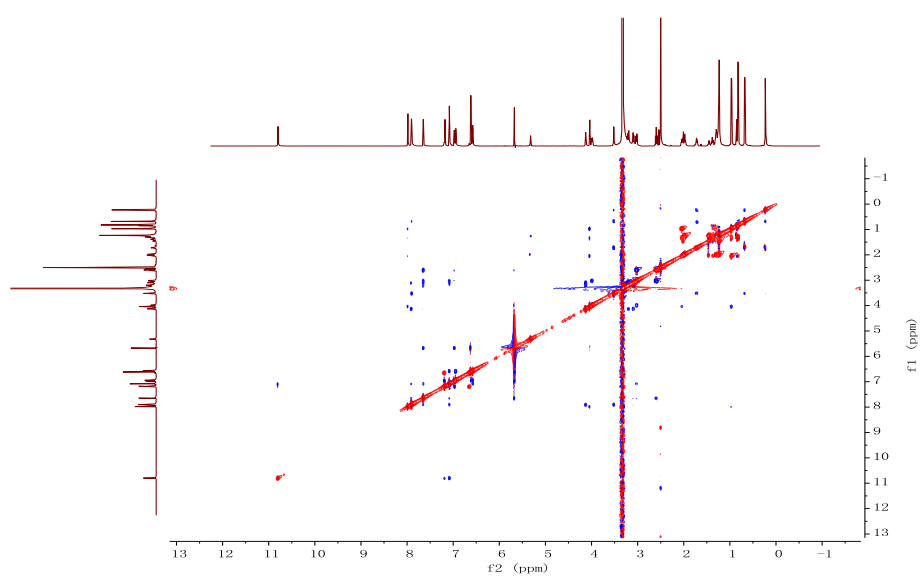

**Supplementary Figure. 32. Spectra of compound NAS-20** (a) HRESIMS of compound of NAS-20 (b)  $^1\text{H}$  NMR of compound of NAS-20 (c)  $^{13}\text{C}$  NMR of compound of NAS-20 (d) HSQC of compound of NAS-20 (e) HMBC of compound of NAS-20 (f) ROSEY of compound of NAS-20

**a**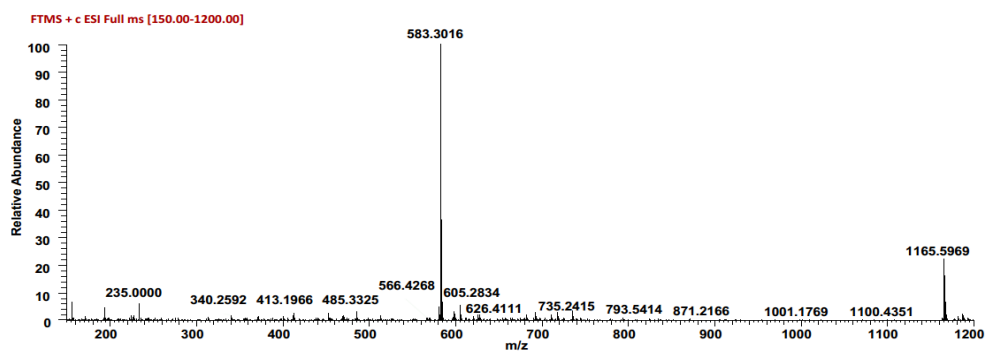**b**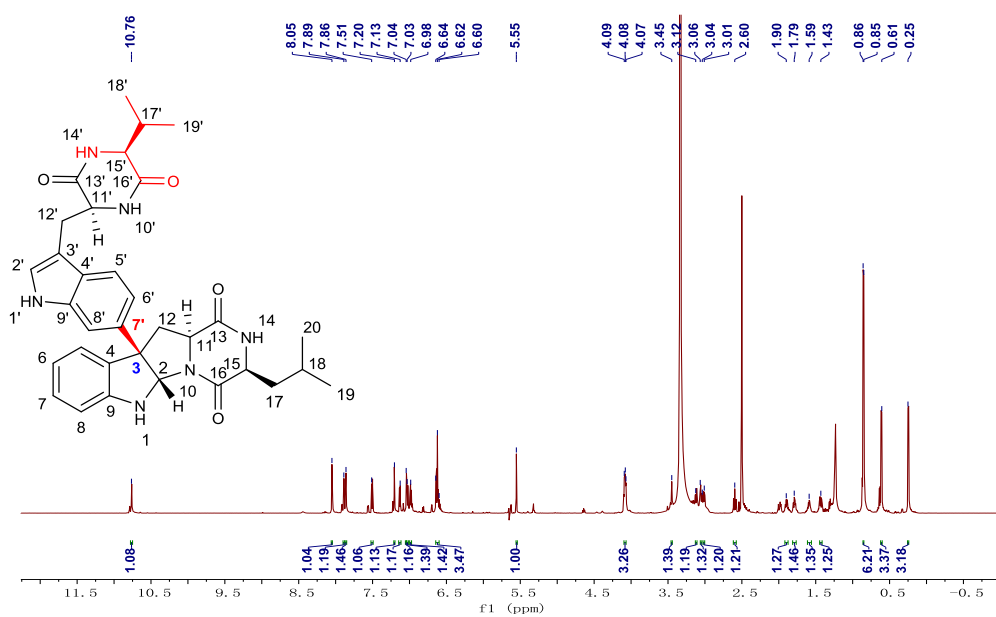**c**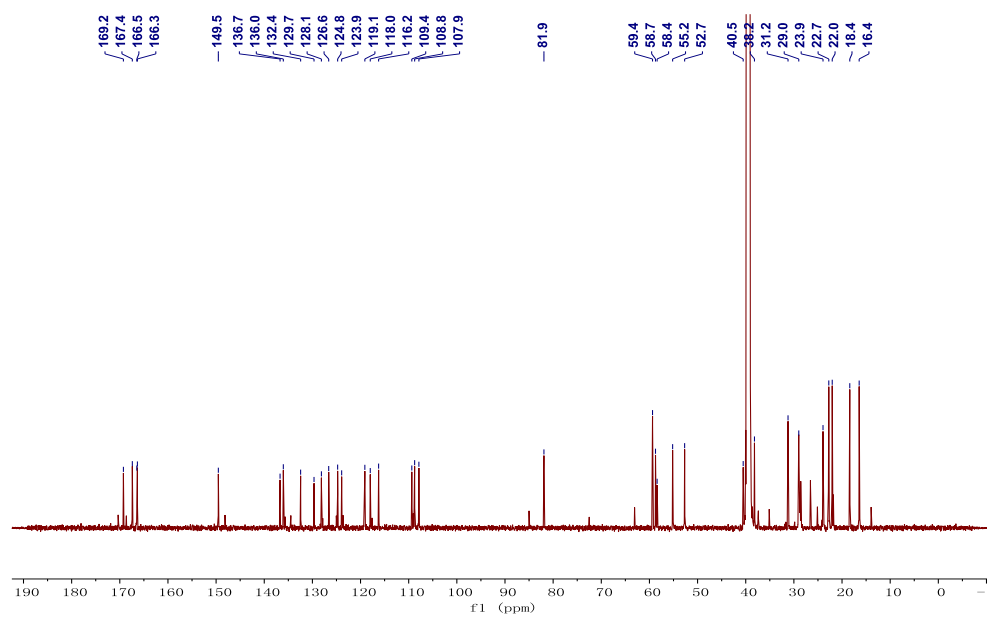

**d**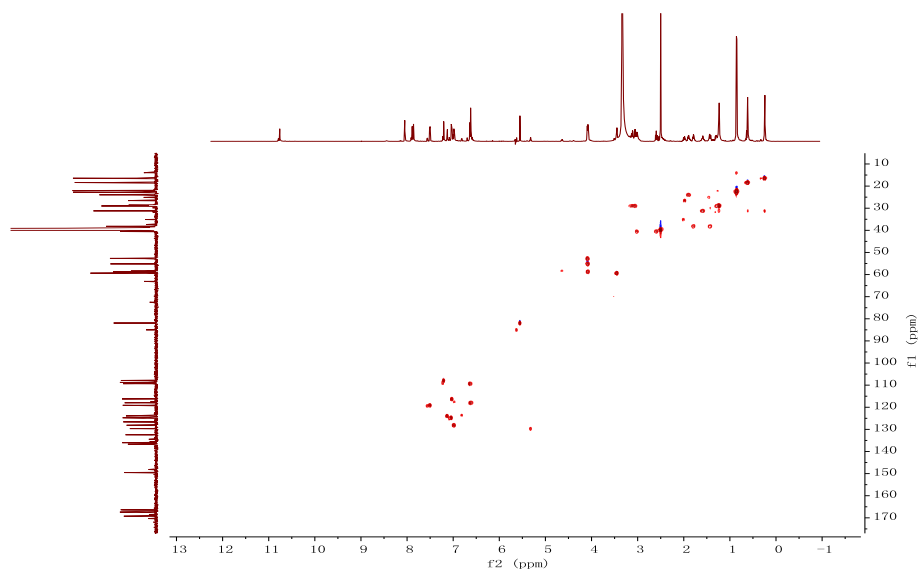**e**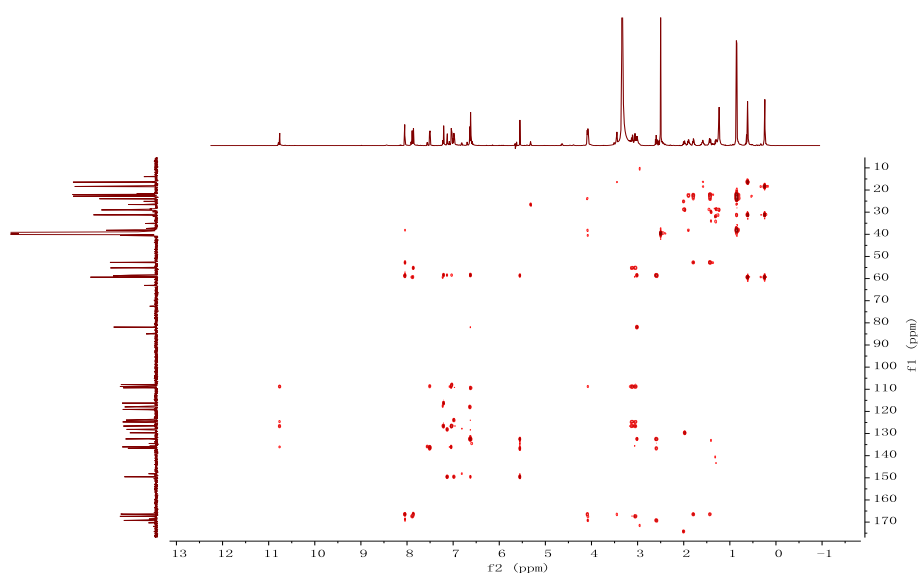**f**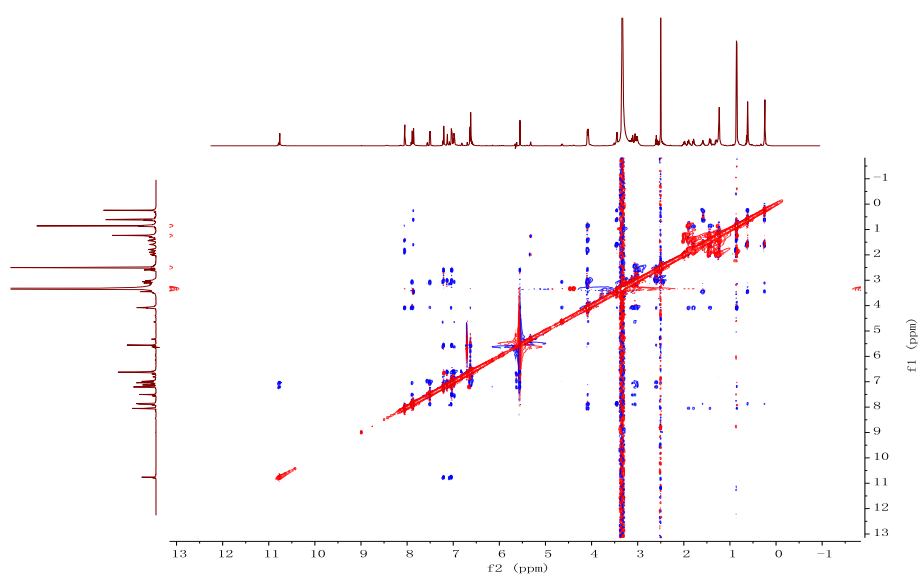

**Supplementary Figure. 33.Spectra of compound NAS-21** (a) HRESIMS of compound of NAS-21(b)  $^1\text{H}$  NMR of compound of NAS-21(c)  $^{13}\text{C}$  NMR of compound of NAS-21(d) HSQC of compound of NAS-21 (e) HMBC of compound of NAS-21 (f) ROSEY of compound of NAS-21

a

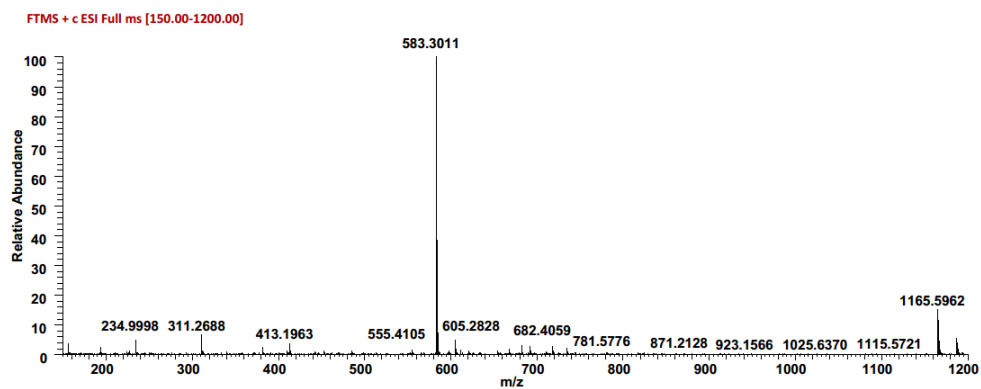

b

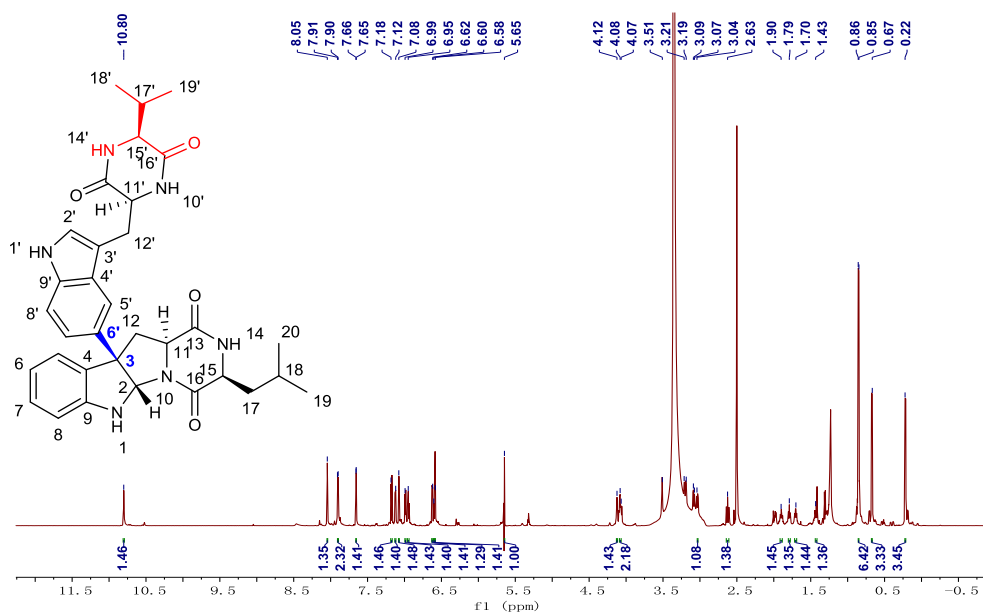

c

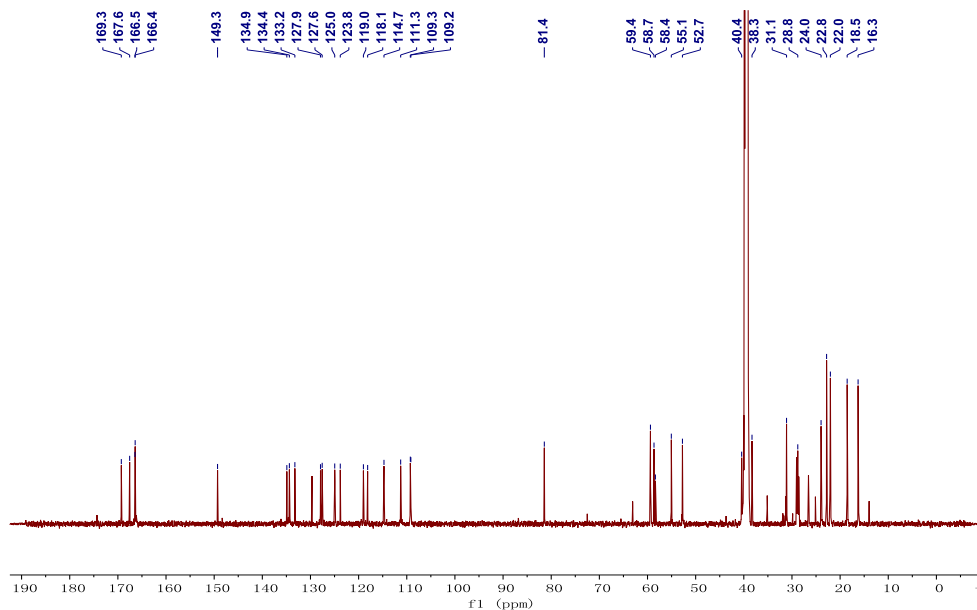

**d**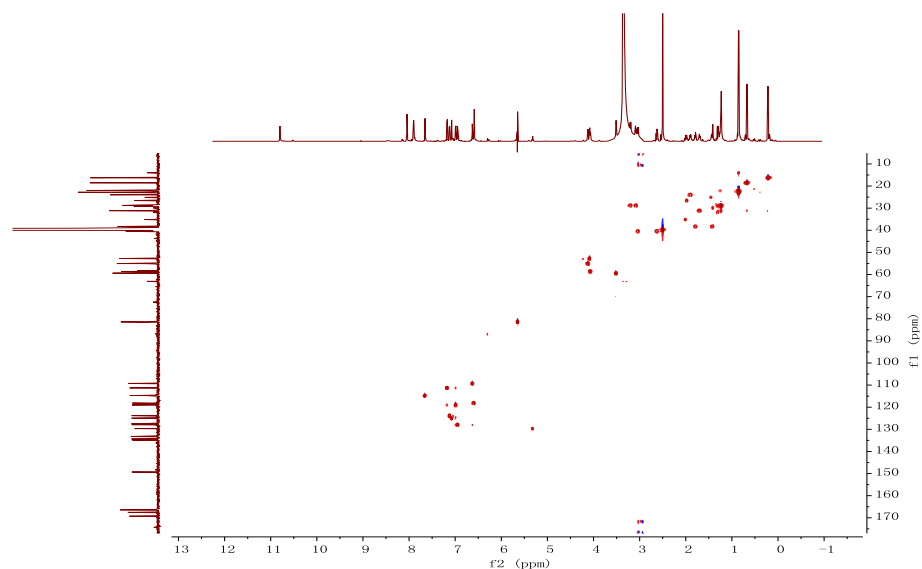**e**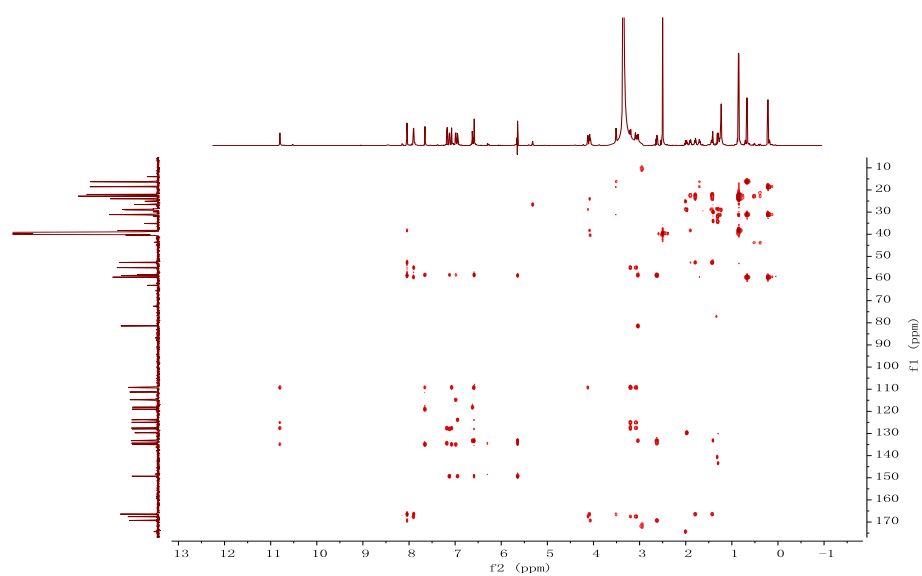**f**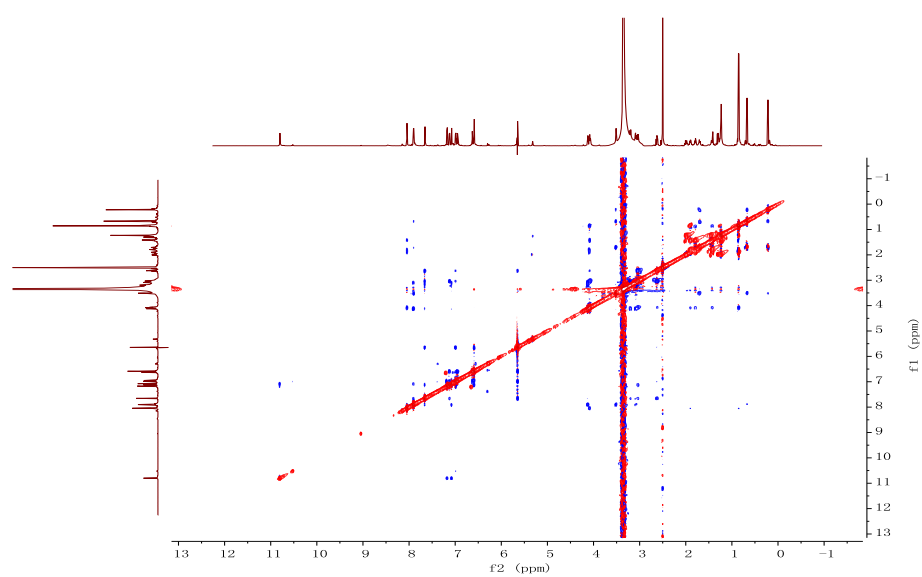

**Supplementary Figure. 34.Spectra of compound NAS-22** (a) HRESIMS of compound of NAS-22(b)  $^1\text{H}$  NMR of compound of NAS-22(c)  $^{13}\text{C}$  NMR of compound of NAS-22(d) HSQC of compound of NAS-22 (e) HMBC of compound of NAS-22 (f) ROSEY of compound of NAS-22



**a**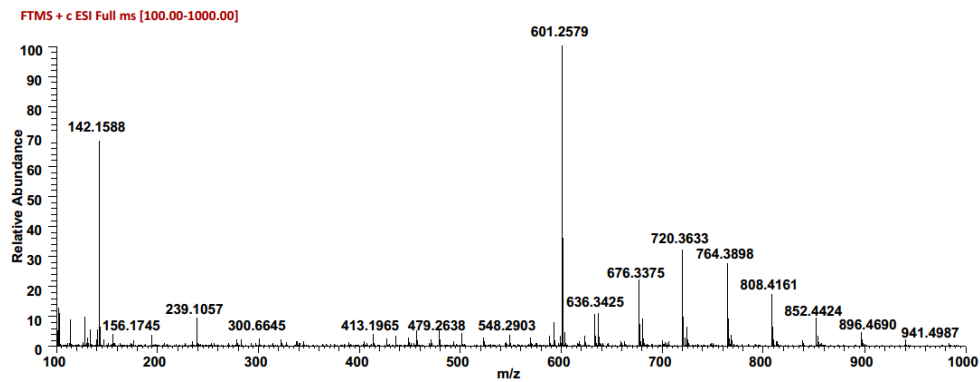**b**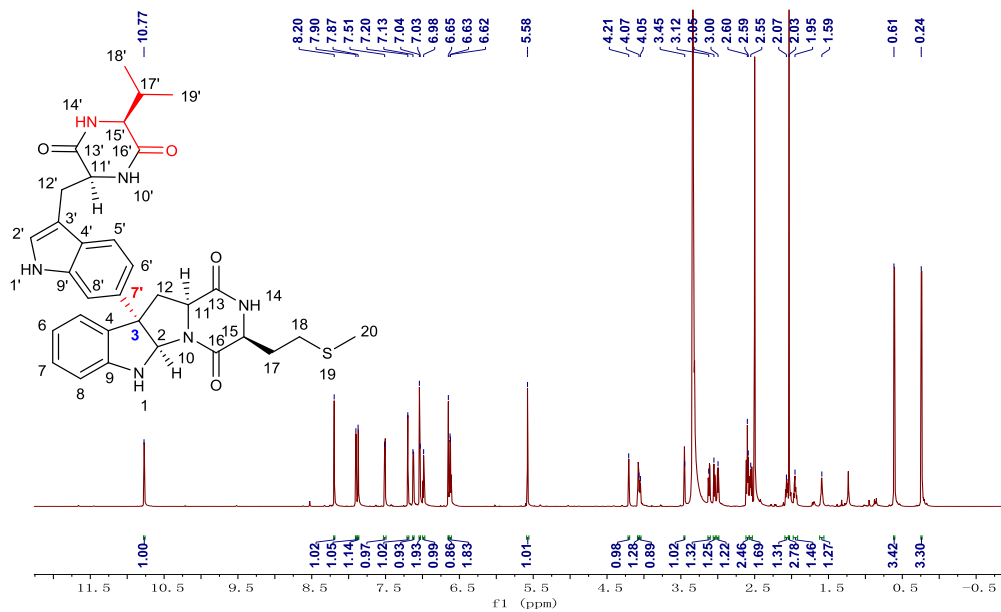**c**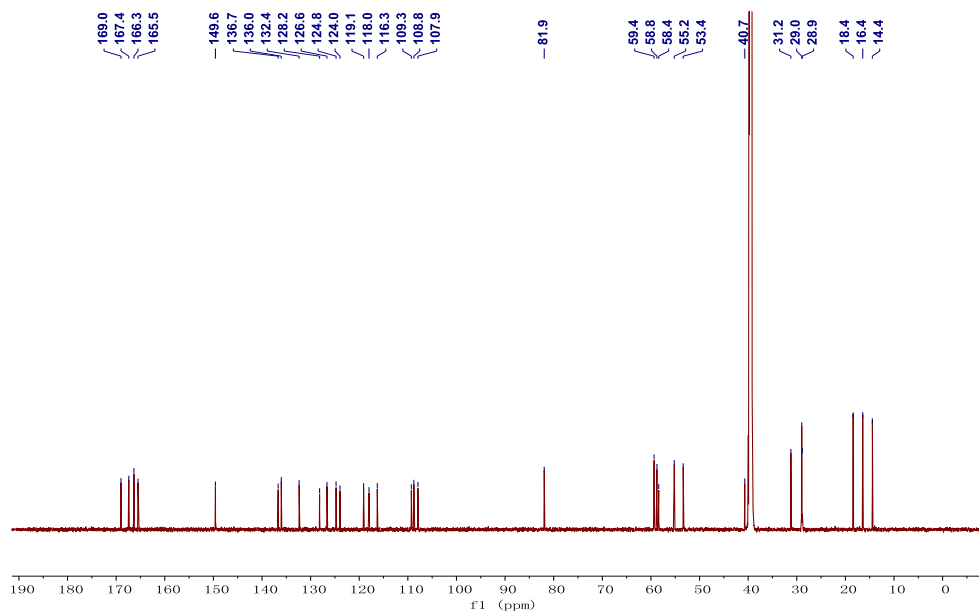

**d**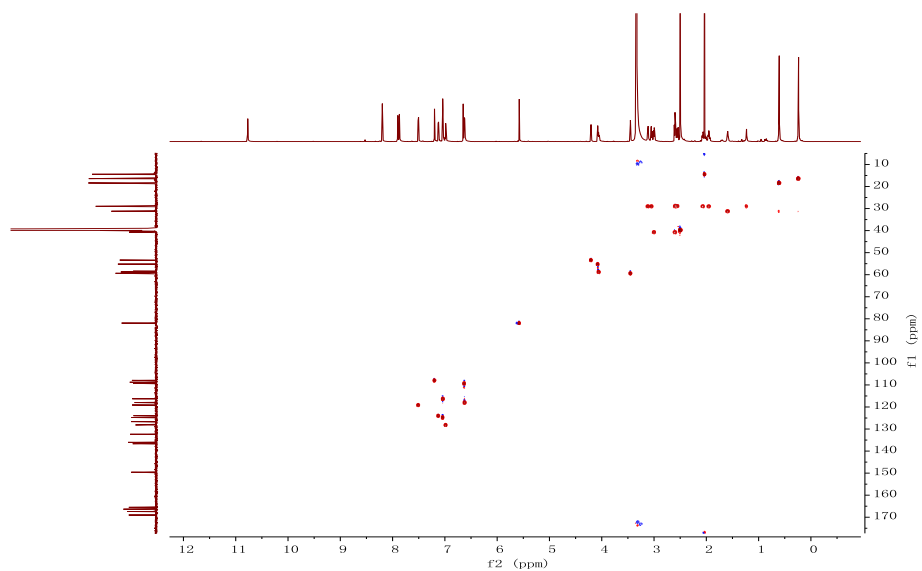**e**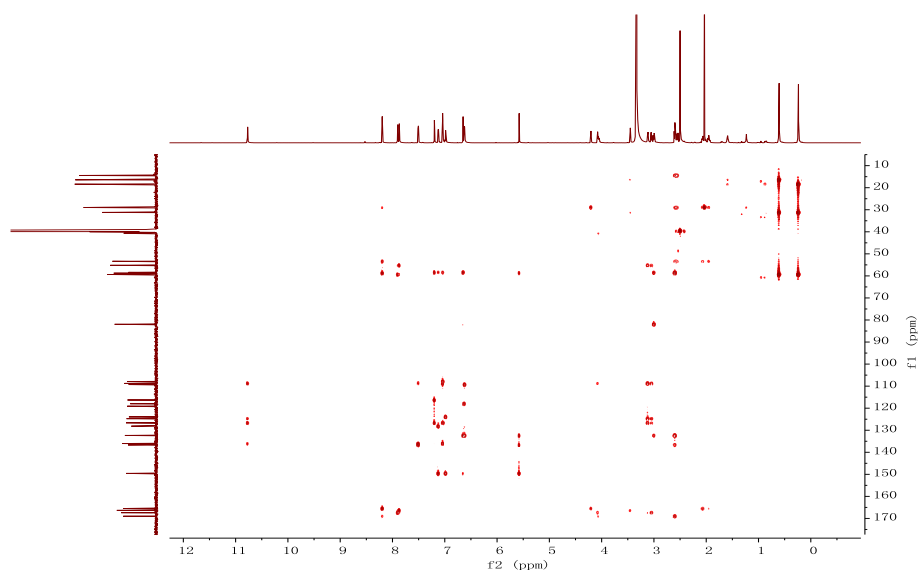**f**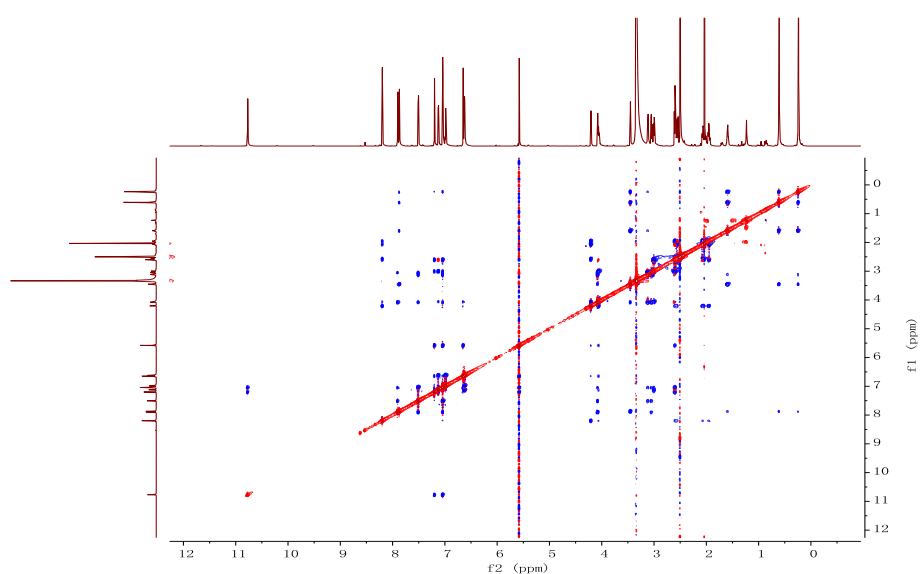

**Supplementary Figure. 35.** Spectra of compound NAS-23 (a) HRESIMS of compound of NAS-23 (b)  $^1\text{H}$  NMR of compound of NAS-23 (c)  $^{13}\text{C}$  NMR of compound of NAS-23 (d) HSQC of compound of NAS-23 (e) HMBC of compound of NAS-23 (f) ROSEY of compound of NAS-23

**a**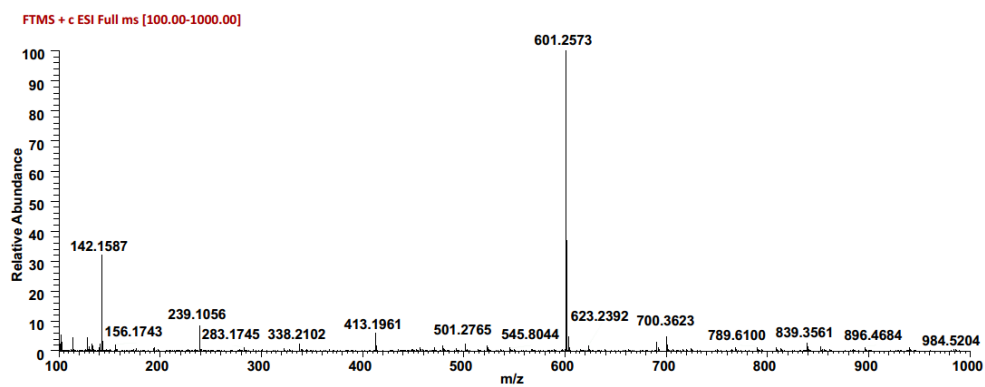**b**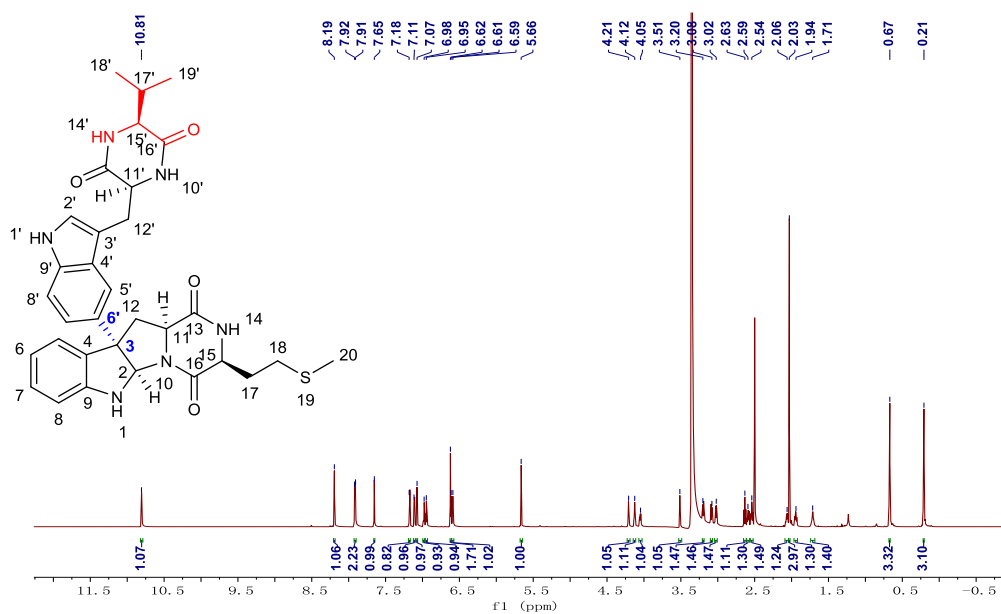**c**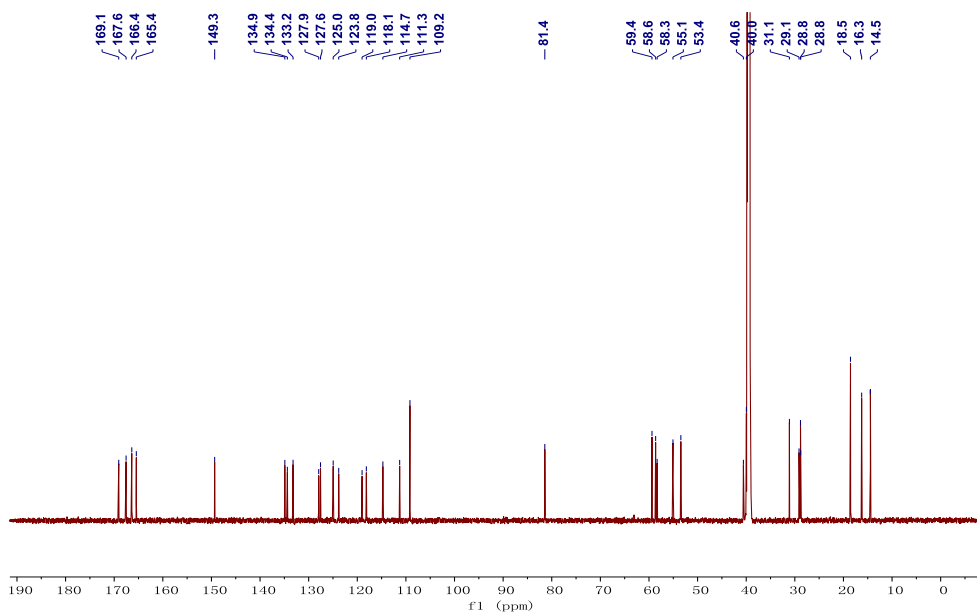

**d**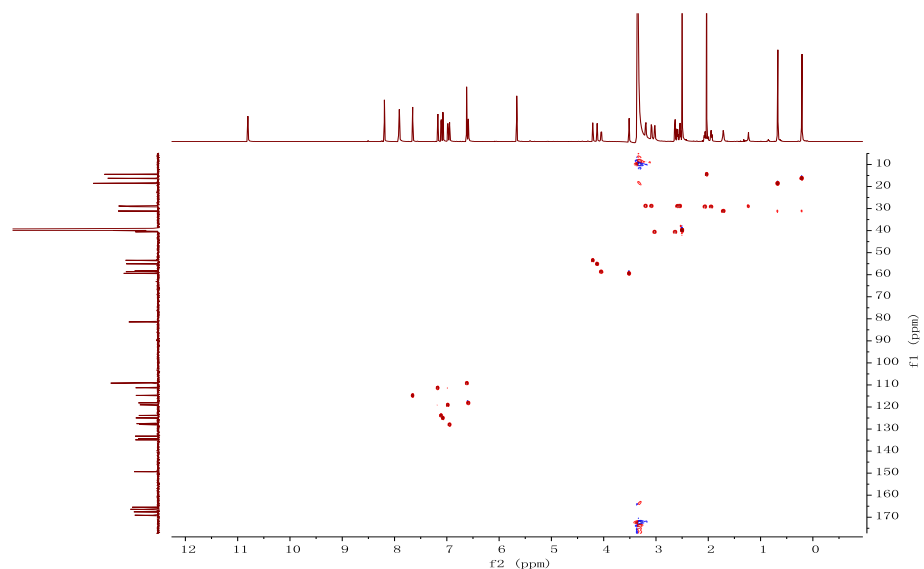**e**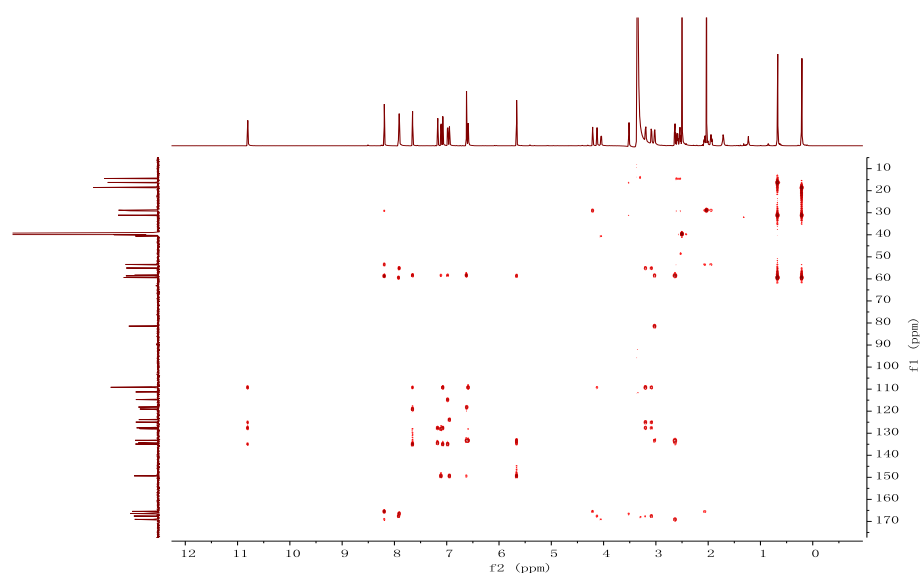**f**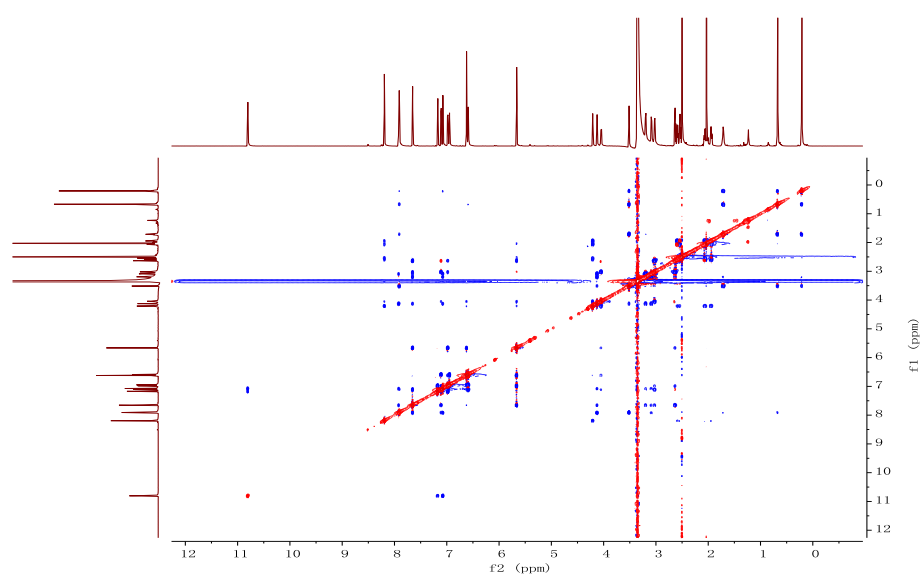

**Supplementary Figure. 36.**Spectra of compound NAS-24 (a) HRESIMS of compound of NAS-24(b)  $^1\text{H}$  NMR of compound of NAS-24(c)  $^{13}\text{C}$  NMR of compound of NAS-24(d) HSQC of compound of NAS-24 (e) HMBC of compound of NAS-24 (f) ROSEY of compound of NAS-24

**a**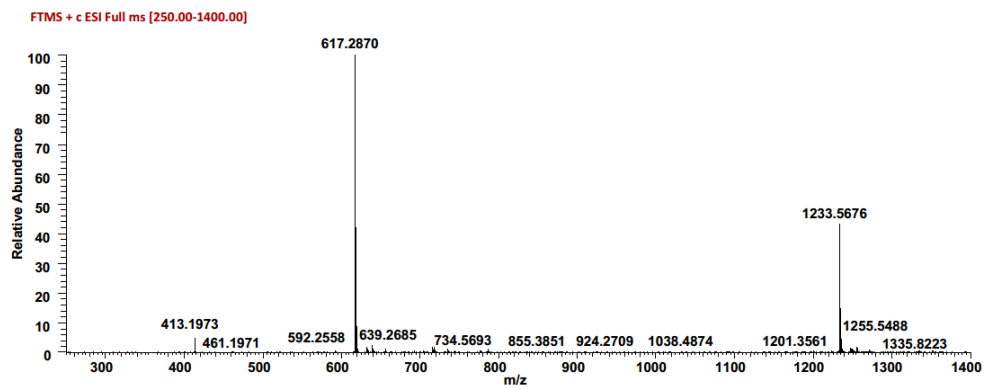**b**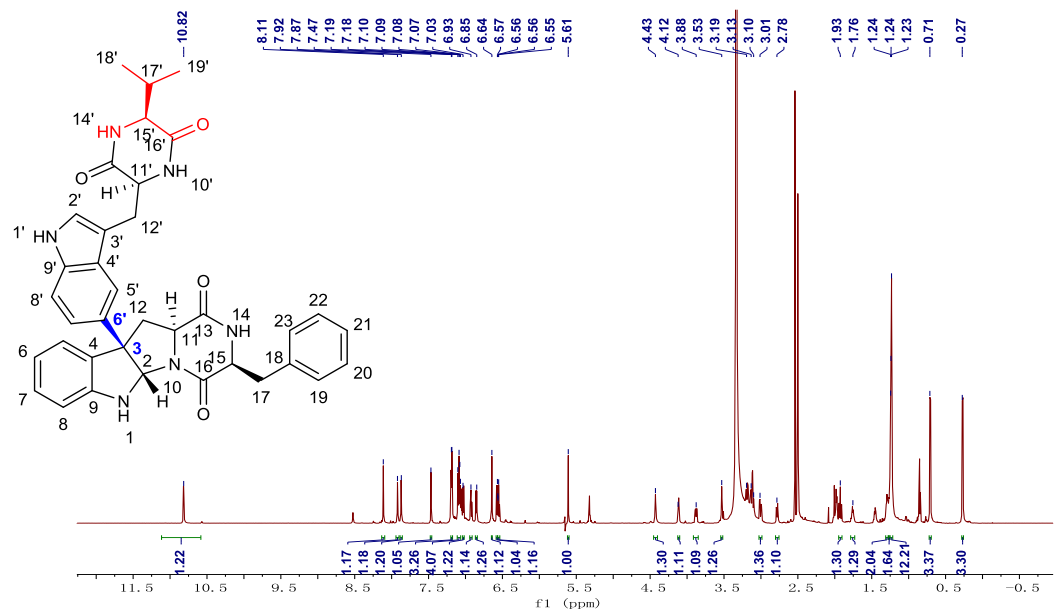**c**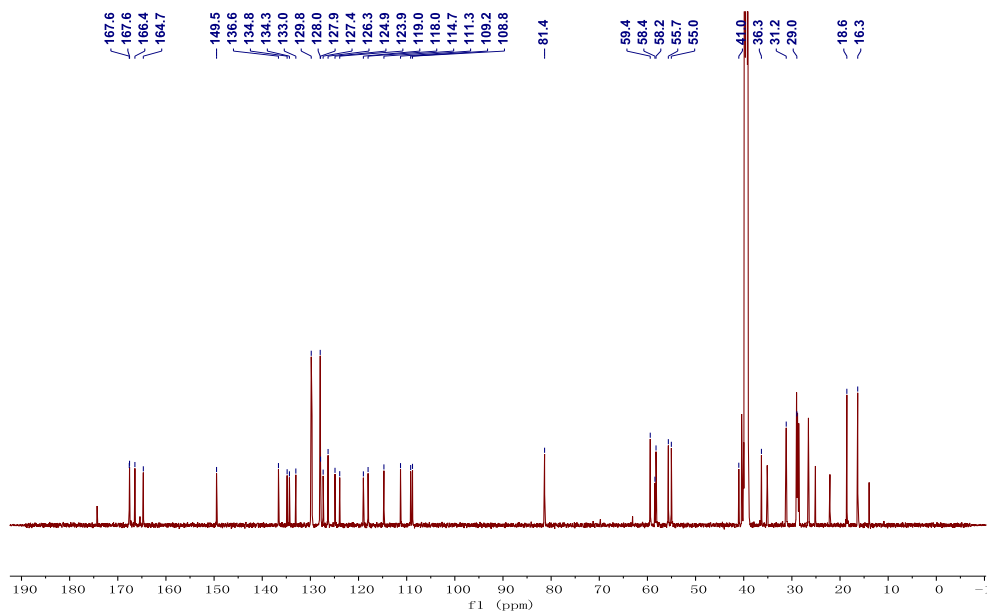

**d**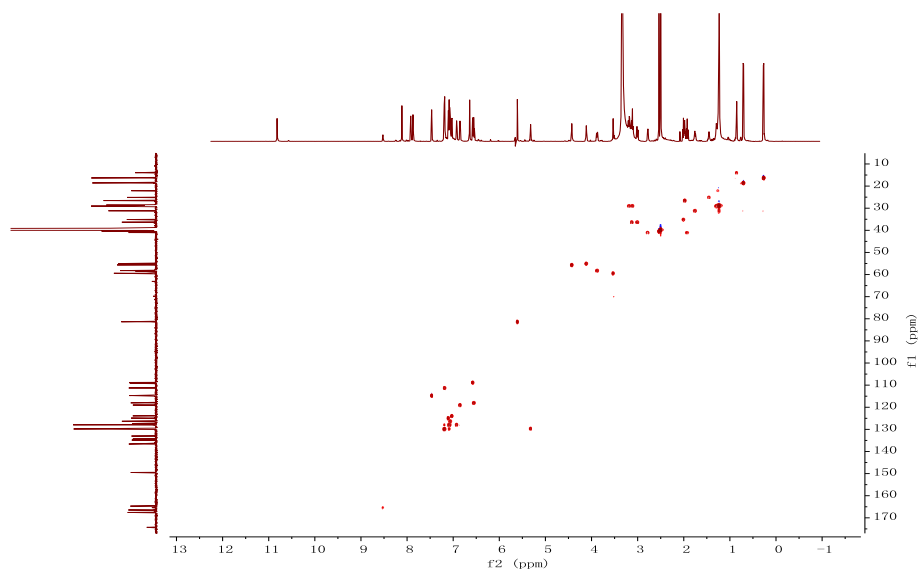**e**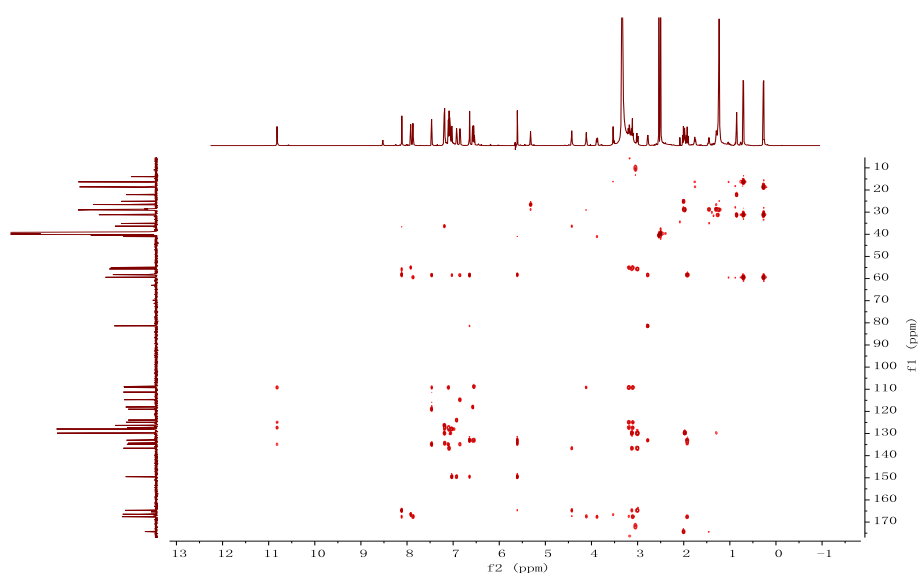**f**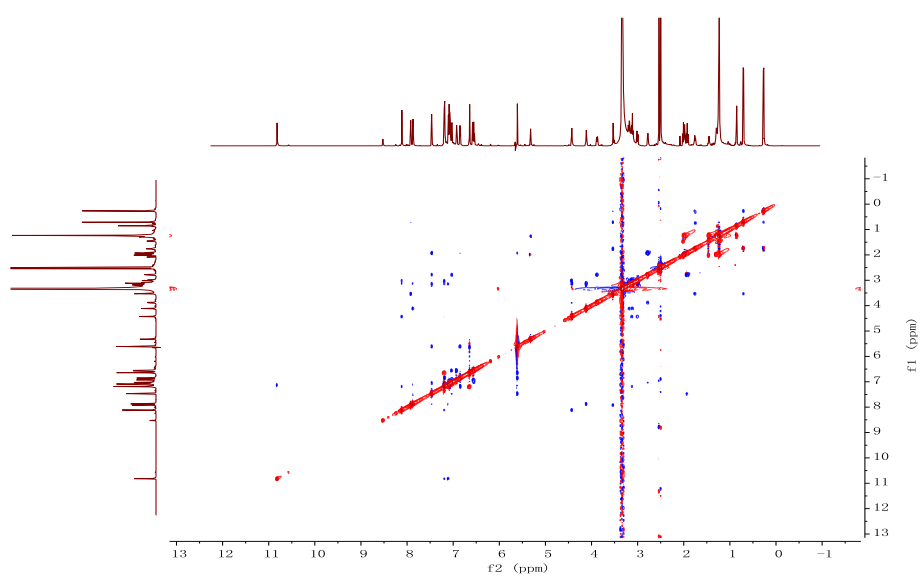

**Supplementary Figure. 37. Spectra of compound NAS-25** (a) HRESIMS of compound of NAS-25 (b)  $^1\text{H}$  NMR of compound of NAS-25 (c)  $^{13}\text{C}$  NMR of compound of NAS-25 (d) HSQC of compound of NAS-25 (e) HMBC of compound of NAS-25 (f) ROSEY of compound of NAS-25

**a**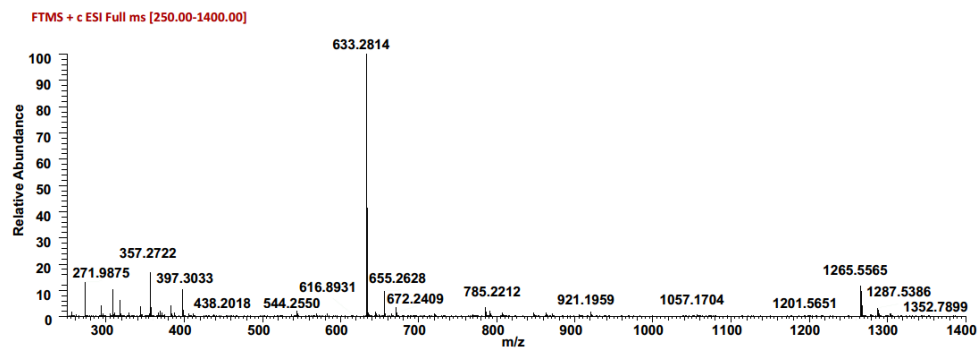**b**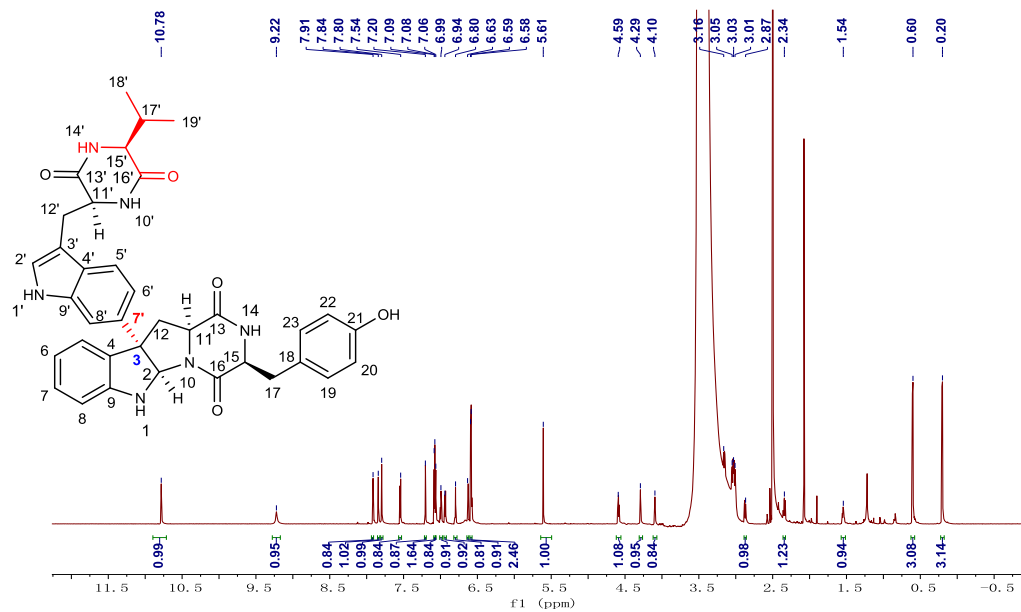**c**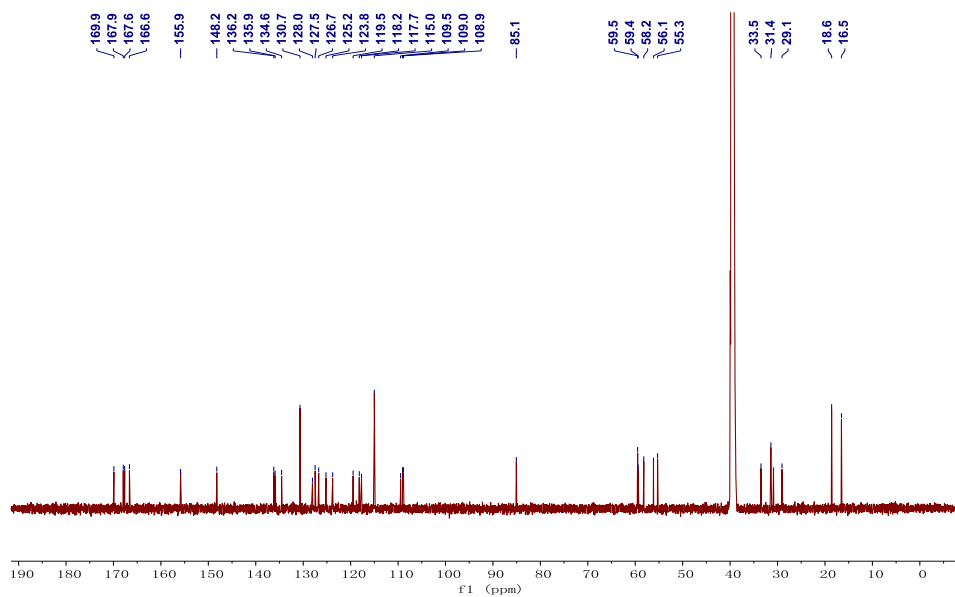

**d**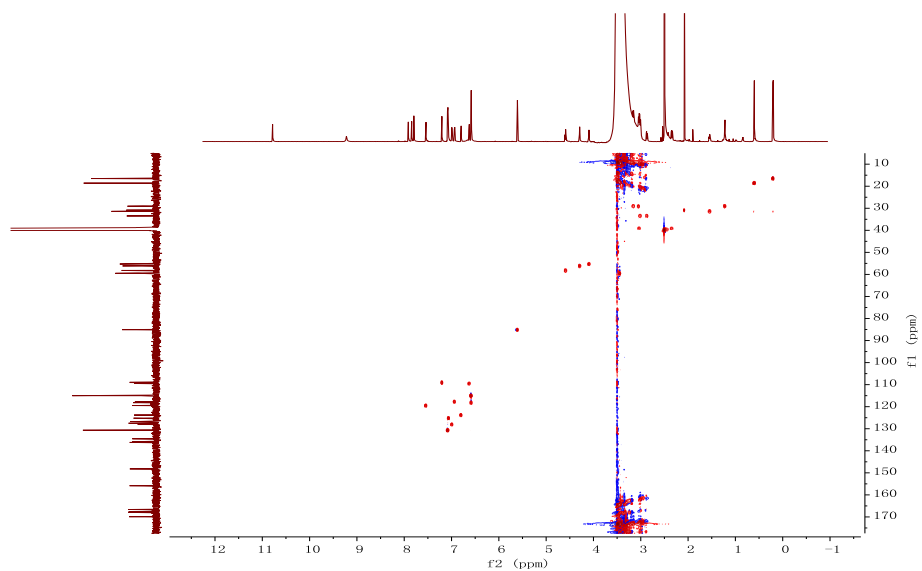**e**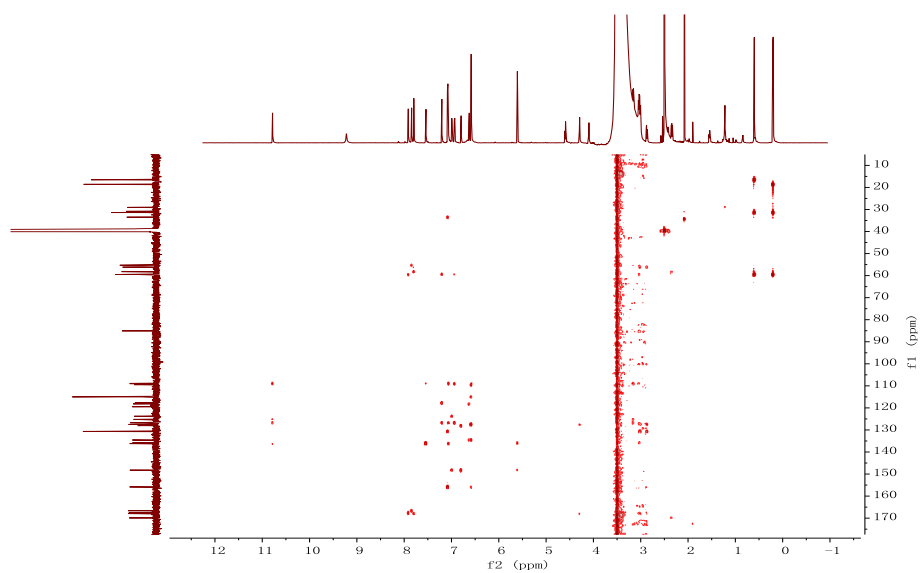**f**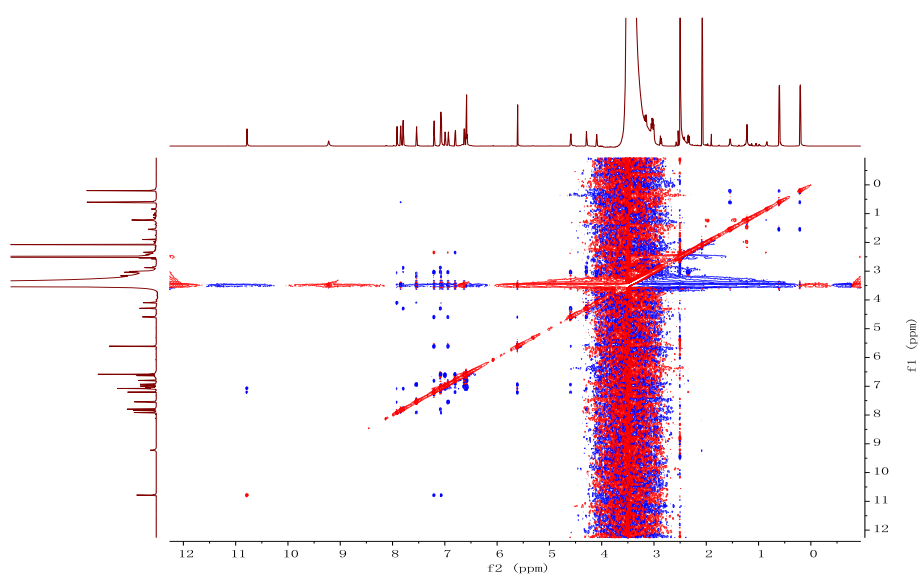

**Supplementary Figure. 38. Spectra of compound NAS-26** (a) HRESIMS of compound of NAS-26 (b)  $^1\text{H}$  NMR of compound of NAS-26 (c)  $^{13}\text{C}$  NMR of compound of NAS-26 (d) HSQC of compound of NAS-26 (e) HMBC of compound of NAS-26 (f) ROSEY of compound of NAS-26



**a**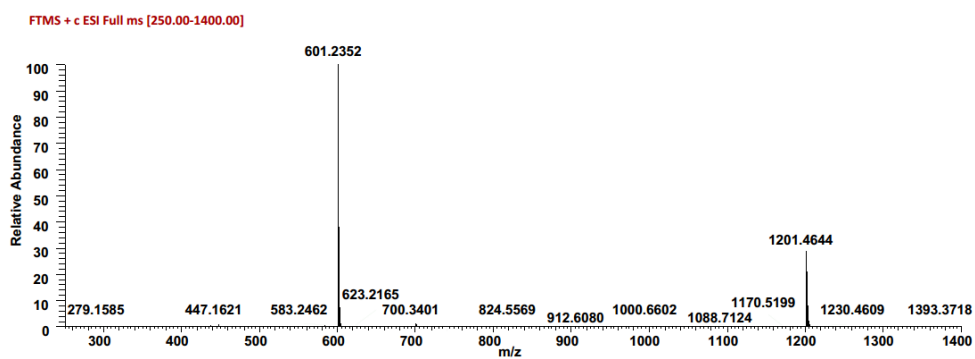**b**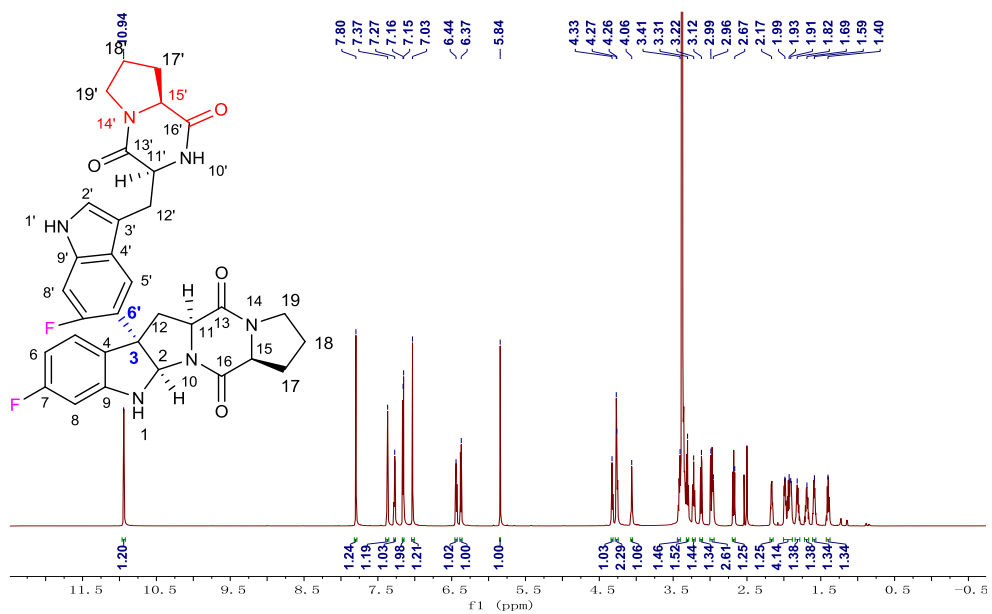**c**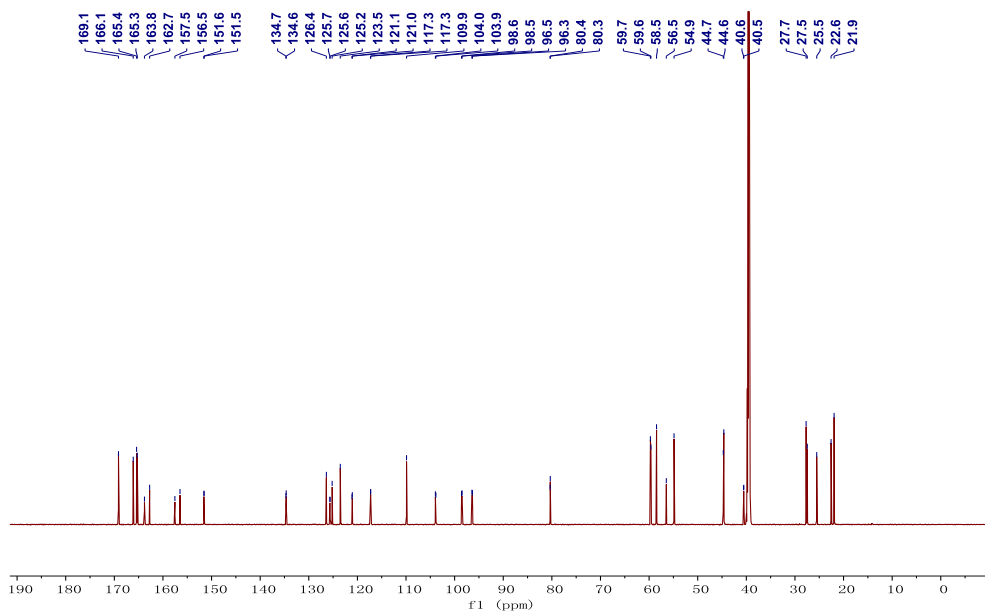

**d**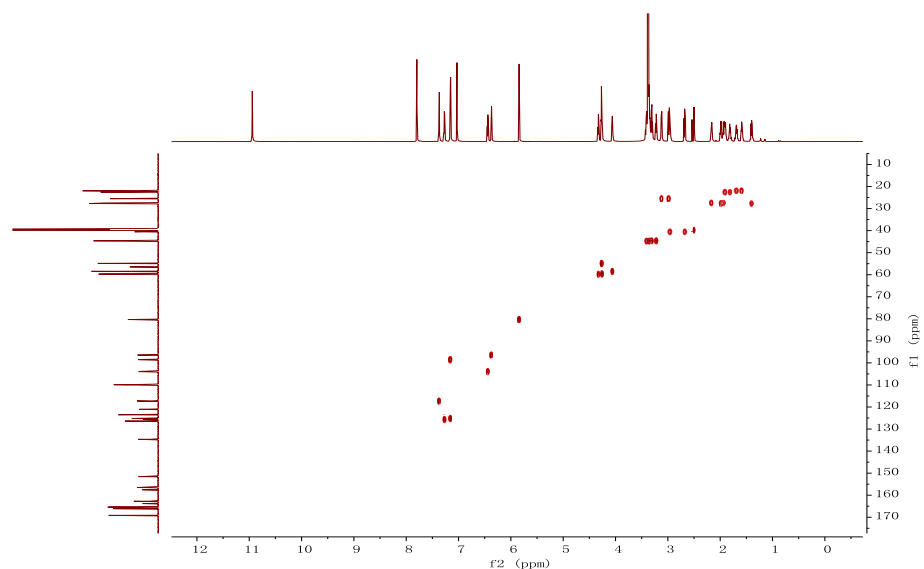**e**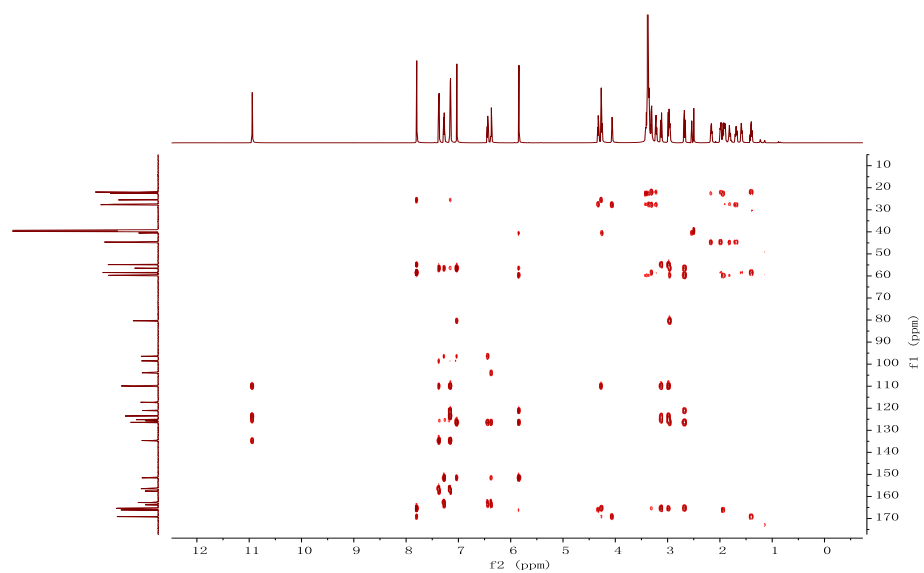**f**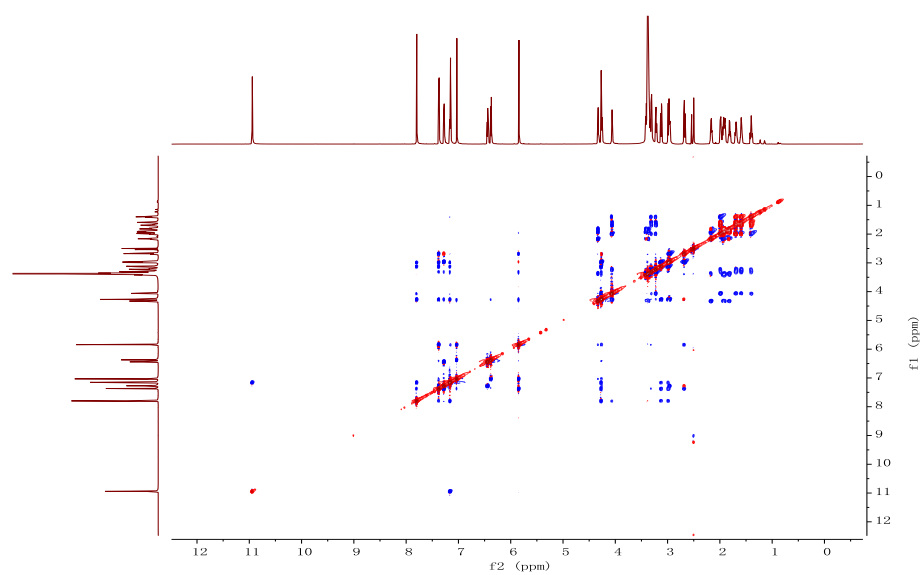

**Supplementary Figure. 39.**Spectra of compound NAS-27 (a) HRESIMS of compound of NAS-27(b)  $^1\text{H}$  NMR of compound of NAS-27(c)  $^{13}\text{C}$  NMR of compound of NAS-27(d) HSQC of compound of NAS-27 (e) HMBC of compound of NAS-27 (f) ROSEY of compound of NAS-27

**a**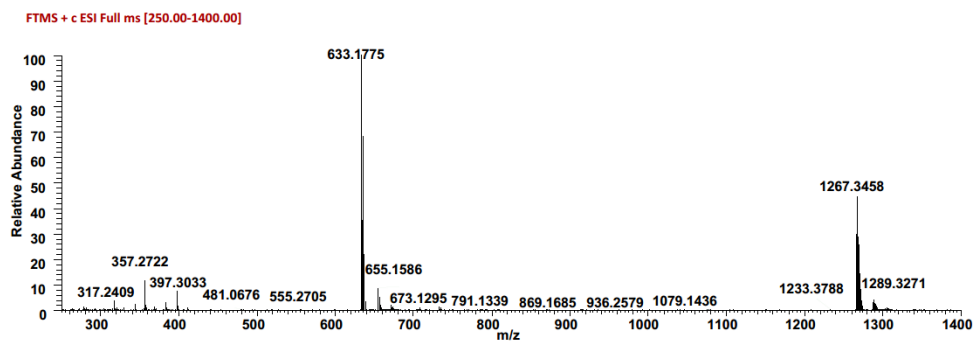**b**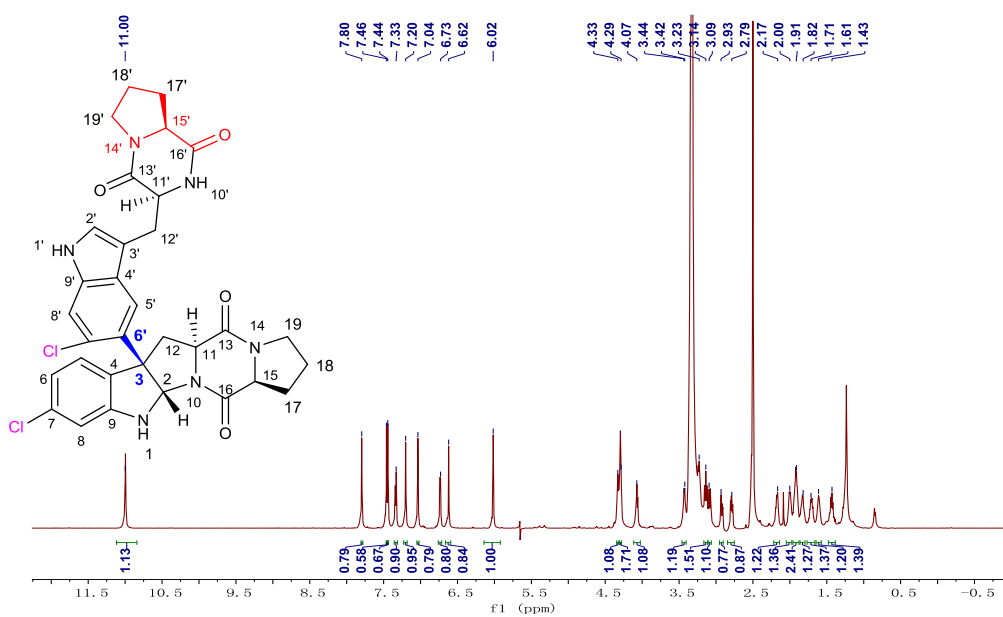**c**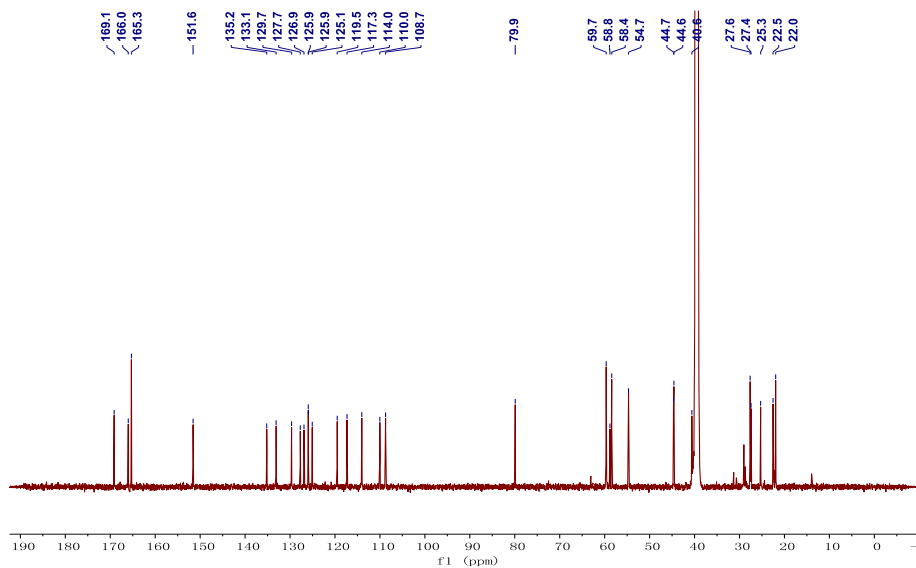

**d**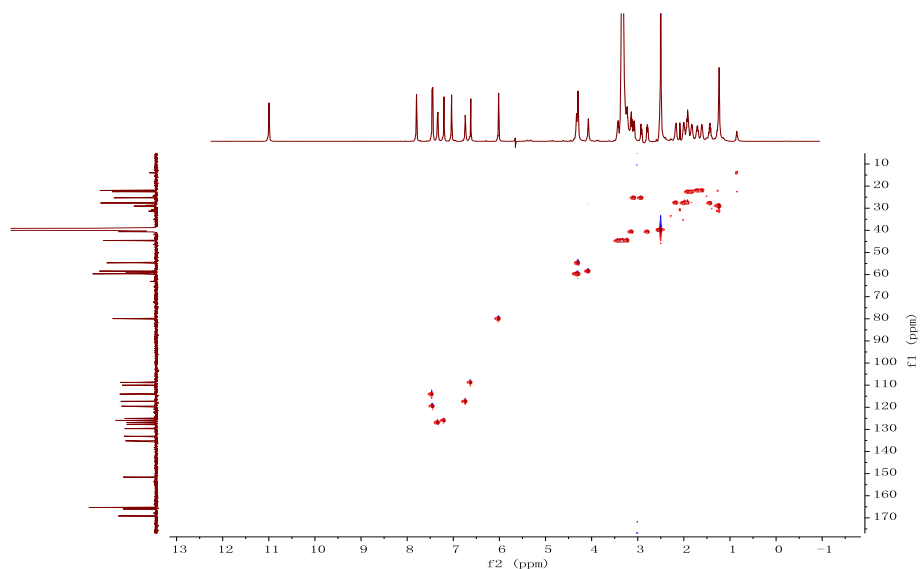**e**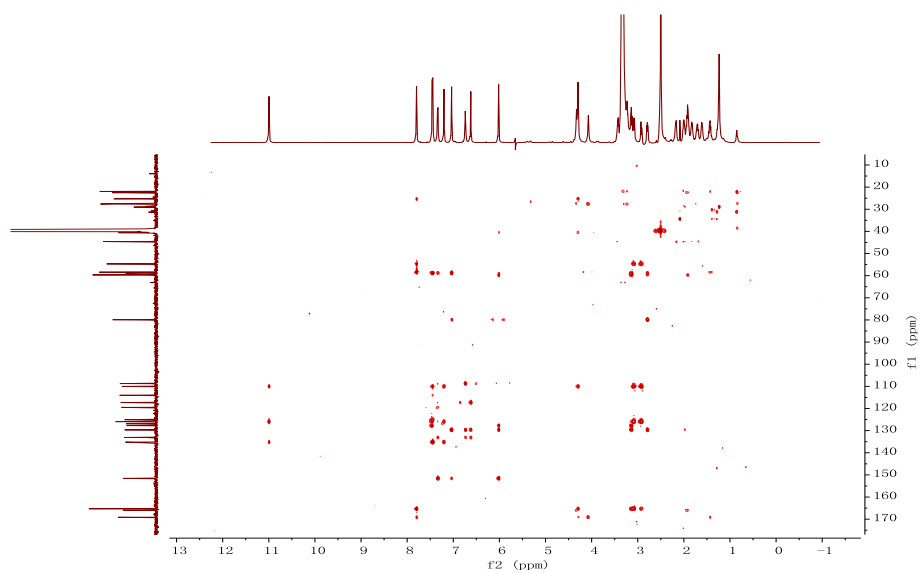**f**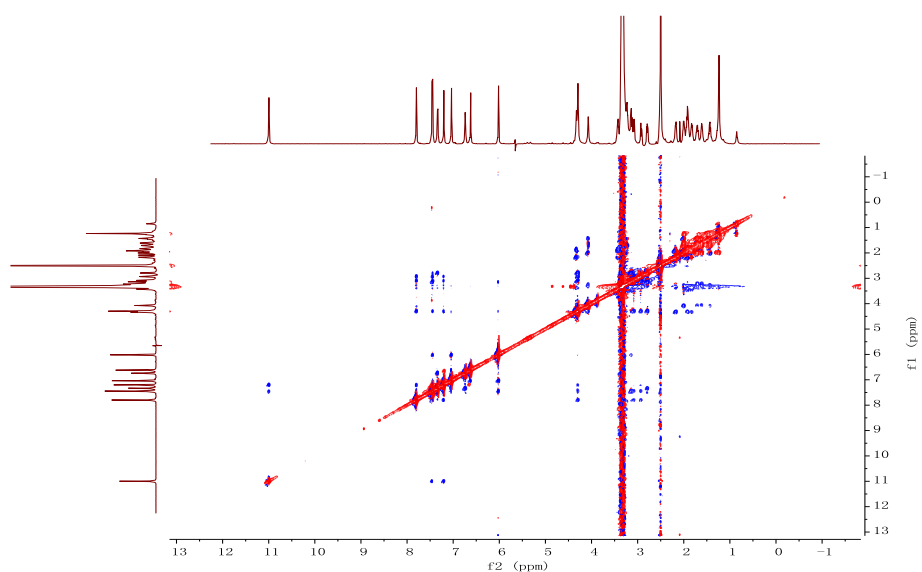

**Supplementary Figure. 40.** Spectra of compound NAS-28 (a) HRESIMS of compound of NAS-28 (b)  $^1\text{H}$  NMR of compound of NAS-28 (c)  $^{13}\text{C}$  NMR of compound of NAS-28 (d) HSQC of compound of NAS-28 (e) HMBC of compound of NAS-28 (f) ROSEY of compound of NAS-28

**a**

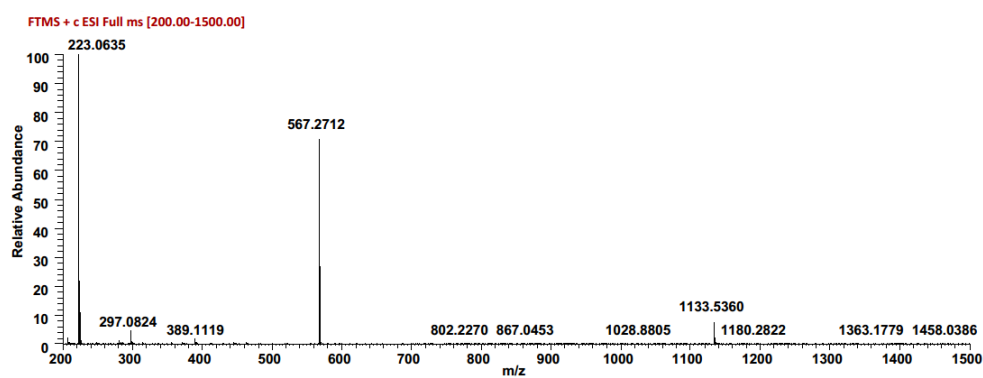

**b**

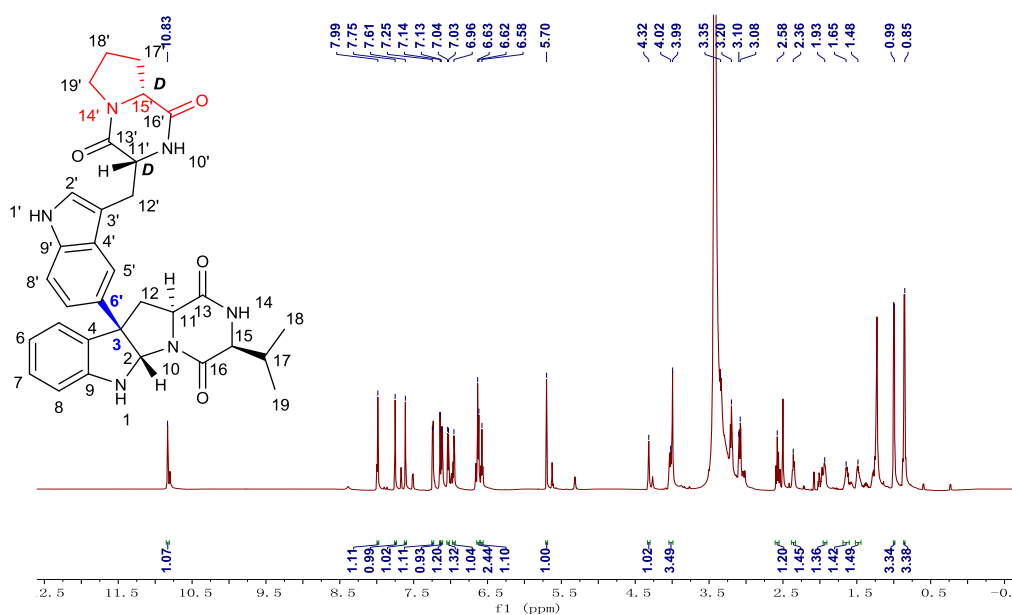

**c**

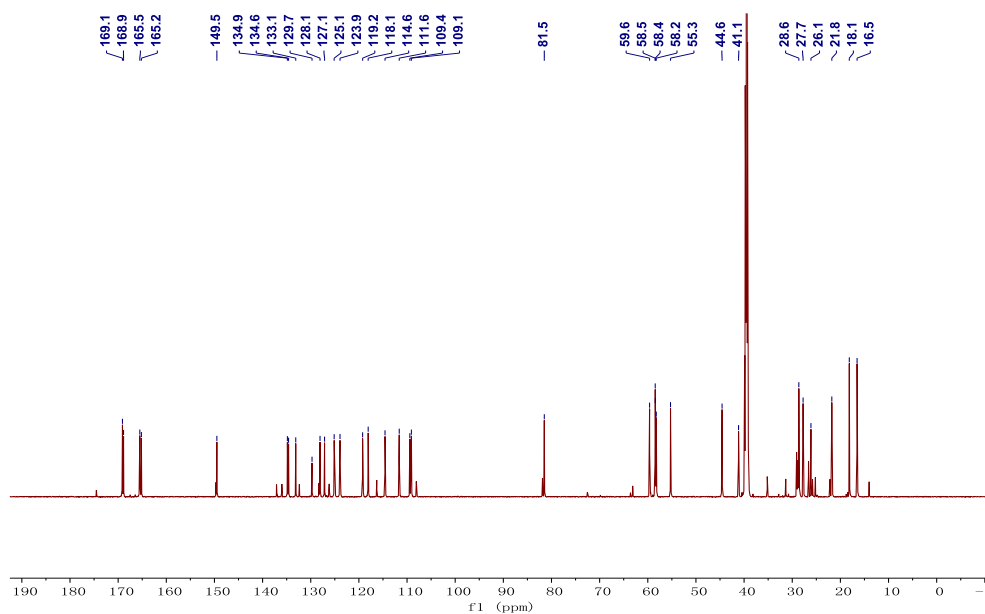

**d**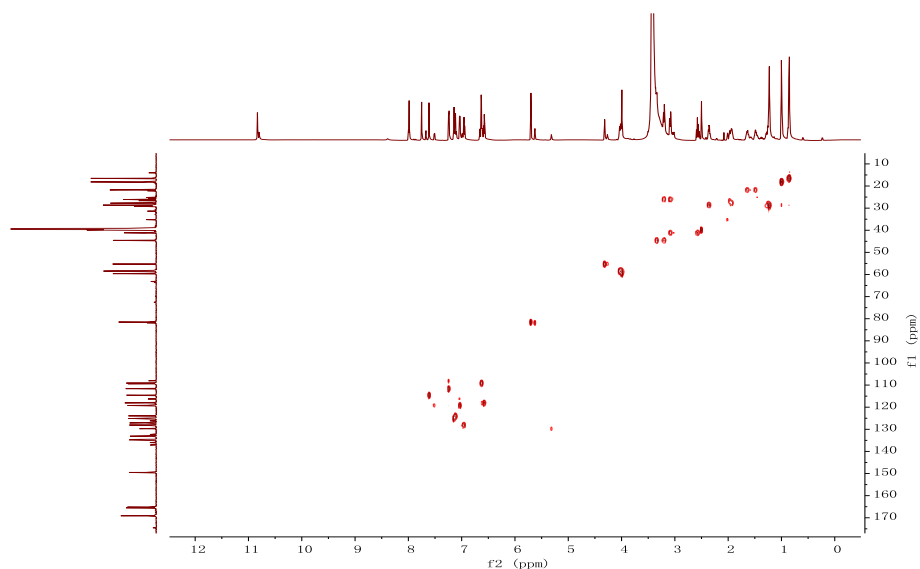**e**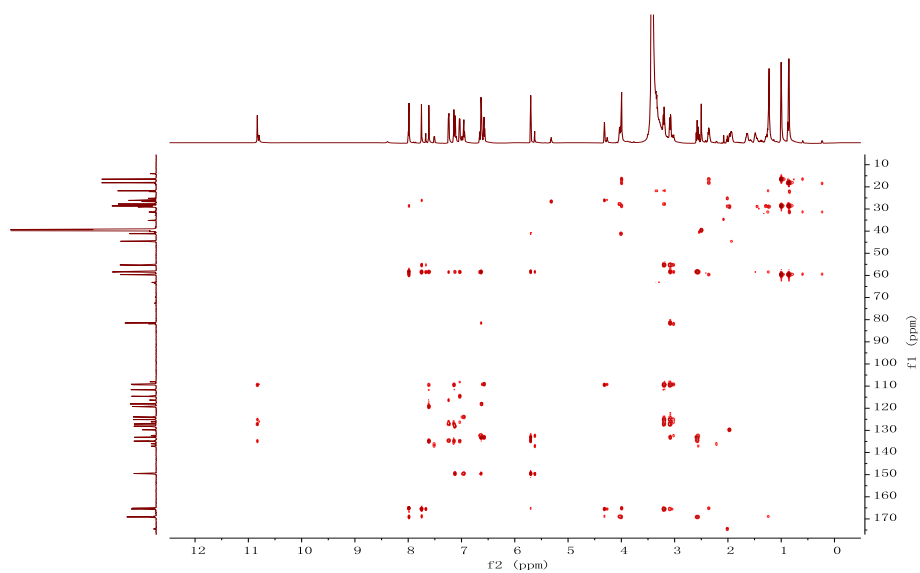**f**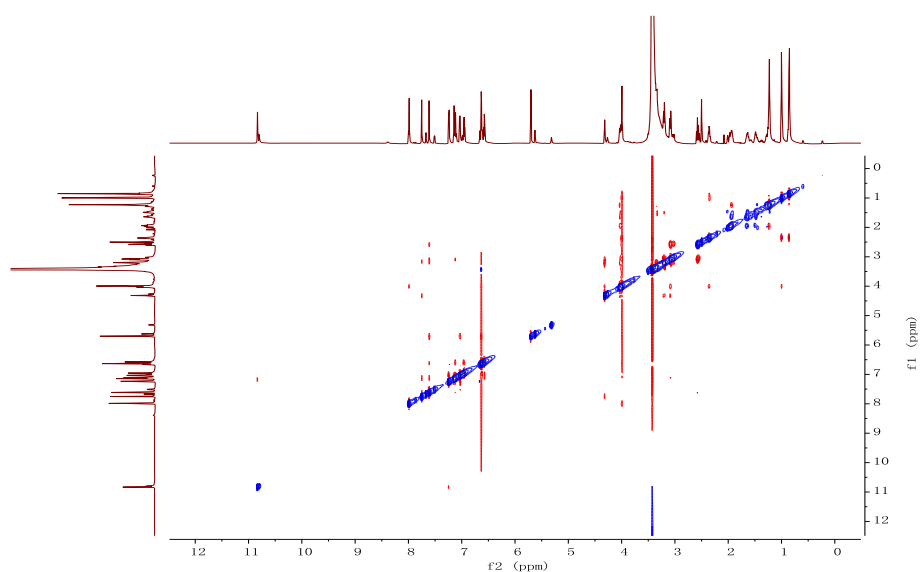

**Supplementary Figure. 41.**Spectra of compound NAS-29 (a) HRESIMS of compound of NAS-29(b)  $^1\text{H}$  NMR of compound of NAS-29(c)  $^{13}\text{C}$  NMR of compound of NAS-29(d) HSQC of compound of NAS-29 (e) HMBC of compound of NAS-29 (f) ROSEY of compound of NAS-29

**a**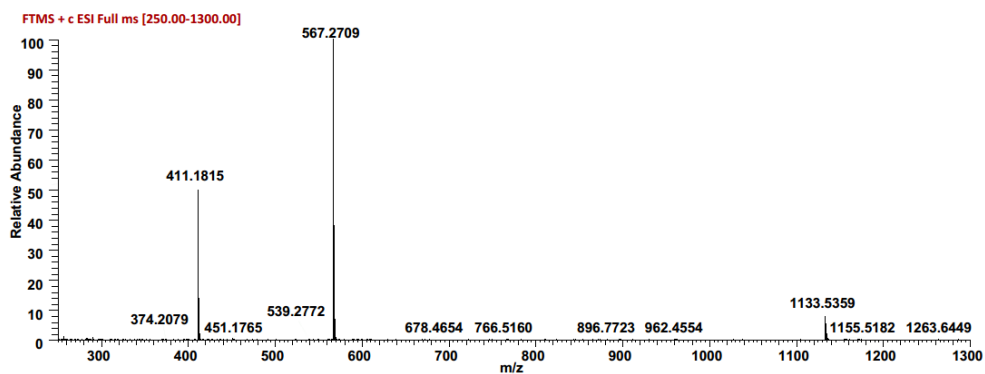**b**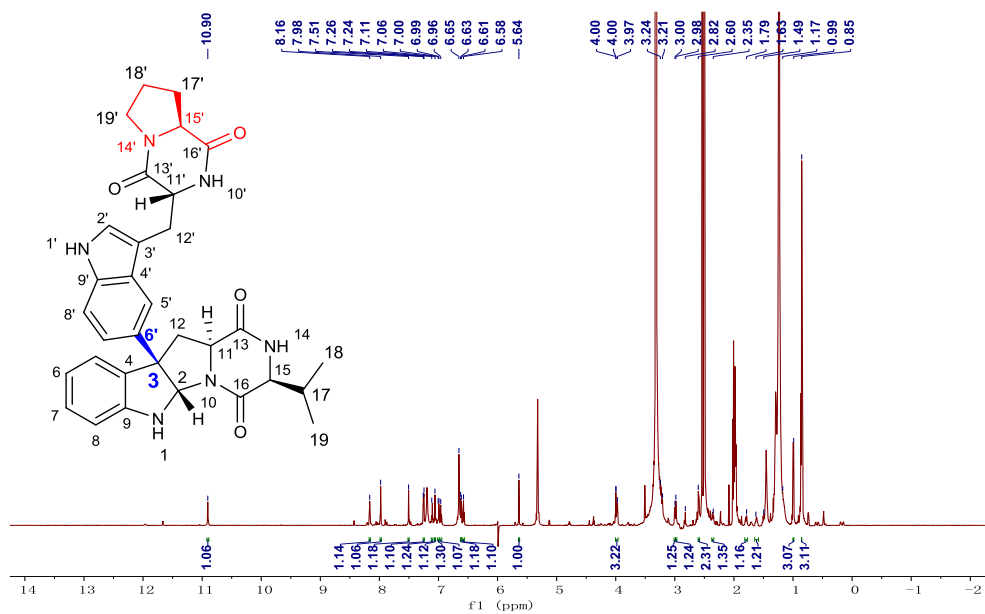**c**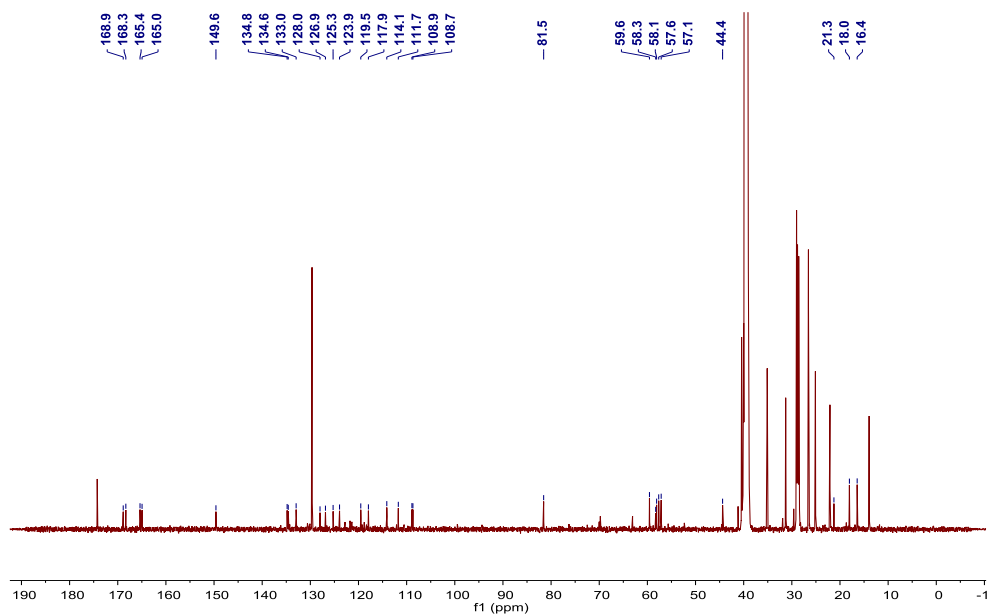

**d**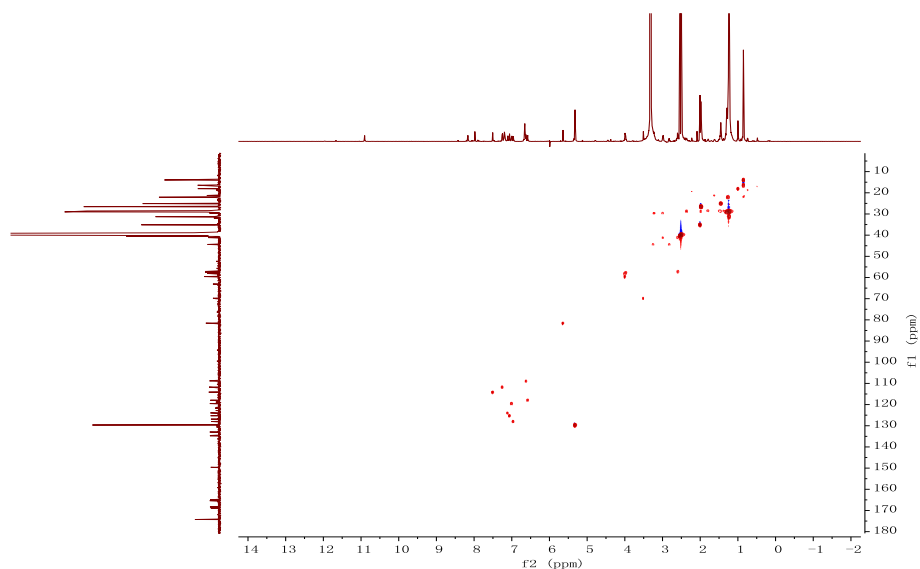**e**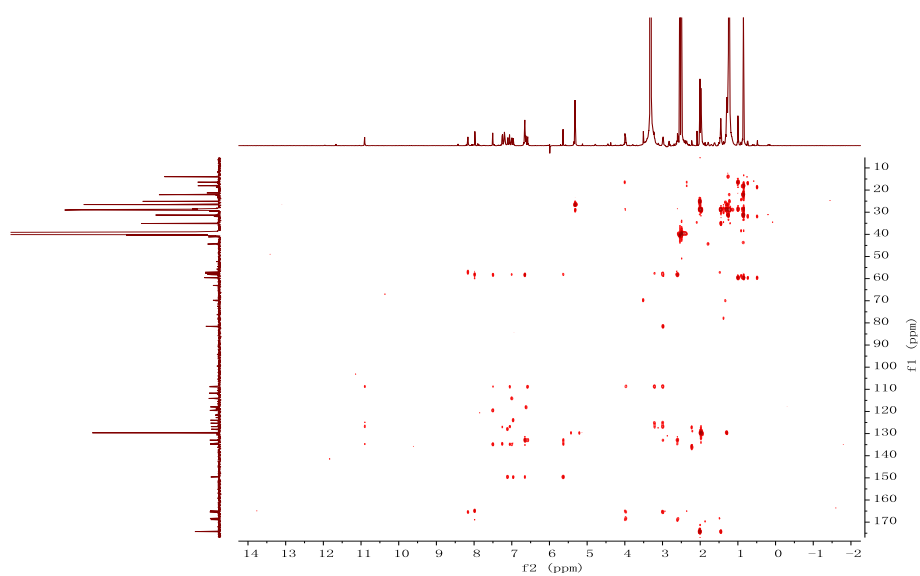**f**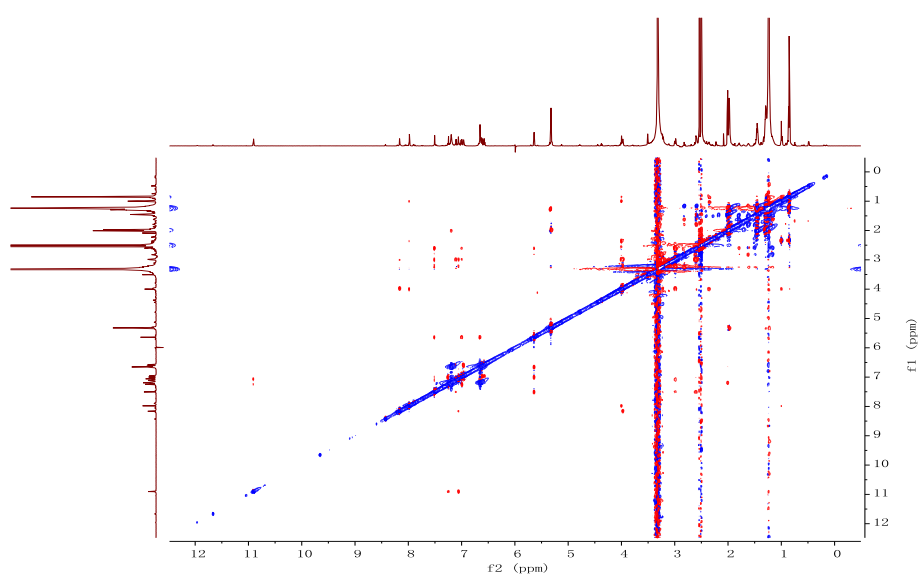

**Supplementary Figure. 42. Spectra of compound NAS-30** (a) HRESIMS of compound of NAS-30 (b)  $^1\text{H}$  NMR of compound of NAS-30 (c)  $^{13}\text{C}$  NMR of compound of NAS-30 (d) HSQC of compound of NAS-30 (e) HMBC of compound of NAS-30 (f) ROSEY of compound of NAS-30



## Supplementary Tables

**Supplementary Table 1** NascB mediated self-dimerization of cyclodipeptides

| Code | Substrate                       | Reaction | Code | Substrate                           | Reaction |
|------|---------------------------------|----------|------|-------------------------------------|----------|
| 1    | cW <sub>L</sub> -P <sub>L</sub> | YES      | 16   | cW <sub>L</sub> -K <sub>L</sub>     | NO       |
| 2    | cW <sub>L</sub> -A <sub>L</sub> | YES      | 17   | cW <sub>L</sub> -C <sub>L</sub>     | NO       |
| 3    | cW <sub>L</sub> -V <sub>L</sub> | YES      | 18   | cW <sub>L</sub> -H <sub>L</sub>     | NO       |
| 4    | cW <sub>L</sub> -G <sub>L</sub> | NO       | 19   | cW <sub>L</sub> -R <sub>L</sub>     | NO       |
| 5    | cW <sub>L</sub> -I <sub>L</sub> | NO       | 20   | cW <sub>L</sub> -W <sub>L</sub>     | NO       |
| 6    | cW <sub>L</sub> -L <sub>L</sub> | NO       | 21   | 5Cl-cW <sub>L</sub> -P <sub>L</sub> | NO       |
| 7    | cW <sub>L</sub> -F <sub>L</sub> | NO       | 22   | 6Cl-cW <sub>L</sub> -P <sub>L</sub> | NO       |
| 8    | cW <sub>L</sub> -M <sub>L</sub> | NO       | 23   | 7Cl-cW <sub>L</sub> -P <sub>L</sub> | YES      |
| 9    | cW <sub>L</sub> -S <sub>L</sub> | NO       | 24   | 8Cl-cW <sub>L</sub> -P <sub>L</sub> | NO       |
| 10   | cW <sub>L</sub> -T <sub>L</sub> | NO       | 25   | 7F-cW <sub>L</sub> -P <sub>L</sub>  | YES      |
| 11   | cW <sub>L</sub> -Y <sub>L</sub> | NO       | 26   | 6Br-cW <sub>L</sub> -P <sub>L</sub> | NO       |
| 12   | cW <sub>L</sub> -N <sub>L</sub> | NO       | 27   | cW <sub>D</sub> -P <sub>D</sub>     | NO       |
| 13   | cW <sub>L</sub> -Q <sub>L</sub> | NO       | 28   | cW <sub>D</sub> -P <sub>L</sub>     | NO       |
| 14   | cW <sub>L</sub> -D <sub>L</sub> | NO       | 29   | cW <sub>L</sub> -P <sub>D</sub>     | NO       |
| 15   | cW <sub>L</sub> -E <sub>L</sub> | NO       | 30   | Oxo-cW <sub>L</sub> -P <sub>L</sub> | NO       |

**Supplementary Table 2** The reaction of cW<sub>L</sub>-A<sub>L</sub> with other cyclodipeptides

| Code | Substrate                       | cW <sub>L</sub> -A <sub>L</sub> | Code | Substrate                           | cW <sub>L</sub> -A <sub>L</sub> |
|------|---------------------------------|---------------------------------|------|-------------------------------------|---------------------------------|
| 1    | cW <sub>L</sub> -P <sub>L</sub> | YES                             | 16   | cW <sub>L</sub> -K <sub>L</sub>     | NO                              |
| 2    | cW <sub>L</sub> -A <sub>L</sub> | YES                             | 17   | cW <sub>L</sub> -C <sub>L</sub>     | NO                              |
| 3    | cW <sub>L</sub> -V <sub>L</sub> | YES                             | 18   | cW <sub>L</sub> -H <sub>L</sub>     | NO                              |
| 4    | cW <sub>L</sub> -G <sub>L</sub> | NO                              | 19   | cW <sub>L</sub> -R <sub>L</sub>     | NO                              |
| 5    | cW <sub>L</sub> -I <sub>L</sub> | YES                             | 20   | cW <sub>L</sub> -W <sub>L</sub>     | NO                              |
| 6    | cW <sub>L</sub> -L <sub>L</sub> | YES                             | 21   | 5Cl-cW <sub>L</sub> -P <sub>L</sub> | NO                              |
| 7    | cW <sub>L</sub> -F <sub>L</sub> | YES                             | 22   | 6Cl-cW <sub>L</sub> -P <sub>L</sub> | NO                              |
| 8    | cW <sub>L</sub> -M <sub>L</sub> | YES                             | 23   | 7Cl-cW <sub>L</sub> -P <sub>L</sub> | NO                              |
| 9    | cW <sub>L</sub> -S <sub>L</sub> | NO                              | 24   | 8Cl-cW <sub>L</sub> -P <sub>L</sub> | NO                              |
| 10   | cW <sub>L</sub> -T <sub>L</sub> | NO                              | 25   | 7F-cW <sub>L</sub> -P <sub>L</sub>  | NO                              |
| 11   | cW <sub>L</sub> -Y <sub>L</sub> | NO                              | 26   | 6Br-cW <sub>L</sub> -P <sub>L</sub> | NO                              |
| 12   | cW <sub>L</sub> -N <sub>L</sub> | NO                              | 27   | cW <sub>D</sub> -P <sub>D</sub>     | NO                              |
| 13   | cW <sub>L</sub> -Q <sub>L</sub> | NO                              | 28   | cW <sub>D</sub> -P <sub>L</sub>     | NO                              |
| 14   | cW <sub>L</sub> -D <sub>L</sub> | NO                              | 29   | cW <sub>L</sub> -P <sub>D</sub>     | NO                              |
| 15   | cW <sub>L</sub> -E <sub>L</sub> | NO                              |      |                                     |                                 |

**Supplementary Table 3** The reaction of cW<sub>L</sub>-P<sub>L</sub> with other cyclodipeptides

| <b>Code</b> | <b>Substrate</b>                | <b>cW<sub>L</sub>-P<sub>L</sub></b> | <b>Code</b> | <b>Substrate</b>                    | <b>cW<sub>L</sub>-P<sub>L</sub></b> |
|-------------|---------------------------------|-------------------------------------|-------------|-------------------------------------|-------------------------------------|
| 1           | cW <sub>L</sub> -P <sub>L</sub> | YES                                 | 16          | cW <sub>L</sub> -K <sub>L</sub>     | NO                                  |
| 2           | cW <sub>L</sub> -A <sub>L</sub> | YES                                 | 17          | cW <sub>L</sub> -C <sub>L</sub>     | NO                                  |
| 3           | cW <sub>L</sub> -V <sub>L</sub> | YES                                 | 18          | cW <sub>L</sub> -H <sub>L</sub>     | NO                                  |
| 4           | cW <sub>L</sub> -G <sub>L</sub> | NO                                  | 19          | cW <sub>L</sub> -R <sub>L</sub>     | NO                                  |
| 5           | cW <sub>L</sub> -I <sub>L</sub> | YES                                 | 20          | cW <sub>L</sub> -W <sub>L</sub>     | NO                                  |
| 6           | cW <sub>L</sub> -L <sub>L</sub> | YES                                 | 21          | 5Cl-cW <sub>L</sub> -P <sub>L</sub> | NO                                  |
| 7           | cW <sub>L</sub> -F <sub>L</sub> | YES                                 | 22          | 6Cl-cW <sub>L</sub> -P <sub>L</sub> | NO                                  |
| 8           | cW <sub>L</sub> -M <sub>L</sub> | YES                                 | 23          | 7Cl-cW <sub>L</sub> -P <sub>L</sub> | NO                                  |
| 9           | cW <sub>L</sub> -S <sub>L</sub> | NO                                  | 24          | 8Cl-cW <sub>L</sub> -P <sub>L</sub> | NO                                  |
| 10          | cW <sub>L</sub> -T <sub>L</sub> | NO                                  | 25          | 7F-cW <sub>L</sub> -P <sub>L</sub>  | NO                                  |
| 11          | cW <sub>L</sub> -Y <sub>L</sub> | NO                                  | 26          | 6Br-cW <sub>L</sub> -P <sub>L</sub> | NO                                  |
| 12          | cW <sub>L</sub> -N <sub>L</sub> | NO                                  | 27          | cW <sub>D</sub> -P <sub>D</sub>     | NO                                  |
| 13          | cW <sub>L</sub> -Q <sub>L</sub> | NO                                  | 28          | cW <sub>D</sub> -P <sub>L</sub>     | NO                                  |
| 14          | cW <sub>L</sub> -D <sub>L</sub> | NO                                  | 29          | cW <sub>L</sub> -P <sub>D</sub>     | NO                                  |
| 15          | cW <sub>L</sub> -E <sub>L</sub> | NO                                  |             |                                     |                                     |

**Supplementary Table 4** The reaction of cW<sub>L</sub>-V<sub>L</sub> with other cyclodipeptides

| <b>Code</b> | <b>Substrate</b>                | <b>cW<sub>L</sub>-V<sub>L</sub></b> | <b>Code</b> | <b>Substrate</b>                    | <b>cW<sub>L</sub>-V<sub>L</sub></b> |
|-------------|---------------------------------|-------------------------------------|-------------|-------------------------------------|-------------------------------------|
| 1           | cW <sub>L</sub> -P <sub>L</sub> | YES                                 | 16          | cW <sub>L</sub> -K <sub>L</sub>     | NO                                  |
| 2           | cW <sub>L</sub> -A <sub>L</sub> | YES                                 | 17          | cW <sub>L</sub> -C <sub>L</sub>     | NO                                  |
| 3           | cW <sub>L</sub> -V <sub>L</sub> | YES                                 | 18          | cW <sub>L</sub> -H <sub>L</sub>     | NO                                  |
| 4           | cW <sub>L</sub> -G <sub>L</sub> | NO                                  | 19          | cW <sub>L</sub> -R <sub>L</sub>     | NO                                  |
| 5           | cW <sub>L</sub> -I <sub>L</sub> | YES                                 | 20          | cW <sub>L</sub> -W <sub>L</sub>     | NO                                  |
| 6           | cW <sub>L</sub> -L <sub>L</sub> | YES                                 | 21          | 5Cl-cW <sub>L</sub> -P <sub>L</sub> | NO                                  |
| 7           | cW <sub>L</sub> -F <sub>L</sub> | YES                                 | 22          | 6Cl-cW <sub>L</sub> -P <sub>L</sub> | NO                                  |
| 8           | cW <sub>L</sub> -M <sub>L</sub> | YES                                 | 23          | 7Cl-cW <sub>L</sub> -P <sub>L</sub> | NO                                  |
| 9           | cW <sub>L</sub> -S <sub>L</sub> | YES                                 | 24          | 8Cl-cW <sub>L</sub> -P <sub>L</sub> | NO                                  |
| 10          | cW <sub>L</sub> -T <sub>L</sub> | YES                                 | 25          | 7F-cW <sub>L</sub> -P <sub>L</sub>  | NO                                  |
| 11          | cW <sub>L</sub> -Y <sub>L</sub> | YES                                 | 26          | 6Br-cW <sub>L</sub> -P <sub>L</sub> | NO                                  |
| 12          | cW <sub>L</sub> -N <sub>L</sub> | NO                                  | 27          | cW <sub>D</sub> -P <sub>D</sub>     | YES                                 |
| 13          | cW <sub>L</sub> -Q <sub>L</sub> | NO                                  | 28          | cW <sub>D</sub> -P <sub>L</sub>     | YES                                 |
| 14          | cW <sub>L</sub> -D <sub>L</sub> | NO                                  | 29          | cW <sub>L</sub> -P <sub>D</sub>     | NO                                  |
| 15          | cW <sub>L</sub> -E <sub>L</sub> | NO                                  |             |                                     |                                     |

**Supplementary Table 5** The protective effect of compounds NAS-1-28 against A $\beta$ 25-35 (A4559)-induced PC-12 cells damage (Anti-Alzheimer model)

| <b>Name</b>      | <b>Concentration (<math>\mu</math>M)</b> | <b>Inhibition Rate (%)</b> |
|------------------|------------------------------------------|----------------------------|
| NAS-1            | 10                                       | 51.05 $\pm$ 2.73           |
| NAS-2            | 10                                       | 48.69 $\pm$ 2.84           |
| NAS-3            | 10                                       | 46.30 $\pm$ 2.96           |
| NAS-4            | 10                                       | 47.49 $\pm$ 2.90           |
| NAS-5            | 10                                       | 52.27 $\pm$ 2.67           |
| NAS-6            | 10                                       | 47.49 $\pm$ 2.90           |
| NAS-7            | 10                                       | 53.46 $\pm$ 2.62           |
| NAS-8            | 10                                       | 52.27 $\pm$ 3.22           |
| NAS-9            | 10                                       | 47.49 $\pm$ 2.90           |
| NAS-10           | 10                                       | 49.88 $\pm$ 2.78           |
| NAS-11           | 10                                       | 46.30 $\pm$ 2.96           |
| NAS-12           | 10                                       | 47.49 $\pm$ 2.90           |
| NAS-13           | 10                                       | 52.27 $\pm$ 2.67           |
| NAS-14           | 10                                       | 48.68 $\pm$ 2.84           |
| NAS-15           | 10                                       | 49.50 $\pm$ 0.00           |
| NAS-16           | 10                                       | 45.11 $\pm$ 3.06           |
| NAS-17           | 10                                       | 48.69 $\pm$ 3.36           |
| NAS-18           | 10                                       | 47.49 $\pm$ 2.90           |
| NAS-19           | 10                                       | 47.49 $\pm$ 2.90           |
| NAS-20           | 10                                       | 46.30 $\pm$ 2.96           |
| NAS-21           | 10                                       | 50.07 $\pm$ 3.26           |
| NAS-22           | 10                                       | 51.07 $\pm$ 2.73           |
| NAS-23           | 10                                       | 51.06 $\pm$ 0.00           |
| NAS-24           | 10                                       | 50.06 $\pm$ 3.24           |
| NAS-25           | 10                                       | 51.04 $\pm$ 2.73           |
| NAS-26           | 10                                       | 48.69 $\pm$ 3.36           |
| NAS-27           | 10                                       | 47.49 $\pm$ 2.90           |
| NAS-28           | 10                                       | 50.07 $\pm$ 3.26           |
| Blank            | -                                        | -                          |
| Negative Control | -                                        | 49.88 $\pm$ 2.78           |

**Supplementary Table 6** The protective effects of compounds NAS-1-28 against glutamate-induced PC-12 cells apoptosis (Neuron protection model).

| <b>Name</b>      | <b>Concentration (<math>\mu\text{M}</math>)</b> | <b>Inhibition Rate (%)</b> |
|------------------|-------------------------------------------------|----------------------------|
| NAS-1            | 10                                              | 36.57 $\pm$ 2.24           |
| NAS-2            | 10                                              | 43.70 $\pm$ 2.26           |
| NAS-3            | 10                                              | 37.21 $\pm$ 1.47           |
| NAS-4            | 10                                              | 41.51 $\pm$ 4.86           |
| NAS-5            | 10                                              | 42.81 $\pm$ 2.23           |
| NAS-6            | 10                                              | 44.56 $\pm$ 2.66           |
| NAS-7            | 10                                              | 35.11 $\pm$ 2.24           |
| NAS-8            | 10                                              | 42.61 $\pm$ 2.94           |
| NAS-9            | 10                                              | 38.57 $\pm$ 2.76           |
| NAS-10           | 10                                              | 32.73 $\pm$ 2.83           |
| NAS-11           | 10                                              | 33.00 $\pm$ 4.92           |
| NAS-12           | 10                                              | 29.01 $\pm$ 1.67           |
| NAS-13           | 10                                              | 37.54 $\pm$ 2.24           |
| NAS-14           | 10                                              | 42.11 $\pm$ 2.27           |
| NAS-15           | 10                                              | 40.61 $\pm$ 2.90           |
| NAS-16           | 10                                              | 34.54 $\pm$ 2.79           |
| NAS-17           | 10                                              | 44.00 $\pm$ 4.86           |
| NAS-18           | 10                                              | 41.92 $\pm$ 1.20           |
| NAS-19           | 10                                              | 41.47 $\pm$ 4.86           |
| NAS-20           | 10                                              | 42.89 $\pm$ 4.86           |
| NAS-21           | 10                                              | 41.25 $\pm$ 2.27           |
| NAS-22           | 10                                              | 41.21 $\pm$ 2.27           |
| NAS-23           | 10                                              | 49.43 $\pm$ 0.89           |
| NAS-24           | 10                                              | 40.61 $\pm$ 1.55           |
| NAS-25           | 10                                              | 35.93 $\pm$ 2.29           |
| NAS-26           | 10                                              | 48.62 $\pm$ 2.24           |
| NAS-27           | 10                                              | 29.88 $\pm$ 2.87           |
| NAS-28           | 10                                              | 47.98 $\pm$ 1.65           |
| Nimodipine       | 20                                              | 33.30 $\pm$ 2.79           |
| Blank            | -                                               | -                          |
| Negative Control | -                                               | 42.04 $\pm$ 4.86           |

**Supplementary Table 7** Bacterial strains and plasmids used in this study

| <b>Strains</b>             | <b>Description</b>                               | <b>Source</b> |
|----------------------------|--------------------------------------------------|---------------|
| <b><i>E. coli</i></b>      |                                                  |               |
| DH5α                       | Host for general cloning                         | Invitrogen    |
| BL21(DE3)                  | Host for protein expression                      | Invitrogen    |
| Rossette (DE3)             | Host for protein expression                      | Invitrogen    |
| JM109 (DE3)                | Host for protein expression                      | Promega       |
| C41 (DE3)                  | Host for protein expression                      | Sigma         |
| C43 (DE3)                  | Host for protein expression                      | Sigma         |
| BL21 (DE3) pLysE           | Host for protein expression                      | Thermo        |
| ET12567/pUZ8002            | Donor strain for conjugation                     | ATCC          |
| GB05-dir                   | Host for PCR-targeting                           | <sup>3</sup>  |
| GB05-dir-T7                | Host for protein expression                      | This study    |
| <b><i>Streptomyces</i></b> |                                                  |               |
| sp. CMB-MQ030              | NAZ-A, NAZ-B producer                            | Prof. Capon   |
| <i>albus</i> J1074         | Host for heterologous expression                 | Lab storage   |
| <i>lividans</i> TK24       | Host for heterologous expression                 | Lab storage   |
| <i>coelicolor</i> M1154    | Host for heterologous expression                 | Lab storage   |
| mWHU2475                   | <i>S. albus</i> J1074 contains pWHU2482          | This study    |
| mWHU2476                   | <i>S. lividans</i> TK24 contains pWHU2482        | This study    |
| mWHU2477                   | <i>S. coelicolor</i> M1154 contains pWHU2482     | This study    |
| mWHU2478                   | <i>S. albus</i> J1074 contains pWHU2483          | This study    |
| mWHU2479                   | <i>S. lividans</i> TK24 contains pWHU2483        | This study    |
| mWHU2480                   | <i>S. coelicolor</i> M1154 contains pWHU2483     | This study    |
| mWHU2481                   | <i>S. albus</i> J1074 contains pIB139            | This study    |
| mWHU2482                   | <i>S. lividans</i> TK24 contains pIB139          | This study    |
| mWHU2483                   | <i>S. coelicolor</i> M1154 contains pIB139       | This study    |
| <b>Plasmids</b>            |                                                  |               |
| pSP72                      | <i>E. coli</i> cloning vector                    | Promega       |
| pET28a                     | Protein expression vector in <i>E. coli</i>      | Novagen       |
| pET21a                     | Protein expression vector in <i>E. coli</i>      | Novagen       |
| pSJ5                       | Protein expression vector in <i>E. coli</i>      | Lab storage   |
| pSJ8                       | Protein expression vector in <i>E. coli</i>      | Lab storage   |
| pRSF-Duet                  | Protein expression vector in <i>E. coli</i> with | Novagen       |

|                    |                                                                                                                  |            |
|--------------------|------------------------------------------------------------------------------------------------------------------|------------|
|                    | two MCS                                                                                                          |            |
| pET-Duet           | Protein expression vector in <i>E. coli</i> with two MCS                                                         | Novagen    |
| pB139              | Plasmid for heterologous expression in <i>Streptomyces</i>                                                       | 4          |
| pTRX-Fd            | pSJ5 derivative for Spinach ferredoxin expression in <i>E. coli</i>                                              | This study |
| pMBP-FdR           | pSJ8 derivative for Spinach ferredoxin reductase expression in <i>E. coli</i>                                    | This study |
| pETDuet-saFdR1     | pET-Duet derivative, contains <i>S. albus</i> ferredoxin reductase 1                                             | This study |
| pETDuet-saFdR2     | pET-Duet derivative, contains <i>S. albus</i> ferredoxin reductase 2                                             | This study |
| pETDuet-saFdR3     | pET-Duet derivative, contains <i>S. albus</i> ferredoxin reductase 3                                             | This study |
| pETDuet-saFdR4     | pET-Duet derivative, contains <i>S. albus</i> ferredoxin reductase 4                                             | This study |
| pETDuet-saFdR1-Fd1 | pET-Duet derivative, for <i>S. albus</i> ferredoxin reductase 1 and ferredoxin 1 co-expression in <i>E. coli</i> | This study |
| pETDuet-saFdR1-Fd2 | pET-Duet derivative, for <i>S. albus</i> ferredoxin reductase 1 and ferredoxin 2 co-expression in <i>E. coli</i> | This study |
| pETDuet-saFdR1-Fd3 | pET-Duet derivative, for <i>S. albus</i> ferredoxin reductase 1 and ferredoxin 3 co-expression in <i>E. coli</i> | This study |
| pETDuet-saFdR2-Fd1 | pET-Duet derivative, for <i>S. albus</i> ferredoxin reductase 2 and ferredoxin 1 co-expression in <i>E. coli</i> | This study |
| pETDuet-saFdR2-Fd2 | pET-Duet derivative, for <i>S. albus</i> ferredoxin reductase 2 and ferredoxin 2 co-expression in <i>E. coli</i> | This study |
| pETDuet-saFdR2-Fd3 | pET-Duet derivative, for <i>S. albus</i> ferredoxin reductase 2 and ferredoxin 3 co-expression in <i>E. coli</i> | This study |
| pETDuet-saFdR3-Fd1 | pET-Duet derivative, for <i>S. albus</i>                                                                         | This study |



|                    |                                                                                                                        |            |
|--------------------|------------------------------------------------------------------------------------------------------------------------|------------|
|                    | ferrodoxin reductase 3 and ferrodoxin 1<br>co-expression in <i>E. coli</i>                                             |            |
| pETDuet-saFdR3-Fd2 | pET-Duet derivative, for <i>S. albus</i><br>ferrodoxin reductase 3 and ferrodoxin 2<br>co-expression in <i>E. coli</i> | This study |
| pETDuet-saFdR3-Fd3 | pET-Duet derivative, for <i>S. albus</i><br>ferrodoxin reductase 2 and ferrodoxin 3<br>co-expression in <i>E. coli</i> | This study |
| pETDuet-saFdR4-Fd1 | pET-Duet derivative, for <i>S. albus</i><br>ferrodoxin reductase 4 and ferrodoxin 1<br>co-expression in <i>E. coli</i> | This study |
| pETDuet-saFdR4-Fd2 | pET-Duet derivative, for <i>S. albus</i><br>ferrodoxin reductase 4 and ferrodoxin 2<br>co-expression in <i>E. coli</i> | This study |
| pETDuet-saFdR4-Fd3 | pET-Duet derivative, for <i>S. albus</i><br>ferrodoxin reductase 4 and ferrodoxin 3<br>co-expression in <i>E. coli</i> | This study |
| pWHU2482           | pIB139 derived, containing <i>cdps-p450</i><br>gene of cluster 1 ( <i>nasc</i> )                                       | This study |
| pWHU2483           | pIB139 derived, containing <i>cdps-p450</i><br>gene of cluster 2                                                       | This study |
| pWHU2484           | pET28a derivative for NascB expression<br>in <i>E. coli</i>                                                            | This study |
| pWHU2485           | pET28a derivative for cluster2-P450<br>expression in <i>E. coli</i>                                                    | This study |
| pWHU2486           | pET21a derivative, containing NascB<br>gene                                                                            | This study |
| pWHU2487           | pRSF-Duet derivative for Trx-Fd and<br>MBP-FdR co-expression in <i>E. coli</i>                                         | This study |
| pWHU2488           | pRSF-Duet derivative, containing NascB<br>gene                                                                         | This study |
| pWHU2489           | pET-Duet derived, containing NascB and<br>GDH in two MCS                                                               | This study |

---

**Supplementary Table 8** Primers used for amplifying Fd and FdR genes from *S. albus* J1074, and the restriction sites are underlined

| Name     | Sequence                                              |
|----------|-------------------------------------------------------|
| saFdR1-F | 5'-GGGAATTCC <u>CATATGGT</u> CGACGCGGATCAGACATTTCG-3' |
| saFdR1-R | 5'-CCGCTCGAGTCAGGCCCGAGGCTCTCCAG-3'                   |
| saFdR2-F | 5'-GGGAATTCC <u>CATATGG</u> CCGCAACCCCGCAGAATCC-3'    |
| saFdR1-R | 5'-CCGCTCGAGTCACGACAGGGCCTCCTCGTCGG-3'                |
| saFdR3-F | 5'-GGAATTCC <u>CATATGAC</u> CTACGCCATCACCCAGACCTGC-3' |
| saFdR3-R | 5'-CCGCTCGAGTCAGCCCGGCAGCCGCAGCC-3'                   |
| saFdR4-F | 5'-GGAATTCC <u>CATATGGT</u> GGTTCGTCGGCGCG-3'         |
| saFdR4-R | 5'-CCGCTCGAGTCAGGCCGTGGTCGACTT-3'                     |
| saFd1-F  | 5'-CGCGGATCCATGCAGGAGGAGGCCGGGCC-3'                   |
| saFd1-R  | 5'-CCCAAGCTTCTACGACGCCTCGGGTCCGTAGAC-3'               |
| saFd2-F  | 5'-CGCGGATCCATGACCTACGTCATCGCGCAGCC-3'                |
| saFd2-R  | 5'-CCCAAGCTTCTACTGGTTCTGCGGCGGCAG-3'                  |
| saFd3-F  | 5'-GGAGGATCCATGAGGATCACTGTTCGATCAGG-3'                |
| saFd3-R  | 5'-GTGAAAGCTTCGGCCGAAGCTTTCCTCCTGTGCCA-3'             |

**Supplementary Table 9** NMR data of compound NAS-1 in DMSO-*d*<sub>6</sub>

| <i>no.</i> | $\delta_{\text{H,mult}}$ ( <i>J</i> in Hz) | $\delta_{\text{C}}$ | $^1\text{H-}^{13}\text{C}$ HMBC | ROESY         |
|------------|--------------------------------------------|---------------------|---------------------------------|---------------|
| 2          | 5.66,s                                     | 81.4                | 4,9                             | 12b,5'        |
| 3          |                                            | 58.4                |                                 |               |
| 4          |                                            | 133.1               |                                 |               |
| 5          | 7.13,dd,(7.5,1.2)                          | 123.8               | 3,7,9                           | 6,7           |
| 6          | 6.61,td,(7.4,1.1)                          | 118.1               | 4,8                             | 5,7           |
| 7          | 6.96,td,(7.6,1.3)                          | 128.0               | 5,9                             | 5,8           |
| 8          | 6.63,d,(7.8)                               | 109.3               | 4,6                             | 7             |
| 9          |                                            | 149.4               |                                 |               |
| 11         | 4.05,m                                     | 58.9                | 12,13                           | 12a           |
| 12a        | 3.03,m                                     | 40.4                | 2,3,4,13                        | 11,12b        |
| 12b        | 2.65,m                                     |                     | 3,4                             | 5',12a        |
| 13         |                                            | 169.0               |                                 |               |
| 15         | 4.15,m                                     | 50.2                | 16,17                           | 14-NH,17      |
| 16         |                                            | 166.5               |                                 |               |
| 17         | 1.26,d,(6.9)                               | 15.8                | 15,16                           | 15            |
| 2'         | 7.05,d,(2.4)                               | 124.9               | 3',4',9'                        | 12'a/b        |
| 3'         |                                            | 108.9               |                                 |               |
| 4'         |                                            | 127.5               |                                 |               |
| 5'         | 7.64,s                                     | 114.9               | 3,3',7',9'                      | 2,12a/b       |
| 6'         |                                            | 134.3               |                                 |               |
| 7'         | 6.99,dd,(8.6,1.8)                          | 119.2               | 3,5',9'                         | 2,12b         |
| 8'         | 7.20,d,(8.5)                               | 111.3               | 4',6'                           | 1'-NH,7'      |
| 9'         |                                            | 134.7               |                                 |               |
| 11'        | 4.11,m                                     | 55.3                | 3',12',13'                      | 14'-NH,12'a/b |
| 12'a       | 3.23,dd,(14.4,4.6)                         | 28.7                | 2',3',4',11',13'                | 11',12'b      |
| 12'b       | 3.05,m                                     |                     | 2',3',4',11',13'                | 11',12a'      |
| 13'        |                                            | 167.0               |                                 |               |
| 15'        | 3.65,m                                     | 49.8                | 16',17'                         | 10'-NH,17'    |
| 16'        |                                            | 167.9               |                                 |               |
| 17'        | 0.54,d,(7.0)                               | 19.6                |                                 | 15'           |
| 1-NH       | 6.59,s                                     |                     | 3,4,9                           | 2             |
| 14-NH      | 8.18,s                                     |                     | 11,13,15,16,17                  | 15,17         |
| 1'-NH      | 10.84,d,(2.4)                              |                     | 2',3',4',9'                     | 2',8'         |
| 10'-NH     | 7.93,s                                     |                     | 11',15',16'                     | 15'           |
| 14'-NH     | 7.97,s                                     |                     | 11',13',15'                     | 11'           |

**Supplementary Table 10** NMR data of compound NAS-2 in DMSO-*d*<sub>6</sub>

| <i>no.</i> | $\delta_{\text{H}}$ | $\delta_{\text{C}}$ | $^1\text{H}-^{13}\text{C}$ HMBC | ROESY          |
|------------|---------------------|---------------------|---------------------------------|----------------|
| 2          | 5.61,s              | 81.8                | 3,4,9,7'                        | 1-NH,12b,8'    |
| 3          |                     | 58.4                |                                 |                |
| 4          |                     | 132.2               |                                 |                |
| 5          | 7.14,d,(7.4)        | 124.0               | 7,9                             | 6,7            |
| 6          | 6.62,m              | 117.9               | 8                               | 5,7            |
| 7          | 6.98,dd,(7.6,1.2)   | 128.2               | 9                               | 8              |
| 8          | 6.63,m              | 109.1               | 4,6                             | 7              |
| 9          |                     | 149.7               |                                 |                |
| 11         | 4.02,m              | 58.3                | 13                              | 2,12a          |
| 12a        | 3.01,m              | 41.2                | 2,3,4                           | 12b            |
| 12b        | 2.55,m              |                     | 3,4,13,7'                       | 8',12a         |
| 13         |                     | 169.0               |                                 |                |
| 15         | 4.00,s              | 59.5                | 16,18,19                        | 14-NH,17,18,19 |
| 16         |                     | 165.2               |                                 |                |
| 17         | 2.36,m              | 28.4                | 15,16,18,19                     | 15,18,19       |
| 18         | 1.01,d,(7.3)        | 18.1                | 15,17,19                        | 15,17,19       |
| 19         | 0.88,d,(6.9)        | 16.5                | 15,17,18                        | 15,17,18       |
| 2'         | 7.02,s              | 124.8               | 3,3',4',9'                      | 1'-NH,12'b     |
| 3'         |                     | 108.5               |                                 |                |
| 4'         |                     | 126.5               |                                 |                |
| 5'         | 7.50,d,(8.4)        | 119.2               | 3',9'                           | 6'             |
| 6'         | 7.00,dd,(7.5,1.5)   | 116.4               | 8'                              | 2,12b,5'       |
| 7'         |                     | 136.8               |                                 |                |
| 8'         | 7.23,d,(1.5)        | 107.9               | 3,4',6'                         | 1'-NH,2,12a/b  |
| 9'         |                     | 135.8               |                                 |                |
| 11'        | 4.07,m              | 55.3                | 3',12',13'                      | 14'-NH,12'a/b  |
| 12'a       | 3.17,dd,(14.5,4.6)  | 28.8                | 2',3',4',11'                    | 11',12'b       |
| 12'b       | 2.99,dd,(14.5,4.5)  |                     | 2',3',4',11',13'                | 11',12'a       |
| 13'        |                     | 166.8               |                                 |                |
| 15'        | 3.61,m              | 49.8                | 16',17'                         | 10'-NH,17'     |
| 16'        |                     | 167.9               |                                 |                |
| 17'        | 0.52,d,(7.0)        | 19.5                | 15',16'                         | 15'            |
| 1-NH       | 6.66,s              |                     | 3,4,9                           | 2              |
| 14-NH      | 8.00,s              |                     | 11,13,16                        | 15,17          |
| 1'-NH      | 10.81,d,(2.4)       |                     | 2',3',4',9'                     | 2',8'          |
| 10'-NH     | 7.89,s              |                     | 11',16'                         | 15'            |
| 14'-NH     | 7.94,s              |                     | 13',15'                         | 11'            |

**Supplementary Table 11** NMR data of compound NAS-3 in DMSO-*d*<sub>6</sub>

| <i>no.</i> | $\delta_{\text{H}}$ | $\delta_{\text{C}}$ | $^1\text{H}$ - $^{13}\text{C}$ HMBC | ROESY          |
|------------|---------------------|---------------------|-------------------------------------|----------------|
| 2          | 5.60,s              | 81.9                | 3,4,9,12,7'                         | 1-NH,12b,6',8' |
| 3          |                     | 58.4                |                                     |                |
| 4          |                     | 132.2               |                                     |                |
| 5          | 7.13,d,(7.4)        | 124.0               | 3,7,9                               | 7,8            |
| 6          | 6.61,dd,(7.4,1.1)   | 117.9               | 5,7,8                               | 5,7            |
| 7          | 6.98,dd,(7.6,1.3)   | 128.2               | 5,9                                 | 8              |
| 8          | 6.63,m              | 109.1               | 4,6                                 | 5,7            |
| 9          |                     | 149.7               |                                     |                |
| 11         | 4.00,m              | 58.3                | 12,13                               | 12a            |
| 12a        | 3.01,m              | 41.3                | 2,3,4                               | 11,12b         |
| 12b        | 2.54,m              |                     | 3,4,13,7'                           | 8',12a         |
| 13         |                     | 168.8               |                                     |                |
| 15         | 4.04,t,(2.2)        | 59.0                | 16,17,18                            | 14-NH,17,18a   |
| 16         |                     | 165.2               |                                     |                |
| 17         | 2.04,m              | 35.5                | 16,18                               | 15,20          |
| 18a        | 1.40,m              | 24.1                | 15,17,19,20                         | 17,19,20       |
| 18b        | 1.30,m              |                     | 15,17,19,20                         | 17,19,20       |
| 19         | 0.83,t,(7.4)        | 12.3                | 17,18                               | 17,18a/b       |
| 20         | 0.98,d,(7.2)        | 14.9                | 15,17,18                            | 15,17,18a/b    |
| 2'         | 7.02,dd,(5.6,2.0)   | 124.8               | 3',4',9'                            | 1'-NH          |
| 3'         |                     | 108.5               |                                     |                |
| 4'         |                     | 126.5               |                                     |                |
| 5'         | 7.50,d,(8.4)        | 119.2               | 3',4',7',9'                         | 6'             |
| 6'         | 7.00,dd,(5.3,1.5)   | 116.4               | 3,8'                                | 2,5'           |
| 7'         |                     | 136.8               |                                     |                |
| 8'         | 7.23,d,(1.4)        | 107.9               | 3,4',6'                             | 1'-NH,2        |
| 9'         |                     | 135.8               |                                     |                |
| 11'        | 4.07,m              | 55.3                | 3',12',13'                          | 14'-NH,12'a/b  |
| 12'a       | 3.17,dd,(14.5,4.6)  | 28.8                | 2',3',4',11',13'                    | 11',12'b       |
| 12'b       | 2.98,m              |                     | 2',3',4',11',13'                    | 11',12a'       |
| 13'        |                     | 166.8               |                                     |                |
| 15'        | 3.61,m              | 49.8                | 16',17'                             | 10'-NH,17'     |
| 16'        |                     | 167.9               |                                     |                |
| 17'        | 0.52,d,(6.9)        | 19.5                | 15'                                 | 15'            |
| 1-NH       | 6.65,s              |                     | 2,3,4,9                             | 2              |
| 14-NH      | 7.99,s              |                     | 13,16,17                            | 15,17          |
| 1'-NH      | 10.81,d,(2.4)       |                     | 2',3',4',9'                         | 2',8'          |
| 10'-NH     | 7.89,d,(2.2)        |                     | 11',15',16'                         | 15'            |
| 14'-NH     | 7.94,d,(2.1)        |                     | 13',15'                             | 11'            |

**Supplementary Table 12** NMR data of compound NAS-4 in DMSO-*d*<sub>6</sub>

| <i>no.</i> | $\delta_{\text{H}}$ | $\delta_{\text{C}}$ | $^1\text{H}-^{13}\text{C}$ HMBC | ROESY           |
|------------|---------------------|---------------------|---------------------------------|-----------------|
| 2          | 5.66,s              | 81.4                | 4,9,12,6'                       | 12b,5',7'       |
| 3          |                     | 58.3                |                                 |                 |
| 4          |                     | 133.2               |                                 |                 |
| 5          | 7.09,dd,(7.5,1.2)   | 123.8               | 3,7,9                           | 6,7             |
| 6          | 6.59,td,(7.4,1.0)   | 118.0               | 4,5,7,8,9                       | 5,7             |
| 7          | 6.95,td,(7.6,1.2)   | 127.9               | 5,9                             | 6               |
| 8          | 6.63,m              | 109.0               | 4,6,9                           | 7               |
| 9          |                     | 149.5               |                                 |                 |
| 11         | 3.99,m              | 58.2                | 12,13                           | 12a/b           |
| 12a        | 3.01,dd,(12.4,5.6)  | 40.8                | 2,3,4,11                        | 11,12b,5'       |
| 12b        | 2.62,t,(12.1)       |                     | 3,4,11,13,6'                    | 11,12a,5'       |
| 13         |                     | 168.9               |                                 |                 |
| 15         | 4.04,t,(2.2)        | 59.1                | 16,17,18                        | 14-NH,17,18a,20 |
| 16         |                     | 165.1               |                                 |                 |
| 17         | 2.04,m              | 35.6                | 15,16,18,19,20                  | 20              |
| 18a        | 1.39,m              | 24.1                | 15,17,19,20                     | 17,18a,19,20    |
| 18b        | 1.30,m              |                     | 15,17,19,20                     | 17,19,20        |
| 19         | 0.83,t,(7.4)        | 12.3                | 17,18                           | 17,18a/b        |
| 20         | 0.97,d,(7.1)        | 14.9                | 15,17,18                        | 15,17,18a/b     |
| 2'         | 7.05,d,(2.3)        | 124.9               | 3',4',9',12'                    | 1'-NH,12'a/b    |
| 3'         |                     | 109.0               |                                 |                 |
| 4'         |                     | 127.5               |                                 |                 |
| 5'         | 7.62,s              | 114.7               | 3,3',7',9'                      | 2,12b           |
| 6'         |                     | 134.5               |                                 |                 |
| 7'         | 6.98,dd,(8.6,1.8)   | 119.1               | 3,5',9'                         | 2,8'            |
| 8'         | 7.21,d,(8.5)        | 111.4               | 4',6'                           | 1'-NH,7'        |
| 9'         |                     | 134.7               |                                 |                 |
| 11'        | 4.10,m              | 55.3                | 3',12',13'                      | 10'-NH,12'a/b   |
| 12'a       | 3.22,dd,(14.4,4.6)  | 28.7                | 2',3',4',11',13'                | 11',12'b        |
| 12'b       | 3.04,dd,(14.4,4.7)  |                     | 2',3',4',11',13'                | 10'-NH,11',12a' |
| 13'        |                     | 167.0               |                                 |                 |
| 15'        | 3.66,m              | 49.8                | 16',17'                         | 14'-NH,17'      |
| 16'        |                     | 167.8               |                                 |                 |
| 17'        | 0.58,d,(6.9)        | 19.6                | 15'                             | 15'             |
| 1-NH       | 6.62,s              |                     | 4                               | 2               |
| 14-NH      | 7.98,s              |                     | 13,16,17                        | 15,17           |
| 1'-NH      | 10.84,d,(2.4)       |                     | 2',3',4',9'                     | 2',8'           |
| 10'-NH     | 7.95,d,(2.2)        |                     | 11',13',15'                     | 11',12'b        |
| 14'-NH     | 7.93,d,(2.2)        |                     | 11',15',16'                     | 15',17'         |

**Supplementary Table 13** NMR data of compound NAS-5 in DMSO-*d*<sub>6</sub>

| <i>no.</i> | $\delta_{\text{H}}$ | $\delta_{\text{C}}$ | $^1\text{H-}^{13}\text{C}$ HMBC | ROESY         |
|------------|---------------------|---------------------|---------------------------------|---------------|
| 2          | 5.63,d,(2.7)        | 84.9                | 9                               | 1-NH,6',8'    |
| 3          |                     | 59.4                |                                 |               |
| 4          |                     | 134.4               |                                 |               |
| 5          | 6.84,dd,(7.4,1.2)   | 123.7               | 3,7,9                           | 6             |
| 6          | 6.59,m              | 117.9               | 4,5,7,8                         | 5,7           |
| 7          | 6.99,m              | 127.9               | 5,9                             | 5,8           |
| 8          | 6.61,m              | 109.3               | 6                               | 7             |
| 9          |                     | 148.1               |                                 |               |
| 11         | 4.64,t,(8.6)        | 58.3                | 12,13                           | 2,12a         |
| 12a        | 3.06,dd,(13.6,7.9)  | 38.6                | 2,3,13                          | 11,12b        |
| 12b        | 2.47,m              |                     | 2,4,11,13                       | 12a           |
| 13         |                     | 170.3               |                                 |               |
| 15         | 4.07,m              | 52.8                | 16,17,18                        | 17b,18        |
| 16         |                     | 168.7               |                                 |               |
| 17a        | 1.77,m              | 37.4                | 15,16,19                        | 15,17b        |
| 17b        | 1.36,m              |                     | 15,16,18,20                     | 15,17a        |
| 18         | 1.87,m              | 24.1                | 15,17,19                        | 15,17b,20     |
| 19         | 0.86,d,(6.7)        | 22.8                | 17,20                           |               |
| 20         | 0.85,d,(6.6)        | 21.8                | 17,18,19                        |               |
| 2'         | 7.06,d,(2.3)        | 125.1               | 3',4',9'                        | 1'-NH,12'a/b  |
| 3'         |                     | 108.5               |                                 |               |
| 4'         |                     | 126.5               |                                 |               |
| 5'         | 7.54,d,(8.4)        | 119.3               | 3',9'                           |               |
| 6'         | 6.97,m              | 117.7               | 3,4',8'                         | 2,12a,,5'     |
| 7'         |                     | 129.7               |                                 |               |
| 8'         | 7.25,d,(1.7)        | 109.0               | 4',6'                           | 1'-NH,2,12a   |
| 9'         |                     | 135.8               |                                 |               |
| 11'        | 4.09,m              | 55.2                | 3',12',13'                      | 14'-NH,12'a/b |
| 12'a       | 3.20,dd,(14.5,4.5)  | 28.7                | 2',4',13'                       | 11',12'b      |
| 12'b       | 3.00,dd,(14.5,4.4)  |                     | 2',4',13'                       | 11',12a'      |
| 13'        |                     | 166.9               |                                 |               |
| 15'        | 3.63,m              | 49.8                | 16',17'                         | 10'-NH,17'    |
| 16'        |                     | 167.9               |                                 |               |
| 17'        | 0.54,d,(7.0)        | 19.5                | 15'                             | 15'           |
| 1-NH       | 6.70,s              |                     | 3,4                             | 8             |
| 14-NH      | 8.03,s              |                     | 11,15,16,17                     | 15,17b        |
| 1'-NH      | 10.84,d,(2.4)       |                     | 2',3',4',9'                     | 2',8'         |
| 10'-NH     | 7.91,d,(2.2)        |                     | 11',16'                         |               |
| 14'-NH     | 7.96,d,(2.2)        |                     | 13',15'                         | 15'           |

**Supplementary Table 14** NMR data of compound NAS-6 in DMSO-*d*<sub>6</sub>

| <i>no.</i> | $\delta_{\text{H}}$ | $\delta_{\text{C}}$ | $^1\text{H}-^{13}\text{C}$ HMBC | ROESY          |
|------------|---------------------|---------------------|---------------------------------|----------------|
| 2          | 5.64,s              | 81.5                | 4,9                             | 1-NH,12b,5',7' |
| 3          |                     | 58.4                |                                 |                |
| 4          |                     | 133.2               |                                 |                |
| 5          | 7.13,dd,(7.5,1.2)   | 123.8               | 7,9                             | 6,7            |
| 6          | 6.60,td,(7.4,1.0)   | 118.1               | 4,8                             | 5,7            |
| 7          | 6.96,td,(7.6,1.3)   | 128.0               | 5,9                             | 6,8            |
| 8          | 6.63,d,(7.4)        | 109.3               | 4,6                             | 7              |
| 9          |                     | 149.4               |                                 |                |
| 11         | 4.06,m              | 58.7                |                                 | 12a            |
| 12a        | 3.02,m              | 40.3                | 2,4,11                          | 11,12b         |
| 12b        | 2.64,m              |                     | 4,11,13                         | 5',12a         |
| 13         |                     | 169.3               |                                 |                |
| 15         | 4.08,m              | 52.7                | 16,17                           | 14-NH,17a/b,18 |
| 16         |                     | 166.5               |                                 |                |
| 17a        | 1.79,m              | 38.3                | 15,16,19                        | 15,17b,19      |
| 17b        | 1.42,m              |                     | 15,16,20                        | 17a,18,19      |
| 18         | 1.90,m              | 24.0                | 20                              | 15,17b         |
| 19         | 0.86,d,(4.4)        | 22.8                | 17,18,20                        | 15,17a/b,18    |
| 20         | 0.85,d,(4.4)        | 22.0                | 17,18,19                        | 15,17a/b,18    |
| 2'         | 7.04,d,(2.3)        | 125.0               | 3',4',9'                        | 1'-NH,12'a/b   |
| 3'         |                     | 108.9               |                                 |                |
| 4'         |                     | 127.5               |                                 |                |
| 5'         | 7.63,d,(1.8)        | 114.8               | 7',9'                           | 8'             |
| 6'         |                     | 134.3               |                                 |                |
| 7'         | 6.99,dd,(8.5,1.8)   | 119.2               | 5',9'                           | 2,12b          |
| 8'         | 7.20,d,(8.5)        | 111.3               | 4',6'                           | 1'-NH,5'       |
| 9'         |                     | 134.7               |                                 |                |
| 11'        | 4.10,m              | 55.3                |                                 | 14'-NH,12'a/b  |
| 12'a       | 3.22,dd,(14.4,4.6)  | 28.7                | 2',3'                           | 11',12'b       |
| 12'b       | 3.04,m              |                     | 3',11',13'                      | 11',12'a       |
| 13'        |                     | 167.0               |                                 |                |
| 15'        | 3.65,m              | 49.8                | 16',17'                         | 10'-NH,17'     |
| 16'        |                     | 167.9               |                                 |                |
| 17'        | 0.54,d,(6.9)        | 19.6                | 15',16'                         | 15'            |
| 1-NH       | 6.58,s              |                     | 3,4                             | 2              |
| 14-NH      | 8.04,s              |                     | 11,16                           | 15,17b         |
| 1'-NH      | 10.83,d,(2.4)       |                     | 2',4',9'                        | 2',8'          |
| 10'-NH     | 7.92,d,(2.2)        |                     | 11',16'                         | 15'            |
| 14'-NH     | 7.95,d,(2.2)        |                     | 13',15'                         | 11'            |



**Supplementary Table 15** NMR data of compound NAS-7 in DMSO-d6

| <i>no.</i> | $\delta_{\text{H}}$ | $\delta_{\text{C}}$ | $^1\text{H}-^{13}\text{C}$ HMBC | ROESY            |
|------------|---------------------|---------------------|---------------------------------|------------------|
| 2          | 5.66,s              | 81.5                | 3,4,9,11                        | 1-NH,12b,5',7'   |
| 3          |                     | 58.3                |                                 |                  |
| 4          |                     | 133.1               |                                 |                  |
| 5          | 7.12,d,(7.4)        | 123.8               | 3,7,9                           | 7                |
| 6          | 6.60,m              | 118.1               | 4,8                             | 5,7              |
| 7          | 6.96,m              | 128.0               | 5,9                             |                  |
| 8          | 6.63,m              | 109.2               | 4,6                             |                  |
| 9          |                     | 149.4               |                                 |                  |
| 11         | 4.05,m              | 58.7                | 12,13                           | 12a/b            |
| 12a        | 3.01,m              | 40.4                | 3,4                             | 11,12b           |
| 12b        | 2.69,m              |                     | 3,4,11,13                       | 5',12a           |
| 13         |                     | 168.9               |                                 |                  |
| 15         | 4.30,m              | 53.6                | 16,18                           | 14-NH            |
| 16         |                     | 165.0               |                                 |                  |
| 17         | 2.53,m              | 37.9                | 18                              | 18a/b            |
| 18a        | 2.87,m              | 48.5                | 15,17,20                        | 20               |
| 18b        | 2.76,m              |                     | 15,17,20                        | 20               |
| 20         | 2.13,m              | 22.9                | 18                              | 18b              |
| 2'         | 7.05,d,(2.3)        | 124.9               | 3',4',9'                        | 1'-NH,11',12'a/b |
| 3'         |                     | 108.9               |                                 |                  |
| 4'         |                     | 127.5               |                                 |                  |
| 5'         | 7.64,s              | 114.9               | 3,3',7',9'                      | 2                |
| 6'         |                     | 134.3               |                                 |                  |
| 7'         | 6.97,m              | 119.2               | 3,5'                            | 2,12a/b          |
| 8'         | 7.20,dd,(8.5,2.2)   | 111.3               | 4',6'                           | 1'-NH,7'         |
| 9'         |                     | 134.7               |                                 |                  |
| 11'        | 4.10,m              | 55.4                | 3',12',13'                      | 14'-NH,12'a/b    |
| 12'a       | 3.22,dd,(14.5,4.6)  | 28.8                | 2',3',4',11',13'                | 11',12'b         |
| 12'b       | 3.05,dd,(14.4,4.6)  |                     | 2',3',4',11',13'                | 11',12'a         |
| 13'        |                     | 166.9               |                                 |                  |
| 15'        | 3.64,m              | 49.8                | 16',17'                         | 10'-NH,17'       |
| 16'        |                     | 167.8               |                                 |                  |
| 17'        | 0.53,d,(6.9)        | 19.6                | 15',16'                         | 15',16'          |
| 1-NH       | 6.62,m              |                     | 2,3,4,9                         | 2                |
| 14-NH      | 8.24,s              |                     | 11,13,15,16                     | 15               |
| 1'-NH      | 10.84,d,(2.3)       |                     | 2',3',4',9'                     | 2',8'            |
| 10'-NH     | 7.93,d,(2.2)        |                     | 11',15',16'                     | 15'              |
| 14'-NH     | 7.97,m              |                     | 11',13',15'                     | 11'              |

**Supplementary Table 16** NMR data of compound NAS-8 in DMSO-d6

| <i>no.</i> | $\delta_{\text{H}}$ | $\delta_{\text{C}}$ | $^1\text{H}-^{13}\text{C}$ HMBC | ROESY            |
|------------|---------------------|---------------------|---------------------------------|------------------|
| 2          | 5.66,s              | 81.5                | 4,9,11,                         | 12b,5',7'        |
| 3          |                     | 58.3                |                                 |                  |
| 4          |                     | 133.1               |                                 |                  |
| 5          | 7.12,d,(7.3)        | 123.8               | 7,9                             | 6,7              |
| 6          | 6.62,m              | 118.1               | 4                               | 7                |
| 7          | 6.96,m              | 128.0               | 9                               |                  |
| 8          | 6.63,m              | 109.1               | 6                               |                  |
| 9          |                     | 149.4               |                                 |                  |
| 11         | 4.04,m              | 58.7                |                                 | 12a/b            |
| 12a        | 2.99,m              | 40.2                |                                 | 11,12b           |
| 12b        | 2.71,t,(12.1)       |                     | 11,13                           | 5',12a           |
| 13         |                     | 168.9               |                                 |                  |
| 15         | 4.32,m              | 52.9                | 16,18                           | 14-NH            |
| 16         |                     | 164.6               |                                 |                  |
| 17         | 2.54,m              | 40.4                |                                 | 18a/b            |
| 18a        | 3.25,m              | 49.7                |                                 | 20               |
| 18b        | 3.18,m              |                     |                                 | 20               |
| 20         | 2.19,m              | 22.7                |                                 | 18b              |
| 2'         | 7.04,d,(2.4)        | 124.9               | 3',4'                           | 1'-NH,11',12'a/b |
| 3'         |                     | 108.9               |                                 |                  |
| 4'         |                     | 127.5               |                                 |                  |
| 5'         | 7.64,s              | 114.9               | 3,7',9'                         | 2                |
| 6'         |                     | 134.2               |                                 |                  |
| 7'         | 6.97,m              | 119.2               | 3                               | 2,12a/b          |
| 8'         | 7.20,d,(8.6)        | 111.3               | 4',6'                           | 1'-NH,7'         |
| 9'         |                     | 134.7               |                                 |                  |
| 11'        | 4.11,m              | 55.4                |                                 | 14'-NH,12'a/b    |
| 12'a       | 3.21,dd,(14.6,5.0)  | 28.8                | 2',3',4',11'                    | 11',12'b         |
| 12'b       | 3.05,dd,(14.4,4.6)  |                     | 2',3',4',11',13'                | 11',12'a         |
| 13'        |                     | 166.9               |                                 |                  |
| 15'        | 3.64,m              | 49.8                | 16',17'                         | 10'-NH,17'       |
| 16'        |                     | 167.7               |                                 |                  |
| 17'        | 0.53,d,(6.9)        | 19.5                | 16'                             | 15',16'          |
| 1-NH       | 6.62,m              |                     | 3,4                             | 2                |
| 14-NH      | 8.22,s              |                     | 11,15,16                        | 15               |
| 1'-NH      | 10.83,d,(2.4)       |                     | 3',4'                           | 2',8'            |
| 10'-NH     | 7.92,d,(2.3)        |                     | 11',13'                         | 15'              |
| 14'-NH     | 7.97,d,(2.2)        |                     | 15',16'                         | 11',12'b         |

**Supplementary Table 17** NMR data of compound NAS-9 in DMSO-d6

| <i>no.</i> | $\delta_{\text{H}}$ | $\delta_{\text{C}}$ | $^1\text{H}-^{13}\text{C}$ HMBC | ROESY                |
|------------|---------------------|---------------------|---------------------------------|----------------------|
| 2          | 5.59,s              | 81.4                | 4,9,11,6'                       | 1-NH,12b,5',7'       |
| 3          |                     | 58.4                |                                 |                      |
| 4          |                     | 132.9               |                                 |                      |
| 5          | 7.05,dd,(7.5,1.4)   | 123.9               | 3,7,9                           | 6,7                  |
| 6          | 6.56,dd,(7.4,1.1)   | 118.0               | 4,8                             | 7                    |
| 7          | 6.94,td,(7.6,1.3)   | 127.9               | 5,9                             | 8                    |
| 8          | 6.58,m              | 108.8               | 4,6                             | 7                    |
| 9          |                     | 149.5               |                                 |                      |
| 11         | 3.90,m              | 58.3                | 12,13                           | 12a                  |
| 12a        | 2.79,dd,(12.1,5.5)  | 40.8                | 2,4,11                          | 11,12b               |
| 12b        | 2.00,t,(12.0)       |                     | 3,4,13                          | 5',12a               |
| 13         |                     | 167.8               |                                 |                      |
| 15         | 4.43,m              | 55.6                | 16,17,18                        | 14-NH,17a/b          |
| 16         |                     | 164.8               |                                 |                      |
| 17a        | 3.12,dd,(14.0,4.2)  | 36.2                | 15,16,18,19,23                  | 15,19,23             |
| 17b        | 3.03,m              |                     | 15,16,18,19,23                  | 15,17a               |
| 18         |                     | 136.7               |                                 |                      |
| 19         | 7.21,m              | 129.8               | 17,21,23                        | 20,22                |
| 20         | 7.12,m              | 128.0               | 18,22                           |                      |
| 21         | 7.09,m              | 126.3               | 19,23                           |                      |
| 22         | 7.11,m              | 128.0               | 18,20                           |                      |
| 23         | 7.20,m              | 129.8               | 17,19,21                        |                      |
| 2'         | 7.07,d,(2.3)        | 124.9               | 3',4',9'                        | 12'a/b               |
| 3'         |                     | 109.0               |                                 |                      |
| 4'         |                     | 127.3               |                                 |                      |
| 5'         | 7.45,d,(1.8)        | 114.8               | 3,3',7',9'                      | 2                    |
| 6'         |                     | 134.3               |                                 |                      |
| 7'         | 6.86,dd,(8.6,1.8)   | 119.2               | 3,5',9'                         | 2,12a/b,8'           |
| 8'         | 7.20,m              | 111.4               | 6'                              | 1'-NH,7'             |
| 9'         |                     | 134.6               |                                 |                      |
| 11'        | 4.10,m              | 55.2                | 3',12',13'                      | 10'-NH,14'-NH,12'a/b |
| 12'a       | 3.22,dd,(14.5,4.9)  | 28.7                | 2',3',4',11',13'                | 11',12'b             |
| 12'b       | 3.06,m              |                     | 2',3',4',11',13'                | 11',12'a             |
| 13'        |                     | 167.0               |                                 |                      |
| 15'        | 3.68,m              | 49.9                | 16',17'                         | 14'-NH,17'           |
| 16'        |                     | 168.0               |                                 |                      |
| 17'        | 0.62,d,(6.9)        | 19.6                | 15',16'                         | 15'                  |
| 1-NH       | 6.64,s              |                     | 4,9                             | 2                    |
| 14-NH      | 8.10,s              |                     | 11,15,16                        | 15                   |
| 1'-NH      | 10.85,d,(2.4)       |                     | 2',3',4',9'                     | 2'                   |
| 10'-NH     | 7.93,m              |                     | 11',15'                         | 15'                  |
| 14'-NH     | 7.93,m              |                     | 11',15'                         | 11'                  |

**Supplementary Table 18** NMR data of compound NAS-10 in DMSO-d6

| <i>no.</i> | $\delta_{\text{H}}$ | $\delta_{\text{C}}$ | $^1\text{H}-^{13}\text{C}$ HMBC | ROESY          |
|------------|---------------------|---------------------|---------------------------------|----------------|
| 2          | 5.64,d,(2.3)        | 81.5                | 4,9,12                          | 1-NH,12b,5',7' |
| 3          |                     | 58.3                |                                 |                |
| 4          |                     | 133.0               |                                 |                |
| 5          | 7.13,dd,(7.4,2.3)   | 123.7               | 3,7,9                           | 6,12a          |
| 6          | 6.59,m              | 118.0               | 8                               | 5,7            |
| 7          | 6.97,m              | 128.0               | 5,9                             | 5              |
| 8          | 6.63,dd,(8.0,2.4)   | 109.3               | 4,6                             |                |
| 9          |                     | 149.5               |                                 |                |
| 11         | 4.05,m              | 58.9                | 12,13                           | 12a            |
| 12a        | 3.03,m              | 40.5                | 2,4                             | 11,12b         |
| 12b        | 2.65,td,(12.0,2.4)  |                     | 4,13,                           | 12a            |
| 13         |                     | 169.0               |                                 |                |
| 15         | 4.15,m              | 50.2                | 16,17                           | 14-NH          |
| 16         |                     | 166.5               |                                 |                |
| 17         | 1.25,m              | 15.7                | 15,16                           | 15             |
| 2'         | 7.17,s              | 124.8               | 3',4',9'                        | 1'-NH,12'a/b   |
| 3'         |                     | 109.6               |                                 |                |
| 4'         |                     | 127.1               |                                 |                |
| 5'         | 7.63,d,(2.4)        | 114.6               | 3,3',7',9'                      | 2,12b          |
| 6'         |                     | 134.2               |                                 |                |
| 7'         | 7.02,dt,(8.7,2.2)   | 119.3               | 3,5',9'                         | 2,8'           |
| 8'         | 7.22,dd,(8.6,2.4)   | 111.4               | 4',6'                           | 1'-NH,7'       |
| 9'         |                     | 134.8               |                                 |                |
| 11'        | 4.30,m              | 55.1                | 3',12',13'                      | 10'-NH,12'a/b  |
| 12'a       | 3.23,m              | 25.5                | 2',3',4',11',13'                | 11',12'b       |
| 12'b       | 3.07,m              |                     | 2',3',4',11',13'                | 11',12'a'      |
| 13'        |                     | 165.6               |                                 |                |
| 15'        | 4.09,m              | 58.5                | 16',17'                         | 17'a/b         |
| 16'        |                     | 169.1               |                                 |                |
| 17'a       | 2.00,m              | 27.7                | 19'                             | 15'            |
| 17'b       | 1.45,m              |                     | 16',18'                         | 17'a           |
| 18'a       | 1.71,m              | 21.9                |                                 | 17'a/b,19'a/b  |
| 18'b       | 1.64,m              |                     | 11'                             | 17'a/b,19'a/b  |
| 19'a       | 3.39,m              | 44.6                | 15',17',18'                     | 19'b           |
| 19'b       | 3.28,m              |                     | 15',17',18'                     |                |
| 1-NH       | 6.61,s              |                     | 4,9                             | 2              |
| 14-NH      | 8.18,s              |                     | 11,13,15,16,17                  | 15,17          |
| 1'-NH      | 10.81,d,(2.9)       |                     | 2',3',4',9'                     | 2'             |
| 10'-NH     | 7.70,s              |                     | 11',12',13',15',16'             | 11',12'a/b     |

**Supplementary Table 19** NMR data of compound NAS-11 in DMSO-d6

| <i>no.</i> | $\delta_{\text{H}}$ | $\delta_{\text{C}}$ | $^1\text{H}-^{13}\text{C}$ HMBC | ROESY          |
|------------|---------------------|---------------------|---------------------------------|----------------|
| 2          | 5.70,s              | 81.4                | 3,4,9,12,6'                     | 1-NH,12b,5',7' |
| 3          |                     | 58.3                |                                 |                |
| 4          |                     | 133.0               |                                 |                |
| 5          | 7.09,d,(7.4)        | 123.7               | 3,7,9                           | 6,7,12a        |
| 6          | 6.58,t,(7.4)        | 118.0               | 4,8                             | 5,7            |
| 7          | 6.96,t,(7.5)        | 128.0               | 5,9                             | 5,6,8          |
| 8          | 6.63,d,(7.9)        | 109.1               | 4,6                             | 7              |
| 9          |                     | 149.5               |                                 |                |
| 11         | 4.02,m              | 58.2                | 12,13                           | 12a            |
| 12a        | 3.04,dd,(12.4,5.8)  | 41.0                | 2,4,11                          | 12b,15         |
| 12b        | 2.60,t,(12.0)       |                     | 4,11,13,6'                      | 12a            |
| 13         |                     | 169.1               |                                 |                |
| 15         | 4.00,m              | 59.5                | 16,17,18,19                     | 14-NH,17,18,19 |
| 16         |                     | 165.1               |                                 |                |
| 17         | 2.36,m              | 28.5                | 15,16,18,19                     | 15,18,19       |
| 18         | 1.00,d,(7.2)        | 18.1                | 15,17,19                        | 15,17,19       |
| 19         | 0.86,d,(6.8)        | 16.5                | 15,17,18                        | 17,18          |
| 2'         | 7.18,d,(2.3)        | 124.9               | 3',4',9'                        | 1'-NH,12'a/b   |
| 3'         |                     | 109.6               |                                 |                |
| 4'         |                     | 127.1               |                                 |                |
| 5'         | 7.62,d,(1.8)        | 114.5               | 3,3',7',9'                      | 2,12a/b        |
| 6'         |                     | 134.4               |                                 |                |
| 7'         | 7.03,dd,(8.5,1.9)   | 119.2               | 3,5',9'                         | 2,12a/b,8'     |
| 8'         | 7.24,d,(8.5)        | 111.5               | 4',6'                           | 1'-NH,7'       |
| 9'         |                     | 134.8               |                                 |                |
| 11'        | 4.30,t,(5.4)        | 55.1                | 3',12',13'                      | 10'-NH,12'a/b  |
| 12'a       | 3.23,dd,(14.9,4.9)  | 25.5                | 2',3',4',11',13'                | 12'b           |
| 12'b       | 3.08,dd,(14.9,5.8)  |                     | 2',3',4',11',13'                | 11',12a'       |
| 13'        |                     | 165.6               |                                 |                |
| 15'        | 4.09,dd,(9.8,6.8)   | 58.5                | 16',17'                         | 17'a/b,18'a/b  |
| 16'        |                     | 169.1               |                                 |                |
| 17'a       | 2.00,m              | 27.7                | 19'                             | 18'a/b         |
| 17'b       | 1.44,m              |                     | 15',18'                         | 17'a,18'a/b    |
| 18'a       | 1.71,m              | 21.9                |                                 | 17'a/b,18'b    |
| 18'b       | 1.61,m              |                     |                                 | 17'a/b,18'a    |
| 19'a       | 3.40,m              | 44.6                | 15',17',18'                     | 18'a/b         |
| 19'b       | 3.28,m              |                     | 17',18'                         | 19'a           |
| 1-NH       | 6.66,s              |                     | 2,3,4,9                         | 2              |
| 14-NH      | 7.99,s              |                     | 11,13,15,16,17                  | 15,17,18       |
| 1'-NH      | 10.83,d,(2.5)       |                     | 2',3',4',9'                     | 2'             |
| 10'-NH     | 7.71,s              |                     | 11',12',13',15',16'             | 11',12'a/b     |

**Supplementary Table 20** NMR data of compound NAS-12 in DMSO-d6

| <i>no.</i> | $\delta_{\text{H}}$ | $\delta_{\text{C}}$ | $^1\text{H}-^{13}\text{C}$ HMBC | ROESY                  |
|------------|---------------------|---------------------|---------------------------------|------------------------|
| 2          | 5.69,s              | 81.4                | 4,9,11,12,6'                    | 1-NH,12b,5',7'         |
| 3          |                     | 58.3                |                                 |                        |
| 4          |                     | 133.0               |                                 |                        |
| 5          | 7.09,d,(7.4)        | 123.7               | 3,7,9                           | 6                      |
| 6          | 6.58,t,(7.4)        | 117.9               | 4,5,7,8                         | 5,7                    |
| 7          | 6.96,m              | 128.0               | 5,9                             | 6,8                    |
| 8          | 6.62,d,(7.8)        | 109.1               | 4,6                             | 7                      |
| 9          |                     | 149.5               |                                 |                        |
| 11         | 4.00,m              | 58.2                | 12,13                           | 12a                    |
| 12a        | 3.04,m              | 41.0                | 2,3,4                           | 11,12b,5'              |
| 12b        | 2.59,t,(12.0)       |                     | 3,4,6'                          | 11,12a,5'              |
| 13         |                     | 168.8               |                                 |                        |
| 15         | 4.04,m              | 59.1                | 16,17,18,20                     | 14-NH,17a              |
| 16         |                     | 165.1               |                                 |                        |
| 17         | 2.05,m              | 35.6                | 16,18,20                        | 15,18a/b               |
| 18a        | 1.39,m              | 24.1                | 15,17,19,20                     | 17                     |
| 18b        | 1.31,m              |                     | 15,17,19,20                     | 17                     |
| 19         | 0.82,t,(7.4)        | 12.2                | 17,18                           | 17,18a/b,20            |
| 20         | 0.97,d,(7.0)        | 14.9                | 15,17,18                        | 15,17,19               |
| 2'         | 7.18,s              | 124.9               | 3',4',9'                        | 1'-NH,11',12'a/b       |
| 3'         |                     | 109.5               |                                 |                        |
| 4'         |                     | 127.1               |                                 |                        |
| 5'         | 7.61,d,(1.9)        | 114.5               | 3,3',7',9'                      | 2,12a/b                |
| 6'         |                     | 134.5               |                                 |                        |
| 7'         | 7.03,dd,(8.5,1.8)   | 119.2               | 3,5',9'                         | 2,12a/b,8'             |
| 8'         | 7.24,dd,(8.6,1.6)   | 111.5               | 4'.6'                           | 1'-NH,7'               |
| 9'         |                     | 134.8               |                                 |                        |
| 11'        | 4.30,t,(5.5)        | 55.1                | 3',12',13',16'                  | 10'-NH,12'a/b          |
| 12'a       | 3.23,dd,(15.0,4.9)  | 25.5                | 2',3',4',11',13'                | 10'-NH,11',12'b        |
| 12'b       | 3.08,dd,(15.0,5.8)  |                     | 2',3',4',11',13'                | 10'-NH,11',12'a        |
| 13'        |                     | 165.6               |                                 |                        |
| 15'        | 4.09,m              | 58.4                | 16',17'                         | 17'a/b,18'a/b          |
| 16'        |                     | 169.1               |                                 |                        |
| 17'a       | 2.00,m              | 27.7                | 18',19'                         | 15',18'a/b             |
| 17'b       | 1.44,m              |                     | 15',16',18'                     | 17'b,18'a/b            |
| 18'a       | 1.71,m              | 21.9                | 15',19'                         | 15',17'a/b,18'b,19'a/b |
| 18'b       | 1.62,m              |                     | 17'                             | 15',17'a/b,18'a,19'a/b |
| 19'a       | 3.40,m              | 44.6                | 15',17',18'                     | 17'a/b,18'a/b,19'b     |
| 19'b       | 3.28,m              |                     | 17',18'                         | 17'a/b,18'a/b,19'a     |
| 1-NH       | 6.65,s              |                     | 3,4,9                           | 2                      |
| 14-NH      | 7.99,s              |                     | 11,13,16,17                     | 15,17                  |
| 1'-NH      | 10.82,d,(2.0)       |                     | 2',3',4',9'                     |                        |
| 10'-NH     | 7.71,s              |                     | 11',12',13',15',16'             | 2',11',12'a/b          |

**Supplementary Table 21** NMR data of compound NAS-13 in DMSO-d6

| <i>no.</i> | $\delta_{\text{H}}$ | $\delta_{\text{C}}$ | $^1\text{H}-^{13}\text{C}$ HMBC | ROESY            |
|------------|---------------------|---------------------|---------------------------------|------------------|
| 2          | 5.65,s              | 81.6                | 4,9,6'                          | 12b,5',7'        |
| 3          |                     | 58.3                |                                 |                  |
| 4          |                     | 133.0               |                                 |                  |
| 5          | 7.13,dd,(7.4,1.2)   | 123.7               | 3,7,9                           | 6,7              |
| 6          | 6.60,dd,(7.4,1.1)   | 118.0               | 4,8                             | 5,7              |
| 7          | 6.97,m              | 128.0               | 5,9                             | 6                |
| 8          | 6.64,m              | 109.3               | 4,6                             | 7                |
| 9          |                     | 149.4               |                                 |                  |
| 11         | 4.08,m              | 58.7                | 12,13                           | 12a              |
| 12a        | 3.04,m              | 40.4                | 4                               | 11,12b           |
| 12b        | 2.65,t,(12.6)       |                     | 4,13,6'                         | 12a,5'           |
| 13         |                     | 169.3               |                                 |                  |
| 15         | 4.10,m              | 52.7                | 16,17,18                        | 14-NH,17a        |
| 16         |                     | 166.4               |                                 |                  |
| 17a        | 1.80,m              | 38.2                | 15,16                           |                  |
| 17b        | 1.42,m              |                     | 16                              |                  |
| 18         | 1.91,m              | 23.9                | 17                              | 15,17b           |
| 19         | 0.86,d,(6.6)        | 22.8                | 17,18                           |                  |
| 20         | 0.86,d,(6.6)        | 22.8                | 17,18                           |                  |
| 2'         | 7.18,d(2.4)         | 124.9               | 3',4',9'                        | 1'-NH,11',12'a/b |
| 3'         |                     | 109.5               |                                 |                  |
| 4'         |                     | 127.1               |                                 |                  |
| 5'         | 7.63,d,(1.8)        | 114.6               | 3,3',7',9'                      | 2,12a/b          |
| 6'         |                     | 134.2               |                                 |                  |
| 7'         | 7.03,dd,(8.5,1.8)   | 119.2               | 3,5',9'                         | 2,12a/b          |
| 8'         | 7.23,d,(8.5)        | 111.4               | 4',6'                           | 1'-NH,7'         |
| 9'         |                     | 134.8               |                                 |                  |
| 11'        | 4.30,t(5.4)         | 55.1                | 3',12',13'                      | 10'-NH,12'a/b    |
| 12'a       | 3.23,dd,(14.9,4.8)  | 25.5                | 2',3',4',13'                    | 11',12'b         |
| 12'b       | 3.08,m              |                     | 2',3',4',13'                    | 11',12'a         |
| 13'        |                     | 165.6               |                                 |                  |
| 15'        | 4.09,m              | 58.5                | 16'                             | 17'a/b           |
| 16'        |                     | 169.1               |                                 |                  |
| 17'a       | 2.00,m              | 27.7                | 19'                             | 15',17'a         |
| 17'b       | 1.46,m              |                     | 16',19'                         |                  |
| 18'a       | 1.71,m              | 21.9                |                                 |                  |
| 18'b       | 1.62,m              |                     |                                 |                  |
| 19'a       | 3.40,m              | 44.6                | 18'                             | 17'a,18'a/b      |
| 19'b       | 3.29,m              |                     | 15',17'                         | 17'a,18'a/b      |
| 1-NH       | 6.62,s              |                     | 3,4,9                           |                  |
| 14-NH      | 8.06,s              |                     | 11,13,15,16,17                  | 15,17a           |
| 1'-NH      | 10.82,d,(2.4)       |                     | 2',3',4',9'                     |                  |
| 10'-NH     | 7.71,s              |                     | 11',12',13',15',16'             | 11',12'a/b       |

**Supplementary Table 22** NMR data of compound NAS-14 in DMSO-d6

| <i>no.</i> | $\delta_{\text{H}}$ | $\delta_{\text{C}}$ | $^1\text{H}-^{13}\text{C}$ HMBC | ROESY         |
|------------|---------------------|---------------------|---------------------------------|---------------|
| 2          | 5.69,s              | 81.6                | 4,9,12                          | 12b,5',7'     |
| 3          |                     | 58.3                |                                 |               |
| 4          |                     | 133.0               |                                 |               |
| 5          | 7.12,d,(7.4)        | 123.7               | 3,7,9                           | 6,12a         |
| 6          | 6.60,t,(7.4)        | 118.0               | 4,7,8                           | 5,7           |
| 7          | 6.97,t, (7.6)       | 128.1               | 5,9                             | 5             |
| 8          | 6.64,d,(3.4)        | 109.3               | 4,6                             | 7             |
| 9          |                     | 149.4               |                                 |               |
| 11         | 4.06,m              | 58.7                | 12,13                           | 12a           |
| 12a        | 3.04,m              | 40.6                | 2,3,4                           | 11,12b        |
| 12b        | 2.66,m              |                     | 4,13                            | 12a,5'        |
| 13         |                     | 169.0               |                                 |               |
| 15         | 4.30,m              | 53.5                | 16,18                           | 14-NH         |
| 16         |                     | 165.0               |                                 |               |
| 17         | 2.53,m              | 37.9                | 18                              |               |
| 18a        | 2.87,m              | 48.5                |                                 |               |
| 18b        | 2.75,m              |                     |                                 |               |
| 20         | 2.14,m              | 22.9                |                                 |               |
| 2'         | 7.17,d,(2.3)        | 124.9               | 3',4',9'                        | 1'-NH,12'a/b  |
| 3'         |                     | 109.5               |                                 |               |
| 4'         |                     | 127.1               |                                 |               |
| 5'         | 7.63,d,(1.8)        | 114.6               | 3,3',7',9'                      | 2,12b         |
| 6'         |                     | 134.2               |                                 |               |
| 7'         | 7.03,m              | 119.2               | 3,5',9'                         | 2,8'          |
| 8'         | 7.23,d,(8.5)        | 111.5               | 4',6'                           | 1'-NH,7'      |
| 9'         |                     | 134.8               |                                 |               |
| 11'        | 4.30,m              | 55.1                | 3',12'                          | 10'-NH,12'a/b |
| 12'a       | 3.23,dd,(14.9,4.8)  | 25.5                | 2',3',4',11',13'                | 11',12'b      |
| 12'b       | 3.08,m              |                     | 2',3',4',11',13'                | 11',12a'      |
| 13'        |                     | 165.6               |                                 |               |
| 15'        | 4.09,m              | 58.5                | 16',17'                         | 17'a/b        |
| 16'        |                     | 169.1               |                                 |               |
| 17'a       | 2.00,m              | 27.7                | 19'                             |               |
| 17'b       | 1.45,m              |                     | 15',16',18'                     |               |
| 18'a       | 1.71,m              | 21.9                | 17',19'                         |               |
| 18'b       | 1.63,m              |                     |                                 |               |
| 19'a       | 3.40,m              | 44.6                | 17',18'                         |               |
| 19'b       | 3.29,m              |                     | 17',18'                         |               |
| 1-NH       | 6.63,s              |                     | 4,9                             |               |
| 14-NH      | 8.24,s              |                     | 11,13,15,16                     | 15            |
| 1'-NH      | 10.84,d,(2.4)       |                     | 2',3',4',9'                     | 2'            |
| 10'-NH     | 7.71,s              |                     | 11',12',13',15',16'             | 12'a/b        |



**Supplementary Table 23** NMR data of compound NAS-15 in DMSO-d6

| <i>no.</i> | $\delta_{\text{H}}$ | $\delta_{\text{C}}$ | $^1\text{H}-^{13}\text{C}$ HMBC | ROESY          |
|------------|---------------------|---------------------|---------------------------------|----------------|
| 2          | 5.66,s              | 81.6                | 4,9,11                          | 1-NH,12b,5',7' |
| 3          |                     | 58.3                |                                 |                |
| 4          |                     | 133.0               |                                 |                |
| 5          | 7.11,d,(7.4)        | 123.7               | 6,9                             | 6,12a          |
| 6          | 6.59,t,(7.4)        | 118.0               | 4,8                             | 5,7            |
| 7          | 6.97,t,(7.6)        | 128.1               | 5,9                             | 5              |
| 8          | 6.63,d,m            | 109.3               | 4,6,9                           |                |
| 9          |                     | 149.5               |                                 |                |
| 11         | 4.06,m              | 58.7                | 12,13                           | 12a            |
| 12a        | 3.02,m              | 40.6                | 2,3,4                           | 11,12b         |
| 12b        | 2.64,t,(12.0)       |                     | 4,13                            | 12a            |
| 13         |                     | 169.1               |                                 |                |
| 15         | 4.21,m              | 53.4                | 16,18                           | 14-NH          |
| 16         |                     | 165.5               |                                 |                |
| 17         | 2.56,m              | 28.8                | 18                              | 15             |
| 18         | 2.87,m              | 38.1                |                                 |                |
| 19         | 2.03,m              | 14.5                |                                 |                |
| 2'         | 7.17,s              | 124.9               | 3',4',9'                        | 1'-NH,12'a/b   |
| 3'         |                     | 109.5               |                                 |                |
| 4'         |                     | 127.1               |                                 |                |
| 5'         | 7.61,s              | 114.6               | 3,3',7',9'                      | 2,12b          |
| 6'         |                     | 134.2               |                                 |                |
| 7'         | 7.03,d,(8.5)        | 119.2               | 3,5',9'                         | 2,8'           |
| 8'         | 7.23,d,(8.6)        | 111.5               | 4',6'                           | 1'-NH,7'       |
| 9'         |                     | 134.8               |                                 |                |
| 11'        | 4.30,m              | 55.1                | 3',12'                          | 10'-NH,12'a/b  |
| 12'a       | 3.23,m              | 25.5                | 2',3',4',11',13'                | 11',12'b       |
| 12'b       | 3.07,m              |                     | 2',3',4',11',13'                | 11',12'a'      |
| 13'        |                     | 165.6               |                                 |                |
| 15'        | 4.09,m              | 58.5                | 16',17'                         | 17'a/b         |
| 16'        |                     | 169.1               |                                 |                |
| 17'a       | 1.99,m              | 27.7                | 19'                             | 15'            |
| 17'b       | 1.46,m              |                     | 15',16',18'                     | 17'a           |
| 18'a       | 1.71,m              | 21.9                | 17',19'                         | 17'a/b,19'a/b  |
| 18'b       | 1.63,m              |                     |                                 | 17'a/b,19'a/b  |
| 19'a       | 3.39,m              | 44.6                | 17',18'                         | 19'b           |
| 19'b       | 3.29,m              |                     | 17',18'                         |                |
| 1-NH       | 6.63,m              |                     | 4,9                             | 2              |
| 14-NH      | 8.20,s              |                     | 11,13,15,16                     | 15,17          |
| 1'-NH      | 10.86,d,(2.4)       |                     | 2',3',4',9'                     | 2'             |
| 10'-NH     | 7.70,s              |                     | 11',12',13',15',16'             | 11',12'a/b     |

**Supplementary Table 24** NMR data of compound NAS-16 in DMSO-d6

| <i>no.</i> | $\delta_{\text{H}}$ | $\delta_{\text{C}}$ | $^1\text{H-}^{13}\text{C}$ HMBC | ROESY                  |
|------------|---------------------|---------------------|---------------------------------|------------------------|
| 2          | 5.60,s              | 81.5                | 3,4,9                           | 1-NH,12b,5',7'         |
| 3          |                     | 58.4                |                                 |                        |
| 4          |                     | 132.7               |                                 |                        |
| 5          | 7.03,dd,(7.4,1.3)   | 123.7               | 3,7,9                           | 6                      |
| 6          | 6.56,td,(7.4,1.1)   | 117.9               | 4,8                             | 5,7                    |
| 7          | 6.95,td,(7.6,1.3)   | 128.0               | 5,9                             | 6,8                    |
| 8          | 6.59,dd,(7.9,1.0)   | 108.9               | 4,6                             | 1-NH,7                 |
| 9          |                     | 149.6               |                                 |                        |
| 11         | 3.90,m              | 58.3                | 12,13                           | 12a                    |
| 12a        | 2.81,dd,(12.0,5.4)  | 41.0                | 2,3                             | 11,12b                 |
| 12b        | 1.97,t,(11.9)       |                     | 4,11                            | 12a,5'                 |
| 13         |                     | 167.6               |                                 |                        |
| 15         | 4.44,m              | 55.6                | 13,18                           | 14-NH,17a/b,23         |
| 16         |                     | 164.7               |                                 |                        |
| 17a        | 3.14,dd,(14.0,4.0)  | 36.2                | 18,23                           | 15,17b                 |
| 17b        | 3.01,dd,(14.0,5.5)  |                     | 15,16,18,23                     | 15,17a                 |
| 18         |                     | 136.7               |                                 |                        |
| 19         | 7.11,m              | 127.9               |                                 | 23                     |
| 20         | 7.11,m              | 127.9               |                                 | 22                     |
| 21         | 7.09,m              | 126.3               | 23                              |                        |
| 22         | 7.20                | 129.9               |                                 | 20                     |
| 23         | 7.21                | 129.9               |                                 | 19                     |
| 2'         | 7.19,d,(2.3)        | 124.7               | 3',4',9'                        | 1'-NH                  |
| 3'         |                     | 109.6               |                                 |                        |
| 4'         |                     | 127.0               |                                 |                        |
| 5'         | 7.45,d,(1.8)        | 114.6               | 3,3',7',9'                      | 2,12a/b                |
| 6'         |                     | 134.2               |                                 |                        |
| 7'         | 6.88,dd,(8.5,1.8)   | 119.2               | 3,5',9'                         | 2,12b,8'               |
| 8'         | 7.23,d,(8.4)        | 111.4               | 4',6'                           | 1'-NH,7'               |
| 9'         |                     | 134.7               |                                 |                        |
| 11'        | 4.32,t,(5.5)        | 55.0                | 3',12',13'                      | 10'-NH,12'a/b          |
| 12'a       | 3.24,m              | 25.4                | 2',3',4',11',13'                | 11',12'b               |
| 12'b       | 3.07,dd,(14.9,6.0)  |                     | 2',3',4',11',13'                | 11',12'a               |
| 13'        |                     | 165.6               |                                 |                        |
| 15'        | 4.11,m              | 58.5                | 16',17'                         | 17'a/b,18'a            |
| 16'        |                     | 169.2               |                                 |                        |
| 17'a       | 2.02,m              | 27.6                |                                 | 15',17'b,18'a          |
| 17'b       | 1.50,m              |                     | 15'                             | 17'a,18'a/b,19'a       |
| 18'a       | 1.72,m              | 21.9                |                                 | 15',17'a/b,18'b,19'a/b |
| 18'b       | 1.63,m              |                     |                                 | 15',17'a/b,18'a,19'a/b |
| 19'a       | 3.39,m              | 44.6                | 18'                             | 19'b                   |
| 19'b       | 3.30,m              |                     |                                 | 19'a                   |
| 1-NH       | 6.67,s              |                     | 3,4,9                           | 2,8                    |
| 14-NH      | 8.13,s              |                     | 11,13,15,16                     | 15,17a/b               |
| 1'-NH      | 10.82,d,(2.4)       |                     | 2',3',4',9'                     |                        |
| 10'-NH     | 7.73,s              |                     | 11',13',15',16'                 | 11',12'a/b             |

**Supplementary Table 25** NMR data of compound NAS-17 in DMSO-d6

| <i>no.</i> | $\delta_{\text{H}}$ | $\delta_{\text{C}}$ | $^1\text{H}-^{13}\text{C}$ HMBC | ROESY              |
|------------|---------------------|---------------------|---------------------------------|--------------------|
| 2          | 5.60,s              | 81.9                | 3,4,9,11,7'                     | 1-NH,12b,6',8'     |
| 3          |                     | 58.5                |                                 |                    |
| 4          |                     | 132.4               |                                 |                    |
| 5          | 7.10,dd,(7.4,1.1)   | 124.0               | 3,7,9                           | 6                  |
| 6          | 6.61,m              | 118.0               | 4,8                             | 5,7                |
| 7          | 6.98,td,(7.6,1.2)   | 128.2               | 5,9                             | 8                  |
| 8          | 6.62,m              | 109.1               | 4,6                             | 7                  |
| 9          |                     | 149.6               |                                 |                    |
| 11         | 4.01,m              | 58.3                | 12,13                           | 2,12a              |
| 12a        | 3.01,dd,(12.4,5.7)  | 41.2                | 2,3,4                           | 12b                |
| 12b        | 2.54,m              |                     | 3,4,11,13,7'                    | 6',8',12a          |
| 13         |                     | 169.0               |                                 |                    |
| 15         | 4.00,m              | 59.5                | 16,17,18,19                     | 14-NH,17,18,19     |
| 16         |                     | 165.2               |                                 |                    |
| 17         | 2.36,m              | 28.5                | 15,16,18,19                     | 15,18,19           |
| 18         | 1.00,d,(7.2)        | 18.1                | 15,17,19                        | 15,17,19           |
| 19         | 0.87,d,(6.9)        | 16.5                | 15,17,18                        | 15,17,18           |
| 2'         | 7.04,d,(2.4)        | 124.8               | 3',4',9'                        | 1'-NH              |
| 3'         |                     | 108.8               |                                 |                    |
| 4'         |                     | 126.6               |                                 |                    |
| 5'         | 7.51,d,(8.4)        | 119.2               | 7',9'                           | 6'                 |
| 6'         | 7.01,dd,(8.4,1.7)   | 116.2               | 3,4',8'                         | 2,12b,5'           |
| 7'         |                     | 136.9               |                                 |                    |
| 8'         | 7.21,d,(1.6)        | 107.9               | 3,4',6'                         | 1'-NH,2,12a/b      |
| 9'         |                     | 136.1               |                                 |                    |
| 11'        | 4.08,m              | 55.2                | 3',12',13'                      | 14'-NH,12'b        |
| 12'a       | 3.12,dd,(14.5,5.5)  | 29.0                | 2',3',4',11',13'                | 11',12'b           |
| 12'b       | 3.05,dd,(14.5,4.5)  |                     | 2',3',4',11',13'                | 11',12'a           |
| 13'        |                     | 167.4               |                                 |                    |
| 15'        | 3.44,m              | 59.4                | 16',17',18',19'                 | 10'-NH,17',18',19' |
| 16'        |                     | 166.4               |                                 |                    |
| 17'        | 1.57,m              | 31.2                | 18',19'                         | 15',18',19'        |
| 18'        | 0.60,d,(7.1)        | 18.4                | 15',17',19'                     | 15',17',19'        |
| 19'        | 0.23,d,(6.9)        | 16.4                | 15',17',18'                     | 15',17',18'        |
| 1-NH       | 6.67,s              |                     | 3,4,9                           | 2                  |
| 14-NH      | 8.01,s              |                     | 11,13,15,16                     | 15                 |
| 1'-NH      | 10.78,d,(2.5)       |                     | 2',3',4',9'                     | 2',8'              |
| 10'-NH     | 7.87,d,(2.4)        |                     | 11',16'                         | 15'                |
| 14'-NH     | 7.90,d,(2.4)        |                     | 13',15'                         | 11'                |

**Supplementary Table 26** NMR data of compound NAS-18 in DMSO-d6

| <i>no.</i> | $\delta_{\text{H}}$ | $\delta_{\text{C}}$ | $^1\text{H}-^{13}\text{C}$ HMBC | ROESY              |
|------------|---------------------|---------------------|---------------------------------|--------------------|
| 2          | 5.68,s              | 81.3                | 3,4,9,11,6'                     | 1-NH,5',7'         |
| 3          |                     | 58.4                |                                 |                    |
| 4          |                     | 133.3               |                                 |                    |
| 5          | 7.09,m              | 123.8               | 3,7,9                           | 6                  |
| 6          | 6.58,t,(7.3)        | 118.1               | 4,8                             | 7                  |
| 7          | 6.94,t,(7.5)        | 127.9               | 5,9                             | 6,8                |
| 8          | 6.61,d,(7.7)        | 109.0               | 4,6                             | 7                  |
| 9          |                     | 149.4               |                                 |                    |
| 11         | 4.00,m              | 58.2                | 12,13                           | 12a                |
| 12a        | 3.03,dd,(12.4,5.7)  | 41.0                | 2,3,4                           | 11,12b             |
| 12b        | 2.60,t,(12.0)       |                     | 3,4,13                          | 5',12a             |
| 13         |                     | 169.1               |                                 |                    |
| 15         | 3.99,m              | 59.6                | 16,17,18,19                     | 14-NH,17,18,19     |
| 16         |                     | 165.1               |                                 |                    |
| 17         | 2.35,m              | 28.5                | 15,16,18,19                     | 15,18,19           |
| 18         | 1.00,d,(6.7)        | 18.1                | 15,17,19                        | 15,17,19           |
| 19         | 0.86,d,(6.4)        | 16.5                | 15,17,18                        | 15,17,18           |
| 2'         | 7.08,m              | 125.0               | 3',9'                           | 1'-NH,12'a         |
| 3'         |                     | 109.2               |                                 |                    |
| 4'         |                     | 127.6               |                                 |                    |
| 5'         | 7.65,s              | 114.7               | 3,3',7',9'                      | 2,12a/b            |
| 6'         |                     | 134.6               |                                 |                    |
| 7'         | 6.97,d,(8.5)        | 119.0               | 3,5',9'                         | 2,8'               |
| 8'         | 7.18,d,(8.2)        | 111.4               | 4',6'                           | 1'-NH,7'           |
| 9'         |                     | 134.9               |                                 |                    |
| 11'        | 4.13,m              | 55.1                | 3',12',13'                      | 14'-NH,12'a/b      |
| 12'a       | 3.20,dd,(14.4,5.5)  | 28.8                | 2',3',4',11'                    | 11',12'b           |
| 12'b       | 3.08,dd,(14.7,5.1)  |                     | 2',3',4',11',13'                | 11',12'a           |
| 13'        |                     | 167.6               |                                 |                    |
| 15'        | 3.52,m              | 59.4                | 16',19'                         | 10'-NH,17',18',19' |
| 16'        |                     | 166.4               |                                 |                    |
| 17'        | 1.71,m              | 31.1                | 18'                             | 15',18',19'        |
| 18'        | 0.67,d,(6.7)        | 18.5                | 15',17',19'                     | 15',17',19'        |
| 19'        | 0.20,d,(6.6)        | 16.2                | 15',17',18'                     | 17',18'            |
| 1-NH       | 6.64,s              |                     | 2,3,4,9                         | 2                  |
| 14-NH      | 8.00,s              |                     | 11,13,15,16                     | 15                 |
| 1'-NH      | 10.81,s             |                     | 2',3',4',9'                     | 2',8'              |
| 10'-NH     | 7.90,d,(2.8)        |                     | 11',15',16'                     | 15'                |
| 14'-NH     | 7.93,s              |                     | 13',15'                         | 11'                |

**Supplementary Table 27** NMR data of compound NAS-19 in DMSO-d6

| <i>no.</i> | $\delta_{\text{H}}$ | $\delta_{\text{C}}$ | $^1\text{H}-^{13}\text{C}$ HMBC | ROESY              |
|------------|---------------------|---------------------|---------------------------------|--------------------|
| 2          | 5.60,s              | 81.9                | 3,4,9,11,7'                     | 1-NH,12b,6',8'     |
| 3          |                     | 58.4                |                                 |                    |
| 4          |                     | 132.3               |                                 |                    |
| 5          | 7.10,dd,(7.4,1.2)   | 123.9               | 3,7,9                           |                    |
| 6          | 6.60,dd,(7.3,1.0)   | 117.9               | 8                               | 5,7                |
| 7          | 6.98,td,(7.6,1.3)   | 128.1               | 5,9                             | 8                  |
| 8          | 6.63,d,(7.7)        | 109.1               | 4,6                             | 7                  |
| 9          |                     | 149.6               |                                 |                    |
| 11         | 4.00,m              | 58.2                | 12,13                           | 12a                |
| 12a        | 3.01,dd,(12.4,5.7)  | 41.3                | 2,3,4                           | 11,12b             |
| 12b        | 2.54,t,(12.0)       |                     | 3,4,13,7'                       | 6',8',12a          |
| 13         |                     | 168.8               |                                 |                    |
| 15         | 4.04,d,(2.2)        | 59.1                | 16,17,18,20                     | 14-NH,17,18a/b,19  |
| 16         |                     | 165.1               |                                 |                    |
| 17         | 2.04,m              | 35.6                |                                 | 15,18a/b,20        |
| 18a        | 1.39,m              | 24.1                | 15,17,19,20                     | 17,20              |
| 18b        | 1.31,m              |                     | 17,19,20                        | 17,20              |
| 19         | 0.83,t,(7.5)        | 12.2                | 17,18                           | 17,18a/b,20        |
| 20         | 0.97,d,(7.2)        | 15.0                | 15,17,18                        | 15,17,18a/b        |
| 2'         | 7.05,d,(2.4)        | 124.8               | 3',4',9'                        | 1'-NH,12'a/b       |
| 3'         |                     | 108.8               |                                 |                    |
| 4'         |                     | 126.6               |                                 |                    |
| 5'         | 7.51,d,(8.4)        | 119.2               | 3',4'                           | 6'                 |
| 6'         | 7.00,dd,(8.4,1.7)   | 116.2               | 3,4',8'                         | 2,5'               |
| 7'         |                     | 136.9               |                                 |                    |
| 8'         | 7.21,d,(1.6)        | 107.8               | 3,4',6'                         | 1'-NH,2,12a/b      |
| 9'         |                     | 136.0               |                                 |                    |
| 11'        | 4.08,m              | 55.2                | 3',13'                          | 14'-NH,12'a/b      |
| 12'a       | 3.12,dd,(14.5,5.5)  | 29.0                | 3',4',11',13'                   | 11',12'b           |
| 12'b       | 3.05,dd,(14.5,4.5)  |                     | 3',4',11',13'                   | 11',12'a           |
| 13'        |                     | 167.4               |                                 |                    |
| 15'        | 3.44,m              | 59.4                | 16',17',18',19'                 | 10'-NH,17',18',19' |
| 16'        |                     | 166.3               |                                 |                    |
| 17'        | 1.57,m              | 31.2                | 15',18',19'                     | 15',18',19'        |
| 18'        | 0.61,d,(7.0)        | 18.4                | 15',17',19'                     | 15',17',19'        |
| 19'        | 0.24,d,(6.8)        | 16.4                | 15',17',18'                     | 15',17',18'        |
| 1-NH       | 6.65,s              |                     | 3,4,9                           | 2                  |
| 14-NH      | 8.00,s              |                     | 13,16                           | 15,17              |
| 1'-NH      | 10.77,d,(2.4)       |                     | 2',3',4',9'                     | 2',8'              |
| 10'-NH     | 7.86,d,(2.4)        |                     | 11',15',16'                     | 15'                |
| 14'-NH     | 7.89,d,(2.4)        |                     | 13',15'                         | 11'                |

**Supplementary Table 28** NMR data of compound NAS-20 in DMSO-d<sub>6</sub>

| <i>no.</i> | $\delta_{\text{H}}$ | $\delta_{\text{C}}$ | $^1\text{H}-^{13}\text{C}$ HMBC | ROESY             |
|------------|---------------------|---------------------|---------------------------------|-------------------|
| 2          | 5.67,s              | 81.4                | 4,9,11,12,6'                    | 1-NH,12b,5',7'    |
| 3          |                     | 58.3                |                                 |                   |
| 4          |                     | 133.2               |                                 |                   |
| 5          | 7.07,m              | 123.8               | 3                               | 6                 |
| 6          | 6.58,td,(7.4,1.1)   | 118.1               | 4,8                             | 7                 |
| 7          | 6.94,td,(7.6,1.3)   | 127.9               | 5,9                             | 5,6,8             |
| 8          | 6.62,m              | 109.0               | 4,6,9                           | 7                 |
| 9          |                     | 149.4               |                                 |                   |
| 11         | 3.99,m              | 58.1                | 12,13                           | 12a               |
| 12a        | 3.02,dd,(12.4,5.6)  | 41.0                | 2,3,4,11                        | 11,12b            |
| 12b        | 2.60,t,(12.0)       |                     | 3,4,11,13,6'                    | 5',12a            |
| 13         |                     | 168.8               |                                 |                   |
| 15         | 4.04,t,(2.2)        | 59.1                | 16,17,18,20                     | 14-NH,17,18a/b,20 |
| 16         |                     | 165.1               |                                 |                   |
| 17         | 2.04,m              | 35.7                |                                 | 15,18a/b,20       |
| 18a        | 1.38,m              | 24.1                | 17,19,20                        | 17                |
| 18b        | 1.30,m              |                     | 17,19,20                        | 17                |
| 19         | 0.82,t,(7.4)        | 12.2                | 17,18                           | 17,18a/b          |
| 20         | 0.97,d,(7.1)        | 14.9                | 15,17,18                        | 17,18a/b          |
| 2'         | 7.08,m              | 125.0               | 3',9'                           | 1'-NH,12'a        |
| 3'         |                     | 109.2               |                                 |                   |
| 4'         |                     | 127.5               |                                 |                   |
| 5'         | 7.65,d,(1.8)        | 114.6               | 3,3',7',9'                      | 2,12a/b           |
| 6'         |                     | 134.6               |                                 |                   |
| 7'         | 6.97,dd,(8.5,1.8)   | 118.9               | 3,5',9'                         | 8'                |
| 8'         | 7.18,d,(8.6)        | 111.3               | 4',6'                           | 1'-NH,7'          |
| 9'         |                     | 134.9               |                                 |                   |
| 11'        | 4.13,m              | 55.0                | 3',12',13'                      | 14'-NH,12'a/b     |
| 12'a       | 3.20,dd,(14.4,5.4)  | 28.8                | 2',3',4',11',13'                | 11',12'b          |
| 12'b       | 3.09,dd,(14.4,4.7)  |                     | 2',3',4',11',13'                | 11',12'a          |
| 13'        |                     | 167.5               |                                 |                   |
| 15'        | 3.52,m              | 59.4                | 17',18',19'                     | 10'-NH,17',18'    |
| 16'        |                     | 166.4               |                                 |                   |
| 17'        | 1.72,m              | 31.1                | 15',16',18',19'                 | 15',18',19'       |
| 18'        | 0.68,d,(7.0)        | 18.5                | 15',17',19'                     | 17',19'           |
| 19'        | 0.23,d,(6.7)        | 16.3                | 15',17',18'                     | 17',18'           |
| 1-NH       | 6.61,m              |                     | 4                               |                   |
| 14-NH      | 7.98,s              |                     | 13,16                           | 15                |
| 1'-NH      | 10.80,d,(2.4)       |                     | 2',3',4',9'                     | 2'                |
| 10'-NH     | 7.90,m              |                     | 11',16'                         | 15'               |
| 14'-NH     | 7.91,m              |                     | 13',15'                         | 11'               |

**Supplementary Table 29** NMR data of compound NAS-21 in DMSO-d6

| <i>no.</i> | $\delta_{\text{H}}$ | $\delta_{\text{C}}$ | $^1\text{H}-^{13}\text{C}$ HMBC | ROESY          |
|------------|---------------------|---------------------|---------------------------------|----------------|
| 2          | 5.55,s              | 81.9                | 4,9,7'                          | 1-NH,12b,6',8' |
| 3          |                     | 58.4                |                                 |                |
| 4          |                     | 132.4               |                                 |                |
| 5          | 7.13,dd,(7.5,1.2)   | 123.9               | 3,7,9                           | 6              |
| 6          | 6.62,m              | 118.0               | 4                               | 5,7            |
| 7          | 6.98,dd,(7.5,1.4)   | 128.1               | 5,9                             | 8              |
| 8          | 6.64,m              | 109.4               | 4                               | 7              |
| 9          |                     | 149.5               |                                 |                |
| 11         | 4.08,m              | 58.7                | 13                              | 12a            |
| 12a        | 3.01,dd,(12.5,6.0)  | 40.5                | 2,3,4                           | 11,12b         |
| 12b        | 2.60,m              |                     | 4,11,13,7'                      | 8',12a         |
| 13         |                     | 169.2               |                                 |                |
| 15         | 4.09,m              | 52.7                | 16,17,18                        | 14-NH,17a/b    |
| 16         |                     | 166.5               |                                 |                |
| 17a        | 1.79,m              | 38.2                | 16,19,20                        | 17b,18         |
| 17b        | 1.43,m              |                     | 15,18,19                        | 17a            |
| 18         | 1.90,m              | 23.9                | 17,19,20                        | 17a/b,19       |
| 19         | 0.86,dd,(6.3,2.5)   | 22.7                | 17,18,20                        | 17a/b,18       |
| 20         | 0.85,dd,(6.3,2.5)   | 22.0                | 17,18,19                        | 18             |
| 2'         | 7.04,d,(2.4)        | 124.8               | 3',4',9'                        | 1'-NH          |
| 3'         |                     | 108.8               |                                 |                |
| 4'         |                     | 126.6               |                                 |                |
| 5'         | 7.51,d,(8.4)        | 119.1               | 3',4',7',9'                     | 6'             |
| 6'         | 7.03,dd,(8.5,1.7)   | 116.2               | 3,8'                            | 2,5'           |
| 7'         |                     | 136.7               |                                 |                |
| 8'         | 7.20,d,(1.7)        | 107.9               | 3,4',6'                         | 1'-NH,2,12a/b  |
| 9'         |                     | 136.0               |                                 |                |
| 11'        | 4.07,m              | 55.2                | 3',12',13'                      | 14'-NH,12'a/b  |
| 12'a       | 3.12,dd,(14.5,5.5)  | 29.0                | 3',4',11',13'                   | 11',12'b       |
| 12'b       | 3.05,dd,(14.6,4.8)  |                     | 3',4',11',13'                   | 11',12'a       |
| 13'        |                     | 167.4               |                                 |                |
| 15'        | 3.45,m              | 59.4                | 16',17',18',19'                 | 10'-NH,17',18' |
| 16'        |                     | 166.3               |                                 |                |
| 17'        | 1.59,td,(7.0,4.1)   | 31.2                | 18',19'                         | 18'            |
| 18'        | 0.61,d,(7.0)        | 18.4                | 15',17',19'                     | 17',19'        |
| 19'        | 0.25,d,(6.8)        | 16.4                | 15',17',18'                     | 17',18'        |
| 1-NH       | 6.60,m              |                     |                                 |                |
| 14-NH      | 8.05,s              |                     | 11,15,16                        | 11,15,17b      |
| 1'-NH      | 10.76,d,(2.4)       |                     | 2',3',4',9'                     | 2',8'          |
| 10'-NH     | 7.86,d,(2.4)        |                     | 11',15',16'                     | 15'            |
| 14'-NH     | 7.89,d,(2.4)        |                     | 13',15'                         |                |

**Supplementary Table 30** NMR data of compound NAS-22 in DMSO-d6

| <i>no.</i> | $\delta_{\text{H}}$ | $\delta_{\text{C}}$ | $^1\text{H}-^{13}\text{C}$ HMBC | ROESY          |
|------------|---------------------|---------------------|---------------------------------|----------------|
| 2          | 5.65,s              | 81.4                | 4,9                             | 1-NH,12b,5',7' |
| 3          |                     | 58.4                |                                 |                |
| 4          |                     | 133.2               |                                 |                |
| 5          | 7.12,dd,(7.4,1.2)   | 123.8               | 3,7,9                           | 6,7            |
| 6          | 6.60,dd,(7.5,1.1)   | 118.1               | 8                               | 5,7            |
| 7          | 6.95,td,(7.6,1.3)   | 127.9               | 5,9                             | 6,8            |
| 8          | 6.62,dd,(7.8,0.9)   | 109.3               | 4,6                             | 7              |
| 9          |                     | 149.3               |                                 |                |
| 11         | 4.07,m              | 58.7                | 12,13                           | 12a            |
| 12a        | 3.04,dd,(12.5,5.9)  | 40.4                | 2,3,4                           | 11,12b         |
| 12b        | 2.63,t,(12.6)       |                     | 3,4,13                          | 5',11,12a      |
| 13         |                     | 169.3               |                                 |                |
| 15         | 4.08,m              | 52.7                | 16,17,18                        | 14-NH,17a/b,18 |
| 16         |                     | 166.5               |                                 |                |
| 17a        | 1.79,m              | 38.3                | 15,16,19                        | 17b,19,20      |
| 17b        | 1.43,m              |                     | 15,16,18,20                     | 17a,19,20      |
| 18         | 1.90,m              | 24.0                | 15,17,19,20                     | 17b,19,20      |
| 19         | 0.86,d,(6.5)        | 22.8                | 17,18,20                        | 15,17a/b,18    |
| 20         | 0.85,d,(6.5)        | 22.0                | 17,18,19                        | 15,17a/b,18    |
| 2'         | 7.08,d,(2.4)        | 125.0               | 3',4',9'                        | 1'-NH,12'a/b   |
| 3'         |                     | 109.2               |                                 |                |
| 4'         |                     | 127.6               |                                 |                |
| 5'         | 7.66,d,(1.9)        | 114.7               | 3,3',7',9'                      | 12a/b          |
| 6'         |                     | 134.4               |                                 |                |
| 7'         | 6.99,dd,(8.6,1.8)   | 119.0               | 3,5',9'                         | 2,12a/b,8'     |
| 8'         | 7.18,d,(8.5)        | 111.3               | 4',6'                           | 1'-NH,7'       |
| 9'         |                     | 134.9               |                                 |                |
| 11'        | 4.12,m              | 55.1                |                                 | 14'-NH,12'a/b  |
| 12'a       | 3.20,dd,(14.4,5.4)  | 28.8                | 2',3',4',11',13'                | 11',12'b       |
| 12'b       | 3.08,dd,(14.4,4.8)  |                     | 2',3',4',11',13'                | 11',12'a       |
| 13'        |                     | 167.6               |                                 |                |
| 15'        | 3.51,m              | 59.4                | 16',17',18',19'                 | 10'-NH,17',18' |
| 16'        |                     | 166.4               |                                 |                |
| 17'        | 1.70,td,(7.0,3.9)   | 31.1                | 15',18',19'                     | 15',18',19'    |
| 18'        | 0.67,d,(7.1)        | 18.5                | 15',17',19'                     | 15',17',19'    |
| 19'        | 0.22,d,(6.8)        | 16.3                | 15',17',20'                     | 15',17',18'    |
| 1-NH       | 6.58,s              |                     | 3,4,9                           |                |
| 14-NH      | 8.05,s              |                     | 11,13,15,16,17                  | 11,17b         |
| 1'-NH      | 10.80,d,(2.4)       |                     | 2',3',4',9'                     | 2'             |
| 10'-NH     | 7.90,d,(2.5)        |                     | 11',16'                         | 15'            |
| 14'-NH     | 7.91,d,(2.3)        |                     | 13',15'                         | 11'            |



**Supplementary Table 31** NMR data of compound NAS-23 in DMSO-d<sub>6</sub>

| <i>no.</i> | $\delta_{\text{H}}$ | $\delta_{\text{C}}$ | $^1\text{H}-^{13}\text{C}$ HMBC | ROESY               |
|------------|---------------------|---------------------|---------------------------------|---------------------|
| 2          | 5.58,s              | 81.9                | 4,9,11,7'                       | 1-NH,12b,6',8'      |
| 3          |                     | 58.4                |                                 |                     |
| 4          |                     | 132.4               |                                 |                     |
| 5          | 7.13,d,(7.3)        | 123.9               | 3,7,9                           | 6,7                 |
| 6          | 6.62,m              | 117.9               | 4,8                             | 5                   |
| 7          | 6.98,t,(7.1)        | 128.2               | 5,9                             | 8                   |
| 8          | 6.63,m              | 109.3               | 6                               | 7                   |
| 9          |                     | 149.5               |                                 |                     |
| 11         | 4.05,m              | 58.8                | 12,13                           | 2,12a               |
| 12a        | 3.00,dd,(12.4,5.9)  | 40.7                | 2,3,4                           | 11,12b,             |
| 12b        | 2.60,m              |                     | 11                              | 2,12a, 6',8'        |
| 13         |                     | 169.0               |                                 |                     |
| 15         | 4.21,m              | 53.4                | 16,17,18                        | 14-NH,17a/b,18a/b   |
| 16         |                     | 165.5               |                                 |                     |
| 17a        | 2.07,m              | 29.0                | 15,18                           | 14-NH ,15,17b,18a/b |
| 17b        | 1.95,m              |                     | 15,18                           | 14-NH ,15,17a,18a/b |
| 18a        | 2.59,m              | 28.9                | 15,17,20                        | 15,17a/b            |
| 18b        | 2.55,m              |                     | 15,17,20                        | 15,17a/b            |
| 20         | 2.03,s              | 14.4                | 18                              | 18a/b               |
| 2'         | 7.04,m              | 124.8               | 3',4',9'                        | 1'-NH,11',12'a/b    |
| 3'         |                     | 108.8               |                                 |                     |
| 4'         |                     | 126.6               |                                 |                     |
| 5'         | 7.51,d,(8.4)        | 119.1               | 3',4',7',9'                     | 8',12'a/b           |
| 6'         | 7.03,m              | 116.3               | 8'                              | 2,12a/b,5'          |
| 7'         |                     | 136.7               |                                 |                     |
| 8'         | 7.20,d,(1.7)        | 107.9               | 3,4',6'                         | 2,12a/b,1'-NH       |
| 9'         |                     | 136.0               |                                 |                     |
| 11'        | 4.07,m              | 55.2                | 3',12',13'                      | 2',14'-NH,12'a/b    |
| 12'a       | 3.12,dd,(14.5,5.5)  | 29.0                | 2',3',4',11',13'                | 2',11',12'b         |
| 12'b       | 3.05,dd,(14.5,4.4)  |                     | 2',3',4',11',13'                | 2',11',12'a         |
| 13'        |                     | 167.4               |                                 |                     |
| 15'        | 3.45,m              | 59.4                | 16',17',18',19'                 | 10'-NH,17',18'      |
| 16'        |                     | 166.4               |                                 |                     |
| 17'        | 1.59,m              | 31.2                | 15',16',18',19'                 | 15',18',19'         |
| 18'        | 0.61,d,(7.1)        | 18.4                | 15',17',19'                     | 15',17',19'         |
| 19'        | 0.24,d,(6.8)        | 16.4                | 15',17',18'                     | 15',17',18'         |
| 1-NH       | 6.65,s              |                     | 3,4,9                           | 2                   |
| 14-NH      | 8.20,s              |                     | 11,13,15,16,17                  | 12b,15,17a/b        |
| 1'-NH      | 10.77,d,(2.4)       |                     | 2',4'                           | 2',8'               |
| 10'-NH     | 7.87,d,(2.4)        |                     | 11',15',16'                     | 15'                 |
| 14'-NH     | 7.90,d,(2.3)        |                     | 11',13',15'                     | 11'                 |

**Supplementary Table 32** NMR data of compound NAS-24 in DMSO-d6

| <i>no.</i> | $\delta_{\text{H}}$     | $\delta_{\text{C}}$ | $^1\text{H}-^{13}\text{C}$ HMBC | ROESY             |
|------------|-------------------------|---------------------|---------------------------------|-------------------|
| 2          | 5.66,s                  | 81.4                | 4,9                             | 1-NH,11,12b,5',7' |
| 3          |                         | 58.3                |                                 |                   |
| 4          |                         | 133.2               |                                 |                   |
| 5          | 7.11,d,(7.5)            | 123.8               | 3,7,9                           | 6,7               |
| 6          | 6.59,t,(7.4)            | 118.1               | 4,7,8                           | 5,7               |
| 7          | 6.95,td,(7.6,1.3)       | 127.9               | 5,9                             | 6,8               |
| 8          | 6.61,m                  | 109.2               | 6                               | 7                 |
| 9          |                         | 149.3               |                                 |                   |
| 11         | 4.05,m                  | 58.6                | 12,13                           | 2,12a             |
| 12a        | 3.02,dd,(12.4,5.8)      | 40.6                | 2,3,4,11                        | 11,12b,5'         |
| 12b        | 2.63,t,(12.0)           |                     | 3,4,11,13                       | 2,12a, 5',7'      |
| 13         |                         | 169.1               |                                 |                   |
| 15         | 4.21,m                  | 53.4                | 16,17,18                        | 14-NH,17a/b,18a/b |
| 16         |                         | 165.4               |                                 |                   |
| 17a        | 2.06,m                  | 29.1                | 15,16,18                        | 15,17b,18a        |
| 17b        | 1.94,m                  |                     | 15,16,18                        | 15,17a,18a        |
| 18a        | 2.59,ddd,(12.9,9.6,5.9) | 28.8                | 15,17,20                        | 15,17a/b          |
| 18b        | 2.54,m                  |                     | 15,17,20                        | 15,17a/b          |
| 20         | 2.03,s                  | 14.3                | 18                              | 17b,18a/b         |
| 2'         | 7.07,d,(2.3)            | 125.0               | 3',4',9'                        | 1'-NH,11',12'a/b  |
| 3'         |                         | 109.2               |                                 |                   |
| 4'         |                         | 127.6               |                                 |                   |
| 5'         | 7.65,d,(1.8)            | 114.7               | 3,3',7',9'                      | 2,12a/b           |
| 6'         |                         | 134.4               |                                 |                   |
| 7'         | 6.98,dd,(8.5,1.9)       | 119.0               | 3,5',9'                         | 2,12a/b,8'        |
| 8'         | 7.18,d,(8.5)            | 111.3               | 4',6'                           | 1'-NH,7'          |
| 9'         |                         | 134.9               |                                 |                   |
| 11'        | 4.12,m                  | 55.1                | 3',12',13'                      | 2',14'-NH,12'a/b  |
| 12'a       | 3.20,dd,(14.4,5.4)      | 28.8                | 2',3',4',11',13'                | 2',11',12'b       |
| 12'b       | 3.08,dd,(14.4,4.7)      |                     | 2',3',4',11',13'                | 2',11',12'a       |
| 13'        |                         | 167.6               |                                 |                   |
| 15'        | 3.51,m                  | 59.4                | 16',17',18',19'                 | 10'-NH,17',18'    |
| 16'        |                         | 166.4               |                                 |                   |
| 17'        | 1.71,pd,(7.2,2.1)       | 31.1                | 18',19'                         | 15',18',19'       |
| 18'        | 0.67,d,(7.1)            | 18.5                | 15',17',19'                     | 15',17',19'       |
| 19'        | 0.21,d,(6.8)            | 16.5                | 15',17',18'                     | 15',17',18'       |
| 1-NH       | 6.62,m                  |                     | 3,4,9                           | 2                 |
| 14-NH      | 8.19,s                  |                     | 11,15,16                        | 15,17a/b          |
| 1'-NH      | 10.81,d,(2.3)           |                     | 2',3',4',9'                     | 2',8'             |
| 10'-NH     | 7.91,d,(2.4)            |                     | 11',16'                         | 15'               |
| 14'-NH     | 7.92,d,(2.3)            |                     | 13',15'                         | 11'               |

**Supplementary Table 33** NMR data of compound NAS-25 in DMSO-d6

| <i>no.</i> | $\delta_{\text{H}}$      | $\delta_{\text{C}}$ | $^1\text{H}-^{13}\text{C}$ HMBC | ROESY              |
|------------|--------------------------|---------------------|---------------------------------|--------------------|
| 2          | 5.61,s                   | 81.4                | 4,9,11                          | 1-NH,11,5',7'      |
| 3          |                          | 58.4                |                                 |                    |
| 4          |                          | 133.0               |                                 |                    |
| 5          | 7.03,dd,(7.5,1.2)        | 123.9               | 3,7,9                           | 6                  |
| 6          | 6.55,td,(7.4,1.0)        | 118.0               | 8                               | 7                  |
| 7          | 6.93,td,(7.6,1.3)        | 127.9               | 5,9                             | 8                  |
| 8          | 6.57,d,(7.9)             | 108.8               | 4,6                             | 7                  |
| 9          |                          | 149.5               |                                 |                    |
| 11         | 3.88,m                   | 58.2                | 12,13                           | 12a                |
| 12a        | 2.78,dd,(12.1,5.4)       | 41.0                | 2,3,4                           | 11,12b             |
| 12b        | 1.93,t,(12.0)            |                     | 3,4,11,13                       | 12a,               |
| 13         |                          | 167.6               |                                 |                    |
| 15         | 4.43,t,(4.6)             | 55.7                | 16,17,18                        | 14-NH,17a/b        |
| 16         |                          | 164.7               |                                 |                    |
| 17a        | 3.13,m                   | 36.3                | 15,16,18,19,23                  | 15,17b             |
| 17b        | 3.01,dd,(13.9,5.4)       |                     | 15,16,18,19,23                  | 15,17a             |
| 18         |                          | 136.6               |                                 |                    |
| 19         | 7.19,m                   | 129.8               | 17,21,23                        | 17a/b,20           |
| 20         | 7.09,m                   | 128.0               | 18,22                           |                    |
| 21         | 7.07,m                   | 126.3               | 19,20,22,23                     |                    |
| 22         | 7.08,m                   | 128.0               | 18,20                           |                    |
| 23         | 7.19,m                   | 129.8               | 17,19,21                        | 17a/b,19           |
| 2'         | 7.10,m                   | 124.9               | 3',4',9'                        | 1'-NH,12'a/b       |
| 3'         |                          | 109.2               |                                 |                    |
| 4'         |                          | 127.4               |                                 |                    |
| 5'         | 7.47,d,(1.8)             | 114.7               | 3',7',9'                        | 2,12a/b            |
| 6'         |                          | 134.3               |                                 |                    |
| 7'         | 6.85,dd,(8.5,1.9)        | 119.0               | 3,5',9'                         | 2,8'               |
| 8'         | 7.18,m                   | 111.3               | 6'                              | 1'-NH,7'           |
| 9'         |                          | 134.8               |                                 |                    |
| 11'        | 4.12,m                   | 55.0                | 3',12',13'                      | 14'-NH12'a/b       |
| 12'a       | 3.19,dd,(14.4,5.8)       | 29.0                | 2',3',4',11',13'                | 11',12'b           |
| 12'b       | 3.10,m                   |                     | 2',3',4',11',13'                | 11',12'a           |
| 13'        |                          | 167.6               |                                 |                    |
| 15'        | 3.53,t,(2.4)             | 59.4                | 17',18',19'                     | 10'-NH,17',18',19' |
| 16'        |                          | 166.4               |                                 |                    |
| 17'        | 1.76,ddtt,(10.1,7.0,3.0) | 31.2                | 15',16',18',19'                 | 15',18',19'        |
| 18'        | 0.71,d,(7.0)             | 18.6                | 15',17',19'                     | 15',17',19'        |
| 19'        | 0.27,d,(6.7)             | 16.3                | 15',17',18'                     | 17',18'            |
| 1-NH       | 6.64,s                   |                     | 3,4,9                           | 2                  |
| 14-NH      | 8.11,s                   |                     | 11,13,15,16                     | 15,17a/b           |
| 1'-NH      | 10.82,d,(2.4)            |                     | 2',3',4',9'                     | 2'                 |
| 10'-NH     | 7.92,d,(2.5)             |                     | 11',16'                         | 15'                |
| 14'-NH     | 7.87,d,(2.4)             |                     | 13',15'                         | 11'                |

**Supplementary Table 34** NMR data of compound NAS-26 in DMSO-d6

| <i>no.</i> | $\delta_{\text{H}}$ | $\delta_{\text{C}}$ | $^1\text{H}-^{13}\text{C}$ HMBC | ROESY            |
|------------|---------------------|---------------------|---------------------------------|------------------|
| 2          | 5.61,s              | 85.1                | 9,7'                            | 11,6',8'         |
| 3          |                     | 59.4                |                                 |                  |
| 4          |                     | 134.6               |                                 |                  |
| 5          | 6.80,d,(7.3)        | 123.8               | 7,9                             | 6                |
| 6          | 6.58,m              | 118.2               | 4,8                             | 5,7              |
| 7          | 6.99,t,(7.6)        | 128.0               | 5,9                             | 6,8              |
| 8          | 6.63,d,(7.9)        | 109.5               | 4,6                             | 5,7              |
| 9          |                     | 148.2               |                                 |                  |
| 11         | 4.59,m              | 58.2                |                                 | 12a              |
| 12a        | 3.03,m              | 39.1                | 7'                              | 12b              |
| 12b        | 2.34,dd,(13.7,9.7)  |                     | 11,13                           | 12a,             |
| 13         |                     | 169.9               |                                 |                  |
| 15         | 4.29,t,(5.5)        | 56.1                | 16,18                           | 17a/b            |
| 16         |                     | 167.9               |                                 |                  |
| 17a        | 3.01,m              | 33.5                | 15,18,19,23                     | 17b              |
| 17b        | 2.87,dd,(14.6,5.6)  |                     | 15,18,19,23                     | 17a              |
| 18         |                     | 127.5               |                                 |                  |
| 19         | 7.08,m              | 130.7               | 17,21,23                        | 20               |
| 20         | 6.59,m              | 115.0               | 18,22                           | 19               |
| 21         |                     | 155.9               |                                 |                  |
| 22         | 7.09,m              | 115.0               | 18,20                           | 23               |
| 23         | 6.59,m              | 130.7               | 17,19,21                        | 19               |
| 2'         | 7.06,d,(2.3)        | 125.2               | 3',4',9'                        | 1'-NH,11',12'a/b |
| 3'         |                     | 108.9               |                                 |                  |
| 4'         |                     | 126.7               |                                 |                  |
| 5'         | 7.54,d,(8.4)        | 119.5               | 3',7'                           | 6'               |
| 6'         | 6.94,d,(8.4)        | 117.7               | 3,4',8'                         | 2,12a,5'         |
| 7'         |                     | 135.9               |                                 |                  |
| 8'         | 7.20,s              | 109.0               | 3,4',6'                         | 1'-NH,2,12a/b    |
| 9'         |                     | 136.2               |                                 |                  |
| 11'        | 4.10,m              | 55.3                |                                 | 12'a/b           |
| 12'a       | 3.16,dd,(14.4,5.4)  | 29.1                | 3',4'                           |                  |
| 12'b       | 3.05,m              |                     | 3'                              |                  |
| 13'        |                     | 167.6               |                                 |                  |
| 15'        | 3.44,m              | 59.5                |                                 |                  |
| 16'        |                     | 166.6               |                                 |                  |
| 17'        | 1.54,m              | 31.4                |                                 | 18',19'          |
| 18'        | 0.60,d,(7.0)        | 18.5                | 15',17',19'                     | 17',19'          |
| 19'        | 0.20,d,(6.9)        | 16.5                | 15',17',18'                     | 17',18'          |
| 1-NH       | 7.09,m              |                     |                                 | 2                |
| 14-NH      | 7.80,s              |                     | 11,15,16                        | 15,17b           |
| 1'-NH      | 10.78,d,(2.3)       |                     | 2',3',4',9'                     | 8'               |
| 10'-NH     | 7.84,d,(2.4)        |                     | 11',16'                         | 15'              |
| 14'-NH     | 7.91,d,(2.3)        |                     | 13',15'                         | 11'              |

**Supplementary Table 35** NMR data of compound NAS-27 in DMSO-d6

| <i>no.</i> | $\delta_{\text{H}}$ | $\delta_{\text{C}}$ | $^1\text{H}-^{13}\text{C}$ HMBC | ROESY                |
|------------|---------------------|---------------------|---------------------------------|----------------------|
| 2          | 5.84 s              | 80.3,80.4           | 3,4,9,11,12,6'                  | 1-NH,11,12a/b,5'     |
| 3          |                     | 56.5                |                                 |                      |
| 4          |                     | 126.4               |                                 |                      |
| 5          | 7.27,dd,(8.2,5.7)   | 125.6,125.7         | 3,7,9                           | 6,12a/b              |
| 6          | 6.44,m              | 103.9,104.0         | 4,7,8                           | 5,8                  |
| 7          |                     | 162.7,163.8         |                                 |                      |
| 8          | 6.37,dd,(10.2,2.4)  | 96.3,96.5           | 4,6,7,9                         | 1-NH,6               |
| 9          |                     | 151.5,151.6         |                                 |                      |
| 11         | 4.26,m              | 59.6                | 12,13                           | 2,12a/b              |
| 12a        | 2.96,m              | 40.5,40.6           | 2,3,4,11                        | 11,12b,5'            |
| 12b        | 2.67,d,(13.0)       |                     | 3,4,11,13,6'                    | 2,11,12a,5'          |
| 13         |                     | 165.3               |                                 |                      |
| 15         | 4.33,m              | 59.7                | 16,17                           | 17a/b,18a/b,19b      |
| 16         |                     | 166.1               |                                 |                      |
| 17a        | 2.17,m              | 27.5                | 15,18,19                        | 15,17b,19a/b         |
| 17b        | 1.93,m              |                     | 15,16,18                        | 15,17a,19a/b         |
| 18a        | 1.91,m              | 22.6                | 15,17                           | 15,18b,19a/b         |
| 18b        | 1.82,m              |                     | 15,17,19                        | 15,18a,19a/b         |
| 19a        | 3.41,m              | 44.7                | 11,17,18                        | 17a/b,18a/b,19b      |
| 19b        | 3.35,m              |                     | 11,17,18                        | 17a/b,18a/b,19a      |
| 2'         | 7.15,m              | 125.2               | 3',4',9',12'                    | 1'-NH,11',12'a/b     |
| 3'         |                     | 109.9               |                                 |                      |
| 4'         |                     | 123.5               |                                 |                      |
| 5'         | 7.37,d,(7.9)        | 117.3               | 3,3',7',9'                      | 11                   |
| 6'         |                     | 121.0,121.1         |                                 |                      |
| 7'         |                     | 156.5,157.5         |                                 |                      |
| 8'         | 7.16,m              | 98.5,98.6           | 4',6',7'                        | 1'-NH                |
| 9'         |                     | 134.6,134.7         |                                 |                      |
| 11'        | 4.27,m              | 54.9                | 3',12',13',16'                  | 2',10'-NH,12'a/b,15' |
| 12'a       | 3.12,m              | 25.5                | 2',3',11',13'                   | 2',10'-NH,11',12'b   |
| 12'b       | 2.99,m              |                     | 2',3',11',13'                   | 2',10'-NH,11',12'a   |
| 13'        |                     | 165.4               |                                 |                      |
| 15'        | 4.06,m              | 58.5                | 16',17',18'                     | 10'-NH,17'a/b,18'a/b |
| 16'        |                     | 169.1               |                                 |                      |
| 17'a       | 1.99,m              | 27.7                | 15',18',19'                     | 15',17'b,18'a,19'b   |
| 17'b       | 1.40,m              |                     | 15',16',18'                     | 15',17'a,18'a/b,19'a |
| 18'a       | 1.69,m              | 21.9                | 17',19'                         | 15',17'a/b,18'b,19'b |
| 18'b       | 1.59,m              |                     | 15'                             | 15',17'a/b,18'b,19'b |
| 19a'       | 3.31,m              | 44.6                | 13',15',17',18'                 | 17'a/b,18'b,19'b     |
| 19'b       | 3.22,m              |                     | 15',17',18'                     | 15',17'a/b,18'b,19'a |
| 1-NH       | 7.03,s              |                     | 2,3,4,9                         | 2,8                  |
| 1'-NH      | 10.94,d,(2.3)       |                     | 3',4',9'                        | 2',8'                |
| 10'-NH     | 7.80,s              |                     | 11',12',13',15',16'             | 11',12'a/b           |

**Supplementary Table 36** NMR data of compound NAS-28 in DMSO-d6

| <i>no.</i> | $\delta_{\text{H}}$ | $\delta_{\text{C}}$ | $^1\text{H}-^{13}\text{C}$ HMBC | ROESY                |
|------------|---------------------|---------------------|---------------------------------|----------------------|
| 2          | 6.02 s              | 79.9                | 3,4,9,11,12,6'                  | 1-NH,12a,5'          |
| 3          |                     | 58.8                |                                 |                      |
| 4          |                     | 129.7               |                                 |                      |
| 5          | 7.33,dd,(8.0,1.9)   | 126.9               | 3,7,9                           | 6                    |
| 6          | 6.73,dt,(7.9,2.0)   | 117.3               | 4,7,8                           | 5                    |
| 7          |                     | 133.1               |                                 |                      |
| 8          | 6.62,m              | 108.7               | 4,6,7,9                         | 1-NH                 |
| 9          |                     | 151.6               |                                 |                      |
| 11         | 4.33,m              | 59.7                | 12,13                           |                      |
| 12a        | 3.14,m              | 40.6                | 3,4,11,13,7'                    | 11,12b,5'            |
| 12b        | 2.79,m              |                     | 2,3,4                           | 12a                  |
| 13         |                     | 166.0               |                                 |                      |
| 15         | 4.33,m              | 59.7                | 16,17                           | 17a/b,18b            |
| 16         |                     | 165.3               |                                 |                      |
| 17a        | 2.17,m              | 27.4                | 19                              | 15,18a,19b           |
| 17b        | 1.91,m              |                     | 15,16,18                        | 15,17a,19b           |
| 18a        | 1.91,m              | 22.5                | 15,17,19                        | 15,17a,19b           |
| 18b        | 1.82,m              |                     |                                 | 15,19b               |
| 19a        | 3.43,m              | 44.7                | 15,17,18                        | 17b                  |
| 19b        | 3.38,m              |                     |                                 | 19a                  |
| 2'         | 7.20,d,(2.3)        | 125.9               | 3',4',9',12'                    | 1'-NH,11',12'a/b     |
| 3'         |                     | 110.0               |                                 |                      |
| 4'         |                     | 125.9               |                                 |                      |
| 5'         | 7.44,d,(1.8)        | 119.5               | 3,4',7',9'                      | 2,12b,11',12'a/b     |
| 6'         |                     | 127.7               |                                 |                      |
| 7'         |                     | 125.1               |                                 |                      |
| 8'         | 7.46,m              | 114.0               | 4',6',7'                        | 1'-NH                |
| 9'         |                     | 135.2               |                                 |                      |
| 11'        | 4.29,m              | 54.7                | 3',12',13',16'                  | 2',10'-NH,12'a/b     |
| 12'a       | 3.09,dd,(15.0,4.8)  | 25.3                | 2',3',4',11',13'                | 10'-NH,11',12'b      |
| 12'b       | 2.93,m              |                     |                                 | 10'-NH,11',12'a      |
| 13'        |                     | 165.3               |                                 |                      |
| 15'        | 4.07,m              | 58.4                | 16'                             | 17'a/b,18'a/b,19'b   |
| 16'        |                     | 169.1               |                                 |                      |
| 17'a       | 2.00,m              | 27.6                | 15',16',18'                     | 15',17'b,18'a/b      |
| 17'b       | 1.43,m              |                     | 18',19'                         | 15',17'a,18'a/b,19'a |
| 18'a       | 1.71,m              | 22.0                | 17',19'                         | 15',17'a/b,18'b,19'a |
| 18'b       | 1.61,m              |                     |                                 | 15',17'a/b,18'a,19'a |
| 19'a       | 3.31,m              | 44.6                | 13',15',18',19'                 |                      |
| 19'b       | 3.23,m              |                     | 18',19'                         |                      |
| 1-NH       | 7.04,s              |                     | 2,3,4,9                         | 2,8                  |
| 1'-NH      | 11.00,d,(2.4)       |                     | 3',4',9'                        | 2',8'                |
| 10'-NH     | 7.80,s              |                     | 11',13',15',16'                 | 11',12'a/b           |

**Supplementary Table 37** NMR data of compound NAS-29 in DMSO-d6

| <i>no.</i> | $\delta_{\text{H}}$ | $\delta_{\text{C}}$ | $^1\text{H}-^{13}\text{C}$ HMBC | ROESY          |
|------------|---------------------|---------------------|---------------------------------|----------------|
| 2          | 5.70,s              | 81.5                | 4,9,11,6'                       | 1-NH,12b,5',7' |
| 3          |                     | 58.4                |                                 |                |
| 4          |                     | 133.1               |                                 |                |
| 5          | 7.13,d,(7.6)        | 123.9               | 3,7,9                           |                |
| 6          | 6.58,t,(7.4)        | 118.1               | 4,8                             |                |
| 7          | 6.96,t,(7.6)        | 128.1               | 5,9                             |                |
| 8          | 6.62,m              | 109.1               | 4,6                             |                |
| 9          |                     | 149.5               |                                 |                |
| 11         | 4.00,m              | 58.2                | 12,13                           |                |
| 12a        | 3.08,m              | 41.1                | 2,4,11                          |                |
| 12b        | 2.58,t,(12.1)       |                     | 4,11,13,6'                      |                |
| 13         |                     | 169.1               |                                 |                |
| 15         | 3.99,m              | 59.6                | 16,17,18,19                     |                |
| 16         |                     | 165.2               |                                 |                |
| 17         | 2.36,m              | 28.6                | 15,16,18,19                     |                |
| 18         | 0.99,d,(7.1)        | 18.1                | 15,17,19                        |                |
| 19         | 0.85,d,(6.9)        | 16.5                | 15,17,18                        |                |
| 2'         | 7.14,d,(2.3)        | 125.1               | 3',4',9'                        |                |
| 3'         |                     | 109.4               |                                 |                |
| 4'         |                     | 127.1               |                                 |                |
| 5'         | 7.61,s              | 114.6               | 3,3',7',9'                      | 2,12a/b        |
| 6'         |                     | 134.6               |                                 |                |
| 7'         | 7.04,d,(8.5)        | 119.2               | 3,5',9'                         | 2              |
| 8'         | 7.25,d,(8.5)        | 111.6               | 4',6'                           |                |
| 9'         |                     | 134.9               |                                 |                |
| 11'        | 4.32,m              | 55.3                | 3',12',13'                      |                |
| 12'a       | 3.21,m              | 26.1                | 2',3',4',11',13'                |                |
| 12'b       | 3.08,m              |                     | 2',3',4',11',13'                |                |
| 13'        |                     | 165.5               |                                 |                |
| 15'        | 4.02,m              | 58.5                | 16',17'                         |                |
| 16'        |                     | 168.9               |                                 |                |
| 17'a       | 1.93,m              | 27.7                | 19'                             |                |
| 17'b       | 1.44,m              |                     |                                 |                |
| 18'a       | 1.65,m              | 21.8                |                                 |                |
| 18'b       | 1.48,m              |                     |                                 |                |
| 19'a       | 3.35,m              | 44.6                | 15',17',18'                     |                |
| 19'b       | 3.20,m              |                     | 17',18'                         |                |
| 1-NH       | 6.63,m              |                     | 3,4,9                           |                |
| 14-NH      | 7.99,s              |                     | 11,13,15,16,17                  |                |
| 1'-NH      | 10.83,d,(2.4)       |                     | 2',3',4',9'                     |                |
| 10'-NH     | 7.75,s              |                     | 11',12',13',15',16'             |                |

**Supplementary Table 38** NMR data of compound NAS-30 in DMSO-d6

| <i>no.</i> | $\delta_{\text{H}}$ | $\delta_{\text{C}}$ | $^1\text{H}-^{13}\text{C}$ HMBC | ROESY          |
|------------|---------------------|---------------------|---------------------------------|----------------|
| 2          | 5.64,s              | 81.5                | 4,9,11,6'                       | 1-NH,12b,5',7' |
| 3          |                     | 58.3                |                                 |                |
| 4          |                     | 133.0               |                                 |                |
| 5          | 7.11,d,(6.9)        | 123.9               | 3,7,9                           |                |
| 6          | 6.58,td,(7.4,1.1)   | 117.9               | 4,8                             |                |
| 7          | 6.96,td,(7.5,1.3)   | 128.0               | 5,9                             |                |
| 8          | 6.62,d,(7.8)        | 108.9               | 4,6                             |                |
| 9          |                     | 149.6               |                                 |                |
| 11         | 4.00,m              | 58.1                | 13                              | 14-NH,12a      |
| 12a        | 2.98,m              | 41.1                | 2,4                             |                |
| 12b        | 2.60,m              |                     | 4,11                            |                |
| 13         |                     | 168.9               |                                 |                |
| 15         | 4.00,m              | 59.6                | 16,17,19                        |                |
| 16         |                     | 165.0               |                                 |                |
| 17         | 2.35,m              | 28.7                | 16,18,19                        |                |
| 18         | 0.99,d,(7.2)        | 18.0                | 15,17,19                        |                |
| 19         | 0.85,d,(6.9)        | 16.4                | 15,17,18                        |                |
| 2'         | 7.06,d,(2.3)        | 125.3               | 3',4',9'                        |                |
| 3'         |                     | 108.7               |                                 |                |
| 4'         |                     | 126.9               |                                 |                |
| 5'         | 7.51,d,(1.8)        | 114.1               | 3,3',7',9'                      | 2,12a/b,7'     |
| 6'         |                     | 134.6               |                                 |                |
| 7'         | 7.00,dd,(8.5,1.8)   | 119.5               | 11,5',9'                        | 2,12a/b        |
| 8'         | 7.25,d,(8.5)        | 111.7               | 4',6'                           |                |
| 9'         |                     | 134.8               |                                 |                |
| 11'        | 3.97,m              | 57.6                | 3',12',13'                      |                |
| 12'a       | 3.21,m              | 29.6                | 2',3',4',11'                    |                |
| 12'b       | 3.00,m              |                     | 2',3',4',11'                    |                |
| 13'        |                     | 165.4               |                                 |                |
| 15'        | 2.60,m              | 57.1                |                                 |                |
| 16'        |                     | 168.3               |                                 |                |
| 17'a       | 1.79,m              | 28.5                | 19'                             |                |
| 17'b       | 1.49,m              |                     | 15',16'                         |                |
| 18'a       | 1.63,m              | 21.3                |                                 |                |
| 18'b       | 1.17,m              |                     |                                 |                |
| 19'a       | 3.24,m              | 44.4                | 13'                             |                |
| 19'b       | 2.82,m              |                     | 13'                             |                |
| 1-NH       | 6.65,m              |                     | 3,4,9                           |                |
| 14-NH      | 7.98,s              |                     | 11,13,15,16                     |                |
| 1'-NH      | 10.90,d,(2.4)       |                     | 2',4',9'                        |                |
| 10'-NH     | 8.16,s              |                     | 13',15'                         |                |



## Supplementary Methods

### General materials and methods

*Escherichia coli* and *Streptomyces* strains were cultivated and manipulated according to the standard methods<sup>5,6</sup>. Strains and plasmids used in this study are listed in Supplementary Table 7. *S. sp.* CMB-MQ030 and *S. lividans* were cultivated on the MS agar (agar 2 g, mannitol 2 g, soya flour 2 g in 100 mL tap water) for sporulation or tryptic soy broth (TSB) for growth. DNA isolation and manipulation in *E. coli* were followed with standard methods<sup>5</sup>. Primer synthesis and DNA sequencing were performed at Genewiz Biotech Co., Ltd. (China). Restriction enzymes and DNA polymerases (Taq and PrimeSTAR) were purchased from Takara Biotechnology Co., Ltd. (China). All chemicals and reagents were purchased from Santa Cruz Biotechnology, Inc. (USA) or Shanghai Sangon Biotech (China) Co., Ltd. unless noted otherwise. Orfs were identified using the FramePlot 4.0 beta program (<http://nocardia.nih.gov/jp/fp4/>) and BLAST methods (<http://blast.ncbi.nlm.nih.gov/Blast.cgi>).

### Heterologous expression of the NAS gene cluster

Primers 5'- AATTTTCATATGGCCTTGCTGTCCCACTCCTCTCC - 3' and 5' - TTTGAATTCCTGCCGGCCTCCACACATACG - 3' (restriction sites of *NdeI* and *EcoRI* are underlined), 5'- AATTTTCATATGCGTCCACAACCGAGCAGAGCC-3' and 5'- TTTGAATTCGTCCTCGGCTATCACAACCCG -3' (restriction sites of *NdeI* and *EcoRI* are underlined) were used to amplify Cluster1-*cdps-p450* and Cluster2-*cdps-p450* respectively from the *S. sp.* CMB-MQ030. The resulting DNA fragments were cloned into pMD18-T. After confirmed by DNA sequencing, the two fragments were released by *NdeI-EcoRI* digestion, subsequently transferred into the *NdeI-EcoRI* site of pIB139 to generate pWHU2482 and pWHU2483. Then these plasmids and the pIB139 (serves as a control) were transformed into *E. coli* ET12567/pUZ8002 and conjugated into *S. albus* J1074, *S. lividans* TK24 and *S. coelicolor* M1154 to individually generate the recombinant strains mWHU2475-2483 following the standard conjugation procedure<sup>6</sup>. Briefly, the donor strain, *E. coli* ET12567/pUZ8002 harboring the plasmid, was prepared by growth to an OD<sub>600</sub> of 0.4 - 0.6, and then the cell was washed twice and resuspended in LB medium with a concentration of ca.  $5 \times 10^9$  cells per mL. Spores of the recipient *Streptomyces* were heat-shocked for 10 min at 50 °C and then resuspended in 500  $\mu$ L TSB for a 3 h incubation at 37 °C. They were further resuspended in LB medium at a concentration of ca.  $1 \times 10^9$  as the recipient. Each 100  $\mu$ L donor and 100  $\mu$ L recipient were mixed

and spread on mannitol soya flour (MS) medium plates and grown for 15 - 18 h at 30 °C. The plates were washed with sterilized water and then covered with antibiotics (50 µg mL<sup>-1</sup> apramycin and 50 µg mL<sup>-1</sup> nalidixic acid). The plates were incubated at 30 °C until exconjugants appear. Colonies of exconjugants were selected into TSB medium with 50 µg mL<sup>-1</sup> apramycin. Their integration into the genome of recipient strain was confirmed by PCR using the same primers for cloning Cluster1-*cdps-p450* and Cluster2-*cdps-p450*.

### **Fermentation and metabolites profile analysis.**

Wide type and recombinant strains were cultured in media MS agar for 7 days. After fermentation, the MS agar was extracted with the equal volume ethyl acetate under sonication for 20 min. Organic phase was transferred and dried by vacuum at low temperature. Metabolites were subsequently re-dissolved by 1 mL methanol and filtrated by a 0.45 µm membrane to remove particles before HPLC or HPLC-MS analysis. HPLC analysis was carried out on a SHIMADZU LC-20A Prominence HPLC system. HPLC-MS analysis was carried out on a Thermo Instruments HPLC system connected to LCQ Fleet electrospray ionization (ESI) mass spectrometer (ThermoFisher Scientific Inc.). HPLC-ESI-high resolution MS (HPLC-ESI-HRMS) analysis was carried out on ESI-LTQ Orbitrap (ThermoFisher Scientific Inc.). HPLC and HPLC-MS analysis of metabolites were performed on a column of Diamonsil (C18, 5 µm, 250 × 4.6 mm, Dikma Technologies Inc.) at a flow rate of 1 mL min<sup>-1</sup> and a PDA detector under 254 nm, over a 40 min gradient program with water (eluent A) and acetonitrile (eluent B): T = 0 min, 5% B; T = 30min, 100% B; T = 33 min, 100% B; T = 34 min, 5% B; T= 40 min, 5% B.

### **Cloning, expression and purification of P450 and associated proteins**

The DNA sequences of NascB (cluster1-p450) and cluster2-*p450* gene were optimized based on *E. coli*-bias and synthesized (GENEWIZ Co. Ltd.). The two DNA fragments were released by *Nde*I-*Xho*I digestion, subsequently transferred into the same sites of pET28a to generate pWHU2484 and pWHU2485. These resulted plasmids were transferred into *E. coli* BL21 (DE3) for protein expression. After expression at 16 °C and 220 rpm for 20 h under 100 µM isopropyl-β-D-thiogalactopyranoside (IPTG) induction (IPTG was added when OD<sub>600</sub> reaches ~0.6), cells of 500 mL culture were then harvested by centrifugation at 2000 g at 4 °C. The cell pellet was resuspended in 20 mL lysis buffer (25 mM HEPES, pH 7.5, 300 mM NaCl, 5 mM imidazole, 10% glycerol). The cells were lysed by ultrasonication, and the insoluble debris was removed by centrifugation 1 h at 10,000 g, 4°C. The

protein supernatant was then incubated with 1 mL Ni-NTA sepharose for 1.5 hours with slow, constant rotation at 4 °C. Subsequently, the protein resin mixtures were loaded into a gravity flow column, and proteins were eluted with increasing concentrations of imidazole (25 mM, 50 mM, 100 mM, 300 mM) in Buffer A (25 mM HEPES, pH 7.5, 300 mM NaCl, 10% glycerol). Purified proteins were then loaded into PD-10 desalting columns and desalted using buffer B (25 mM HEPES, pH 7.5, 50 mM NaCl, 10% glycerol) and concentrated by centrifugation using an Amicon Ultra-4 (GE Healthcare). The purified proteins were evaluated by 12% acrylamide SDS-PAGE (Supplementary Fig. 11). We didn't obtain the soluble protein of Cluster2-P450. We obtained the soluble protein of cluster1-p450. Proteins concentration was determined by the Bradford method using a BSA calibration curve. The purified proteins were stored at -80 °C and used for in vitro assays.

The sequences of the ferredoxin/ferredoxin reductase from Spinach were optimized based on *E. coli* codon-bias and synthesized (GENEWIZ Co. Ltd.; sequences see below). These genes were tried in many expression ways and the best results are infused with TRX- (thioredoxin) and MBP- tag respectively. For constructing the expression vector, synthetic ferredoxin gene fragment was released by *EcoRI-HindIII* digestion, and cloned into the same sites of pSJ5 to generate the plasmid pTRX-Fd. Similarly, the synthetic ferredoxin reductase gene fragment was released by *EcoRI-HindIII* digestion, and cloned into the same sites of pSJ8 to generate the plasmid pMBP-FdR. These resulted plasmids were transferred into *E. coli* BL21 (DE3) for protein expression at 25 °C. Following the similar procedure, these proteins were expressed, purified and used for in vitro assays (12% acrylamide SDS-PAGE analysis, Supplementary Fig. 11).

Synthetic Spinach ferredoxin sequence (restriction sites are underlined):

GAATTCGCCGCCTACAAGGTGACCCTGGTGACCCCGACCGGCAACGTGGAGTT  
 CCAGTGCCCGGACGACGTGTACATCCTGGACGCCGAGAAGAAGAGGGGATCG  
 ACCTGCCGTACAGCTGTGCGCAGGCAGTTGCAGCAGCTGCGCAGGTAAGCTG  
 AAAACCGGCAGCCTGAACCAGGACGACCAGAGCTTCCTGGACGACGACCAGAT  
 CGACGAGGGCTGGGTTCTGACATGCGCCGCTACCCGGTGAGCGATGTGACCA  
 TCGAGACCCACAAAGAAGAGGAGCTGACCGCCTAAAAGCTT

Synthetic Spinach ferredoxin reductase sequence (restriction sites are underlined):

GAATTCCAGATCGCCTCTGATGTGGAGGCACCTCCACCTGCTCCTGCTAAGGTA  
 GAGAAACATTCAAAGAAAATGGAGGAAGGCATTACAGTTAACAAGTTTAAGCCTA  
 AGAcCCCTTACGTTGGAAGATGTCTTCTTAACACCAAATTACTGGGGATGATGC  
 ACCCGGAGAGACCTGGCACATGGTTTTTTCCCATGAAGGAGAGATCCCTTACAG  
 AGAAGGGCAATCCGTTGGGGTTATTCCAGATGGGGAAGACAAGAATGGAAAGCC

CCATAAGTTGAGATTGACTCGATCGCCAGCAGTGCTCTTGGTGATTTTGGTGAT  
GCTAAATCTGTTTCGTTGTGTGTGAAAACGACTCATCTACACCAATGACGCTGGAG  
AGACGATCAAGGGAGTCTGCTCCAACCTTCTTGTGTGACTTGAAACCCGGTGCTG  
AAGTGAAGTTAACAGGACCAGTTGGAAAGGAGATGCTCATGCCCAAAGACCCTA  
ACGCGACAATTATCATGCTTGGAAGTGGAACTGGGATTGCTCCTTTCCGTTTCATT  
CTTGTGGAAGATGTTCTTCGAAAAGCATGATGATTACAAGTTTAAACGGCTTGGCT  
TGGCTTTTCTTGGGTGTACCCACAAGCAGTTCTCTTCTCTACAAAGAGGAATTTG  
AGAAGATGAAGGAAAAGGCTCCAGACAACCTCAGGCTGGATTTTGCAGTGAGCA  
GAGAGCAAATAACGAGAAAAGGGGAGAAGATGTACATTCAAACCCGAATGGCAC  
AATACGCAGTTGAGCTATGGGAAATGTTGAAGAAAGATAATACTTATTTCTACATGT  
GTGGTCTCAAGGGAATGGAAAAGGGAATTGACGACATTATGGTTTCATTGGCTGC  
TGCAGAAGGCATTGATTGGATTGAATACAAGAGGCAGTTGAAGAAGGCAGAACA  
ATGGAACGTTGAAGTCTACTAAGCTT.

Ferredoxin reductase (accession numbers: AGI90801, AGI87112, AGI88862, AGI91094) and ferredoxin (accession numbers: AGI91495, AGI88059, AGI92011) from *S. albus* J1074 were cloned into pETDuet-1 for co-expression. Briefly, saFdR1 (AGI90801), saFdR2 (AGI87112), saFdR3 (AGI88862) and saFdR4 (AGI91094) were individually amplified by primers saFdR1-F/R, saFdR2-F/R, saFdR3-F/R and saFdR4-F/R (Supplementary Table 8) from the *S. albus*. These fragments were digested by *NdeI-XhoI* and cloned into the same sites of pETDuet-1 to yield plasmid pETDuet-saFdR1 to pETDuet-saFdR4. saFd1 (AGI91495), saFd2 (AGI88059) and saFd3 (AGI92011) were individually amplified by primers saFd1-F/R, saFd2-F/R and saFd3-F/R (Supplementary Table 8) from the *S. albus*. These fragments were further digested by *BamHI-HindIII* and individually cloned into above plasmids pETDuet-saFdR1-4 to generate the plasmids from 12 combinations, including pETDuet-saFdR1-Fd1, pETDuet-saFdR1-Fd2, pETDuet-saFdR1-Fd3, pETDuet-saFdR2-Fd1, pETDuet-saFdR2-Fd2, pETDuet-saFdR2-Fd3, pETDuet-saFdR3-Fd1, pETDuet-saFdR3-Fd2, pETDuet-saFdR3-Fd3, pETDuet-saFdR4-Fd1, pETDuet-saFdR4-Fd2, pETDuet-saFdR4-Fd3. These expression plasmids were further used for whole-cell biocatalysis.

### Computational Methods

The calculations were performed using unrestricted density functional theory (UDFT) with the hybrid functional B3LYP<sup>7-9</sup> as implemented in the Jaguar 8.8 package<sup>10</sup>. Geometry optimizations were carried out with the LACVP\*\*+ basis set<sup>11</sup>. Based on the optimized geometries, more accurate energies were obtained by performing single point calculations with a larger basis set, i.e., cc-pVTZ(-f)+ for all the atoms. Since the

reactions take place inside enzymes, therefore, the effects of the biological protein environment on the calculated energies were estimated by performing single point calculations on the optimized structures using the self-consistent reaction field (SCRF) method with a Poisson-Boltzmann solver<sup>12,13</sup> and a dielectric constant ( $\epsilon$ ) of 4 which is a standard value that has been used in the modeling of enzymes<sup>14-16</sup>. By means of the Gaussian 09 program package<sup>17</sup>, frequency calculations were performed at the same theory level as the optimizations to confirm the nature of the stationary points and to obtain entropy effects. Dispersion effects were calculated using the empirical formula by Grimme et al. (i.e., DFT-D3)<sup>18-21</sup>. The energies reported in the paper are the free energies corrected for solvation, dispersion, and entropy effects.

### **Construction of GB05-dir-T7**

Primers T7-F (5'-ATGACCATGATTACGGATTCACTGGCCGTCGTGGCCCGCTCCGGATTTACTAACTGGAAGAGGC-3') and T7-R (5'-GCACTCCACCGCTGATGACATGTATATCTCCTTTTACGCGAACGCGAAGTCCGAC-3') were used to amplify the T7 RNA Polymerase gene fragment from *E.coli* BL21 (DE3). Primers Am-F (5'-GTCGGACTTCGCGTTCGCGTAAAAGGAGATATACATGTCATCAGCGGTGGA GTGC-3') and Am-R (5'-GCCATCAAAAATAATTCGCGTCTGGCCTTCCTGTAGCC ATCAGCCAATCGACTGGCGAGCGGC-3') were used to amplify the *aac (3)IV* gene fragment coding aminoglycoside 3-N-acetyltransferase (Am) from plasmid pIB139. Then their forward primer T7-F and reverse primer Am-R were used to overlapping PCR to generate the T7-Am fusion fragment. The overlap fragment was transferred into *E. coli* GB05-dir for PCR-targeting to incorporate the T7-Am cassette into the *lacZ*. Primers T7-For and Am-Rev were used to screen out the correct mutant strain which was named as GB05-dir-T7.

### **Construction of the whole cell catalysis system**

In order to co-express NascB with partner proteins of *Spinach*, NascB gene fragment was released by *NdeI-XhoI* digestion from pWHU2484, and subsequently transferred into the *NdeI-XhoI* site of pET21a to generate pWHU2486. Because pTRX-Fd contains internal *NdeI* and *NcoI* sites in the multi-cloning site which are required to be moved before cloning into pRSF-Duet. Primer pairs of 5'-TT TTTTCCATGGGAAGCGATAAAATTATTCACGTG-3', 5'-GCCAGAACCAGAACCGG CCAGG-3' and 5'-TGGCCGGTTCTGGTTCTGGCTCCCACCATCACCATCACCA-3', 5'-TTTTTTAAGCTTTAGGCGGTCAGCTCCTC-3' (*NcoI* and *HindIII* sites are underlined) were used to amplify the TRX tag and Fd fragments from the pTRX-Fd respectively. These two fragments were fused by overlapping PCR using their

forward and reverse primers. This TRX-Fd fragment was further digested by *NcoI-HindIII* and cloned into the same site of pRSF-Duet. Similarly, MBP-FdR fragment was released by *NdeI-XhoI* digestion from the plasmid pMBP-FdR and subsequently transferred into the *NdeI-XhoI* site of above pRSF-Duet-TRX-Fd plasmid to generate pWHU2487. Both of pWHU2486 and pWHU2487 were transferred into *E. coli* GB05-dir-T7 and other strains for biocatalysis.

In order to co-express NascB with partner proteins of *S. albus*. NascB was released by *NdeI-XhoI* digestion from pWHU2484, and cloned into the same sites of pRSF-Duet to generate pWHU2488. This plasmid together with each plasmid containing Fd-FdR from *S. albus* was transferred into *E. coli* GB05-dir-T7. And total 12 recombinant strains were obtained for biocatalysis.

In order to co-express glucose dehydrogenase (GDH) with NascB, NascB gene fragment was released by *NdeI-XhoI* digestion from pWHU2484, and subsequently transferred into the *NdeI-XhoI* site of pET-Duet. GDH (accession number: ABL29718) was synthesized and cloned into *EcoRI-HindIII* sites of above pET-Duet-NascB plasmid to generate pWHU2489. Both of pWHU2487 and pWHU2489 were transferred into *E. coli* GB05-dir-T7 for biocatalysis.

### **Scaled biocatalytic reaction and purification of compounds NAS1-30**

Recombinant strain was inoculated in LB medium (5 L) by growth to an OD<sub>600</sub> of 0.8-1.0 at 37 °C. After expression at 18 °C 220 rpm for 20 h under 100 μM isopropyl-β-D-thiogalactopyranoside (IPTG), 400 μM δ-aminolevulinic acid (ALA) and 200 μM (NH<sub>4</sub>)<sub>2</sub>Fe(SO<sub>4</sub>)<sub>2</sub>·6H<sub>2</sub>O induction (they were added when OD<sub>600</sub> reaches 0.8-1.0), cells of 5 L culture were harvested by centrifugation at 2,000 g at 4 °C and were washed twice and resuspended in 200 mL M9 medium. Then 100 mM cyclodipeptide substrates (1 mL) were added in the M9 medium. After 48 h incubation at 18 °C, the reaction mixture was extracted with 400 mL of ethyl acetate three times. Organic phase was transferred and dried by vacuum at low temperature. Metabolites were subsequently redissolved by methanol with the right amount of DMSO and filtrated by a 0.45 μm membrane to remove particles. Compounds **NAS-1-30** were semi-prepared on a SHIMADZU LC-20A Prominence HPLC system using Venusil MP C18(2) (5 μm, 250 × 10 mm, Agela Technologies Inc.) at a flow rate of 3 mL min<sup>-1</sup>.

### **Synthesis and Identification of cyclodipeptide substrate**

Reagents were purchased from commercial suppliers and used without further purification unless otherwise noted. NMR spectra were recorded on Bruker Avance 400 MHz spectrometer. Chemical shifts values are given in ppm and referred to the

internal standard of TMS (tetramethylsilane). The peak patterns are indicated as follows: s, singlet; d, doublet; t, triplet; q, quadruplet; m, multiplet and dd, doublet of doublets. The coupling constants (J) are reported in hertz (Hz). Silica gel column chromatography was performed over silica gel 200–300 mesh, and the eluent was a mixture of ethyl acetate and petroleum ether, or a mixture of Methanol and dichloromethane.

Compounds **s1-s11** were synthesized according to known literature procedures<sup>22</sup>.

**Cyclo-L-Trp-L-Gly (s1)** Prepared from L-tryptophan methyl ester hydrochloride and N-Boc-L-Leu according to General Procedure (I) on 0.23 mmol scale to afford **s1** as a white solid (74.8 mg, 86% yield). <sup>1</sup>H NMR (400 MHz, DMSO): 10.97 (s, 1H), 8.11 (d, J = 34.6 Hz, 1H), 7.81 (s, 1H), 7.56 (d, J = 7.8 Hz, 1H), 7.32 (t, J = 12.9 Hz, 1H), 7.08 (s, 1H), 7.05 (d, J = 7.8 Hz, 1H), 6.97 (t, J = 7.3 Hz, 1H), 4.03 (s, 1H), 3.31 (d, J = 18.5 Hz, 1H), 3.29 – 3.22 (m, 1H), 3.02 (dd, J = 14.4, 4.1 Hz, 1H), 2.78 (d, J = 17.2 Hz, 1H).

**Cyclo-L-Trp-L-Ala (s2)** Prepared from L-tryptophan methyl ester hydrochloride and N-Boc-L-Leu according to General Procedure (I) on 0.23 mmol scale to afford **s2** as a white solid (56.3 mg, 82% yield). <sup>1</sup>H NMR (400 MHz, DMSO): 10.72 (s, 1H), 7.92 – 7.77 (m, 1H), 7.73 (t, J = 14.0 Hz, 1H), 7.47 – 7.22 (m, 1H), 7.06 (t, J = 11.9 Hz, 1H), 6.81 (d, J = 2.2 Hz, 1H), 6.80 – 6.77 (m, 1H), 6.73 – 6.68 (m, 1H), 3.88 (s, 1H), 3.35 (q, J = 6.7 Hz, 1H), 3.01 (dd, J = 14.4, 4.0 Hz, 1H), 2.77 (dd, J = 14.4, 4.5 Hz, 1H), 0.15 (t, J = 7.0 Hz, 1H). <sup>13</sup>C NMR (100MHz, DMSO): 167.70, 166.72, 135.75, 127.76, 124.55, 120.76, 118.95, 118.34, 111.08, 108.40, 55.37, 49.74, 28.81, 19.53.

**Cyclo-L-Trp-L-Val (s3)** Prepared from L-tryptophan methyl ester hydrochloride and N-Boc-L-Leu according to General Procedure (I) on 0.23 mmol scale to afford **s3** as a white solid (58 mg, 84% yield). <sup>1</sup>H NMR (400 MHz, DMSO): 10.87 (d, J = 1.4 Hz, 1H), 8.08 (t, J = 14.9 Hz, 1H), 7.90 (dd, J = 21.0, 11.6 Hz, 1H), 7.61 (d, J = 7.9 Hz, 1H), 7.27 (dd, J = 19.3, 4.7 Hz, 1H), 7.06 (d, J = 2.3 Hz, 1H), 7.05 – 6.99 (m, 1H), 6.96 – 6.91 (m, 1H), 6.91 – 6.90 (m, 1H), 4.22 – 4.06 (m, 1H), 3.57 – 3.45 (m, 1H), 3.26 (dd, J = 14.4, 4.4 Hz, 1H), 3.03 (dt, J = 16.6, 8.3 Hz, 1H), 0.49 (d, J = 7.1 Hz, 1H), 0.45 (dd, J = 10.5, 4.8 Hz, 1H). <sup>13</sup>C NMR (100MHz, DMSO): 167.15, 166.20, 135.95, 127.97, 124.58, 120.58, 118.96, 118.16, 110.92, 108.71, 58.84, 55.14, 28.39, 22.77, 14.40, 11.60.

**Cyclo-L-Trp-L-Pro (s4)** Prepared from L-tryptophan methyl ester hydrochloride and N-Boc-L-Leu according to General Procedure (I) on 0.23 mmol scale to afford **s4** as a white solid (58.3 mg, 85% yield). <sup>1</sup>H NMR (400 MHz, CDCl<sub>3</sub>): 8.38 (s, 1H), 7.54 (dd, J = 8.1, 1.3 Hz, 1H), 7.33-7.24 (m, 1H), 7.12 (ddd, J = 8.2, 7.0, 1.2 Hz, 1H), 7.05 (ddd, 1H), 6.95 (d, 1H), 6.24 (d, 1H), 4.16 (dt, 1H), 3.47 (m, 1H), 3.34 (dd, 1H), 3.10 (m, 2H), 2.73 (dd, 1H), 2.00 (m, 1H), 1.77(m, 1H), 1.60(m, 1H), 1.36 (m, 1H).

**Cyclo-L-Trp-L-Phe (s5)** Prepared from L-tryptophan methyl ester hydrochloride and N-Boc-L-Leu according to General Procedure (I) on 0.23 mmol scale to afford **s5** as a white solid (56 mg, 80% yield). <sup>1</sup>H NMR (400 MHz, DMSO): 10.95 (d, J = 1.5 Hz, 1H), 7.99 (d, J = 2.3 Hz, 1H), 7.78 (d, J = 2.4 Hz, 1H), 7.52 (d, J = 7.9 Hz, 1H), 7.34 (t, J = 9.4 Hz, 1H), 7.22 – 7.16 (m, 3H), 7.13 – 7.07 (m, 1H), 7.04 – 7.01 (m, 1H), 6.99 (d, J = 2.2 Hz, 1H), 6.72 (d, J = 2.0 Hz, 1H), 6.70 (d, J = 1.4 Hz, 1H), 4.01 (s, 1H), 3.88 (t, J = 6.8 Hz, 1H), 2.83 (dd, J = 14.4, 4.3 Hz, 1H), 2.57 (d, J = 5.8 Hz, 1H), 2.54 – 2.48 (m, 1H), 2.46 (d, J = 4.6 Hz, 1H), 1.84 (dd, J = 13.4, 7.1 Hz, 1H).

**Cyclo-L-Trp-L-Leu (s6)** Prepared from L-tryptophan methyl ester hydrochloride and N-Boc-L-Leu according to General Procedure (I) on 0.23 mmol scale to afford **s6** as a white solid (58.3 mg, 85% yield). <sup>1</sup>H NMR (400 MHz, DMSO): 10.96 (s, 1H), 8.12 (s, 1H), 7.98 (s, 1H), 7.55 (d, J=7.8 Hz, 1H), 7.29 (d, J= 8.1 Hz, 1H), 7.02 (t, 1H), 6.91 (t, 1H), 4.09 (m, 1H), 3.26 (dd, J= 14.4, 3.7 Hz, 1H), 2.97 (dd, J=14.3, 9.6 Hz, 1H), 1.17 (m, 1H), 0.88 (m, 1H), 0.61 (m, 2H), 0.51 (d, J= 6.7 Hz, 3H), 0.40 (d, J= 6.6 Hz, 3H).

**Cyclo-L-Trp-L-Ile (s7)** Prepared from L-tryptophan methyl ester hydrochloride and N-Boc-L-Ile according to *General Procedure (I)* on 0.23 mmol scale to afford **s7** as a white solid (56.3 mg, 82% yield). <sup>1</sup>H NMR (400 MHz, DMSO): 10.85 (s, 1H), 8.02 (s, 1H), 7.89 (s, 1H), 7.60 (d, J = 7.9 Hz, 1H), 7.28 (d, J = 8.0 Hz, 1H), 7.07 (d, J = 2.3 Hz, 1H), 7.05 – 6.98 (m, 1H), 6.97 – 6.90 (m, 1H), 4.17 – 4.11 (m, 1H), 3.53 – 3.45 (m, 1H), 3.21 (dd, J = 14.4, 4.9 Hz, 1H), 3.06 (dd, J = 14.4, 4.5 Hz, 1H), 1.70 – 1.57 (m, 1H), 0.59 (d, J = 7.1 Hz, 3H), 0.14 (d, J = 6.8 Hz, 3H).

**Cyclo-L-Trp-L-Met (s8)** Prepared from L-tryptophan methyl ester hydrochloride and N-Boc-L-Met according to *General Procedure (I)* on 0.23 mmol scale to afford **s8** as a white solid (62.9 mg, 85% yield). <sup>1</sup>H NMR (400 MHz, DMSO): 10.92 (s, 1H), 8.22 (s, 1H), 8.01 (s, 1H), 7.61 (d, J = 8.1 Hz, 1H), 7.30 (d, J = 7.9 Hz, 1H), 7.03 (m, 2H), 6.93 (m, 1H), 4.15 (s, 1H), 3.68 (t, 1H), 3.29 (dd, J = 14.3, 3.6 Hz, 1H), 2.99 (dd, J = 14.3, 4.6



Hz, 1H), 1.74 (s,3H), 1.61 (m, 2H), 1.21 (m,1H), 0.92 (m,1H); <sup>13</sup>C NMR (100MHz, DMSO) δ 167.43, 166.83, 136.29, 128.28, 125.13, 121.14, 119.49, 118.77, 111.71, 108.86, 55.82, 53.45, 33.17, 31.17, 29.23, 28.08.

**Cyclo-L-Trp-L-Trp (s9)** Prepared from L-tryptophan methyl ester hydrochloride and N-Boc-L-Tryptophan according to *General Procedure (I)* on 0.23 mmol scale to afford **s9** as a white solid (74.8 mg, 86% yield). <sup>1</sup>H-NMR(400MHz, DMSO) : 10.87 (s,2H), 7.75 (s,2H), 7.33 (d, *J* = 7.8 Hz, 2H), 7.31 (d, *J* = 8.0 Hz, 2H), 7.04 (t, 2H), 6.98 (t, 2H), 6.61 (s,2H), 3.89 (s,2H), 2.72 (dd, *J* = 14.2, 3.8 Hz, 2H), 2.20 (dd, *J* = 14.2, 6.6 Hz, 2H); <sup>13</sup>C-NMR (100 MHz, DMSO): 167.28, 136.51, 127.81, 124.84, 121.36, 118.62, 111.66, 109.20, 55.61, 30.32.

**Cyclo-L-Trp-L-Gln (s10)** Prepared from L-tryptophan methyl ester hydrochloride and N-Boc-L-Gln according to *General Procedure (I)* on 0.23 mmol scale to afford **s10** as a white solid (57.3 mg, 78% yield). <sup>1</sup>H-NMR (400 MHz, DMSO) : 10.84 (s,1H), 7.99 (s,1H), 7.88 (s,1H), 7.48 (d, *J* = 7.9 Hz, 1H), 7.21 (d, *J* = 8.0 Hz, 1H), 6.99 (d, *J* = 2.3 Hz, 1H), 6.94 (t, 1H), 6.86 (t, 1H), 6.69 (s, 1H), 6.61 (s, 1H), 4.02 (brs, 1H), 3.54 (brs, 1H), 3.11 (dd, *J* = 14.4, 4.7 Hz, 1H), 2.96 (dd, *J* = 14.5, 4.5 Hz, 1H), 1.40 (m, 2H), 1.25 (m, 1H), 0.95 (m, 1H); <sup>13</sup>C-NMR (100 MHz, DMSO): 173.49, 167.29, 166.79, 135.79, 127.65, 124.52, 120.65, 113.76, 113.26, 111.04, 108.65, 55.13, 53.19, 29.63, 29.66, 28.97.

**Cyclo-L-Trp-L-Asn (s11)** Prepared from L-tryptophan methyl ester hydrochloride and N-Boc-L-Asn according to *General Procedure (I)* on 0.23 mmol scale to afford **s11** as a white solid (56 mg, 80% yield). <sup>1</sup>H-NMR (400 MHz, DMSO): 10.93 (s, 1H), 7.97 (s, 1H), 7.69 (s, 1H), 7.57 (d, *J* = 7.9 Hz, 1H), 7.34 (d, *J* = 7.9 Hz, 1H), 7.12 (s, 1H), 7.05 (t, 1H), 6.96 (d, *J* = 7.8 Hz, 1H), 6.92 (m, 2H), 4.13 (brs, 1H), 3.99 (brs, 1H), 3.20 (dd, *J* = 14.5, 5.5 Hz, 1H), 3.10 (dd, *J* = 14.5, 4.4 Hz, 1H), 2.16 (dd, *J* = 15.6, 4.4 Hz, 1H), 1.47 (dd, *J* = 15.6, 8.3 Hz, 1H); <sup>13</sup>C-NMR (100 MHz, DMSO): 171.80, 167.82, 167.33, 136.34, 128.12, 124.86, 121.19, 119.23, 118.74, 111.53, 109.09, 55.61, 51.70, 38.36, 29.04.

Compounds **s12-s16** & **s21-s30** were synthesized as below: To a solution of amino acid methyl ester hydrochloride (1.0 equiv) in CH<sub>2</sub>Cl<sub>2</sub> (0.1 M) at 0 °C was added Et<sub>3</sub>N (4.5 equiv) dropwise. HOBt•H<sub>2</sub>O (1.5 equiv) and N-Boc-L-tryptophan (1.5 equiv) were sequentially added and stirred vigorously. Once homogenous, EDC•HCl (1.5 equiv) was added in a single portion and the solution allowed to warm to 23 °C. The reaction was stirred for 15 hours, at which time it was quenched by the addition of 1N HCl, and the aqueous layer extracted with CH<sub>2</sub>Cl<sub>2</sub> (2 x). The combined organics were then

washed with saturated aqueous NaHCO<sub>3</sub>, and the aqueous layer back extracted with CH<sub>2</sub>Cl<sub>2</sub> (2 x). The organics were pooled, then dried over Na<sub>2</sub>SO<sub>4</sub>, filtered, and concentrated in vacuo. The resulting oil/ foam was subsequently dissolved in CH<sub>2</sub>Cl<sub>2</sub> (0.2 M), and cooled to 0 °C. TFA (1.5 mL / 5 mL CH<sub>2</sub>Cl<sub>2</sub>) was added dropwise, then the solution was warmed to 23 °C and stirred for 2 h. The mixture was concentrated in vacuo and the resulting viscous residue dissolved in methanol (0.25 M), and cooled to 0 °C. Ammonium hydroxide ( 28–30% in H<sub>2</sub>O, 1 mL / 6 mL MeOH) was then added dropwise and the reaction mixture allowed to warm to 23 °C and stirred for 24 h. The resulting suspension was cooled to 0 °C, and the fine white precipitate was filtered and rinsed with cold methanol.

**Cyclo-L-Trp-L-Ser (s12)** Prepared from L-Serine methyl ester hydrochloride (0.32 mmol) and N-Boc-L-tryptophan according to afford **s12** as a white solid (68.7 mg, 78% yield). <sup>1</sup>H NMR (400 MHz, DMSO): 10.94 (s, 1H), 7.93 (m, 2H), 7.53 (d, *J* = 7.9 Hz, 1H), 7.32 (d, *J* = 8.1 Hz, 1H), 7.11 (d, *J* = 2.3 Hz, 1H), 7.04 (m, 1H), 6.96 (m, 1H), 4.98 (t, 1H), 4.00 (t, 1H), 3.69 (m, 1H), 3.30 (m, 1H), 3.17 (t, 2H), 3.02 (m, 1H); <sup>13</sup>C NMR (100 MHz, DMSO) δ 167.27, 165.76, 135.96, 127.59, 124.14, 120.77, 118.57, 118.29, 111.21, 109.05, 62.93, 57.24, 55.47, 48.56, 30.38.

**Cyclo-L-Trp-L-Thr (s13)** Prepared from L-Thr methyl ester hydrochloride (50 mg) and N-Boc-L-tryptophan to afford **s13** as a white solid (70.5 mg, 83% yield). <sup>1</sup>H NMR (400 MHz, DMSO): 10.91 (s, 1H), 8.08 (s, 1H), 7.82 (s, 1H), 7.54 (d, 1H), 7.33 (d, *J* = 8.0 Hz, 1H), 7.16 (d, *J* = 2.3 Hz, 1H), 7.06 (m, 1H), 6.96 (m, 1H), 5.04 (d, *J* = 5.9 Hz, 1H), 3.91 (m, 1H), 3.76 (m, 1H), 3.52 (t, 1H), 3.19 (m, 2H), 0.94 (d, *J* = 6.6 Hz, 3H); <sup>13</sup>C NMR (100 MHz, DMSO): 167.89, 166.46, 136.13, 127.59, 123.99, 120.74, 118.50, 118.23, 111.22, 109.65, 67.13, 60.35, 55.75, 31.17, 19.65.

**Cyclo-L-Trp-L-Cys (s14)** Prepared from L-Cysteine methyl ester hydrochloride (50 mg) and N-Boc-L-tryptophan to afford **s14** as a white solid (68.2 mg, 81% yield). <sup>1</sup>H-NMR(400 MHz, DMSO) : 10.94 (s, 1H), 8.28 (s, 1H), 7.99 (s, 1H), 7.53 (d, *J* = 7.9 Hz, 1H), 7.28 (d, *J* = 8.1 Hz, 1H), 7.00 (m, 3H), 6.94 (t, 1H), 4.14 (brs, 1H), 3.71 (brs, 1H), 3.24 (dd, *J* = 19.8, 5.4 Hz, 1H), 3.04 (dd, *J* = 19.8, 5.4 Hz, 1H), 2.22 (dd, *J* = 13.4, 3.7 Hz, 1H), 1.21 (m, 1H); <sup>13</sup>C-NMR (100 MHz, DMSO): 167.07, 166.35, 135.12, 127.85, 124.83, 121.42, 119.26, 118.93, 111.41, 109.00, 56.03, 53.31, 41.92, 29.38.

**Cyclo-L-Trp-L-Tyr (s15)** Prepared from L-Tyr methyl ester hydrochloride (50 mg) and N-Boc-L-tryptophan to afford **s15** as a white solid (66.5 mg, 88% yield). <sup>1</sup>H-NMR (400 MHz, DMSO+D<sub>2</sub>O): 7.48 (d, *J* = 7.9 Hz, 1H), 7.32 (d, *J* = 8.1 Hz, 1H), 7.07 (t, 1H), 6.98 (t, 2H), 6.57 (d, *J* = 8.3 Hz, 2H), 6.44 (d, *J* = 8.3 Hz, 2H), 3.97 (t, 1H), 3.78 (t, 1H), 2.80 (dd, *J* = 14.4, 4.1 Hz, 1H), 2.42 (m, 2H), 1.58 (m, 1H); <sup>13</sup>C-NMR (100 MHz,

DMSO+D<sub>2</sub>O): 167.55, 167.08, 156.10, 136.51, 130.89(2C), 127.72, 126.63, 124.80, 121.54, 119.19, 119.09, 115.31, 111.81, 108.98, 56.13, 55.52, 30.17, 28.76.

**Cyclo-L-Trp-L-His (s16)** Prepared from Methyl L-Histidinate dihydrochloride (50 mg) and N-Boc-L-tryptophan to afford **s16** as a white solid (30.7 mg, 46% yield).

<sup>1</sup>H-NMR(400 MHz, DMSO) :11.93(s,1H), 9.52(s,1H), 9.15(s,1H), 8.69(s,1H), 8.41(d,  $J = 7.8$  Hz,1H), 8.20(d,  $J = 7.9$  Hz 1H), 7.94(m, 2H), 7.83 (t,1H), 6.57(s,1H), 4.96(s,1H), 4.58(m,1H), 4.10(s,1H), 4.08(s,1H), 3.81(d,  $J = 14.2$  Hz,1H), 3.12(d,  $J = 14.2$  Hz, 1H),1.75(t,1H); <sup>13</sup>C-NMR(100 MHz, DMSO):168.40, 136.94, 135.17, 129.32, 129.06, 125.27, 122.18, 120.62, 119.89, 118.07, 112.69, 109.86, 56.73, 54.20, 30.74, 30.17.

**Cyclo-7-F-L-Trp-L-Pro (s21)** Prepared from L-Pro methyl ester hydrochloride (50 mg) and N-Boc-6-F-L-tryptophan afford **s21** as a white solid (79.1 mg, 87% yield). <sup>1</sup>H-NMR

(400 MHz, DMSO): 11.25 (s,1H), 7.92 (s,1H), 7.58 (d,  $J = 7.8$  Hz, 1H), 7.27 (s,1H), 7.14 (d,  $J = 7.4$  Hz,1H), 6.99(t,1H), 4.34 (s,1H), 4.06 (t,1H), 3.35 (m,1H), 3.25 (m,1H), 3.15 (m,2H), 1.99 (s,1H), 1.66 (m,2H), 1.40 (m,1H); <sup>13</sup>C-NMR (100 MHz, DMSO):169.05, 165.36, 132.64, 129.42, 125.74, 120.33, 119.24, 117.90, 115.60, 110.77, 58.38, 55.13, 44.57, 27.70, 25.63, 21.83.

**Cyclo-5-Cl-L-Trp-L-Pro (s22)** Prepared from L-Pro methyl ester hydrochloride (50 mg) and N-Boc-4-Cl-L-tryptophan to afford **s22** as a white solid (76.5 mg, 80% yield).

<sup>1</sup>H-NMR (400 MHz, DMSO): 11.28 (s,1H), 7.61 (s,1H), 7.39 (s,1H), 7.34 (d,  $J = 7.9$  Hz,1H), 7.03 (m,2H), 4.37 (m,1H), 4.23 (t,1H), 3.79 (dd,  $J = 15.3, 3.9$  Hz, 1H), 2.96 (dd,  $J = 15.3, 8.4$  Hz,1H), 2.09 (m,1H), 1.92 (m,1H), 1.87 (m,1H); <sup>13</sup>C-NMR(100 MHz, DMSO):170.14, 166.88, 137.90, 126.18, 124.53, 123.5, 121.75, 119.24, 170.77, 109.90, 58.56, 55.36, 44.85, 27.31, 25.71, 22.52.

**Cyclo-6-Cl-L-Trp-L-Pro (s23)** Prepared from L-Pro methyl ester hydrochloride (50 mg) and N-Boc-5-Cl-L-tryptophan to afford **s23** as a white solid (77.5 mg, 81% yield).

<sup>1</sup>H-NMR(400 MHz, MeOD): 7.49 (s,1H), 7.20 (d,  $J = 8.6$  Hz,1H), 7.05 (s,1H), 6.95 (d,  $J = 10.5$  Hz,1H), 4.53 (s,1H), 4.29 (s,1H), 3.88 (m,1H), 3.37 (m,1H), 3.24 (m,1H), 3.12 (dd,  $J = 14.8, 4.4$  Hz, 1H), 1.87 (m,1H), 1.80 (m,1H), 1.49 (m,1H); <sup>13</sup>C-NMR(100 MHz, MeOD): 170.80, 167.30, 136.41, 130.07, 127.44, 125.72, 122.69, 119.09, 113.64, 110.35, 60.20, 57.20, 45.85, 29.07, 28.81, 22.11.

**Cyclo-7-Cl-L-Trp-L-Pro (s24)** Prepared from L-Pro methyl ester hydrochloride (50 mg) and N-Boc-6-Cl-L-tryptophan to afford **s24** as a white solid (81.4 mg, 85% yield).

<sup>1</sup>H-NMR (400 MHz, DMSO): 11.01 (s,1H), 7.89 (s,1H), 7.60 (d,  $J = 8.6$  Hz,1H), 7.37

(s,1H), 7.21 (s,1H), 7.01 (m,1H), 4.31 (s,1H), 4.06 (t,1H), 3.42 (s,0.5H), 3.36 (s,0.5H), 3.24 (m,1H), 3.16 (d,  $J = 14.8\text{Hz}$ ,1H), 3.10 (d,  $J = 9.7\text{Hz}$ ,1H), 1.97 (m,1H), 1.66 (m,1H), 1.33 (m,1H);  $^{13}\text{C-NMR}$ (100 MHz, DMSO): 169.38, 166.81, 136.74, 126.74, 126.06, 120.67, 119.01, 111.26, 110.13, 58.86, 55.70, 45.03, 28.24, 26.21, 22.27.

**Cyclo-8-Cl-L-Trp-L-Pro (s25)** Prepared from L-Pro methyl ester hydrochloride (50 mg) and N-Boc-7-Cl-L-tryptophan to afford **s25** as a white solid (74.7 mg, 78% yield).  $^1\text{H-NMR}$  (400 MHz, DMSO) : 11.02 (s,1H), 7.90 (s,1H), 7.60 (d,  $J = 8.4\text{ Hz}$ ,1H), 7.38 (s,1H), 7.21 (s,1H), 6.69 (d,  $J = 8.6\text{ Hz}$ , 1H), 4.31 (s,1H), 4.03 (s,1H), 3.18 (m,3H), 1.97 (m,1H), 1.65 (m,1H), 1.29 (m,1H);  $^{13}\text{C-NMR}$  (100 MHz, DMSO): 168.86, 165.32, 136.24, 126.23, 125.56, 120.17, 118.51, 110.77, 109.62, 58.36, 55.20, 44.52, 27.74, 25.72, 21.76.

**Cyclo-6-Br-L-Trp-L-Pro (s26)** Prepared from L-Pro methyl ester hydrochloride (50mg) and N-Boc-5-Br-L-tryptophan to afford **s26** as a white solid (74.1 mg, 68% yield).  $^1\text{H-NMR}$ (400 MHz, MeOD): 7.74 (s,1H), 7.25 (d,  $J = 3.9\text{ Hz}$ ,1H), 7.17 (m,1H), 7.13 (s,1H), 4.40 (m,1H), 3.99 (m,1H), 3.50 (m,1H), 3.34 (m,1H), 3.21 (m,1H), 1.96 (m,1H), 1.69 (m,1H), 1.49 (m,1H), 1.29 (m,1H);  $^{13}\text{C-NMR}$  (100MHz, MeOD): 170.52, 167.67, 136.50, 130.35, 127.24, 125.13, 122.58, 113.78, 113.02, 109.42, 59.64, 57.08, 45.72, 29.22, 28.47, 22.54.

**Cyclo-D-Trp-D-Pro (s27)** Prepared from D-Pro methyl ester hydrochloride (50 mg) and N-Boc -D-tryptophan to afford **s27** as a white solid (70.1 mg, 82% yield).  $^1\text{HNMR}$  (400 MHz,  $\text{CDCl}_3$ ): 8.25 (s, 1H), 7.52 (dt, 1H), 7.30 (m, 1H), 7.18 (m, 1H), 7.03 (m, 2H), 5.71 (s, 1H), 4.28 (m, 1H), 4.00 (m, 1H), 3.69 (m, 1H), 3.52 (m, 2H), 2.91 (m, 1H), 2.26 (m, 1H), 1.92 (m, 2H), 1.80 (m, 1H);  $^{13}\text{C NMR}$  (100 MHz,  $\text{CDCl}_3$ ): 169.66, 165.83, 136.97, 127.02, 123.64, 123.07, 120.29, 118.80, 111.86, 110.22, 59.53, 54.89, 45.72, 28.61, 27.15, 22.92.

**Cyclo-D-Trp-L-Pro (s28)** Prepared from L-Pro methyl ester hydrochloride (50 mg) and N-Boc-D-tryptophan to afford **s28** as a white solid (65.8 mg, 77% yield).  $^1\text{HNMR}$  (400 MHz,  $\text{CDCl}_3$ ): 8.38 (s, 1H), 7.54 (dd,  $J = 8.1, 1.3\text{ Hz}$ , 1H), 7.33-7.24 (m, 1H), 7.12 (ddd,  $J = 8.2, 7.0, 1.2\text{ Hz}$ , 1H), 7.05 (ddd, 1H), 6.95 (d, 1H), 6.24 (d, 1H), 4.16 (dt, 1H), 3.47 (m, 1H), 3.34 (dd, 1H), 3.10 (m, 2H), 2.73 (dd, 1H), 2.00 (m, 1H), 1.77(m, 1H), 1.60(m, 1H), 1.36 (m, 1H);  $^{13}\text{C NMR}$  (100 MHz,  $\text{CDCl}_3$ ): 169.86, 165.81, 136.48, 127.30, 124.51, 122.78, 120.16, 119.21, 111.55, 109.65, 58.67, 58.18, 45.39, 30.95, 29.25, 21.85

**Cyclo-L-Trp-D-Pro (s29)** Prepared from D-Pro methyl ester hydrochloride (50 mg) and N-Boc -L-tryptophan to afford **s29** as a white solid (64.1 mg, 75% yield).  $^1\text{HNMR}$  (400 MHz,  $\text{CDCl}_3$ ): 8.29 (s, 1H), 7.54 (ddt, 1H), 7.30 (m, 1H), 7.09 (m, 2H), 6.96 (m, 1H), 6.12 (d, 1H), 4.15 (m, 1H), 3.48 (m, 1H), 3.34 (m, 1H), 3.10 (m, 2H), 2.74 (m, 1H),

2.00 (m, 1H), 1.78 (m, 1H), 1.60 (m, 1H), 1.35 (m, 1H). <sup>13</sup>C NMR (101 MHz, CDCl<sub>3</sub>): 169.86, 165.81, 136.48, 127.30, 124.51, 122.78, 120.16, 119.21, 111.55, 109.65, 58.67, 58.18, 45.39, 30.95, 29.25, 21.85.

**Oxo-Cyclo-L-Trp-L-Pro (Oxo-cW<sub>L</sub>-P<sub>L</sub>, s30)** Prepared from L-Pro methyl ester hydrochloride (50 mg) and 3-(benzofuran-3-yl)-2-((tert-butoxycarbonyl)amino)propanoic acid (which was synthesized by using the known procedures<sup>23</sup>) to afford **s30** as a white solid (74.9 mg, 87% yield). <sup>1</sup>H-NMR(400 MHz, MeOD): 7.66(s, 1H), 7.62(m, 1H), 7.53(m, 1H), 7.37(t, 1H), 7.29(t, 1H), 4.29(t, 1H), 3.55(m, 1H), 3.38(m, 1H), 3.18(m, 2H), 3.06(m, 1H), 2.08(m, 1H), 1.89(s, 1H), 1.68(m, 1H), 1.52(m, 1H); <sup>13</sup>C NMR (100 MHz, MeOD) 169.57, 166.03, 155.32, 143.97, 127.29, 124.18, 122.50, 119.18, 114.45, 110.85, 57.88, 57.12, 44.77, 28.37, 27.40, 21.22.

**Procedure For the Synthesis of Compound Cyclo-L-Trp-L-Lys (s17).** Prepared from L-tryptophan methyl ester hydrochloride (50 mg) and N<sup>α</sup>-Boc-N<sup>ε</sup>-Cbz-L-Lysine according to General Procedure<sup>22</sup> to obtain Cyclo-L-Trp- N<sup>ε</sup>-Cbz-L-Lys, which was then dissolved in MeOH and Pd-C (10%) was added to the solution. The reaction mixture was stirred at room temperature for 30 min under H<sub>2</sub>. After which Pd-C was removed by filtration, and the solution was evaporated to get the white solid product (18 mg, 29% yield). <sup>1</sup>H-NMR (400 MHz, MeOD): 7.65 (d, 1H), 7.35 (d, 1H), 7.11 (t, 2H), 7.02 (t, 1H), 4.34 (m, 1H), 3.66 (m, 1H), 3.52 (dd, 1H), 3.12 (dd, 1H), 1.96 (s, 1H), 1.16 (m, 2H), 0.94 (m, 1H), 0.60 (m, 1H), 0.43 (m, 2H); <sup>13</sup>C-NMR(100 MHz, MeOD): 168.38, 168.28, 136.36, 128.06, 124.06, 121.04, 118.78, 118.70, 110.73, 107.72, 55.98, 54.15, 38.81, 32.49, 28.86, 26.55, 20.42.

**Procedure For the Synthesis of Compound Cyclo-L-Trp-L-Arg(s18).** Prepared from L-tryptophan methyl ester hydrochloride (50 mg) and N<sup>α</sup>-Boc-N<sup>ω</sup>-Nitro-L-Arg according to the procedure that synthesis compound **17**, and got the white solid compound **s18** (13.4 mg, 20% yield). <sup>1</sup>H-NMR(400 MHz, MeOD): 7.56 (d, *J* = 7.9 Hz, 1H), 7.29 (d, *J* = 8.1 Hz, 1H), 7.01 (m, 2H), 6.95 (t, 1H), 4.24 (t, 1H), 3.61 (t, 1H), 3.42 (m, 1H), 3.08 (m, 1H), 2.55 (t, 2H), 0.78 (m, 2H), 0.63 (m, 1H), 0.33 (m, 1H); <sup>13</sup>C-NMR (100 MHz, MeOD): 169.12, 167.84, 157.06, 136.44, 127.72, 124.42, 121.15, 118.84, 110.85, 108.04, 56.06, , 53.80, 40.31, 30.67, 29.07, 23.14, 22.95.

**Procedure For the Synthesis of Compound Cyclo-L-Trp-L-Asp(s19) & Cyclo-L-Trp-L-Glu(s20).** To a solution of L-tryptophan methyl ester hydrochloride (50 mg, 1.0 equiv) in CH<sub>2</sub>Cl<sub>2</sub> (0.1 M) at 0 °C was added Et<sub>3</sub>N (4.5 equiv) dropwise. HOBt•H<sub>2</sub>O (1.5 equiv) and N-Boc-L-Asp-OBzl (1.5 equiv) were sequentially added and stirred vigorously. Once homogenous, EDC•HCl (1.5 equiv) was added in a single portion and the solution allowed to warm to 23°C. The reaction was stirred for 15 hours, at which time it was quenched by the addition of 1N HCl, and the aqueous

layer extracted with CH<sub>2</sub>Cl<sub>2</sub> (2 x). The combined organics were then washed with saturated aqueous NaHCO<sub>3</sub>, and the aqueous layer back extracted with CH<sub>2</sub>Cl<sub>2</sub> (2 x). The organics were pooled, then dried over Na<sub>2</sub>SO<sub>4</sub>, filtered, and concentrated in vacuo. The resulting oil/foam was subsequently dissolved in CH<sub>2</sub>Cl<sub>2</sub> (0.2 M), and cooled to 0 °C. TFA (1.5 mL / 5 mL CH<sub>2</sub>Cl<sub>2</sub>) was added dropwise, then the solution was warmed to 23 °C and stirred for 2 h. The mixture was concentrated in vacuo and the resulting viscous residue dissolved in methanol (0.25 M), and cooled to 0 °C. The residue was dissolved in 0.1 M acetic acid-2-butanol, and one equivalent N-methyl morpholine (NMM) was added to the solution. The reaction mixture was refluxed for 3 h under N<sub>2</sub>. The reaction mixture was concentrated in vacuo to a small volume, and the residue was purified by flash chromatography on silica gel (eluent: DCM/MeOH, 40:1) to afford Cyclo-L-Trp-L-Asp-OBzl. In the following steps, Cyclo-L-Trp-L-Asp-OBzl was dissolved in MeOH and Pd-C (10%) was added to the solution. The reaction mixture was stirred at room temperature for 30 min under H<sub>2</sub>. After which Pd-C was removed by filtration, and the solution was evaporated to get the white solid product (14.2 mg, 24% yield). <sup>1</sup>H-NMR (400 MHz, MeOD): 7.58 (d, *J* = 8.0 Hz, 1H), 7.36 (d, *J* = 8.1 Hz, 1H), 7.09 (t, 2H), 7.00 (t, 1H), 4.29 (t, 1H), 4.03 (m, 1H), 3.46 (dd, *J* = 14.6, 4.3 Hz, 1H), 3.17 (dd, *J* = 14.6, 4.3 Hz, 1H), 2.10 (dd, *J* = 17.4, 3.3 Hz, 1H), 0.92 (dd, *J* = 17.4, 9.4 Hz, 1H); <sup>13</sup>C-NMR (100 MHz, MeOD): 172.65, 168.39, 167.08, 136.10, 127.64, 124.48, 121.02, 118.95, 118.08, 110.96, 107.96, 55.91, 51.34, 37.37, 29.43.

**Cyclo-L-Trp-L-Glu(s20)** Prepared from L-tryptophan methyl ester hydrochloride (50 mg) and N-Boc-L-Glu-OBzl according to the procedure that synthesis compound **s19**, and got the white solid compound **s20** (15.5 mg, 25% yield). <sup>1</sup>H-NMR (400 MHz, MeOD) : 7.26 (d, *J* = 7.9 Hz, 1H), 7.34 (d, *J* = 8.1 Hz, 1H), 7.11 (s, 1H), 7.08 (d, 1H), 7.01 (t, 1H), 4.27 (t, 1H), 3.76 (m, 1H), 3.42 (dd, 1H), 3.21 (dd, 1H), 1.79 (m, 1H), 1.69 (m, 1H), 1.47 (m, 1H), 0.64 (M, 1H); <sup>13</sup>C-NMR (100 MHz, MeOD): 172.27, 168.43, 166.25, 136.44, 137.63, 124.16, 121.09, 118.67, 118.34, 110.89, 108.05, 55.93, 54.05, 32.64, 30.72, 29.56.

### General methods for analyzing the structures of NASs

Through analysis of the 1D and 2D NMR data, we confirmed the way that how two DKP subunits connected. Here, two representative compounds **NAS-17** and **NAS-18**, which were all composed of two molecules of cW<sub>L</sub>-V<sub>L</sub>, were took as examples to illustrate the way of thinking. **NAS-17** had a C<sup>3</sup>-C<sup>7</sup> linkage between the two subunits, HMBC correlations from two aromatic protons, H-6' and H-8' and the indole NH proton to a quaternary carbon at δ<sub>C</sub>126.6 (C-4') indicated that the indole was substituted at

C-7' (Supplementary Fig. 12). In addition, HMBC correlations from H-6' and H-8' to  $\delta_C$  58.5 (C-3) confirmed this assignment. **NAS-18** had a C<sup>3</sup>-C<sup>6</sup> linkage between the two subunits, HMBC correlations from two aromatic protons, H-5' and H-7' and the indole NH proton to a quaternary carbon at  $\delta_C$  134.9 (C-9') indicated that the indole was substituted at C-6'. In addition, HMBC correlations from H-5' and H-7' to  $\delta_C$  58.4 (C-3) confirmed this assignment.

Correlations observed in a ROESY experiment (Supplementary Fig. 12) were used to assign the relative configuration of the C2 and C3 stereogenic centres in the products. In **NAS-17**, ROESY correlations between H-2 and the aromatic protons H-6' and H-7' clearly showed that H-2 and the upper cyclic dipeptide were *cis* to each other. The H-11 resonance at showed ROESY correlations to H-2 indicating that these two protons were on the same face; In **NAS-18**, ROESY correlations between H-2 and the aromatic protons H-5' and H-7' clearly showed that H-2 and the upper cyclic dipeptide were *cis* to each other. However, the H-11 resonance at showed no ROESY correlations to H-2 indicating that these two protons were on the different face. With the assistance of the known configuration of H-11, we can confirm that the relative configurations of C2 and C3 in **NAS-17** and **NAS-18** were (**2R, 3S**) and (**2S, 3R**) respectively.

### Bioactivity assay

To investigate the protective effects of compounds **NAS-1-28** against glutamate-induced PC-12 cells apoptosis, PC12 cells were dealt with glutamate to establish cell models. The cell viability was measured by [3-(4,5-dimethylthiazol-2-yl)-2,5-diphenyltetrazolium bromide] (MTT) assay. PC-12 cells were seeded at a density of  $1 \times 10^4$  per well (160  $\mu$ L) in 96-well plates and incubated 24 h, and each compound (20  $\mu$ L, 10  $\mu$ M) was added to four wells separately. At the same time, we set the blank group, control group (15 mM L-Glu), positive drug group (Nimodipine 20  $\mu$ M). After 1 h treatment, L-Glu (20  $\mu$ L, 15 mM) was added to each well. After 24 h treatment, remove the supernatant, add 10% MTT new medium and incubate at 37°C for 4 h. The viability was determined using an MTT kit according to the manufacturer's instructions. The inhibition rate was calculated by the following formula: Inhibition rate %=(OD of the blank group - OD of test group)/(OD of the blank group) \*100 (see Supplementary Table 6).

To observe the effect of compounds on PC12 cell injury induced by A $\beta_{25-35}$  (A4559), PC12 cells were treated with A $\beta_{25-35}$  to build an AD cell model. MTT method was applied in the measurement of cell viability. The PC-12 cells in the logarithmic growth phase were digested, centrifuged and resuspended in complete medium at a density

of  $5 \times 10^4 \text{ mL}^{-1}$ , which were seeded in 96-well plates ( $8 \times 10^3$  / well, 160  $\mu\text{L}$ ). After 24 h incubation, remove the old medium, add the new medium (160  $\mu\text{L}$ ) and the compounds (20  $\mu\text{L}$ , 10  $\mu\text{M}$ ) to per well. After 1 h treatment,  $\text{A}\beta_{25-35}$  (20  $\mu\text{L}$ , 30  $\mu\text{M}$ ) was added to each well. After 48 h treatment, MTT (20  $\mu\text{L}$ ) was added to per well and incubated at  $37^\circ\text{C}$  for 4 h. The viability was determined using an MTT kit according to the manufacturer's instructions. The inhibition rate was calculated by the following formula: Inhibition rate  $\% = (\text{OD of the blank group} - \text{OD of test group}) / (\text{OD of the blank group}) * 100$  (see Supplementary Table 5).



## Supplementary References

1. Saruwatari, T. et al. Cytochrome P450 as dimerization catalyst in diketopiperazine alkaloid biosynthesis. *ChemBioChem* **15**, 656-659 (2014).
2. Kishimoto, S., Sato, M., Tsunematsu, Y. & Watanabe, K. Evaluation of biosynthetic pathway and engineered biosynthesis of alkaloids. *Molecules* **21**, 1078 (2016).
3. Fu, J. et al. Full-length RecE enhances linear-linear homologous recombination and facilitates direct cloning for bioprospecting. *Nat. Biotechnol.* **30**, 440-446 (2012).
4. Sun, Y., He, X., Liang, J., Zhou, X. & Deng, Z. Analysis of functions in plasmid pHZ1358 influencing its genetic and structural stability in *Streptomyces lividans* 1326. *Appl. Microbiol. Biotechnol.* **82**, 303-310 (2009).
5. Sambrook, J. & Russell, D.W. *Molecular Cloning: A Laboratory Manual*, 3rd ed. Cold Spring Harbor Laboratory Press, New York. (2001).
6. Kieser, T., Bibb, M., Butter, M., Chater, K.F. & Hopwood, D.A. *Practical Streptomyces genetics*. The John Innes Foundation, Norwich. (2001)
7. Becke, A. D. A new mixing of Hartree-Fock and local density-functional theories. *J. Chem. Phys.* **98**, 1372-1377 (1993).
8. Becke, A. D. Density-functional thermochemistry. III. The role of exact exchange. *J. Chem. Phys.* **98**, 5648-5652 (1993).
9. Lee, C., Yang, W. & Parr, R. G. Development of the Colle-Salvetti correlation-energy formula into a functional of the electron density. *Phys. Rev. B* **37**, 785-789 (1988).
10. Jaguar, version 8.8, Schrodinger, LLC, New York, (2015).
11. Hay, P. J. & Wadt, W. R. Ab initio effective core potentials for molecular calculations. Potentials for K to Au including the outermost core orbitals. *J. Chem. Phys.* **82**, 299-310 (1985).
12. Tannor, D. J. et al. Accurate first principles calculation of molecular charge distributions and solvation energies from Ab initio quantum mechanics and continuum dielectric theory. *J. Am. Chem. Soc.* **116**, 11875-11882 (1994).
13. Marten, B. et al. New model for calculation of solvation free energies: correction of self-consistent reaction field continuum dielectric theory for short-range hydrogen-bonding effects. *J. Phys. Chem.* **100**, 11775-11788 (1996).
14. Blomberg, M. R., Borowski, T., Himo, F., Liao, R. -Z. & Siegbahn, P. E. M. Quantum chemical studies of mechanisms for metalloenzymes. *Chem. Rev.* **114**, 3601-3658 (2014).

15. Himo, F. & Siegbahn, P. E. M. Quantum chemical studies of radical-containing enzymes. *Chem. Rev.* **103**, 2421-2456 (2003).
16. Siegbahn, P. E. M. Mechanisms of metalloenzymes studied by quantum chemical methods. *Q. Rev. Biophys.* **36**, 91-145 (2003).
17. Frisch, M. J. *et al.* Gaussian 09, Revision D.01, Gaussian, Inc., Wallingford CT (2013).
18. Grimme, S. Accurate description of van der Waals complexes by density functional theory including empirical corrections. *J. Comput. Chem.* **25**, 1463-1473 (2004).
19. Grimme, S. Semiempirical GGA-type density functional constructed with a long-range dispersion correction. *J. Comput. Chem.* **27**, 1787-1799 (2006).
20. Grimme, S., Antony, J. Ehrlich, S. & Krieg, H. A consistent and accurate ab initio parametrization of density functional dispersion correction (DFT-D) for the 94 elements H-Pu. *J. Chem. Phys.* **132**, 154104 (2010).
21. Goerigk, L. & Grimme, S. A thorough benchmark of density functional methods for general main group thermochemistry, kinetics, and noncovalent interactions. *Phys. Chem. Chem. Phys.* **13**, 6670-6688 (2011).
22. Kieffer, M. E., Chuang, K. V. & Reisman, S. E. Copper-catalyzed diastereoselective arylation of tryptophan derivatives: total synthesis of (+)-naseseazines A and B. *J Am Chem Soc.* **135**, 5557-5560 (2013)
23. Paizs, C., Katona, A., Rétey, J. The interaction of heteroaryl-acrylates and alanines with phenylalanine ammonia-lyase from parsley. *Chem. Eur. J.* **12**, 2739-2744 (2006).
