# Supplementary material for: Efficient biosynthesis of heterodimeric C3-aryl pyrroloindoline alkaloids
Source: PubMed Central journal article supplement (PMC6200733; doi:10.1038/s41467-018-06528-z), 2018-10-24
Supplement: 41467_2018_6528_MOESM3_ESM.pdf [file 41467_2018_6528_MOESM3_ESM.pdf]

## **Description of Additional Supplementary Files**

File Name: Supplementary Data 1

Description: Cartesian coordinates of optimized structures
